# Supplementary material for: 消費者の味覚緊急調査 消費者が求める味は「辛」「旨」
Source: Royal Society of Chemistry journal article supplement (doi:10.1039/c7cc08235e), 2010-02-01
Supplement: c7cc08235e2.xlsx [file c7cc08235e2.xlsx]

## Sheet: Protocol
Protocol for MS analysis
LC-MS analysis was performed on a nanoAcquity (Waters, inc) configured with Q-exactive Orbitrap mass spectrometer (ThermoScientific Inc.). Digests were loaded onto a fused silica desalting column packed with 2 cm C18 reverse phase resin (Phenomenex Inc.), and peptides were eluted on a reverse phase column (100 μm fused silica packed with 25 cm C18 resin) using a gradient 5-50% Buffer B in Buffer …

## Sheet: HPG_L1_Localization
Entry	Entry name	Status	Protein names	Gene names	Organism	Length	Subcellular location [CC]	Cellular components
P05556	ITB1_HUMAN	reviewed	Integrin beta-1 (Fibronectin receptor subunit beta) (Glycoprotein IIa) (GPIIA) (VLA-4 subunit beta) (CD antigen CD29)	ITGB1 FNRB MDF2 MSK12	Homo sapiens (Human)	798	SUBCELLULAR LOCATION: Cell membrane {ECO:0000303|PubMed:10455171}; Single-pass type I membrane protein {ECO:0000255}. Cell projection, invadopodium membrane {ECO:0000269|PubMed:10455171}; Single-pass type I membrane protein {ECO:0000255}. Cell projection, ruffle membrane {ECO:0000303|PubMed:10455171}; Single-pass type I membrane protein {ECO:0000255}. Recycling endosome {ECO:0000269|PubMed:162567…	Cell junction
P46821	MAP1B_HUMAN	reviewed	Microtubule-associated protein 1B (MAP-1B) [Cleaved into: MAP1B heavy chain; MAP1 light chain LC1]	MAP1B	Homo sapiens (Human)	2468	SUBCELLULAR LOCATION: Cytoplasm, cytoskeleton {ECO:0000269|PubMed:18195017}. Cytoplasm {ECO:0000269|PubMed:18195017}. Cell junction, synapse {ECO:0000250}. Cell projection, dendritic spine {ECO:0000250}. Note=Colocalizes with DAPK1 in the microtubules and cortical actin fibers. {ECO:0000250}.	Cell junction
Q5VW36	FOCAD_HUMAN	reviewed	Focadhesin	FOCAD KIAA1797	Homo sapiens (Human)	1801	SUBCELLULAR LOCATION: Membrane {ECO:0000305}; Multi-pass membrane protein {ECO:0000305}. Cell junction, focal adhesion. Note=Colocalizes with VCL in astrocytes.	Cell junction
Q68EM7	RHG17_HUMAN	reviewed	Rho GTPase-activating protein 17 (Rho-type GTPase-activating protein 17) (RhoGAP interacting with CIP4 homologs protein 1) (RICH-1)	ARHGAP17 RICH1 MSTP066 MSTP110	Homo sapiens (Human)	881	SUBCELLULAR LOCATION: Membrane; Peripheral membrane protein. Cytoplasm. Cell junction, tight junction. Note=Associates with membranes and concentrates at sites of cell-cell contact.	Cell junction
Q9ULH4	LRFN2_HUMAN	reviewed	Leucine-rich repeat and fibronectin type-III domain-containing protein 2 (Synaptic adhesion-like molecule 1)	LRFN2 KIAA1246 SALM1	Homo sapiens (Human)	789	SUBCELLULAR LOCATION: Membrane; Single-pass type I membrane protein. Cell junction, synapse. Cell junction, synapse, postsynaptic cell membrane {ECO:0000250}.	Cell junction
Q13045	FLII_HUMAN	reviewed	Protein flightless-1 homolog	FLII FLIL	Homo sapiens (Human)	1269	SUBCELLULAR LOCATION: Nucleus {ECO:0000250}. Cytoplasm, cytoskeleton {ECO:0000250}. Cytoplasm, cytoskeleton, microtubule organizing center, centrosome {ECO:0000250}. Cell junction, focal adhesion {ECO:0000250}. Note=Colocalizes to actin-rich structures in blastocysts and, together with HRAS, RHOA and CDC42, in migrating fibroblasts. Localizes to centrosomes (By similarity). {ECO:0000250}.	Cell junction
Q06787	FMR1_HUMAN	reviewed	Synaptic functional regulator FMR1 (Fragile X mental retardation protein 1) (FMRP) (Protein FMR-1)	FMR1	Homo sapiens (Human)	632	SUBCELLULAR LOCATION: Nucleus {ECO:0000269|PubMed:10196376, ECO:0000269|PubMed:16571602, ECO:0000269|PubMed:18936162}. Nucleus, nucleolus {ECO:0000269|PubMed:12837692, ECO:0000269|PubMed:16407062, ECO:0000269|PubMed:16571602, ECO:0000269|PubMed:24658146}. Chromosome, centromere {ECO:0000250|UniProtKB:P35922}. Chromosome {ECO:0000250|UniProtKB:P35922}. Cytoplasm {ECO:0000269|PubMed:10196376, ECO:0…	Cell junction
Q8WXH0	SYNE2_HUMAN	reviewed	Nesprin-2 (KASH domain-containing protein 2) (KASH2) (Nuclear envelope spectrin repeat protein 2) (Nucleus and actin connecting element protein) (Protein NUANCE) (Synaptic nuclear envelope protein 2) (Syne-2)	SYNE2 KIAA1011 NUA	Homo sapiens (Human)	6885	SUBCELLULAR LOCATION: Nucleus outer membrane {ECO:0000305}; Single-pass type IV membrane protein {ECO:0000305}; Cytoplasmic side {ECO:0000305}. Sarcoplasmic reticulum membrane {ECO:0000305|PubMed:15671068}; Single-pass type IV membrane protein {ECO:0000305}. Cell membrane {ECO:0000305}; Single-pass membrane protein {ECO:0000305}. Cytoplasm, cytoskeleton. Mitochondrion. Nucleus, nucleoplasm. Cytop…	Cell junction
Q8NBU5	ATAD1_HUMAN	reviewed	ATPase family AAA domain-containing protein 1 (EC 3.6.1.3) (Thorase)	ATAD1 FNP001	Homo sapiens (Human)	361	SUBCELLULAR LOCATION: Peroxisome {ECO:0000250|UniProtKB:Q9D5T0}. Cell junction, synapse, postsynaptic cell membrane {ECO:0000250|UniProtKB:Q9D5T0}.	Cell junction
B7ZKQ8	B7ZKQ8_HUMAN	unreviewed	Podocalyxin (Podocalyxin-like protein 1)	PODXL	Homo sapiens (Human)	560	SUBCELLULAR LOCATION: Apical cell membrane {ECO:0000256|PIRNR:PIRNR038143}.	Cell membrane
Q96N83	Q96N83_HUMAN	unreviewed	Podocalyxin (Podocalyxin-like protein 1)		Homo sapiens (Human)	518	SUBCELLULAR LOCATION: Apical cell membrane {ECO:0000256|PIRNR:PIRNR038143}.	Cell membrane
Q08499	PDE4D_HUMAN	reviewed	cAMP-specific 3',5'-cyclic phosphodiesterase 4D (EC 3.1.4.53) (DPDE3) (PDE43)	PDE4D DPDE3	Homo sapiens (Human)	809	SUBCELLULAR LOCATION: Apical cell membrane {ECO:0000269|PubMed:14500724}. Cytoplasm {ECO:0000250}. Membrane {ECO:0000250}. Cytoplasm, cytoskeleton {ECO:0000250}. Cytoplasm, cytoskeleton, microtubule organizing center, centrosome {ECO:0000250}. Note=Found in the soluble fraction, associated with membranes, and associated with the cytoskeleton and the centrosome (By similarity). Colocalized with SH…	Cell membrane
O00592	PODXL_HUMAN	reviewed	Podocalyxin (GCTM-2 antigen) (Gp200) (Podocalyxin-like protein 1) (PC) (PCLP-1)	PODXL PCLP PCLP1	Homo sapiens (Human)	558	SUBCELLULAR LOCATION: Apical cell membrane. Cell projection, lamellipodium. Cell projection, filopodium. Cell projection, ruffle. Cell projection, microvillus {ECO:0000250}. Membrane raft {ECO:0000250}. Membrane {ECO:0000305}; Single-pass type I membrane protein {ECO:0000305}. Note=In single attached epithelial cells is restricted to a preapical pole on the free plasma membrane whereas other apic…	Cell membrane
Q99808	S29A1_HUMAN	reviewed	Equilibrative nucleoside transporter 1 (Equilibrative nitrobenzylmercaptopurine riboside-sensitive nucleoside transporter) (Equilibrative NBMPR-sensitive nucleoside transporter) (Nucleoside transporter, es-type) (Solute carrier family 29 member 1)	SLC29A1 ENT1	Homo sapiens (Human)	456	SUBCELLULAR LOCATION: Basolateral cell membrane; Multi-pass membrane protein. Apical cell membrane; Multi-pass membrane protein. Cell membrane; Multi-pass membrane protein. Note=Predominantly localized in the basolateral membrane in polarized MDCK cells.	Cell membrane
Q96FX8	PERP_HUMAN	reviewed	p53 apoptosis effector related to PMP-22 (Keratinocyte-associated protein 1) (KCP-1) (P53-induced protein PIGPC1) (Transmembrane protein THW)	PERP KCP1 KRTCAP1 PIGPC1 THW	Homo sapiens (Human)	193	SUBCELLULAR LOCATION: Cell junction, desmosome {ECO:0000250|UniProtKB:Q9JK95}. Cell membrane {ECO:0000250|UniProtKB:Q9JK95}; Multi-pass membrane protein {ECO:0000255}. Note=Associated with desmosomes. {ECO:0000250|UniProtKB:Q9JK95}.	Cell Junction
Q9NVD7	PARVA_HUMAN	reviewed	Alpha-parvin (Actopaxin) (CH-ILKBP) (Calponin-like integrin-linked kinase-binding protein) (Matrix-remodeling-associated protein 2)	PARVA MXRA2	Homo sapiens (Human)	372	SUBCELLULAR LOCATION: Cell junction, focal adhesion. Cell membrane; Peripheral membrane protein; Cytoplasmic side. Cytoplasm, cytoskeleton. Cytoplasm, myofibril, sarcomere, Z line {ECO:0000250}. Note=Constituent of focal adhesions. Associates with the actin cytoskeleton.	Cell Junction
Q8IVT2	MISP_HUMAN	reviewed	Mitotic interactor and substrate of PLK1 (Mitotic spindle positioning protein)	MISP C19orf21	Homo sapiens (Human)	679	SUBCELLULAR LOCATION: Cell junction, focal adhesion. Cytoplasm, cytoskeleton. Cytoplasm, cell cortex. Note=Predominantly localizes to cortical actin structures during interphase and mitosis. Present in retraction fibers, which are formed at former adhesion sites during mitosis, and at spicular membrane protrusions in re-attaching cytokinetic cells. Partially colocalizes with cytoplasmic F-actin. …	Cell Junction
O43294	TGFI1_HUMAN	reviewed	Transforming growth factor beta-1-induced transcript 1 protein (Androgen receptor coactivator 55 kDa protein) (Androgen receptor-associated protein of 55 kDa) (Hydrogen peroxide-inducible clone 5 protein) (Hic-5)	TGFB1I1 ARA55	Homo sapiens (Human)	461	SUBCELLULAR LOCATION: Cell junction, focal adhesion. Nucleus matrix. Cytoplasm, cytoskeleton. Note=Associated with the actin cytoskeleton; colocalizes with stress fibers.	Cell Junction
Q96HC4	PDLI5_HUMAN	reviewed	PDZ and LIM domain protein 5 (Enigma homolog) (Enigma-like PDZ and LIM domains protein)	PDLIM5 ENH L9	Homo sapiens (Human)	596	SUBCELLULAR LOCATION: Cell junction, synapse, postsynaptic cell membrane, postsynaptic density {ECO:0000250}. Cell junction, synapse, synaptosome {ECO:0000250}. Cytoplasm {ECO:0000250}. Note=Detected both at presynaptic and postsynaptic sites. {ECO:0000250}.	Cell Junction
Q9BTW9	TBCD_HUMAN	reviewed	Tubulin-specific chaperone D (Beta-tubulin cofactor D) (tfcD) (SSD-1) (Tubulin-folding cofactor D)	TBCD KIAA0988 SSD1 TFCD PP1096	Homo sapiens (Human)	1192	SUBCELLULAR LOCATION: Cell junction, tight junction {ECO:0000250|UniProtKB:Q28205}. Lateral cell membrane {ECO:0000250|UniProtKB:Q28205}. Cytoplasm {ECO:0000250|UniProtKB:Q28205}. Cell junction, adherens junction {ECO:0000250|UniProtKB:Q28205}. Cytoplasm, cytoskeleton, microtubule organizing center, centrosome {ECO:0000269|PubMed:27666370}. Note=Localized in cell-cell contacts. {ECO:0000250|UniPr…	Cell Junction
O60610	DIAP1_HUMAN	reviewed	Protein diaphanous homolog 1 (Diaphanous-related formin-1) (DRF1)	DIAPH1 DIAP1	Homo sapiens (Human)	1272	SUBCELLULAR LOCATION: Cell membrane {ECO:0000250|UniProtKB:O08808}. Cell projection, ruffle membrane {ECO:0000250|UniProtKB:O08808}. Cytoplasm, cytoskeleton {ECO:0000269|PubMed:24781755}. Cytoplasm, cytoskeleton, microtubule organizing center, centrosome {ECO:0000269|PubMed:24781755}. Cytoplasm, cytoskeleton, spindle {ECO:0000269|PubMed:24781755}. Note=Membrane ruffles, especially at the tip of r…	Cell membrane
P16070	CD44_HUMAN	reviewed	CD44 antigen (CDw44) (Epican) (Extracellular matrix receptor III) (ECMR-III) (GP90 lymphocyte homing/adhesion receptor) (HUTCH-I) (Heparan sulfate proteoglycan) (Hermes antigen) (Hyaluronate receptor) (Phagocytic glycoprotein 1) (PGP-1) (Phagocytic glycoprotein I) (PGP-I) (CD antigen CD44)	CD44 LHR MDU2 MDU3 MIC4	Homo sapiens (Human)	742	SUBCELLULAR LOCATION: Cell membrane {ECO:0000250|UniProtKB:P15379}; Single-pass type I membrane protein {ECO:0000250|UniProtKB:P15379}. Note=Colocalizes with actin in membrane protrusions at wounding edges. {ECO:0000250|UniProtKB:P15379}.	Cell membrane
O94973	AP2A2_HUMAN	reviewed	AP-2 complex subunit alpha-2 (100 kDa coated vesicle protein C) (Adaptor protein complex AP-2 subunit alpha-2) (Adaptor-related protein complex 2 subunit alpha-2) (Alpha-adaptin C) (Alpha2-adaptin) (Clathrin assembly protein complex 2 alpha-C large chain) (Huntingtin yeast partner J) (Huntingtin-interacting protein 9) (HIP-9) (Huntingtin-interacting protein J) (Plasma membrane adaptor HA2/AP2 ada…	AP2A2 ADTAB CLAPA2 HIP9 HYPJ KIAA0899	Homo sapiens (Human)	939	SUBCELLULAR LOCATION: Cell membrane {ECO:0000250|UniProtKB:P17427}; Peripheral membrane protein {ECO:0000250|UniProtKB:P17427}; Cytoplasmic side {ECO:0000250|UniProtKB:P17427}. Membrane, coated pit {ECO:0000250|UniProtKB:P17427}; Peripheral membrane protein {ECO:0000250|UniProtKB:P17427}; Cytoplasmic side {ECO:0000250|UniProtKB:P17427}. Note=AP-2 appears to be excluded from internalizing CCVs and…	Cell membrane
P09471	GNAO_HUMAN	reviewed	Guanine nucleotide-binding protein G(o) subunit alpha	GNAO1	Homo sapiens (Human)	354	SUBCELLULAR LOCATION: Cell membrane {ECO:0000250|UniProtKB:P18872}. Membrane {ECO:0000305}; Lipid-anchor {ECO:0000305}.	Cell membrane
P26232	CTNA2_HUMAN	reviewed	Catenin alpha-2 (Alpha N-catenin) (Alpha-catenin-related protein)	CTNNA2 CAPR	Homo sapiens (Human)	953	SUBCELLULAR LOCATION: Cell membrane {ECO:0000250|UniProtKB:Q61301}; Peripheral membrane protein {ECO:0000250|UniProtKB:Q61301}; Cytoplasmic side {ECO:0000250|UniProtKB:Q61301}. Cytoplasm {ECO:0000269|PubMed:16182284}. Cytoplasm, cytoskeleton {ECO:0000250|UniProtKB:Q61301}. Cell junction, adherens junction {ECO:0000250|UniProtKB:Q61301}. Cell projection, axon {ECO:0000250|UniProtKB:Q61301}. Nucleu…	Cell membrane
O95782	AP2A1_HUMAN	reviewed	AP-2 complex subunit alpha-1 (100 kDa coated vesicle protein A) (Adaptor protein complex AP-2 subunit alpha-1) (Adaptor-related protein complex 2 subunit alpha-1) (Alpha-adaptin A) (Alpha1-adaptin) (Clathrin assembly protein complex 2 alpha-A large chain) (Plasma membrane adaptor HA2/AP2 adaptin alpha A subunit)	AP2A1 ADTAA CLAPA1	Homo sapiens (Human)	977	SUBCELLULAR LOCATION: Cell membrane {ECO:0000250}. Membrane, coated pit {ECO:0000250}; Peripheral membrane protein {ECO:0000250}; Cytoplasmic side {ECO:0000250}. Note=AP-2 appears to be excluded from internalizing CCVs and to disengage from sites of endocytosis seconds before internalization of the nascent CCV. {ECO:0000250}.	Cell membrane
Q8WUX1	S38A5_HUMAN	reviewed	Sodium-coupled neutral amino acid transporter 5 (Solute carrier family 38 member 5) (System N transporter 2)	SLC38A5 JM24 SN2 SNAT5 PP7194	Homo sapiens (Human)	472	SUBCELLULAR LOCATION: Cell membrane {ECO:0000250}; Multi-pass membrane protein {ECO:0000250}.	Cell membrane
Q8IYB5	SMAP1_HUMAN	reviewed	Stromal membrane-associated protein 1	SMAP1	Homo sapiens (Human)	467	SUBCELLULAR LOCATION: Cell membrane {ECO:0000250}; Peripheral membrane protein {ECO:0000250}; Cytoplasmic side {ECO:0000250}.	Cell membrane
P05026	AT1B1_HUMAN	reviewed	Sodium/potassium-transporting ATPase subunit beta-1 (Sodium/potassium-dependent ATPase subunit beta-1)	ATP1B1 ATP1B	Homo sapiens (Human)	303	SUBCELLULAR LOCATION: Cell membrane {ECO:0000255}; Single-pass type II membrane protein {ECO:0000255}. Cell membrane, sarcolemma {ECO:0000250|UniProtKB:P14094}. Note=Colocalizes with OBSCN at the intercalated disk and sarcolemma in cardiomyocytes. Localizes in long striations at the level of Z and M lines. {ECO:0000250|UniProtKB:P14094}.	Cell membrane
A0A024R2P0	A0A024R2P0_HUMAN	unreviewed	40S ribosomal protein SA (37 kDa laminin receptor precursor) (37LRP) (37/67 kDa laminin receptor) (LRP/LR) (67 kDa laminin receptor) (67LR) (Laminin receptor 1) (LamR) (Laminin-binding protein precursor p40) (LBP/p40)	RPSA hCG_1997894	Homo sapiens (Human)	295	SUBCELLULAR LOCATION: Cell membrane {ECO:0000256|HAMAP-Rule:MF_03016}. Cytoplasm {ECO:0000256|HAMAP-Rule:MF_03016}. Nucleus {ECO:0000256|HAMAP-Rule:MF_03016}. Note=67LR is found at the surface of the plasma membrane, with its C-terminal laminin-binding domain accessible to extracellular ligands. 37LRP is found at the cell surface, in the cytoplasm and in the nucleus. Co-localizes with PPP1R16B in…	Cell membrane
A0A0C4DG17	A0A0C4DG17_HUMAN	unreviewed	40S ribosomal protein SA (37 kDa laminin receptor precursor) (37LRP) (37/67 kDa laminin receptor) (LRP/LR) (67 kDa laminin receptor) (67LR) (Laminin receptor 1) (LamR) (Laminin-binding protein precursor p40) (LBP/p40)	RPSA hCG_1997894	Homo sapiens (Human)	300	SUBCELLULAR LOCATION: Cell membrane {ECO:0000256|HAMAP-Rule:MF_03016}. Cytoplasm {ECO:0000256|HAMAP-Rule:MF_03016}. Nucleus {ECO:0000256|HAMAP-Rule:MF_03016}. Note=67LR is found at the surface of the plasma membrane, with its C-terminal laminin-binding domain accessible to extracellular ligands. 37LRP is found at the cell surface, in the cytoplasm and in the nucleus. Co-localizes with PPP1R16B in…	Cell membrane
Q96RS2	Q96RS2_HUMAN	unreviewed	40S ribosomal protein SA (37 kDa laminin receptor precursor) (37LRP) (37/67 kDa laminin receptor) (LRP/LR) (67 kDa laminin receptor) (67LR) (Laminin receptor 1) (LamR) (Laminin-binding protein precursor p40) (LBP/p40)	RPSA	Homo sapiens (Human)	295	SUBCELLULAR LOCATION: Cell membrane {ECO:0000256|HAMAP-Rule:MF_03016}. Cytoplasm {ECO:0000256|HAMAP-Rule:MF_03016}. Nucleus {ECO:0000256|HAMAP-Rule:MF_03016}. Note=67LR is found at the surface of the plasma membrane, with its C-terminal laminin-binding domain accessible to extracellular ligands. 37LRP is found at the cell surface, in the cytoplasm and in the nucleus. Co-localizes with PPP1R16B in…	Cell membrane
A0A126GVT3	A0A126GVT3_HUMAN	unreviewed	Olfactory receptor	OR9Q2	Homo sapiens (Human)	270	SUBCELLULAR LOCATION: Cell membrane {ECO:0000256|RuleBase:RU363047, ECO:0000256|SAAS:SAAS00857205}; Multi-pass membrane protein {ECO:0000256|RuleBase:RU363047, ECO:0000256|SAAS:SAAS00857205}.	Cell membrane
A0A126GW85	A0A126GW85_HUMAN	unreviewed	Olfactory receptor	OR9Q2 hCG_2044355	Homo sapiens (Human)	314	SUBCELLULAR LOCATION: Cell membrane {ECO:0000256|RuleBase:RU363047, ECO:0000256|SAAS:SAAS00857205}; Multi-pass membrane protein {ECO:0000256|RuleBase:RU363047, ECO:0000256|SAAS:SAAS00857205}.	Cell membrane
B9EIK5	B9EIK5_HUMAN	unreviewed	Olfactory receptor	OR9Q2	Homo sapiens (Human)	314	SUBCELLULAR LOCATION: Cell membrane {ECO:0000256|RuleBase:RU363047, ECO:0000256|SAAS:SAAS00857205}; Multi-pass membrane protein {ECO:0000256|RuleBase:RU363047, ECO:0000256|SAAS:SAAS00857205}.	Cell membrane
A0A0A0MRG0	A0A0A0MRG0_HUMAN	unreviewed	Calcitonin receptor	CALCR	Homo sapiens (Human)	508	SUBCELLULAR LOCATION: Cell membrane {ECO:0000256|SAAS:SAAS00834153}; Multi-pass membrane protein {ECO:0000256|SAAS:SAAS00834153}.	Cell membrane
A0A0A0MSQ7	A0A0A0MSQ7_HUMAN	unreviewed	Calcitonin receptor (Calcitonin receptor, isoform CRA_a)	CALCR hCG_17248	Homo sapiens (Human)	490	SUBCELLULAR LOCATION: Cell membrane {ECO:0000256|SAAS:SAAS00834153}; Multi-pass membrane protein {ECO:0000256|SAAS:SAAS00834153}.	Cell membrane
A0A0C4DG16	A0A0C4DG16_HUMAN	unreviewed	Calcitonin receptor	CALCR	Homo sapiens (Human)	474	SUBCELLULAR LOCATION: Cell membrane {ECO:0000256|SAAS:SAAS00834153}; Multi-pass membrane protein {ECO:0000256|SAAS:SAAS00834153}.	Cell membrane
D8MIV1	D8MIV1_HUMAN	unreviewed	Calcitonin receptor	CALCR	Homo sapiens (Human)	474	SUBCELLULAR LOCATION: Cell membrane {ECO:0000256|SAAS:SAAS00834153}; Multi-pass membrane protein {ECO:0000256|SAAS:SAAS00834153}.	Cell membrane
Q9UJZ1	STML2_HUMAN	reviewed	Stomatin-like protein 2, mitochondrial (SLP-2) (EPB72-like protein 2) (Paraprotein target 7) (Paratarg-7)	STOML2 SLP2 HSPC108	Homo sapiens (Human)	356	SUBCELLULAR LOCATION: Cell membrane {ECO:0000269|PubMed:10713127, ECO:0000269|PubMed:18641330, ECO:0000269|PubMed:21746876, ECO:0000269|PubMed:22623988}; Peripheral membrane protein {ECO:0000269|PubMed:10713127}. Mitochondrion {ECO:0000269|PubMed:18641330, ECO:0000269|PubMed:19597348, ECO:0000269|PubMed:22623988}. Mitochondrion inner membrane {ECO:0000269|PubMed:17121834, ECO:0000269|PubMed:18339…	Cell membrane
Q9UIQ6	LCAP_HUMAN	reviewed	Leucyl-cystinyl aminopeptidase (Cystinyl aminopeptidase) (EC 3.4.11.3) (Insulin-regulated membrane aminopeptidase) (Insulin-responsive aminopeptidase) (IRAP) (Oxytocinase) (OTase) (Placental leucine aminopeptidase) (P-LAP) [Cleaved into: Leucyl-cystinyl aminopeptidase, pregnancy serum form]	LNPEP OTASE	Homo sapiens (Human)	1025	SUBCELLULAR LOCATION: Cell membrane {ECO:0000269|PubMed:11389728}; Single-pass type II membrane protein {ECO:0000269|PubMed:11389728}. Note=In brain only the membrane-bound form is found. The protein resides in intracellular vesicles together with GLUT4 and can then translocate to the cell surface in response to insulin and/or oxytocin. Localization may be determined by dileucine internalization …	Cell membrane
Q6YHK3	CD109_HUMAN	reviewed	CD109 antigen (150 kDa TGF-beta-1-binding protein) (C3 and PZP-like alpha-2-macroglobulin domain-containing protein 7) (Platelet-specific Gov antigen) (p180) (r150) (CD antigen CD109)	CD109 CPAMD7	Homo sapiens (Human)	1445	SUBCELLULAR LOCATION: Cell membrane {ECO:0000269|PubMed:11861284, ECO:0000269|PubMed:16754747}; Lipid-anchor, GPI-anchor {ECO:0000269|PubMed:11861284, ECO:0000269|PubMed:16754747}.	Cell membrane
O15031	PLXB2_HUMAN	reviewed	Plexin-B2 (MM1)	PLXNB2 KIAA0315	Homo sapiens (Human)	1838	SUBCELLULAR LOCATION: Cell membrane {ECO:0000269|PubMed:12533544}; Single-pass type I membrane protein {ECO:0000269|PubMed:12533544}.	Cell membrane
P53985	MOT1_HUMAN	reviewed	Monocarboxylate transporter 1 (MCT 1) (Solute carrier family 16 member 1)	SLC16A1 MCT1	Homo sapiens (Human)	500	SUBCELLULAR LOCATION: Cell membrane {ECO:0000269|PubMed:15505343, ECO:0000269|PubMed:17127621, ECO:0000269|PubMed:24390345}; Multi-pass membrane protein {ECO:0000269|PubMed:15505343, ECO:0000269|PubMed:17127621, ECO:0000269|PubMed:24390345}.	Cell membrane
P35613	BASI_HUMAN	reviewed	Basigin (5F7) (Collagenase stimulatory factor) (Extracellular matrix metalloproteinase inducer) (EMMPRIN) (Leukocyte activation antigen M6) (OK blood group antigen) (Tumor cell-derived collagenase stimulatory factor) (TCSF) (CD antigen CD147)	BSG UNQ6505/PRO21383	Homo sapiens (Human)	385	SUBCELLULAR LOCATION: Cell membrane {ECO:0000269|PubMed:15946952, ECO:0000269|PubMed:17127621, ECO:0000269|PubMed:21536654}; Single-pass type I membrane protein {ECO:0000303|PubMed:15946952}. Melanosome {ECO:0000269|PubMed:17081065}. Note=Identified by mass spectrometry in melanosome fractions from stage I to stage IV. In spermatozoa, localized on the principal piece of caput and in the middle pi…	Cell membrane
Q9NR22	ANM8_HUMAN	reviewed	Protein arginine N-methyltransferase 8 (EC 2.1.1.-) (Heterogeneous nuclear ribonucleoprotein methyltransferase-like protein 4)	PRMT8 HRMT1L3 HRMT1L4	Homo sapiens (Human)	394	SUBCELLULAR LOCATION: Cell membrane {ECO:0000269|PubMed:16051612, ECO:0000269|PubMed:18320585}; Lipid-anchor {ECO:0000269|PubMed:16051612, ECO:0000269|PubMed:18320585}; Cytoplasmic side {ECO:0000269|PubMed:16051612, ECO:0000269|PubMed:18320585}.	Cell membrane
P33527	MRP1_HUMAN	reviewed	Multidrug resistance-associated protein 1 (ATP-binding cassette sub-family C member 1) (Leukotriene C(4) transporter) (LTC4 transporter)	ABCC1 MRP MRP1	Homo sapiens (Human)	1531	SUBCELLULAR LOCATION: Cell membrane {ECO:0000269|PubMed:16230346}; Multi-pass membrane protein {ECO:0000255|PROSITE-ProRule:PRU00441, ECO:0000269|PubMed:16230346}.	Cell membrane
Q9H6X2	ANTR1_HUMAN	reviewed	Anthrax toxin receptor 1 (Tumor endothelial marker 8)	ANTXR1 ATR TEM8	Homo sapiens (Human)	564	SUBCELLULAR LOCATION: Cell membrane {ECO:0000269|PubMed:16762926}; Single-pass type I membrane protein {ECO:0000269|PubMed:16762926}. Cell projection, lamellipodium membrane {ECO:0000269|PubMed:16762926}; Single-pass type I membrane protein {ECO:0000269|PubMed:16762926}. Cell projection, filopodium membrane {ECO:0000269|PubMed:16762926}; Single-pass type I membrane protein {ECO:0000269|PubMed:167…	Cell membrane
Q9H0U3	MAGT1_HUMAN	reviewed	Magnesium transporter protein 1 (MagT1) (Implantation-associated protein) (IAP)	MAGT1 IAG2 PSEC0084 UNQ628/PRO1244	Homo sapiens (Human)	335	SUBCELLULAR LOCATION: Cell membrane {ECO:0000269|PubMed:19717468}; Multi-pass membrane protein {ECO:0000269|PubMed:19717468}. Endoplasmic reticulum {ECO:0000269|PubMed:25135935}. Endoplasmic reticulum membrane {ECO:0000250}; Multi-pass membrane protein {ECO:0000250}.	Cell membrane
Q9P241	AT10D_HUMAN	reviewed	Probable phospholipid-transporting ATPase VD (EC 3.6.3.1) (ATPase class V type 10D) (P4-ATPase flippase complex alpha subunit ATP10D)	ATP10D ATPVD KIAA1487	Homo sapiens (Human)	1426	SUBCELLULAR LOCATION: Cell membrane {ECO:0000269|PubMed:21914794}; Multi-pass membrane protein {ECO:0000269|PubMed:21914794}. Endoplasmic reticulum membrane {ECO:0000269|PubMed:21914794}. Note=Exit from the endoplasmic reticulum requires the presence of TMEM30A, but not that of TMEM30B.	Cell membrane
P10644	KAP0_HUMAN	reviewed	cAMP-dependent protein kinase type I-alpha regulatory subunit (Tissue-specific extinguisher 1) (TSE1)	PRKAR1A PKR1 PRKAR1 TSE1	Homo sapiens (Human)	381	SUBCELLULAR LOCATION: Cell membrane {ECO:0000269|PubMed:23115245}.	Cell membrane
Q14156	EFR3A_HUMAN	reviewed	Protein EFR3 homolog A (Protein EFR3-like)	EFR3A KIAA0143	Homo sapiens (Human)	821	SUBCELLULAR LOCATION: Cell membrane {ECO:0000269|PubMed:23229899, ECO:0000269|PubMed:25380825}; Lipid-anchor {ECO:0000269|PubMed:23229899, ECO:0000269|PubMed:25380825}. Cytoplasm, cytosol {ECO:0000269|PubMed:25380825}. Note=Palmitoylation anchors the protein to the plasma membrane (PubMed:23229899, PubMed:25380825, PubMed:26571211). A small amount is observed in the cytosol (PubMed:25380825). {EC…	Cell membrane
P43353	AL3B1_HUMAN	reviewed	Aldehyde dehydrogenase family 3 member B1 (EC 1.2.1.5) (Aldehyde dehydrogenase 7)	ALDH3B1 ALDH7	Homo sapiens (Human)	468	SUBCELLULAR LOCATION: Cell membrane {ECO:0000269|PubMed:23721920}; Lipid-anchor {ECO:0000269|PubMed:23721920}. Note=Primarily in the plasma membrane as well as in some punctate structures in the cytoplasm.	Cell membrane
Q13641	TPBG_HUMAN	reviewed	Trophoblast glycoprotein (5T4 oncofetal antigen) (5T4 oncofetal trophoblast glycoprotein) (5T4 oncotrophoblast glycoprotein) (M6P1) (Wnt-activated inhibitory factor 1) (WAIF1)	TPBG 5T4	Homo sapiens (Human)	420	SUBCELLULAR LOCATION: Cell membrane {ECO:0000269|PubMed:24582434}; Single-pass type I membrane protein {ECO:0000269|PubMed:24582434}.	Cell membrane
Q9Y4C2	TCAF1_HUMAN	reviewed	TRPM8 channel-associated factor 1 (TRP channel-associated factor 1)	TCAF1 FAM115A KIAA0738	Homo sapiens (Human)	921	SUBCELLULAR LOCATION: Cell membrane {ECO:0000269|PubMed:25559186}. Note=Colocalizes with TRPM8 on the plasma membrane. {ECO:0000269|PubMed:25559186}.	Cell membrane
Q8WTV0	SCRB1_HUMAN	reviewed	Scavenger receptor class B member 1 (SRB1) (CD36 and LIMPII analogous 1) (CLA-1) (CD36 antigen-like 1) (Collagen type I receptor, thrombospondin receptor-like 1) (SR-BI) (CD antigen CD36)	SCARB1 CD36L1 CLA1	Homo sapiens (Human)	552	SUBCELLULAR LOCATION: Cell membrane {ECO:0000269|PubMed:26965621}; Multi-pass membrane protein. Membrane, caveola {ECO:0000250|UniProtKB:Q61009}; Multi-pass membrane protein. Note=Predominantly localized to cholesterol and sphingomyelin-enriched domains within the plasma membrane, called caveolae.	Cell membrane
Q15043	S39AE_HUMAN	reviewed	Zinc transporter ZIP14 (LIV-1 subfamily of ZIP zinc transporter 4) (LZT-Hs4) (Solute carrier family 39 member 14) (Zrt- and Irt-like protein 14) (ZIP-14)	SLC39A14 KIAA0062 ZIP14	Homo sapiens (Human)	492	SUBCELLULAR LOCATION: Cell membrane {ECO:0000269|PubMed:27231142}; Multi-pass membrane protein {ECO:0000255}. Cytoplasm {ECO:0000269|PubMed:27231142}. Cell projection, lamellipodium {ECO:0000269|PubMed:12659941, ECO:0000269|PubMed:15642354}. Note=Localized to the plasma membrane and also found colocalized with F-actin concentrated on lamellipodiae. {ECO:0000269|PubMed:12659941, ECO:0000269|PubMed…	Cell membrane
Q14160	SCRIB_HUMAN	reviewed	Protein scribble homolog (Scribble) (hScrib) (Protein LAP4)	SCRIB CRIB1 KIAA0147 LAP4 SCRB1 VARTUL	Homo sapiens (Human)	1630	SUBCELLULAR LOCATION: Cell membrane {ECO:0000269|PubMed:28169360}; Peripheral membrane protein. Cell junction, adherens junction. Cell projection, lamellipodium. Cytoplasm. Note=Targeting to cell-cell junctions which is CDH1-dependent is required for the pro-apoptotic activity. Localizes to neuronal post- and pre-synaptic regions.	Cell membrane
P27105	STOM_HUMAN	reviewed	Erythrocyte band 7 integral membrane protein (Protein 7.2b) (Stomatin)	STOM BND7 EPB72	Homo sapiens (Human)	288	SUBCELLULAR LOCATION: Cell membrane {ECO:0000269|PubMed:9243190}; Peripheral membrane protein {ECO:0000269|PubMed:9243190}; Cytoplasmic side {ECO:0000269|PubMed:9243190}. Cytoplasm, cytoskeleton {ECO:0000269|PubMed:9243190}. Cell membrane {ECO:0000269|PubMed:12130500}; Lipid-anchor {ECO:0000269|PubMed:12130500}; Cytoplasmic side {ECO:0000269|PubMed:12130500}. Membrane raft {ECO:0000269|PubMed:121…	Cell membrane
P29992	GNA11_HUMAN	reviewed	Guanine nucleotide-binding protein subunit alpha-11 (G alpha-11) (G-protein subunit alpha-11) (Guanine nucleotide-binding protein G(y) subunit alpha)	GNA11 GA11	Homo sapiens (Human)	359	SUBCELLULAR LOCATION: Cell membrane {ECO:0000305|PubMed:18703424}; Lipid-anchor {ECO:0000305|PubMed:18703424}. Cytoplasm {ECO:0000269|PubMed:18703424}. Note=In testicular cells, expressed exclusively in the cytoplasm.	Cell membrane
Q9Y6M0	TEST_HUMAN	reviewed	Testisin (EC 3.4.21.-) (Eosinophil serine protease 1) (ESP-1) (Serine protease 21)	PRSS21 ESP1 TEST1 UNQ266/PRO303	Homo sapiens (Human)	314	SUBCELLULAR LOCATION: Cell membrane {ECO:0000305}; Lipid-anchor, GPI-anchor {ECO:0000305}.	Cell membrane
P30988	CALCR_HUMAN	reviewed	Calcitonin receptor (CT-R)	CALCR	Homo sapiens (Human)	508	SUBCELLULAR LOCATION: Cell membrane; Multi-pass membrane protein.	Cell membrane
P11166	GTR1_HUMAN	reviewed	Solute carrier family 2, facilitated glucose transporter member 1 (Glucose transporter type 1, erythrocyte/brain) (GLUT-1) (HepG2 glucose transporter)	SLC2A1 GLUT1	Homo sapiens (Human)	492	SUBCELLULAR LOCATION: Cell membrane; Multi-pass membrane protein. Melanosome. Note=Localizes primarily at the cell surface. Identified by mass spectrometry in melanosome fractions from stage I to stage IV.	Cell membrane
A0FGR8	ESYT2_HUMAN	reviewed	Extended synaptotagmin-2 (E-Syt2) (Chr2Syt)	ESYT2 FAM62B KIAA1228	Homo sapiens (Human)	921	SUBCELLULAR LOCATION: Cell membrane; Peripheral membrane protein. Endoplasmic reticulum membrane; Multi-pass membrane protein. Note=Detected at sites of contact between the endoplasmic reticulum membrane and the cell membrane. Recruited to the cell membrane via the third C2 domain.	Cell membrane
Q14126	DSG2_HUMAN	reviewed	Desmoglein-2 (Cadherin family member 5) (HDGC)	DSG2 CDHF5	Homo sapiens (Human)	1118	SUBCELLULAR LOCATION: Cell membrane; Single-pass type I membrane protein. Cell junction, desmosome.	Cell membrane
P00533	EGFR_HUMAN	reviewed	Epidermal growth factor receptor (EC 2.7.10.1) (Proto-oncogene c-ErbB-1) (Receptor tyrosine-protein kinase erbB-1)	EGFR ERBB ERBB1 HER1	Homo sapiens (Human)	1210	SUBCELLULAR LOCATION: Cell membrane; Single-pass type I membrane protein. Endoplasmic reticulum membrane; Single-pass type I membrane protein. Golgi apparatus membrane; Single-pass type I membrane protein. Nucleus membrane; Single-pass type I membrane protein. Endosome. Endosome membrane. Nucleus. Note=In response to EGF, translocated from the cell membrane to the nucleus via Golgi and ER. Endocy…	Cell membrane
P19174	PLCG1_HUMAN	reviewed	1-phosphatidylinositol 4,5-bisphosphate phosphodiesterase gamma-1 (EC 3.1.4.11) (PLC-148) (Phosphoinositide phospholipase C-gamma-1) (Phospholipase C-II) (PLC-II) (Phospholipase C-gamma-1) (PLC-gamma-1)	PLCG1 PLC1	Homo sapiens (Human)	1290	SUBCELLULAR LOCATION: Cell projection, lamellipodium. Cell projection, ruffle. Note=Rapidly redistributed to ruffles and lamellipodia structures in response to epidermal growth factor (EGF) treatment.	Cell membrane
Q9Y490	TLN1_HUMAN	reviewed	Talin-1	TLN1 KIAA1027 TLN	Homo sapiens (Human)	2541	SUBCELLULAR LOCATION: Cell projection, ruffle membrane {ECO:0000250}; Peripheral membrane protein {ECO:0000250}; Cytoplasmic side {ECO:0000250}. Cytoplasm, cytoskeleton {ECO:0000250}. Cell surface {ECO:0000250}. Cell junction, focal adhesion {ECO:0000250}. Note=Colocalizes with LAYN at the membrane ruffles. Localized preferentially in focal adhesions than fibrillar adhesions (By similarity). {ECO…	Cell membrane
O14745	NHRF1_HUMAN	reviewed	Na(+)/H(+) exchange regulatory cofactor NHE-RF1 (NHERF-1) (Ezrin-radixin-moesin-binding phosphoprotein 50) (EBP50) (Regulatory cofactor of Na(+)/H(+) exchanger) (Sodium-hydrogen exchanger regulatory factor 1) (Solute carrier family 9 isoform A3 regulatory factor 1)	SLC9A3R1 NHERF NHERF1	Homo sapiens (Human)	358	SUBCELLULAR LOCATION: Cytoplasm {ECO:0000250}. Apical cell membrane {ECO:0000250}. Endomembrane system; Peripheral membrane protein. Cell projection, filopodium. Cell projection, ruffle. Cell projection, microvillus. Note=Translocates from the cytoplasm to the apical cell membrane in a PODXL-dependent manner. Colocalizes with CFTR at the midpiece of sperm tail (By similarity). Colocalizes with ac…	Cell membrane
Q96L46	CPNS2_HUMAN	reviewed	Calpain small subunit 2 (CSS2) (Calcium-dependent protease small subunit 2)	CAPNS2	Homo sapiens (Human)	248	SUBCELLULAR LOCATION: Cytoplasm {ECO:0000250}. Cell membrane {ECO:0000250}. Note=Translocates to the plasma membrane upon calcium binding. {ECO:0000250}.	Cell membrane
Q5T5C0	STXB5_HUMAN	reviewed	Syntaxin-binding protein 5 (Lethal(2) giant larvae protein homolog 3) (Tomosyn-1)	STXBP5 LLGL3	Homo sapiens (Human)	1151	SUBCELLULAR LOCATION: Cytoplasm {ECO:0000250}. Cell membrane {ECO:0000250}; Peripheral membrane protein {ECO:0000250}. Cytoplasmic vesicle membrane {ECO:0000250}; Peripheral membrane protein {ECO:0000250}. Cytoplasmic vesicle, secretory vesicle, synaptic vesicle {ECO:0000250}. Cell junction, synapse {ECO:0000250}. Note=Cytoplasmic, and associated with vesicular membranes and the plasma membrane. …	Cell membrane
Q9UNF0	PACN2_HUMAN	reviewed	Protein kinase C and casein kinase substrate in neurons protein 2 (Syndapin-2) (Syndapin-II)	PACSIN2	Homo sapiens (Human)	486	SUBCELLULAR LOCATION: Cytoplasm {ECO:0000250}. Cytoplasm, cytoskeleton {ECO:0000250}. Cytoplasmic vesicle membrane; Peripheral membrane protein; Cytoplasmic side. Early endosome. Recycling endosome membrane. Cell projection, ruffle membrane; Peripheral membrane protein; Cytoplasmic side. Cell membrane; Peripheral membrane protein; Cytoplasmic side. Cell projection {ECO:0000250}. Membrane, caveola…	Cell membrane
Q9UDY4	DNJB4_HUMAN	reviewed	DnaJ homolog subfamily B member 4 (Heat shock 40 kDa protein 1 homolog) (HSP40 homolog) (Heat shock protein 40 homolog) (Human liver DnaJ-like protein)	DNAJB4 DNAJW HLJ1	Homo sapiens (Human)	337	SUBCELLULAR LOCATION: Cytoplasm {ECO:0000269|PubMed:18837411}. Cell membrane {ECO:0000269|PubMed:16542645}. Note=Cytoplasmic according to PubMed:18837411 and membrane-associated according to PubMed:16542645.	Cell membrane
Q9NZB2	F120A_HUMAN	reviewed	Constitutive coactivator of PPAR-gamma-like protein 1 (Oxidative stress-associated Src activator) (Protein FAM120A)	FAM120A C9orf10 KIAA0183 OSSA	Homo sapiens (Human)	1118	SUBCELLULAR LOCATION: Cytoplasm {ECO:0000269|PubMed:19015244}. Cell membrane {ECO:0000269|PubMed:19015244}; Peripheral membrane protein {ECO:0000269|PubMed:19015244}; Cytoplasmic side {ECO:0000269|PubMed:19015244}. Note=Translocates to plasma membrane upon ultraviolet exposure.	Cell membrane
P31323	KAP3_HUMAN	reviewed	cAMP-dependent protein kinase type II-beta regulatory subunit	PRKAR2B	Homo sapiens (Human)	418	SUBCELLULAR LOCATION: Cytoplasm {ECO:0000269|PubMed:21423175}. Cell membrane {ECO:0000269|PubMed:21423175}. Note=Colocalizes with PJA2 in the cytoplasm and at the cell membrane.	Cell membrane
P07384	CAN1_HUMAN	reviewed	Calpain-1 catalytic subunit (EC 3.4.22.52) (Calcium-activated neutral proteinase 1) (CANP 1) (Calpain mu-type) (Calpain-1 large subunit) (Cell proliferation-inducing gene 30 protein) (Micromolar-calpain) (muCANP)	CAPN1 CANPL1 PIG30	Homo sapiens (Human)	714	SUBCELLULAR LOCATION: Cytoplasm {ECO:0000269|PubMed:21531719, ECO:0000269|PubMed:8769305}. Cell membrane {ECO:0000269|PubMed:8769305}. Note=Translocates to the plasma membrane upon Ca(2+) binding. In granular keratinocytes and in lower corneocytes, colocalizes with FLG and FLG2 (PubMed:21531719). {ECO:0000269|PubMed:21531719}.	Cell membrane
P35611	ADDA_HUMAN	reviewed	Alpha-adducin (Erythrocyte adducin subunit alpha)	ADD1 ADDA	Homo sapiens (Human)	737	SUBCELLULAR LOCATION: Cytoplasm, cytoskeleton. Cell membrane; Peripheral membrane protein; Cytoplasmic side.	Cell membrane
Q92597	NDRG1_HUMAN	reviewed	Protein NDRG1 (Differentiation-related gene 1 protein) (DRG-1) (N-myc downstream-regulated gene 1 protein) (Nickel-specific induction protein Cap43) (Reducing agents and tunicamycin-responsive protein) (RTP) (Rit42)	NDRG1 CAP43 DRG1 RTP	Homo sapiens (Human)	394	SUBCELLULAR LOCATION: Cytoplasm, cytosol. Cytoplasm, cytoskeleton, microtubule organizing center, centrosome. Nucleus. Cell membrane. Note=Mainly cytoplasmic but differentially localized to other regions. Associates with the plasma membrane in intestinal epithelia and lactating mammary gland. Translocated to the nucleus in a p53/TP53-dependent manner. In prostate epithelium and placental chorion,…	Cell membrane
P14735	IDE_HUMAN	reviewed	Insulin-degrading enzyme (EC 3.4.24.56) (Abeta-degrading protease) (Insulin protease) (Insulinase) (Insulysin)	IDE	Homo sapiens (Human)	1019	SUBCELLULAR LOCATION: Cytoplasm. Cell membrane. Secreted {ECO:0000250}. Note=Present at the cell surface of neuron cells. The membrane-associated isoform is approximately 5 kDa larger than the known cytosolic isoform.	Cell membrane
Q9Y5X1	SNX9_HUMAN	reviewed	Sorting nexin-9 (SH3 and PX domain-containing protein 1) (Protein SDP1) (SH3 and PX domain-containing protein 3A)	SNX9 SH3PX1 SH3PXD3A	Homo sapiens (Human)	595	SUBCELLULAR LOCATION: Cytoplasmic vesicle membrane; Peripheral membrane protein; Cytoplasmic side. Cell membrane; Peripheral membrane protein; Cytoplasmic side. Cytoplasmic vesicle, clathrin-coated vesicle. Golgi apparatus, trans-Golgi network. Cell projection, ruffle. Cytoplasm. Note=Localized at sites of endocytosis at the cell membrane. Detected on newly formed macropinosomes. Transiently recr…	Cell membrane
Q9BSJ8	ESYT1_HUMAN	reviewed	Extended synaptotagmin-1 (E-Syt1) (Membrane-bound C2 domain-containing protein)	ESYT1 FAM62A KIAA0747 MBC2	Homo sapiens (Human)	1104	SUBCELLULAR LOCATION: Endoplasmic reticulum membrane; Multi-pass membrane protein. Cell membrane; Peripheral membrane protein. Note=Localizes primarily to the endoplasmic reticulum. Recruited to sites of contact between the endoplasmic reticulum and the cell membrane in response to increased cytosolic calcium levels.	Cell membrane
Q9UPN3	MACF1_HUMAN	reviewed	Microtubule-actin cross-linking factor 1, isoforms 1/2/3/5 (620 kDa actin-binding protein) (ABP620) (Actin cross-linking family protein 7) (Macrophin-1) (Trabeculin-alpha)	MACF1 ABP620 ACF7 KIAA0465 KIAA1251	Homo sapiens (Human)	7388	SUBCELLULAR LOCATION: Isoform 2: Cytoplasm, cytoskeleton. Cytoplasm. Golgi apparatus. Cell membrane. Cell projection, ruffle membrane. Note=The phosphorylated form is found in the cytoplasm while the non-phosphorylated form associates with the microtubules (By similarity). Localizes to the tips of microtubules. APC controls its localization to the cell membrane which is critical for its function …	Cell membrane
Q15046	SYK_HUMAN	reviewed	Lysine--tRNA ligase (EC 2.7.7.-) (EC 6.1.1.6) (Lysyl-tRNA synthetase) (LysRS)	KARS KIAA0070	Homo sapiens (Human)	597	SUBCELLULAR LOCATION: Isoform Cytoplasmic: Cytoplasm, cytosol {ECO:0000269|PubMed:10952987, ECO:0000269|PubMed:19289464, ECO:0000269|PubMed:23159739}. Cytoplasm {ECO:0000269|PubMed:15220430}. Nucleus {ECO:0000269|PubMed:15220430, ECO:0000269|PubMed:23159739}. Cell membrane {ECO:0000269|PubMed:15220430}; Peripheral membrane protein {ECO:0000269|PubMed:15220430}. Secreted {ECO:0000269|PubMed:158516…	Cell membrane
P15291	B4GT1_HUMAN	reviewed	Beta-1,4-galactosyltransferase 1 (Beta-1,4-GalTase 1) (Beta4Gal-T1) (b4Gal-T1) (EC 2.4.1.-) (UDP-Gal:beta-GlcNAc beta-1,4-galactosyltransferase 1) (UDP-galactose:beta-N-acetylglucosamine beta-1,4-galactosyltransferase 1) [Cleaved into: Processed beta-1,4-galactosyltransferase 1] [Includes: Lactose synthase A protein (EC 2.4.1.22); N-acetyllactosamine synthase (EC 2.4.1.90) (Nal synthase); Beta-N-…	B4GALT1 GGTB2	Homo sapiens (Human)	398	SUBCELLULAR LOCATION: Isoform Long: Golgi apparatus, Golgi stack membrane {ECO:0000269|PubMed:1714903}; Single-pass type II membrane protein. Cell membrane {ECO:0000269|PubMed:1714903}; Single-pass type II membrane protein. Cell surface {ECO:0000269|PubMed:1714903}. Cell projection, filopodium {ECO:0000250|UniProtKB:P15535}. Note=Found in trans cisternae of Golgi but is mainly localized at the pl…	Cell membrane
O00408	PDE2A_HUMAN	reviewed	cGMP-dependent 3',5'-cyclic phosphodiesterase (EC 3.1.4.17) (Cyclic GMP-stimulated phosphodiesterase) (CGS-PDE) (cGSPDE)	PDE2A	Homo sapiens (Human)	941	SUBCELLULAR LOCATION: Isoform PDE2A3: Cell membrane {ECO:0000269|PubMed:19632989}; Lipid-anchor {ECO:0000269|PubMed:19632989}.; SUBCELLULAR LOCATION: Isoform PDE2A2: Mitochondrion matrix {ECO:0000269|PubMed:21724846}.; SUBCELLULAR LOCATION: Isoform PDE2A1: Cytoplasm {ECO:0000269|PubMed:19632989}.; SUBCELLULAR LOCATION: Isoform 5: Mitochondrion {ECO:0000305}.	Cell membrane
P21964	COMT_HUMAN	reviewed	Catechol O-methyltransferase (EC 2.1.1.6)	COMT	Homo sapiens (Human)	271	SUBCELLULAR LOCATION: Isoform Soluble: Cytoplasm.; SUBCELLULAR LOCATION: Isoform Membrane-bound: Cell membrane; Single-pass type II membrane protein; Extracellular side {ECO:0000269|PubMed:21846718}.	Cell membrane
Q6ZRP7	QSOX2_HUMAN	reviewed	Sulfhydryl oxidase 2 (EC 1.8.3.2) (Neuroblastoma-derived sulfhydryl oxidase) (Quiescin Q6-like protein 1)	QSOX2 QSCN6L1 SOXN	Homo sapiens (Human)	698	SUBCELLULAR LOCATION: Membrane {ECO:0000269|PubMed:14633699}; Single-pass membrane protein {ECO:0000269|PubMed:14633699}. Secreted {ECO:0000269|PubMed:14633699}. Cell membrane {ECO:0000305}; Single-pass membrane protein {ECO:0000305}. Nucleus membrane {ECO:0000305}; Single-pass membrane protein {ECO:0000305}. Note=Seems to be predominantly targeted to the nuclear and outer plasma membrane.	Cell membrane
Q07021	C1QBP_HUMAN	reviewed	Complement component 1 Q subcomponent-binding protein, mitochondrial (ASF/SF2-associated protein p32) (Glycoprotein gC1qBP) (C1qBP) (Hyaluronan-binding protein 1) (Mitochondrial matrix protein p32) (gC1q-R protein) (p33)	C1QBP GC1QBP HABP1 SF2P32	Homo sapiens (Human)	282	SUBCELLULAR LOCATION: Mitochondrion matrix. Nucleus. Cell membrane; Peripheral membrane protein; Extracellular side. Secreted. Cytoplasm. Nucleus, nucleolus. Note=Seems to be predominantly localized to mitochondria. Secreted by activated lymphocytes.	Cell membrane
Q96D53	COQ8B_HUMAN	reviewed	Atypical kinase COQ8B, mitochondrial (EC 2.7.-.-) (AarF domain-containing protein kinase 4) (Coenzyme Q protein 8B)	COQ8B ADCK4	Homo sapiens (Human)	544	SUBCELLULAR LOCATION: Mitochondrion membrane {ECO:0000269|PubMed:24270420}; Single-pass membrane protein {ECO:0000269|PubMed:24270420}. Cytoplasm, cytosol {ECO:0000269|PubMed:24270420}. Cell membrane {ECO:0000269|PubMed:24270420}.	Cell membrane
Q01844	EWS_HUMAN	reviewed	RNA-binding protein EWS (EWS oncogene) (Ewing sarcoma breakpoint region 1 protein)	EWSR1 EWS	Homo sapiens (Human)	656	SUBCELLULAR LOCATION: Nucleus {ECO:0000269|PubMed:16965792}. Cytoplasm {ECO:0000269|PubMed:16965792}. Cell membrane {ECO:0000269|PubMed:16965792}. Note=Relocates from cytoplasm to ribosomes upon PTK2B/FAK2 activation.	Cell membrane
P23528	COF1_HUMAN	reviewed	Cofilin-1 (18 kDa phosphoprotein) (p18) (Cofilin, non-muscle isoform)	CFL1 CFL	Homo sapiens (Human)	166	SUBCELLULAR LOCATION: Nucleus matrix {ECO:0000269|PubMed:15580268}. Cytoplasm, cytoskeleton {ECO:0000269|PubMed:15580268}. Cell projection, ruffle membrane {ECO:0000269|PubMed:15580268}; Peripheral membrane protein {ECO:0000269|PubMed:15580268}; Cytoplasmic side {ECO:0000269|PubMed:15580268}. Cell projection, lamellipodium membrane {ECO:0000269|PubMed:15580268}; Peripheral membrane protein {ECO:0…	Cell membrane
Q14008	CKAP5_HUMAN	reviewed	Cytoskeleton-associated protein 5 (Colonic and hepatic tumor overexpressed gene protein) (Ch-TOG)	CKAP5 KIAA0097	Homo sapiens (Human)	2032	SUBCELLULAR LOCATION: Cytoplasm, cytoskeleton, microtubule organizing center, centrosome {ECO:0000269|PubMed:21646404, ECO:0000269|PubMed:25596274, ECO:0000269|PubMed:9570755}. Cytoplasm, cytoskeleton, spindle pole {ECO:0000269|PubMed:21646404}. Cytoplasm, cytoskeleton, spindle {ECO:0000269|PubMed:21297582, ECO:0000269|PubMed:25596274, ECO:0000269|PubMed:9570755}. Chromosome, centromere, kinetoch…	Cytoplasm
Q07866	KLC1_HUMAN	reviewed	Kinesin light chain 1 (KLC 1)	KLC1 KLC KNS2	Homo sapiens (Human)	573	SUBCELLULAR LOCATION: Cell projection, growth cone {ECO:0000250}. Cytoplasmic vesicle {ECO:0000250}. Cytoplasm, cytoskeleton {ECO:0000305|PubMed:14970196}.	Cytoplasm
Q13492	PICAL_HUMAN	reviewed	Phosphatidylinositol-binding clathrin assembly protein (Clathrin assembly lymphoid myeloid leukemia protein)	PICALM CALM	Homo sapiens (Human)	652	SUBCELLULAR LOCATION: Membrane, clathrin-coated pit {ECO:0000269|PubMed:10436022}. Golgi apparatus {ECO:0000269|PubMed:10436022}. Cytoplasmic vesicle, clathrin-coated vesicle {ECO:0000269|PubMed:10436022}. Nucleus {ECO:0000269|PubMed:16491119}. Note=Colocalized with clathrin in the Golgi area (PubMed:10436022). Interaction with PIMREG may target PICALM to the nucleus in some cells (PubMed:1649111…	Cytoplasm
P51692	STA5B_HUMAN	reviewed	Signal transducer and activator of transcription 5B	STAT5B	Homo sapiens (Human)	787	SUBCELLULAR LOCATION: Cytoplasm {ECO:0000250|UniProtKB:P42232}. Nucleus {ECO:0000250|UniProtKB:P42232}. Note=Translocated into the nucleus in response to phosphorylation. {ECO:0000250}.	Cytoplasm
P30838	AL3A1_HUMAN	reviewed	Aldehyde dehydrogenase, dimeric NADP-preferring (EC 1.2.1.5) (ALDHIII) (Aldehyde dehydrogenase 3) (Aldehyde dehydrogenase family 3 member A1)	ALDH3A1 ALDH3	Homo sapiens (Human)	453	SUBCELLULAR LOCATION: Cytoplasm {ECO:0000250|UniProtKB:P47739}.	Cytoplasm
Q9Y536	PAL4A_HUMAN	reviewed	Peptidyl-prolyl cis-trans isomerase A-like 4A (PPIase A-like 4A) (EC 5.2.1.8) (Chromosome one-amplified sequence 2) (COAS-2) (Cyclophilin homolog overexpressed in liver cancer)	PPIAL4A COAS2 PPIAL4B	Homo sapiens (Human)	164	SUBCELLULAR LOCATION: Cytoplasm {ECO:0000250|UniProtKB:P62937}.	Cytoplasm
Q99504	EYA3_HUMAN	reviewed	Eyes absent homolog 3 (EC 3.1.3.48)	EYA3	Homo sapiens (Human)	573	SUBCELLULAR LOCATION: Cytoplasm {ECO:0000250|UniProtKB:P97480}. Nucleus {ECO:0000269|PubMed:19234442}. Note=Localizes at sites of DNA damage at double-strand breaks (DSBs) (PubMed:19234442). With decreasing efficiency, translocalized to the nucleus by SIX2 and SIX5, and SIX4, respectively (By similarity). {ECO:0000250|UniProtKB:P97480, ECO:0000269|PubMed:19234442}.	Cytoplasm
O75962	TRIO_HUMAN	reviewed	Triple functional domain protein (EC 2.7.11.1) (PTPRF-interacting protein)	TRIO	Homo sapiens (Human)	3097	SUBCELLULAR LOCATION: Cytoplasm {ECO:0000250|UniProtKB:Q0KL02}.	Cytoplasm
Q7L576	CYFP1_HUMAN	reviewed	Cytoplasmic FMR1-interacting protein 1 (Specifically Rac1-associated protein 1) (Sra-1) (p140sra-1)	CYFIP1 KIAA0068	Homo sapiens (Human)	1253	SUBCELLULAR LOCATION: Cytoplasm {ECO:0000250|UniProtKB:Q7TMB8}. Cytoplasm, perinuclear region {ECO:0000250|UniProtKB:Q7TMB8}. Cell projection, lamellipodium {ECO:0000250|UniProtKB:Q7TMB8}. Cell projection, ruffle {ECO:0000250|UniProtKB:Q7TMB8}. Cell junction, synapse, synaptosome {ECO:0000250|UniProtKB:Q7TMB8}. Note=Highly expressed in the perinuclear region (By similarity). Enriched in synaptoso…	Cytoplasm
Q17RY0	CPEB4_HUMAN	reviewed	Cytoplasmic polyadenylation element-binding protein 4 (CPE-BP4) (CPE-binding protein 4) (hCPEB-4)	CPEB4 KIAA1673	Homo sapiens (Human)	729	SUBCELLULAR LOCATION: Cytoplasm {ECO:0000250|UniProtKB:Q7TN98}. Cell projection, dendrite {ECO:0000250|UniProtKB:Q7TN98}. Cell projection, dendritic spine {ECO:0000250|UniProtKB:Q7TN98}. Cell junction, synapse, postsynaptic cell membrane, postsynaptic density {ECO:0000250|UniProtKB:Q7TN98}. Cell projection, axon {ECO:0000250|UniProtKB:Q7TN98}. Cell projection, growth cone {ECO:0000250|UniProtKB:Q…	Cytoplasm
O95677	EYA4_HUMAN	reviewed	Eyes absent homolog 4 (EC 3.1.3.48)	EYA4	Homo sapiens (Human)	639	SUBCELLULAR LOCATION: Cytoplasm {ECO:0000250|UniProtKB:Q99502}. Nucleus {ECO:0000250|UniProtKB:Q99502}.	Cytoplasm
O95155	UBE4B_HUMAN	reviewed	Ubiquitin conjugation factor E4 B (EC 2.3.2.27) (Homozygously deleted in neuroblastoma 1) (RING-type E3 ubiquitin transferase E4 B) (Ubiquitin fusion degradation protein 2)	UBE4B HDNB1 KIAA0684 UFD2	Homo sapiens (Human)	1302	SUBCELLULAR LOCATION: Cytoplasm {ECO:0000250|UniProtKB:Q9ES00}. Nucleus {ECO:0000250|UniProtKB:Q9ES00}.	Cytoplasm
O00507	USP9Y_HUMAN	reviewed	Probable ubiquitin carboxyl-terminal hydrolase FAF-Y (EC 3.4.19.12) (Deubiquitinating enzyme FAF-Y) (Fat facets protein-related, Y-linked) (Ubiquitin thioesterase FAF-Y) (Ubiquitin-specific protease 9, Y chromosome) (Ubiquitin-specific-processing protease FAF-Y)	USP9Y DFFRY	Homo sapiens (Human)	2555	SUBCELLULAR LOCATION: Cytoplasm {ECO:0000250}.	Cytoplasm
P46926	GNPI1_HUMAN	reviewed	Glucosamine-6-phosphate isomerase 1 (EC 3.5.99.6) (Glucosamine-6-phosphate deaminase 1) (GNPDA 1) (GlcN6P deaminase 1) (Oscillin)	GNPDA1 GNPI HLN KIAA0060	Homo sapiens (Human)	289	SUBCELLULAR LOCATION: Cytoplasm {ECO:0000250}.	Cytoplasm
P49189	AL9A1_HUMAN	reviewed	4-trimethylaminobutyraldehyde dehydrogenase (TMABADH) (EC 1.2.1.47) (Aldehyde dehydrogenase E3 isozyme) (Aldehyde dehydrogenase family 9 member A1) (EC 1.2.1.3) (Gamma-aminobutyraldehyde dehydrogenase) (EC 1.2.1.19) (R-aminobutyraldehyde dehydrogenase) [Cleaved into: 4-trimethylaminobutyraldehyde dehydrogenase, N-terminally processed]	ALDH9A1 ALDH4 ALDH7 ALDH9	Homo sapiens (Human)	494	SUBCELLULAR LOCATION: Cytoplasm {ECO:0000250}.	Cytoplasm
Q15181	IPYR_HUMAN	reviewed	Inorganic pyrophosphatase (EC 3.6.1.1) (Pyrophosphate phospho-hydrolase) (PPase)	PPA1 IOPPP PP	Homo sapiens (Human)	289	SUBCELLULAR LOCATION: Cytoplasm {ECO:0000250}.	Cytoplasm
Q66LE6	2ABD_HUMAN	reviewed	Serine/threonine-protein phosphatase 2A 55 kDa regulatory subunit B delta isoform (PP2A subunit B isoform B55-delta) (PP2A subunit B isoform PR55-delta) (PP2A subunit B isoform R2-delta) (PP2A subunit B isoform delta)	PPP2R2D KIAA1541	Homo sapiens (Human)	453	SUBCELLULAR LOCATION: Cytoplasm {ECO:0000250}.	Cytoplasm
Q8TDQ7	GNPI2_HUMAN	reviewed	Glucosamine-6-phosphate isomerase 2 (EC 3.5.99.6) (Glucosamine-6-phosphate deaminase 2) (GNPDA 2) (GlcN6P deaminase 2) (Glucosamine-6-phosphate isomerase SB52)	GNPDA2 GNP2	Homo sapiens (Human)	276	SUBCELLULAR LOCATION: Cytoplasm {ECO:0000250}.	Cytoplasm
Q96FW1	OTUB1_HUMAN	reviewed	Ubiquitin thioesterase OTUB1 (EC 3.4.19.12) (Deubiquitinating enzyme OTUB1) (OTU domain-containing ubiquitin aldehyde-binding protein 1) (Otubain-1) (hOTU1) (Ubiquitin-specific-processing protease OTUB1)	OTUB1 OTB1 OTU1 HSPC263	Homo sapiens (Human)	271	SUBCELLULAR LOCATION: Cytoplasm {ECO:0000250}.	Cytoplasm
Q9NQW7	XPP1_HUMAN	reviewed	Xaa-Pro aminopeptidase 1 (EC 3.4.11.9) (Aminoacylproline aminopeptidase) (Cytosolic aminopeptidase P) (Soluble aminopeptidase P) (sAmp) (X-Pro aminopeptidase 1) (X-prolyl aminopeptidase 1, soluble)	XPNPEP1 XPNPEPL XPNPEPL1	Homo sapiens (Human)	623	SUBCELLULAR LOCATION: Cytoplasm {ECO:0000250}.	Cytoplasm
Q9Y4P1	ATG4B_HUMAN	reviewed	Cysteine protease ATG4B (EC 3.4.22.-) (AUT-like 1 cysteine endopeptidase) (Autophagin-1) (Autophagy-related cysteine endopeptidase 1) (Autophagy-related protein 4 homolog B) (hAPG4B)	ATG4B APG4B AUTL1 KIAA0943	Homo sapiens (Human)	393	SUBCELLULAR LOCATION: Cytoplasm {ECO:0000250}.	Cytoplasm
P48739	PIPNB_HUMAN	reviewed	Phosphatidylinositol transfer protein beta isoform (PI-TP-beta) (PtdIns transfer protein beta) (PtdInsTP beta)	PITPNB	Homo sapiens (Human)	271	SUBCELLULAR LOCATION: Cytoplasm {ECO:0000250}. Golgi apparatus {ECO:0000250}.	Cytoplasm
Q8N6T3	ARFG1_HUMAN	reviewed	ADP-ribosylation factor GTPase-activating protein 1 (ARF GAP 1) (ADP-ribosylation factor 1 GTPase-activating protein) (ARF1 GAP) (ARF1-directed GTPase-activating protein)	ARFGAP1 ARF1GAP	Homo sapiens (Human)	406	SUBCELLULAR LOCATION: Cytoplasm {ECO:0000250}. Golgi apparatus {ECO:0000250}. Note=Associates with the Golgi complex. {ECO:0000250}.	Cytoplasm
O14579	COPE_HUMAN	reviewed	Coatomer subunit epsilon (Epsilon-coat protein) (Epsilon-COP)	COPE	Homo sapiens (Human)	308	SUBCELLULAR LOCATION: Cytoplasm {ECO:0000250}. Golgi apparatus membrane {ECO:0000250}; Peripheral membrane protein {ECO:0000250}; Cytoplasmic side {ECO:0000250}. Cytoplasmic vesicle, COPI-coated vesicle membrane {ECO:0000250}; Peripheral membrane protein {ECO:0000250}; Cytoplasmic side {ECO:0000250}. Note=The coatomer is cytoplasmic or polymerized on the cytoplasmic side of the Golgi, as well as …	Cytoplasm
Q6XZF7	DNMBP_HUMAN	reviewed	Dynamin-binding protein (Scaffold protein Tuba)	DNMBP KIAA1010	Homo sapiens (Human)	1577	SUBCELLULAR LOCATION: Cytoplasm {ECO:0000250}. Golgi apparatus, Golgi stack {ECO:0000250}. Cytoplasm, cytoskeleton {ECO:0000250}. Cell junction, synapse {ECO:0000250}. Note=Localized to synapses and Golgi stacks. {ECO:0000250}.	Cytoplasm
Q8IWB6	TEX14_HUMAN	reviewed	Inactive serine/threonine-protein kinase TEX14 (Protein kinase-like protein SgK307) (Sugen kinase 307) (Testis-expressed sequence 14) (Testis-expressed sequence 14 protein)	TEX14 SGK307	Homo sapiens (Human)	1497	SUBCELLULAR LOCATION: Cytoplasm {ECO:0000250}. Midbody {ECO:0000250}. Chromosome, centromere, kinetochore {ECO:0000250}. Note=Detected in the intercellular bridges that connect male germ cell daughter cells after cell division. {ECO:0000250}.	Cytoplasm
Q13057	COASY_HUMAN	reviewed	Bifunctional coenzyme A synthase (CoA synthase) (NBP) (POV-2) [Includes: Phosphopantetheine adenylyltransferase (EC 2.7.7.3) (Dephospho-CoA pyrophosphorylase) (Pantetheine-phosphate adenylyltransferase) (PPAT); Dephospho-CoA kinase (DPCK) (EC 2.7.1.24) (Dephosphocoenzyme A kinase) (DPCOAK)]	COASY PSEC0106	Homo sapiens (Human)	564	SUBCELLULAR LOCATION: Cytoplasm {ECO:0000250}. Mitochondrion matrix {ECO:0000269|PubMed:24360804}. Note=The protein is mainly present in the mitochondrial matrix, probably anchored to the inner mitochondrial membrane, but is also present in cell lysate.	Cytoplasm
O00629	IMA3_HUMAN	reviewed	Importin subunit alpha-3 (Importin alpha Q1) (Qip1) (Karyopherin subunit alpha-4)	KPNA4 QIP1	Homo sapiens (Human)	521	SUBCELLULAR LOCATION: Cytoplasm {ECO:0000250}. Nucleus {ECO:0000250}.	Cytoplasm
O14787	TNPO2_HUMAN	reviewed	Transportin-2 (Karyopherin beta-2b)	TNPO2	Homo sapiens (Human)	897	SUBCELLULAR LOCATION: Cytoplasm {ECO:0000250}. Nucleus {ECO:0000250}.	Cytoplasm
O60518	RNBP6_HUMAN	reviewed	Ran-binding protein 6 (RanBP6)	RANBP6	Homo sapiens (Human)	1105	SUBCELLULAR LOCATION: Cytoplasm {ECO:0000250}. Nucleus {ECO:0000250}.	Cytoplasm
P45985	MP2K4_HUMAN	reviewed	Dual specificity mitogen-activated protein kinase kinase 4 (MAP kinase kinase 4) (MAPKK 4) (EC 2.7.12.2) (JNK-activating kinase 1) (MAPK/ERK kinase 4) (MEK 4) (SAPK/ERK kinase 1) (SEK1) (Stress-activated protein kinase kinase 1) (SAPK kinase 1) (SAPKK-1) (SAPKK1) (c-Jun N-terminal kinase kinase 1) (JNKK)	MAP2K4 JNKK1 MEK4 MKK4 PRKMK4 SEK1 SERK1 SKK1	Homo sapiens (Human)	399	SUBCELLULAR LOCATION: Cytoplasm {ECO:0000250}. Nucleus {ECO:0000250}.	Cytoplasm
P62333	PRS10_HUMAN	reviewed	26S proteasome regulatory subunit 10B (26S proteasome AAA-ATPase subunit RPT4) (Proteasome 26S subunit ATPase 6) (Proteasome subunit p42)	PSMC6 SUG2	Homo sapiens (Human)	389	SUBCELLULAR LOCATION: Cytoplasm {ECO:0000250}. Nucleus {ECO:0000250}.	Cytoplasm
Q8TAA3	PSA7L_HUMAN	reviewed	Proteasome subunit alpha type-7-like (EC 3.4.25.1)	PSMA8 PSMA7L	Homo sapiens (Human)	256	SUBCELLULAR LOCATION: Cytoplasm {ECO:0000250}. Nucleus {ECO:0000250}.	Cytoplasm
Q9BTT0	AN32E_HUMAN	reviewed	Acidic leucine-rich nuclear phosphoprotein 32 family member E (LANP-like protein) (LANP-L)	ANP32E	Homo sapiens (Human)	268	SUBCELLULAR LOCATION: Cytoplasm {ECO:0000250}. Nucleus {ECO:0000250}.	Cytoplasm
Q01085	TIAR_HUMAN	reviewed	Nucleolysin TIAR (TIA-1-related protein)	TIAL1	Homo sapiens (Human)	375	SUBCELLULAR LOCATION: Cytoplasm {ECO:0000250}. Nucleus {ECO:0000250}. Cytoplasmic granule. Note=The cytoplasmic granules are stress granules which are a dense aggregation in the cytosol composed of proteins and RNAs that appear when the cell is under stress. Colocalizes with NANOS3 in the stress granules (By similarity). Cytoplasmic granules of cytolytic T-lymphocytes. {ECO:0000250}.	Cytoplasm
P50616	TOB1_HUMAN	reviewed	Protein Tob1 (Transducer of erbB-2 1)	TOB1 TOB TROB1	Homo sapiens (Human)	345	SUBCELLULAR LOCATION: Cytoplasm {ECO:0000250}. Nucleus {ECO:0000250}. Note=Only a small fraction localizes to the cytoplasm except in late S-phase where more than half of proteins become cytoplasmic. {ECO:0000250}.	Cytoplasm
Q9BTC0	DIDO1_HUMAN	reviewed	Death-inducer obliterator 1 (DIO-1) (hDido1) (Death-associated transcription factor 1) (DATF-1)	DIDO1 C20orf158 DATF1 KIAA0333	Homo sapiens (Human)	2240	SUBCELLULAR LOCATION: Cytoplasm {ECO:0000250}. Nucleus {ECO:0000255|PROSITE-ProRule:PRU00651}. Cytoplasm, cytoskeleton, spindle {ECO:0000269|PubMed:23831028}. Note=Translocates to the nucleus after pro-apoptotic stimuli (By similarity). Translocates to the mitotic spindle upon loss of interaction with H3K4me3 during early mitosis. {ECO:0000250}.	Cytoplasm
Q9NUU7	DD19A_HUMAN	reviewed	ATP-dependent RNA helicase DDX19A (EC 3.6.4.13) (DDX19-like protein) (DEAD box protein 19A)	DDX19A DDX19L	Homo sapiens (Human)	478	SUBCELLULAR LOCATION: Cytoplasm {ECO:0000250}. Nucleus, nuclear pore complex. Nucleus membrane {ECO:0000250}; Peripheral membrane protein {ECO:0000250}; Cytoplasmic side {ECO:0000250}. Note=Nuclear pore complex cytoplasmic fibrils.	Cytoplasm
P55884	EIF3B_HUMAN	reviewed	Eukaryotic translation initiation factor 3 subunit B (eIF3b) (Eukaryotic translation initiation factor 3 subunit 9) (Prt1 homolog) (hPrt1) (eIF-3-eta) (eIF3 p110) (eIF3 p116)	EIF3B EIF3S9	Homo sapiens (Human)	814	SUBCELLULAR LOCATION: Cytoplasm {ECO:0000255|HAMAP-Rule:MF_03001}.	Cytoplasm
O00303	EIF3F_HUMAN	reviewed	Eukaryotic translation initiation factor 3 subunit F (eIF3f) (Deubiquitinating enzyme eIF3f) (EC 3.4.19.12) (Eukaryotic translation initiation factor 3 subunit 5) (eIF-3-epsilon) (eIF3 p47)	EIF3F EIF3S5	Homo sapiens (Human)	357	SUBCELLULAR LOCATION: Cytoplasm {ECO:0000255|HAMAP-Rule:MF_03005}.	Cytoplasm
O75822	EIF3J_HUMAN	reviewed	Eukaryotic translation initiation factor 3 subunit J (eIF3j) (Eukaryotic translation initiation factor 3 subunit 1) (eIF-3-alpha) (eIF3 p35)	EIF3J EIF3S1 PRO0391	Homo sapiens (Human)	258	SUBCELLULAR LOCATION: Cytoplasm {ECO:0000255|HAMAP-Rule:MF_03009}.	Cytoplasm
Q9Y262	EIF3L_HUMAN	reviewed	Eukaryotic translation initiation factor 3 subunit L (eIF3l) (Eukaryotic translation initiation factor 3 subunit 6-interacting protein) (Eukaryotic translation initiation factor 3 subunit E-interacting protein)	EIF3L EIF3EIP EIF3S6IP HSPC021 HSPC025 MSTP005	Homo sapiens (Human)	564	SUBCELLULAR LOCATION: Cytoplasm {ECO:0000255|HAMAP-Rule:MF_03011}.	Cytoplasm
Q16719	KYNU_HUMAN	reviewed	Kynureninase (EC 3.7.1.3) (L-kynurenine hydrolase)	KYNU	Homo sapiens (Human)	465	SUBCELLULAR LOCATION: Cytoplasm {ECO:0000255|HAMAP-Rule:MF_03017, ECO:0000269|PubMed:8706755}.	Cytoplasm
Q7Z478	DHX29_HUMAN	reviewed	ATP-dependent RNA helicase DHX29 (EC 3.6.4.13) (DEAH box protein 29) (Nucleic acid helicase DDXx)	DHX29 DDX29	Homo sapiens (Human)	1369	SUBCELLULAR LOCATION: Cytoplasm {ECO:0000255|HAMAP-Rule:MF_03068}.	Cytoplasm
Q9NTK5	OLA1_HUMAN	reviewed	Obg-like ATPase 1 (DNA damage-regulated overexpressed in cancer 45) (DOC45) (GTP-binding protein 9)	OLA1 GTPBP9 PRO2455 PTD004	Homo sapiens (Human)	396	SUBCELLULAR LOCATION: Cytoplasm {ECO:0000255|HAMAP-Rule:MF_03167, ECO:0000269|PubMed:20053727}. Nucleus {ECO:0000255|HAMAP-Rule:MF_03167, ECO:0000269|PubMed:20053727}. Nucleus, nucleolus {ECO:0000255|HAMAP-Rule:MF_03167, ECO:0000269|PubMed:20053727}. Note=Predominantly cytoplasmic, shuttles between the nucleus and the cytoplasm. {ECO:0000255|HAMAP-Rule:MF_03167}.	Cytoplasm
P50579	MAP2_HUMAN	reviewed	Methionine aminopeptidase 2 (MAP 2) (MetAP 2) (EC 3.4.11.18) (Initiation factor 2-associated 67 kDa glycoprotein) (p67) (p67eIF2) (Peptidase M)	METAP2 MNPEP P67EIF2	Homo sapiens (Human)	478	SUBCELLULAR LOCATION: Cytoplasm {ECO:0000255|HAMAP-Rule:MF_03175, ECO:0000269|PubMed:21537465}. Note=About 30% of expressed METAP2 associates with polysomes.	Cytoplasm
P17858	PFKAL_HUMAN	reviewed	ATP-dependent 6-phosphofructokinase, liver type (ATP-PFK) (PFK-L) (EC 2.7.1.11) (6-phosphofructokinase type B) (Phosphofructo-1-kinase isozyme B) (PFK-B) (Phosphohexokinase)	PFKL	Homo sapiens (Human)	780	SUBCELLULAR LOCATION: Cytoplasm {ECO:0000255|HAMAP-Rule:MF_03184}.	Cytoplasm
A4D210	A4D210_HUMAN	unreviewed	Eukaryotic translation initiation factor 3 subunit B (eIF3b) (Eukaryotic translation initiation factor 3 subunit 9) (eIF-3-eta)	EIF3S9 EIF3B hCG_1998988 tcag7.544	Homo sapiens (Human)	775	SUBCELLULAR LOCATION: Cytoplasm {ECO:0000256|HAMAP-Rule:MF_03001, ECO:0000256|PIRNR:PIRNR036424, ECO:0000256|SAAS:SAAS00045160}.	Cytoplasm
B4DV79	B4DV79_HUMAN	unreviewed	Eukaryotic translation initiation factor 3 subunit B (eIF3b) (Eukaryotic translation initiation factor 3 subunit 9) (eIF-3-eta)	EIF3B EIF3S9	Homo sapiens (Human)	738	SUBCELLULAR LOCATION: Cytoplasm {ECO:0000256|HAMAP-Rule:MF_03001, ECO:0000256|PIRNR:PIRNR036424, ECO:0000256|SAAS:SAAS00045160}.	Cytoplasm
B4DXN6	B4DXN6_HUMAN	unreviewed	Eukaryotic translation initiation factor 3 subunit B (eIF3b) (Eukaryotic translation initiation factor 3 subunit 9) (eIF-3-eta)	EIF3B EIF3S9	Homo sapiens (Human)	661	SUBCELLULAR LOCATION: Cytoplasm {ECO:0000256|HAMAP-Rule:MF_03001, ECO:0000256|PIRNR:PIRNR036424, ECO:0000256|SAAS:SAAS00045160}.	Cytoplasm
B3KSH1	B3KSH1_HUMAN	unreviewed	Eukaryotic translation initiation factor 3 subunit F (eIF3f) (Eukaryotic translation initiation factor 3 subunit 5) (eIF-3-epsilon) (eIF3 p47)	EIF3F EIF3S5 hCG_1784554	Homo sapiens (Human)	372	SUBCELLULAR LOCATION: Cytoplasm {ECO:0000256|HAMAP-Rule:MF_03005, ECO:0000256|SAAS:SAAS00721305}.	Cytoplasm
B4DMT5	B4DMT5_HUMAN	unreviewed	Eukaryotic translation initiation factor 3 subunit F (eIF3f) (Eukaryotic translation initiation factor 3 subunit 5) (eIF-3-epsilon) (eIF3 p47)	EIF3F EIF3S5	Homo sapiens (Human)	307	SUBCELLULAR LOCATION: Cytoplasm {ECO:0000256|HAMAP-Rule:MF_03005, ECO:0000256|SAAS:SAAS00721305}.	Cytoplasm
B0QY89	B0QY89_HUMAN	unreviewed	Eukaryotic translation initiation factor 3 subunit L (eIF3l) (Eukaryotic translation initiation factor 3 subunit 6-interacting protein) (Eukaryotic translation initiation factor 3 subunit E-interacting protein)	EIF3L EIF3EIP EIF3S6IP	Homo sapiens (Human)	607	SUBCELLULAR LOCATION: Cytoplasm {ECO:0000256|HAMAP-Rule:MF_03011}.	Cytoplasm
B0QY90	B0QY90_HUMAN	unreviewed	Eukaryotic translation initiation factor 3 subunit L (eIF3l) (Eukaryotic translation initiation factor 3 subunit 6-interacting protein) (Eukaryotic translation initiation factor 3 subunit E-interacting protein)	EIF3L EIF3EIP EIF3S6IP hCG_41840	Homo sapiens (Human)	466	SUBCELLULAR LOCATION: Cytoplasm {ECO:0000256|HAMAP-Rule:MF_03011}.	Cytoplasm
B3KPB9	B3KPB9_HUMAN	unreviewed	Eukaryotic translation initiation factor 3 subunit L (eIF3l) (Eukaryotic translation initiation factor 3 subunit 6-interacting protein) (Eukaryotic translation initiation factor 3 subunit E-interacting protein)	EIF3L EIF3EIP EIF3S6IP	Homo sapiens (Human)	607	SUBCELLULAR LOCATION: Cytoplasm {ECO:0000256|HAMAP-Rule:MF_03011}.	Cytoplasm
B4DQF6	B4DQF6_HUMAN	unreviewed	Eukaryotic translation initiation factor 3 subunit L (eIF3l) (Eukaryotic translation initiation factor 3 subunit 6-interacting protein) (Eukaryotic translation initiation factor 3 subunit E-interacting protein)	EIF3L EIF3EIP EIF3S6IP	Homo sapiens (Human)	531	SUBCELLULAR LOCATION: Cytoplasm {ECO:0000256|HAMAP-Rule:MF_03011}.	Cytoplasm
A8K4D5	A8K4D5_HUMAN	unreviewed	Kynureninase (EC 3.7.1.3) (L-kynurenine hydrolase)	KYNU	Homo sapiens (Human)	465	SUBCELLULAR LOCATION: Cytoplasm {ECO:0000256|HAMAP-Rule:MF_03017, ECO:0000256|PIRNR:PIRNR038800}.	Cytoplasm
A8K7T0	A8K7T0_HUMAN	unreviewed	Kynureninase (EC 3.7.1.3) (L-kynurenine hydrolase)	KYNU	Homo sapiens (Human)	465	SUBCELLULAR LOCATION: Cytoplasm {ECO:0000256|HAMAP-Rule:MF_03017, ECO:0000256|PIRNR:PIRNR038800}.	Cytoplasm
A0A087WYN9	A0A087WYN9_HUMAN	unreviewed	ATP-dependent RNA helicase DHX29 (EC 3.6.4.13) (DEAH box protein 29)	DHX29	Homo sapiens (Human)	1370	SUBCELLULAR LOCATION: Cytoplasm {ECO:0000256|HAMAP-Rule:MF_03068}.	Cytoplasm
B4E1L0	B4E1L0_HUMAN	unreviewed	Adenylosuccinate synthetase isozyme 2 (AMPSase 2) (AdSS 2) (EC 6.3.4.4) (Adenylosuccinate synthetase, acidic isozyme) (Adenylosuccinate synthetase, liver isozyme) (L-type adenylosuccinate synthetase) (IMP--aspartate ligase 2)	ADSS ADSS2	Homo sapiens (Human)	435	SUBCELLULAR LOCATION: Cytoplasm {ECO:0000256|HAMAP-Rule:MF_03127}.	Cytoplasm
A0A140CZL4	A0A140CZL4_HUMAN	unreviewed	S-methyl-5'-thioadenosine phosphorylase (EC 2.4.2.28) (5'-methylthioadenosine phosphorylase) (MTA phosphorylase) (MTAP) (MTAPase)	MTAP-ANRIL fusion MTAP	Homo sapiens (Human)	274	SUBCELLULAR LOCATION: Cytoplasm {ECO:0000256|HAMAP-Rule:MF_03155}. Nucleus {ECO:0000256|HAMAP-Rule:MF_03155}.	Cytoplasm
A0A140CZL5	A0A140CZL5_HUMAN	unreviewed	Purine nucleoside phosphorylase (PNP) (EC 2.4.2.1)	MTAP-ANRIL fusion	Homo sapiens (Human)	233	SUBCELLULAR LOCATION: Cytoplasm {ECO:0000256|HAMAP-Rule:MF_03155}. Nucleus {ECO:0000256|HAMAP-Rule:MF_03155}.	Cytoplasm
A0A140CZL6	A0A140CZL6_HUMAN	unreviewed	Purine nucleoside phosphorylase (PNP) (EC 2.4.2.1)	MTAP-ANRIL fusion	Homo sapiens (Human)	233	SUBCELLULAR LOCATION: Cytoplasm {ECO:0000256|HAMAP-Rule:MF_03155}. Nucleus {ECO:0000256|HAMAP-Rule:MF_03155}.	Cytoplasm
B4DUC8	B4DUC8_HUMAN	unreviewed	S-methyl-5'-thioadenosine phosphorylase (EC 2.4.2.28) (5'-methylthioadenosine phosphorylase) (MTA phosphorylase) (MTAP) (MTAPase)	MTAP	Homo sapiens (Human)	300	SUBCELLULAR LOCATION: Cytoplasm {ECO:0000256|HAMAP-Rule:MF_03155}. Nucleus {ECO:0000256|HAMAP-Rule:MF_03155}.	Cytoplasm
J3QSB7	J3QSB7_HUMAN	unreviewed	Purine nucleoside phosphorylase (PNP) (EC 2.4.2.1)	MTAP	Homo sapiens (Human)	242	SUBCELLULAR LOCATION: Cytoplasm {ECO:0000256|HAMAP-Rule:MF_03155}. Nucleus {ECO:0000256|HAMAP-Rule:MF_03155}.	Cytoplasm
Q05DJ2	Q05DJ2_HUMAN	unreviewed	Purine nucleoside phosphorylase (PNP) (EC 2.4.2.1)	MTAP	Homo sapiens (Human)	242	SUBCELLULAR LOCATION: Cytoplasm {ECO:0000256|HAMAP-Rule:MF_03155}. Nucleus {ECO:0000256|HAMAP-Rule:MF_03155}.	Cytoplasm
Q6FHT1	Q6FHT1_HUMAN	unreviewed	S-methyl-5'-thioadenosine phosphorylase (EC 2.4.2.28) (5'-methylthioadenosine phosphorylase) (MTA phosphorylase) (MTAP) (MTAPase)	MTAP HEL-249	Homo sapiens (Human)	283	SUBCELLULAR LOCATION: Cytoplasm {ECO:0000256|HAMAP-Rule:MF_03155}. Nucleus {ECO:0000256|HAMAP-Rule:MF_03155}.	Cytoplasm
J3KQ32	J3KQ32_HUMAN	unreviewed	Obg-like ATPase 1	OLA1	Homo sapiens (Human)	416	SUBCELLULAR LOCATION: Cytoplasm {ECO:0000256|HAMAP-Rule:MF_03167}. Nucleus {ECO:0000256|HAMAP-Rule:MF_03167}. Nucleus, nucleolus {ECO:0000256|HAMAP-Rule:MF_03167}. Note=Predominantly cytoplasmic, shuttles between the nucleus and the cytoplasm. {ECO:0000256|HAMAP-Rule:MF_03167}.	Cytoplasm
B2RDD7	B2RDD7_HUMAN	unreviewed	Protein arginine N-methyltransferase 5 (EC 2.1.1.-)		Homo sapiens (Human)	637	SUBCELLULAR LOCATION: Cytoplasm {ECO:0000256|PIRNR:PIRNR015894}.; SUBCELLULAR LOCATION: Nucleus {ECO:0000256|PIRNR:PIRNR015894}.	Cytoplasm
Q7Z4Z1	Q7Z4Z1_HUMAN	unreviewed	Coatomer subunit epsilon		Homo sapiens (Human)	307	SUBCELLULAR LOCATION: Cytoplasm {ECO:0000256|PIRNR:PIRNR016478}.	Cytoplasm
A0A075B6F9	A0A075B6F9_HUMAN	unreviewed	Nitric oxide synthase-interacting protein	NOSIP	Homo sapiens (Human)	304	SUBCELLULAR LOCATION: Cytoplasm {ECO:0000256|PIRNR:PIRNR023577}. Nucleus {ECO:0000256|PIRNR:PIRNR023577}.	Cytoplasm
A8K670	A8K670_HUMAN	unreviewed	Nitric oxide synthase-interacting protein		Homo sapiens (Human)	301	SUBCELLULAR LOCATION: Cytoplasm {ECO:0000256|PIRNR:PIRNR023577}. Nucleus {ECO:0000256|PIRNR:PIRNR023577}.	Cytoplasm
B3KND4	B3KND4_HUMAN	unreviewed	Coatomer subunit gamma		Homo sapiens (Human)	681	SUBCELLULAR LOCATION: Cytoplasm {ECO:0000256|PIRNR:PIRNR037093}. Golgi apparatus membrane {ECO:0000256|PIRNR:PIRNR037093}; Peripheral membrane protein {ECO:0000256|PIRNR:PIRNR037093}; Cytoplasmic side {ECO:0000256|PIRNR:PIRNR037093}. Cytoplasmic vesicle, COPI-coated vesicle membrane {ECO:0000256|PIRNR:PIRNR037093}; Peripheral membrane protein {ECO:0000256|PIRNR:PIRNR037093}; Cytoplasmic side {ECO…	Cytoplasm
Q9H9B7	Q9H9B7_HUMAN	unreviewed	Coatomer subunit gamma		Homo sapiens (Human)	799	SUBCELLULAR LOCATION: Cytoplasm {ECO:0000256|PIRNR:PIRNR037093}. Golgi apparatus membrane {ECO:0000256|PIRNR:PIRNR037093}; Peripheral membrane protein {ECO:0000256|PIRNR:PIRNR037093}; Cytoplasmic side {ECO:0000256|PIRNR:PIRNR037093}. Cytoplasmic vesicle, COPI-coated vesicle membrane {ECO:0000256|PIRNR:PIRNR037093}; Peripheral membrane protein {ECO:0000256|PIRNR:PIRNR037093}; Cytoplasmic side {ECO…	Cytoplasm
Q05DH1	Q05DH1_HUMAN	unreviewed	Proteasome subunit alpha type (EC 3.4.25.1) (Fragment)	PSMA7	Homo sapiens (Human)	238	SUBCELLULAR LOCATION: Cytoplasm {ECO:0000256|RuleBase:RU000551}. Nucleus {ECO:0000256|RuleBase:RU000551}.	Cytoplasm
A0A0K0K1K4	A0A0K0K1K4_HUMAN	unreviewed	Proteasome subunit alpha type (EC 3.4.25.1)	HEL-S-276	Homo sapiens (Human)	248	SUBCELLULAR LOCATION: Cytoplasm {ECO:0000256|RuleBase:RU000551}. Nucleus {ECO:0000256|RuleBase:RU000551}.; SUBCELLULAR LOCATION: Nucleus {ECO:0000256|SAAS:SAAS00594407}.	Cytoplasm
B0YJ74	B0YJ74_HUMAN	unreviewed	Proteasome subunit alpha type (EC 3.4.25.1)	PSMA8	Homo sapiens (Human)	212	SUBCELLULAR LOCATION: Cytoplasm {ECO:0000256|RuleBase:RU000551}. Nucleus {ECO:0000256|RuleBase:RU000551}.; SUBCELLULAR LOCATION: Nucleus {ECO:0000256|SAAS:SAAS00594407}.	Cytoplasm
H0UI83	H0UI83_HUMAN	unreviewed	Proteasome subunit alpha type (EC 3.4.25.1)	hCG_41772	Homo sapiens (Human)	166	SUBCELLULAR LOCATION: Cytoplasm {ECO:0000256|RuleBase:RU000551}. Nucleus {ECO:0000256|RuleBase:RU000551}.; SUBCELLULAR LOCATION: Nucleus {ECO:0000256|SAAS:SAAS00594407}.	Cytoplasm
Q6IB71	Q6IB71_HUMAN	unreviewed	Proteasome subunit alpha type (EC 3.4.25.1)	PSMA3	Homo sapiens (Human)	255	SUBCELLULAR LOCATION: Cytoplasm {ECO:0000256|RuleBase:RU000551}. Nucleus {ECO:0000256|RuleBase:RU000551}.; SUBCELLULAR LOCATION: Nucleus {ECO:0000256|SAAS:SAAS00594407}.	Cytoplasm
A8K4S9	A8K4S9_HUMAN	unreviewed	Signal transducer and activator of transcription		Homo sapiens (Human)	847	SUBCELLULAR LOCATION: Cytoplasm {ECO:0000256|RuleBase:RU046415}.; SUBCELLULAR LOCATION: Nucleus {ECO:0000256|RuleBase:RU046415}.	Cytoplasm
B2R680	B2R680_HUMAN	unreviewed	Signal transducer and activator of transcription		Homo sapiens (Human)	847	SUBCELLULAR LOCATION: Cytoplasm {ECO:0000256|RuleBase:RU046415}.; SUBCELLULAR LOCATION: Nucleus {ECO:0000256|RuleBase:RU046415}.	Cytoplasm
B4DNP0	B4DNP0_HUMAN	unreviewed	Signal transducer and activator of transcription		Homo sapiens (Human)	672	SUBCELLULAR LOCATION: Cytoplasm {ECO:0000256|RuleBase:RU046415}.; SUBCELLULAR LOCATION: Nucleus {ECO:0000256|RuleBase:RU046415}.	Cytoplasm
B4DQB3	B4DQB3_HUMAN	unreviewed	Signal transducer and activator of transcription		Homo sapiens (Human)	737	SUBCELLULAR LOCATION: Cytoplasm {ECO:0000256|RuleBase:RU046415}.; SUBCELLULAR LOCATION: Nucleus {ECO:0000256|RuleBase:RU046415}.	Cytoplasm
B4DVR6	B4DVR6_HUMAN	unreviewed	Signal transducer and activator of transcription		Homo sapiens (Human)	699	SUBCELLULAR LOCATION: Cytoplasm {ECO:0000256|RuleBase:RU046415}.; SUBCELLULAR LOCATION: Nucleus {ECO:0000256|RuleBase:RU046415}.	Cytoplasm
B5BTZ6	B5BTZ6_HUMAN	unreviewed	Signal transducer and activator of transcription	STAT3	Homo sapiens (Human)	769	SUBCELLULAR LOCATION: Cytoplasm {ECO:0000256|RuleBase:RU046415}.; SUBCELLULAR LOCATION: Nucleus {ECO:0000256|RuleBase:RU046415}.	Cytoplasm
B7ZA24	B7ZA24_HUMAN	unreviewed	Signal transducer and activator of transcription		Homo sapiens (Human)	699	SUBCELLULAR LOCATION: Cytoplasm {ECO:0000256|RuleBase:RU046415}.; SUBCELLULAR LOCATION: Nucleus {ECO:0000256|RuleBase:RU046415}.	Cytoplasm
B7ZAC1	B7ZAC1_HUMAN	unreviewed	Signal transducer and activator of transcription		Homo sapiens (Human)	737	SUBCELLULAR LOCATION: Cytoplasm {ECO:0000256|RuleBase:RU046415}.; SUBCELLULAR LOCATION: Nucleus {ECO:0000256|RuleBase:RU046415}.	Cytoplasm
G8JLH9	G8JLH9_HUMAN	unreviewed	Signal transducer and activator of transcription	STAT3	Homo sapiens (Human)	672	SUBCELLULAR LOCATION: Cytoplasm {ECO:0000256|RuleBase:RU046415}.; SUBCELLULAR LOCATION: Nucleus {ECO:0000256|RuleBase:RU046415}.	Cytoplasm
J3KPM9	J3KPM9_HUMAN	unreviewed	Signal transducer and activator of transcription	STAT1	Homo sapiens (Human)	714	SUBCELLULAR LOCATION: Cytoplasm {ECO:0000256|RuleBase:RU046415}.; SUBCELLULAR LOCATION: Nucleus {ECO:0000256|RuleBase:RU046415}.	Cytoplasm
Q59H39	Q59H39_HUMAN	unreviewed	Signal transducer and activator of transcription (Fragment)		Homo sapiens (Human)	788	SUBCELLULAR LOCATION: Cytoplasm {ECO:0000256|RuleBase:RU046415}.; SUBCELLULAR LOCATION: Nucleus {ECO:0000256|RuleBase:RU046415}.	Cytoplasm
Q9BQD2	Q9BQD2_HUMAN	unreviewed	Signal transducer and activator of transcription		Homo sapiens (Human)	679	SUBCELLULAR LOCATION: Cytoplasm {ECO:0000256|RuleBase:RU046415}.; SUBCELLULAR LOCATION: Nucleus {ECO:0000256|RuleBase:RU046415}.	Cytoplasm
A0A140VK27	A0A140VK27_HUMAN	unreviewed	Leukotriene A(4) hydrolase (LTA-4 hydrolase) (EC 3.3.2.6)		Homo sapiens (Human)	611	SUBCELLULAR LOCATION: Cytoplasm {ECO:0000256|RuleBase:RU361141}.	Cytoplasm
B4DVZ8	B4DVZ8_HUMAN	unreviewed	Leukotriene A(4) hydrolase (LTA-4 hydrolase) (EC 3.3.2.6)		Homo sapiens (Human)	561	SUBCELLULAR LOCATION: Cytoplasm {ECO:0000256|RuleBase:RU361141}.	Cytoplasm
B7Z5N5	B7Z5N5_HUMAN	unreviewed	Mothers against decapentaplegic homolog (MAD homolog) (Mothers against DPP homolog) (SMAD family member)	SMAD2	Homo sapiens (Human)	431	SUBCELLULAR LOCATION: Cytoplasm {ECO:0000256|RuleBase:RU361195}. Nucleus {ECO:0000256|RuleBase:RU361195}.; SUBCELLULAR LOCATION: Nucleus {ECO:0000256|SAAS:SAAS00573677}.	Cytoplasm
A8K3S1	A8K3S1_HUMAN	unreviewed	Glucosamine-6-phosphate isomerase (EC 3.5.99.6) (Glucosamine-6-phosphate deaminase)		Homo sapiens (Human)	289	SUBCELLULAR LOCATION: Cytoplasm {ECO:0000256|RuleBase:RU361197}.	Cytoplasm
D6R9P4	D6R9P4_HUMAN	unreviewed	Glucosamine-6-phosphate isomerase (EC 3.5.99.6) (Glucosamine-6-phosphate deaminase)	GNPDA1	Homo sapiens (Human)	274	SUBCELLULAR LOCATION: Cytoplasm {ECO:0000256|RuleBase:RU361197}.	Cytoplasm
D6RAY7	D6RAY7_HUMAN	unreviewed	Glucosamine-6-phosphate isomerase (EC 3.5.99.6) (Glucosamine-6-phosphate deaminase) (Fragment)	GNPDA1	Homo sapiens (Human)	237	SUBCELLULAR LOCATION: Cytoplasm {ECO:0000256|RuleBase:RU361197}.	Cytoplasm
D6RB13	D6RB13_HUMAN	unreviewed	Glucosamine-6-phosphate isomerase (EC 3.5.99.6) (Glucosamine-6-phosphate deaminase) (Fragment)	GNPDA1	Homo sapiens (Human)	160	SUBCELLULAR LOCATION: Cytoplasm {ECO:0000256|RuleBase:RU361197}.	Cytoplasm
A0A140VJJ2	A0A140VJJ2_HUMAN	unreviewed	S-formylglutathione hydrolase (EC 3.1.2.12)	ESD hCG_29992	Homo sapiens (Human)	282	SUBCELLULAR LOCATION: Cytoplasm {ECO:0000256|RuleBase:RU363068}.	Cytoplasm
H7BZT7	H7BZT7_HUMAN	unreviewed	S-formylglutathione hydrolase (EC 3.1.2.12) (Fragment)	ESD	Homo sapiens (Human)	230	SUBCELLULAR LOCATION: Cytoplasm {ECO:0000256|RuleBase:RU363068}.	Cytoplasm
X6RA14	X6RA14_HUMAN	unreviewed	S-formylglutathione hydrolase (EC 3.1.2.12)	ESD	Homo sapiens (Human)	253	SUBCELLULAR LOCATION: Cytoplasm {ECO:0000256|RuleBase:RU363068}.	Cytoplasm
B4DL29	B4DL29_HUMAN	unreviewed	Cysteine protease (EC 3.4.22.-)		Homo sapiens (Human)	319	SUBCELLULAR LOCATION: Cytoplasm {ECO:0000256|RuleBase:RU363115, ECO:0000256|SAAS:SAAS00570686}.	Cytoplasm
B4DNY2	B4DNY2_HUMAN	unreviewed	Cysteine protease (EC 3.4.22.-)		Homo sapiens (Human)	379	SUBCELLULAR LOCATION: Cytoplasm {ECO:0000256|RuleBase:RU363115, ECO:0000256|SAAS:SAAS00570686}.	Cytoplasm
B4DZK0	B4DZK0_HUMAN	unreviewed	Cysteine protease (EC 3.4.22.-)		Homo sapiens (Human)	510	SUBCELLULAR LOCATION: Cytoplasm {ECO:0000256|RuleBase:RU363115, ECO:0000256|SAAS:SAAS00570686}.	Cytoplasm
B7ZA52	B7ZA52_HUMAN	unreviewed	Cysteine protease (EC 3.4.22.-)		Homo sapiens (Human)	319	SUBCELLULAR LOCATION: Cytoplasm {ECO:0000256|RuleBase:RU363115, ECO:0000256|SAAS:SAAS00570686}.	Cytoplasm
C9JIK8	C9JIK8_HUMAN	unreviewed	Cysteine protease (EC 3.4.22.-) (Fragment)	ATG4B	Homo sapiens (Human)	219	SUBCELLULAR LOCATION: Cytoplasm {ECO:0000256|RuleBase:RU363115, ECO:0000256|SAAS:SAAS00570686}.	Cytoplasm
H7C2A6	H7C2A6_HUMAN	unreviewed	Cysteine protease (EC 3.4.22.-) (Fragment)	ATG4B	Homo sapiens (Human)	193	SUBCELLULAR LOCATION: Cytoplasm {ECO:0000256|RuleBase:RU363115, ECO:0000256|SAAS:SAAS00570686}.	Cytoplasm
Q5SX86	Q5SX86_HUMAN	unreviewed	Rab GDP dissociation inhibitor (Fragment)	GDI2	Homo sapiens (Human)	155	SUBCELLULAR LOCATION: Cytoplasm {ECO:0000256|RuleBase:RU363124}.	Cytoplasm
Q5SX90	Q5SX90_HUMAN	unreviewed	Rab GDP dissociation inhibitor (Fragment)	GDI2	Homo sapiens (Human)	148	SUBCELLULAR LOCATION: Cytoplasm {ECO:0000256|RuleBase:RU363124}.	Cytoplasm
Q8TB95	Q8TB95_HUMAN	unreviewed	Rab GDP dissociation inhibitor (Fragment)		Homo sapiens (Human)	188	SUBCELLULAR LOCATION: Cytoplasm {ECO:0000256|RuleBase:RU363124}.	Cytoplasm
V9GYF8	V9GYF8_HUMAN	unreviewed	Rab GDP dissociation inhibitor (Fragment)	GDI2	Homo sapiens (Human)	130	SUBCELLULAR LOCATION: Cytoplasm {ECO:0000256|RuleBase:RU363124}.	Cytoplasm
V9GYJ7	V9GYJ7_HUMAN	unreviewed	Rab GDP dissociation inhibitor (Fragment)	GDI2	Homo sapiens (Human)	125	SUBCELLULAR LOCATION: Cytoplasm {ECO:0000256|RuleBase:RU363124}.	Cytoplasm
B4DDS7	B4DDS7_HUMAN	unreviewed	Signal recognition particle 54 kDa protein	SRP54	Homo sapiens (Human)	466	SUBCELLULAR LOCATION: Cytoplasm {ECO:0000256|RuleBase:RU364034}.	Cytoplasm
G3V4F7	G3V4F7_HUMAN	unreviewed	Signal recognition particle 54 kDa protein	SRP54	Homo sapiens (Human)	440	SUBCELLULAR LOCATION: Cytoplasm {ECO:0000256|RuleBase:RU364034}.	Cytoplasm
Q96G38	Q96G38_HUMAN	unreviewed	Eukaryotic translation initiation factor 3 subunit B (Fragment)	EIF3B	Homo sapiens (Human)	622	SUBCELLULAR LOCATION: Cytoplasm {ECO:0000256|SAAS:SAAS00045160}.	Cytoplasm
E5RHS5	E5RHS5_HUMAN	unreviewed	Eukaryotic translation initiation factor 3 subunit E (Fragment)	EIF3E	Homo sapiens (Human)	226	SUBCELLULAR LOCATION: Cytoplasm {ECO:0000256|SAAS:SAAS00545126}.	Cytoplasm
E5RIT4	E5RIT4_HUMAN	unreviewed	Eukaryotic translation initiation factor 3 subunit E (Fragment)	EIF3E	Homo sapiens (Human)	75	SUBCELLULAR LOCATION: Cytoplasm {ECO:0000256|SAAS:SAAS00545126}.	Cytoplasm
A0A0G2JS82	A0A0G2JS82_HUMAN	unreviewed	AP-2 complex subunit alpha-2 (Fragment)	AP2A2	Homo sapiens (Human)	917	SUBCELLULAR LOCATION: Cytoplasm {ECO:0000256|SAAS:SAAS00556307}.	Cytoplasm
A0A140VJE7	A0A140VJE7_HUMAN	unreviewed	Testicular tissue protein Li 21		Homo sapiens (Human)	825	SUBCELLULAR LOCATION: Cytoplasm {ECO:0000256|SAAS:SAAS00556307}.	Cytoplasm
B3KW21	B3KW21_HUMAN	unreviewed	cDNA FLJ41945 fis, clone PLACE6019676, highly similar to Coatomer subunit gamma		Homo sapiens (Human)	610	SUBCELLULAR LOCATION: Cytoplasm {ECO:0000256|SAAS:SAAS00556307}.	Cytoplasm
B3KXW5	B3KXW5_HUMAN	unreviewed	cDNA FLJ46199 fis, clone TESTI4007965, highly similar to AP-1 complex subunit gamma-1		Homo sapiens (Human)	845	SUBCELLULAR LOCATION: Cytoplasm {ECO:0000256|SAAS:SAAS00556307}.	Cytoplasm
B4DDL1	B4DDL1_HUMAN	unreviewed	Uncharacterized protein		Homo sapiens (Human)	351	SUBCELLULAR LOCATION: Cytoplasm {ECO:0000256|SAAS:SAAS00556307}.	Cytoplasm
B4DIL5	B4DIL5_HUMAN	unreviewed	cDNA FLJ54516, highly similar to Adapter-relatedprotein complex 2 beta-1 subunit		Homo sapiens (Human)	340	SUBCELLULAR LOCATION: Cytoplasm {ECO:0000256|SAAS:SAAS00556307}.	Cytoplasm
B7Z1Q4	B7Z1Q4_HUMAN	unreviewed	cDNA FLJ57955, highly similar to Adapter-relatedprotein complex 2 alpha- 2 subunit		Homo sapiens (Human)	678	SUBCELLULAR LOCATION: Cytoplasm {ECO:0000256|SAAS:SAAS00556307}.	Cytoplasm
B7Z5S9	B7Z5S9_HUMAN	unreviewed	cDNA FLJ61359, highly similar to Adapter-relatedprotein complex 2 alpha- 2 subunit		Homo sapiens (Human)	930	SUBCELLULAR LOCATION: Cytoplasm {ECO:0000256|SAAS:SAAS00556307}.	Cytoplasm
Q8IY97	Q8IY97_HUMAN	unreviewed	Adaptor-related protein complex 1, gamma 1 subunit	AP1G1	Homo sapiens (Human)	825	SUBCELLULAR LOCATION: Cytoplasm {ECO:0000256|SAAS:SAAS00556307}.	Cytoplasm
Q8N9K4	Q8N9K4_HUMAN	unreviewed	cDNA FLJ36998 fis, clone BRACE2007295, highly similar to ALPHA-ADAPTIN A		Homo sapiens (Human)	482	SUBCELLULAR LOCATION: Cytoplasm {ECO:0000256|SAAS:SAAS00556307}.	Cytoplasm
Q8WUI6	Q8WUI6_HUMAN	unreviewed	COPG protein (Fragment)	COPG	Homo sapiens (Human)	699	SUBCELLULAR LOCATION: Cytoplasm {ECO:0000256|SAAS:SAAS00556307}.	Cytoplasm
Q9NUP3	Q9NUP3_HUMAN	unreviewed	cDNA FLJ11224 fis, clone PLACE1008273, moderately similar to COATOMER GAMMA SUBUNIT		Homo sapiens (Human)	483	SUBCELLULAR LOCATION: Cytoplasm {ECO:0000256|SAAS:SAAS00556307}.	Cytoplasm
B3KWL6	B3KWL6_HUMAN	unreviewed	cDNA FLJ43306 fis, clone NT2NE2006909, highly similar to Methionine aminopeptidase 2 (EC 3.4.11.18)		Homo sapiens (Human)	328	SUBCELLULAR LOCATION: Cytoplasm {ECO:0000256|SAAS:SAAS00637290}.	Cytoplasm
G3V1U3	G3V1U3_HUMAN	unreviewed	Methionine aminopeptidase 2 (Methionyl aminopeptidase 2, isoform CRA_c)	METAP2 hCG_2015111	Homo sapiens (Human)	328	SUBCELLULAR LOCATION: Cytoplasm {ECO:0000256|SAAS:SAAS00637290}.	Cytoplasm
A0A024R7P5	A0A024R7P5_HUMAN	unreviewed	Similar to Laminin receptor 1, isoform CRA_a	LOC388524 hCG_20807	Homo sapiens (Human)	199	SUBCELLULAR LOCATION: Cytoplasm {ECO:0000256|SAAS:SAAS00721596}.	Cytoplasm
C9J9K3	C9J9K3_HUMAN	unreviewed	40S ribosomal protein SA (Fragment)	RPSA	Homo sapiens (Human)	263	SUBCELLULAR LOCATION: Cytoplasm {ECO:0000256|SAAS:SAAS00721596}.	Cytoplasm
B4DEE5	B4DEE5_HUMAN	unreviewed	Arsenical pump-driving ATPase (EC 3.6.-.-)		Homo sapiens (Human)	320	SUBCELLULAR LOCATION: Cytoplasm {ECO:0000256|SAAS:SAAS00846969}.; SUBCELLULAR LOCATION: Endoplasmic reticulum {ECO:0000256|SAAS:SAAS00846961}.	Cytoplasm
K7ERW9	K7ERW9_HUMAN	unreviewed	Arsenical pump-driving ATPase (EC 3.6.-.-) (Fragment)	ASNA1	Homo sapiens (Human)	200	SUBCELLULAR LOCATION: Cytoplasm {ECO:0000256|SAAS:SAAS00846969}.; SUBCELLULAR LOCATION: Endoplasmic reticulum {ECO:0000256|SAAS:SAAS00846961}.	Cytoplasm
Q96F07	CYFP2_HUMAN	reviewed	Cytoplasmic FMR1-interacting protein 2 (p53-inducible protein 121)	CYFIP2 KIAA1168 PIR121	Homo sapiens (Human)	1278	SUBCELLULAR LOCATION: Cytoplasm {ECO:0000269|PubMed:10449408, ECO:0000269|PubMed:17245118}. Nucleus {ECO:0000269|PubMed:17245118}. Cytoplasm, perinuclear region {ECO:0000250|UniProtKB:Q5SQX6}. Cell junction, synapse, synaptosome {ECO:0000250|UniProtKB:Q5SQX6}. Note=Highly expressed in the perinuclear regionand enriched in synaptosomes (By similarity). Treatment with leptomycin-B triggers transloc…	Cytoplasm
Q6XE24	RBMS3_HUMAN	reviewed	RNA-binding motif, single-stranded-interacting protein 3	RBMS3	Homo sapiens (Human)	437	SUBCELLULAR LOCATION: Cytoplasm {ECO:0000269|PubMed:10675610}.	Cytoplasm
Q92888	ARHG1_HUMAN	reviewed	Rho guanine nucleotide exchange factor 1 (115 kDa guanine nucleotide exchange factor) (p115-RhoGEF) (p115RhoGEF) (Sub1.5)	ARHGEF1	Homo sapiens (Human)	912	SUBCELLULAR LOCATION: Cytoplasm {ECO:0000269|PubMed:10747909}. Membrane {ECO:0000269|PubMed:10747909}. Note=Translocated to the membrane by activated GNA13 or LPA stimulation.	Cytoplasm
Q8IWX8	CHERP_HUMAN	reviewed	Calcium homeostasis endoplasmic reticulum protein (ERPROT 213-21) (SR-related CTD-associated factor 6)	CHERP DAN26 SCAF6	Homo sapiens (Human)	916	SUBCELLULAR LOCATION: Cytoplasm {ECO:0000269|PubMed:10794731, ECO:0000269|PubMed:12656674, ECO:0000269|PubMed:8010949}. Cytoplasm, perinuclear region {ECO:0000269|PubMed:10794731, ECO:0000269|PubMed:12656674, ECO:0000269|PubMed:8010949}. Endoplasmic reticulum {ECO:0000269|PubMed:10794731, ECO:0000269|PubMed:12656674, ECO:0000269|PubMed:8010949}. Note=Distributed throughout the cytoplasm and also …	Cytoplasm
Q9UI26	IPO11_HUMAN	reviewed	Importin-11 (Imp11) (Ran-binding protein 11) (RanBP11)	IPO11 RANBP11	Homo sapiens (Human)	975	SUBCELLULAR LOCATION: Cytoplasm {ECO:0000269|PubMed:11032817}. Nucleus {ECO:0000269|PubMed:11032817}.	Cytoplasm
Q9Y678	COPG1_HUMAN	reviewed	Coatomer subunit gamma-1 (Gamma-1-coat protein) (Gamma-1-COP)	COPG1 COPG	Homo sapiens (Human)	874	SUBCELLULAR LOCATION: Cytoplasm {ECO:0000269|PubMed:11056392}. Golgi apparatus membrane {ECO:0000269|PubMed:11056392}; Peripheral membrane protein {ECO:0000269|PubMed:11056392}; Cytoplasmic side {ECO:0000269|PubMed:11056392}. Cytoplasmic vesicle, COPI-coated vesicle membrane {ECO:0000250}; Peripheral membrane protein {ECO:0000250}; Cytoplasmic side {ECO:0000250}. Note=The coatomer is cytoplasmic …	Cytoplasm
Q9BTT6	LRRC1_HUMAN	reviewed	Leucine-rich repeat-containing protein 1 (LANO adapter protein) (LAP and no PDZ protein)	LRRC1 LANO	Homo sapiens (Human)	524	SUBCELLULAR LOCATION: Cytoplasm {ECO:0000269|PubMed:11440998}. Membrane {ECO:0000269|PubMed:11440998}; Peripheral membrane protein {ECO:0000269|PubMed:11440998}. Note=Localized at the basolateral side of epithelial cells.	Cytoplasm
Q99615	DNJC7_HUMAN	reviewed	DnaJ homolog subfamily C member 7 (Tetratricopeptide repeat protein 2) (TPR repeat protein 2)	DNAJC7 TPR2 TTC2	Homo sapiens (Human)	494	SUBCELLULAR LOCATION: Cytoplasm {ECO:0000269|PubMed:11573955, ECO:0000269|PubMed:12853476}. Nucleus {ECO:0000269|PubMed:11573955}. Cytoplasm, cytoskeleton {ECO:0000250|UniProtKB:Q9QYI3}. Note=Colocalizes with NR1I3 to microtubules. {ECO:0000250|UniProtKB:Q9QYI3}.	Cytoplasm
Q969S3	ZN622_HUMAN	reviewed	Zinc finger protein 622 (Zinc finger-like protein 9)	ZNF622 ZPR9	Homo sapiens (Human)	477	SUBCELLULAR LOCATION: Cytoplasm {ECO:0000269|PubMed:11802789}. Nucleus {ECO:0000269|PubMed:11802789}.	Cytoplasm
P41743	KPCI_HUMAN	reviewed	Protein kinase C iota type (EC 2.7.11.13) (Atypical protein kinase C-lambda/iota) (PRKC-lambda/iota) (aPKC-lambda/iota) (nPKC-iota)	PRKCI DXS1179E	Homo sapiens (Human)	596	SUBCELLULAR LOCATION: Cytoplasm {ECO:0000269|PubMed:11891849, ECO:0000269|PubMed:15695176, ECO:0000269|PubMed:9566925}. Membrane {ECO:0000269|PubMed:16452474}. Endosome {ECO:0000269|PubMed:9566925}. Nucleus {ECO:0000269|PubMed:11891849, ECO:0000269|PubMed:15695176}. Note=Transported into the endosome through interaction with SQSTM1/p62. After phosphorylation by SRC, transported into the nucleus t…	Cytoplasm
P25788	PSA3_HUMAN	reviewed	Proteasome subunit alpha type-3 (EC 3.4.25.1) (Macropain subunit C8) (Multicatalytic endopeptidase complex subunit C8) (Proteasome component C8)	PSMA3 HC8 PSC8	Homo sapiens (Human)	255	SUBCELLULAR LOCATION: Cytoplasm {ECO:0000269|PubMed:12181345}. Nucleus {ECO:0000269|PubMed:12181345}.	Cytoplasm
Q96CS3	FAF2_HUMAN	reviewed	FAS-associated factor 2 (Protein ETEA) (UBX domain-containing protein 3B) (UBX domain-containing protein 8)	FAF2 ETEA KIAA0887 UBXD8 UBXN3B	Homo sapiens (Human)	445	SUBCELLULAR LOCATION: Cytoplasm {ECO:0000269|PubMed:12372427}. Lipid droplet {ECO:0000269|PubMed:19773358, ECO:0000269|PubMed:23297223}. Endoplasmic reticulum {ECO:0000269|PubMed:18711132, ECO:0000269|PubMed:23297223}.	Cytoplasm
Q15814	TBCC_HUMAN	reviewed	Tubulin-specific chaperone C (Tubulin-folding cofactor C) (CFC)	TBCC	Homo sapiens (Human)	346	SUBCELLULAR LOCATION: Cytoplasm {ECO:0000269|PubMed:12417528}. Note=Detected predominantly in the photoreceptor connecting cilium.	Cytoplasm
Q9BQG0	MBB1A_HUMAN	reviewed	Myb-binding protein 1A	MYBBP1A P160	Homo sapiens (Human)	1328	SUBCELLULAR LOCATION: Cytoplasm {ECO:0000269|PubMed:12429849}. Nucleus {ECO:0000269|PubMed:12429849}. Nucleus, nucleolus {ECO:0000269|PubMed:12429849}. Note=Shuttles between the nucleus and cytoplasm. Nuclear import may be mediated by KPNA2, while export appears to depend partially on XPO1/CRM1 (By similarity). Predominantly nucleolar. {ECO:0000250|UniProtKB:Q7TPV4}.	Cytoplasm
Q96KP4	CNDP2_HUMAN	reviewed	Cytosolic non-specific dipeptidase (EC 3.4.13.18) (CNDP dipeptidase 2) (Carnosine dipeptidase II) (Epididymis secretory protein Li 13) (Glutamate carboxypeptidase-like protein 1) (Peptidase A)	CNDP2 CN2 CPGL HEL-S-13 PEPA	Homo sapiens (Human)	475	SUBCELLULAR LOCATION: Cytoplasm {ECO:0000269|PubMed:12473676, ECO:0000269|PubMed:17121880}.	Cytoplasm
Q8NC51	PAIRB_HUMAN	reviewed	Plasminogen activator inhibitor 1 RNA-binding protein (PAI1 RNA-binding protein 1) (PAI-RBP1) (SERPINE1 mRNA-binding protein 1)	SERBP1 PAIRBP1 CGI-55	Homo sapiens (Human)	408	SUBCELLULAR LOCATION: Cytoplasm {ECO:0000269|PubMed:12505151}. Nucleus {ECO:0000269|PubMed:12505151}. Cytoplasm, perinuclear region {ECO:0000269|PubMed:12505151}. Note=Also found in perinuclear regions.	Cytoplasm
O43264	ZW10_HUMAN	reviewed	Centromere/kinetochore protein zw10 homolog	ZW10	Homo sapiens (Human)	779	SUBCELLULAR LOCATION: Cytoplasm {ECO:0000269|PubMed:15029241}. Endoplasmic reticulum membrane {ECO:0000269|PubMed:15029241}; Peripheral membrane protein {ECO:0000269|PubMed:15029241}. Chromosome, centromere, kinetochore {ECO:0000269|PubMed:11590237, ECO:0000269|PubMed:15485811, ECO:0000269|PubMed:15824131}. Cytoplasm, cytoskeleton, spindle {ECO:0000269|PubMed:11590237}. Note=Dynamic pattern of lo…	Cytoplasm
O00506	STK25_HUMAN	reviewed	Serine/threonine-protein kinase 25 (EC 2.7.11.1) (Ste20-like kinase) (Sterile 20/oxidant stress-response kinase 1) (SOK-1) (Ste20/oxidant stress response kinase 1)	STK25 SOK1 YSK1	Homo sapiens (Human)	426	SUBCELLULAR LOCATION: Cytoplasm {ECO:0000269|PubMed:15037601}. Golgi apparatus {ECO:0000269|PubMed:15037601}. Note=Localizes to the Golgi apparatus.	Cytoplasm
P42224	STAT1_HUMAN	reviewed	Signal transducer and activator of transcription 1-alpha/beta (Transcription factor ISGF-3 components p91/p84)	STAT1	Homo sapiens (Human)	750	SUBCELLULAR LOCATION: Cytoplasm {ECO:0000269|PubMed:15322115}. Nucleus {ECO:0000269|PubMed:15322115}. Note=Translocated into the nucleus upon tyrosine phosphorylation and dimerization, in response to IFN-gamma and signaling by activated FGFR1, FGFR2, FGFR3 or FGFR4.	Cytoplasm
Q9NXR7	BABA2_HUMAN	reviewed	BRISC and BRCA1-A complex member 2 (BRCA1-A complex subunit BRE) (BRCA1/BRCA2-containing complex subunit 45) (Brain and reproductive organ-expressed protein)	BABAM2 BRCC45 BRE	Homo sapiens (Human)	383	SUBCELLULAR LOCATION: Cytoplasm {ECO:0000269|PubMed:15465831, ECO:0000269|PubMed:24075985}. Nucleus {ECO:0000269|PubMed:15465831, ECO:0000269|PubMed:19261748, ECO:0000269|PubMed:24075985}. Note=Localizes at sites of DNA damage at double-strand breaks (DSBs). {ECO:0000269|PubMed:19261748}.	Cytoplasm
O60664	PLIN3_HUMAN	reviewed	Perilipin-3 (47 kDa mannose 6-phosphate receptor-binding protein) (47 kDa MPR-binding protein) (Cargo selection protein TIP47) (Mannose-6-phosphate receptor-binding protein 1) (Placental protein 17) (PP17)	PLIN3 M6PRBP1 TIP47	Homo sapiens (Human)	434	SUBCELLULAR LOCATION: Cytoplasm {ECO:0000269|PubMed:15545278, ECO:0000269|PubMed:9590177}. Endosome membrane {ECO:0000305}; Peripheral membrane protein {ECO:0000305}; Cytoplasmic side {ECO:0000305}. Lipid droplet {ECO:0000305}. Note=Membrane associated on endosomes. Detected in the envelope and the core of lipid bodies and in lipid sails.	Cytoplasm
Q9Y314	NOSIP_HUMAN	reviewed	Nitric oxide synthase-interacting protein (E3 ubiquitin-protein ligase NOSIP) (EC 2.3.2.27) (RING-type E3 ubiquitin transferase NOSIP) (eNOS-interacting protein)	NOSIP CGI-25	Homo sapiens (Human)	301	SUBCELLULAR LOCATION: Cytoplasm {ECO:0000269|PubMed:15548660, ECO:0000269|PubMed:16135813}. Nucleus {ECO:0000269|PubMed:15548660, ECO:0000269|PubMed:16135813}. Note=Translocates from nucleus to cytoplasm in the G2 phase of the cell cycle (PubMed:16135813).	Cytoplasm
Q05193	DYN1_HUMAN	reviewed	Dynamin-1 (EC 3.6.5.5)	DNM1 DNM	Homo sapiens (Human)	864	SUBCELLULAR LOCATION: Cytoplasm {ECO:0000269|PubMed:15703209}. Cytoplasm, cytoskeleton {ECO:0000269|PubMed:15703209}. Note=Microtubule-associated.	Cytoplasm
P48634	PRC2A_HUMAN	reviewed	Protein PRRC2A (HLA-B-associated transcript 2) (Large proline-rich protein BAT2) (Proline-rich and coiled-coil-containing protein 2A) (Protein G2)	PRRC2A BAT2 G2	Homo sapiens (Human)	2157	SUBCELLULAR LOCATION: Cytoplasm {ECO:0000269|PubMed:15752841}. Nucleus {ECO:0000269|PubMed:15752841}.	Cytoplasm
Q15019	SEPT2_HUMAN	reviewed	Septin-2 (Neural precursor cell expressed developmentally down-regulated protein 5) (NEDD-5)	SEPT2 DIFF6 KIAA0158 NEDD5	Homo sapiens (Human)	361	SUBCELLULAR LOCATION: Cytoplasm {ECO:0000269|PubMed:15774761}. Cytoplasm, cytoskeleton {ECO:0000269|PubMed:15774761}. Cytoplasm, cytoskeleton, spindle {ECO:0000269|PubMed:15774761}. Chromosome, centromere, kinetochore {ECO:0000269|PubMed:15774761}. Cleavage furrow {ECO:0000269|PubMed:15774761}. Midbody {ECO:0000269|PubMed:15774761}. Cytoplasm, cell cortex {ECO:0000269|PubMed:15774761}. Cell proje…	Cytoplasm
P25685	DNJB1_HUMAN	reviewed	DnaJ homolog subfamily B member 1 (DnaJ protein homolog 1) (Heat shock 40 kDa protein 1) (HSP40) (Heat shock protein 40) (Human DnaJ protein 1) (hDj-1)	DNAJB1 DNAJ1 HDJ1 HSPF1	Homo sapiens (Human)	340	SUBCELLULAR LOCATION: Cytoplasm {ECO:0000269|PubMed:1586970}. Nucleus {ECO:0000269|PubMed:1586970}. Nucleus, nucleolus {ECO:0000269|PubMed:1586970}. Note=Translocates rapidly from the cytoplasm to the nucleus, and especially to the nucleoli, upon heat shock.	Cytoplasm
Q9UMX0	UBQL1_HUMAN	reviewed	Ubiquilin-1 (Protein linking IAP with cytoskeleton 1) (PLIC-1) (hPLIC-1)	UBQLN1 DA41 PLIC1	Homo sapiens (Human)	589	SUBCELLULAR LOCATION: Cytoplasm {ECO:0000269|PubMed:16159959, ECO:0000269|PubMed:23979357}. Nucleus {ECO:0000269|PubMed:23979357}. Endoplasmic reticulum {ECO:0000269|PubMed:19822669}. Cytoplasmic vesicle, autophagosome {ECO:0000269|PubMed:19148225, ECO:0000269|PubMed:20529957, ECO:0000269|PubMed:21143716, ECO:0000269|PubMed:21695056, ECO:0000269|PubMed:23307288, ECO:0000269|PubMed:23459205}. Cell…	Cytoplasm
P23396	RS3_HUMAN	reviewed	40S ribosomal protein S3 (EC 4.2.99.18) (Small ribosomal subunit protein uS3)	RPS3 OK/SW-cl.26	Homo sapiens (Human)	243	SUBCELLULAR LOCATION: Cytoplasm {ECO:0000269|PubMed:16314389, ECO:0000269|PubMed:17289661, ECO:0000269|PubMed:17560175, ECO:0000269|PubMed:18045535, ECO:0000269|PubMed:20217897, ECO:0000269|PubMed:21871177}. Nucleus {ECO:0000269|PubMed:17560175, ECO:0000269|PubMed:18045535, ECO:0000269|PubMed:19460357, ECO:0000269|PubMed:20217897, ECO:0000269|PubMed:21871177}. Nucleus, nucleolus {ECO:0000269|PubM…	Cytoplasm
Q9C0E2	XPO4_HUMAN	reviewed	Exportin-4 (Exp4)	XPO4 KIAA1721	Homo sapiens (Human)	1151	SUBCELLULAR LOCATION: Cytoplasm {ECO:0000269|PubMed:16449645}. Nucleus {ECO:0000269|PubMed:16449645}. Note=Shuttles between the nucleus and the cytoplasm.	Cytoplasm
P40818	UBP8_HUMAN	reviewed	Ubiquitin carboxyl-terminal hydrolase 8 (EC 3.4.19.12) (Deubiquitinating enzyme 8) (Ubiquitin isopeptidase Y) (hUBPy) (Ubiquitin thioesterase 8) (Ubiquitin-specific-processing protease 8)	USP8 KIAA0055 UBPY	Homo sapiens (Human)	1118	SUBCELLULAR LOCATION: Cytoplasm {ECO:0000269|PubMed:16520378, ECO:0000269|PubMed:17711858, ECO:0000269|PubMed:19427866}. Nucleus {ECO:0000250|UniProtKB:Q80U87}. Endosome membrane {ECO:0000269|PubMed:16520378, ECO:0000269|PubMed:17711858}; Peripheral membrane protein {ECO:0000305}. Cell membrane {ECO:0000269|PubMed:16520378}; Peripheral membrane protein {ECO:0000305}.	Cytoplasm
O43765	SGTA_HUMAN	reviewed	Small glutamine-rich tetratricopeptide repeat-containing protein alpha (Alpha-SGT) (Vpu-binding protein) (UBP)	SGTA SGT SGT1	Homo sapiens (Human)	313	SUBCELLULAR LOCATION: Cytoplasm {ECO:0000269|PubMed:16580629}. Nucleus {ECO:0000269|PubMed:16580629}. Note=Co-localizes with HSP90AB1 in the cytoplasm. Increased nuclear accumulation seen during cell apoptosis. {ECO:0000269|PubMed:16580629}.	Cytoplasm
Q15796	SMAD2_HUMAN	reviewed	Mothers against decapentaplegic homolog 2 (MAD homolog 2) (Mothers against DPP homolog 2) (JV18-1) (Mad-related protein 2) (hMAD-2) (SMAD family member 2) (SMAD 2) (Smad2) (hSMAD2)	SMAD2 MADH2 MADR2	Homo sapiens (Human)	467	SUBCELLULAR LOCATION: Cytoplasm {ECO:0000269|PubMed:16751101, ECO:0000269|PubMed:19289081, ECO:0000269|PubMed:9865696}. Nucleus {ECO:0000269|PubMed:16751101, ECO:0000269|PubMed:19289081, ECO:0000269|PubMed:21599657, ECO:0000269|PubMed:22781750, ECO:0000269|PubMed:9865696}. Note=Cytoplasmic and nuclear in the absence of TGF-beta. On TGF-beta stimulation, migrates to the nucleus when complexed with…	Cytoplasm
O00743	PPP6_HUMAN	reviewed	Serine/threonine-protein phosphatase 6 catalytic subunit (PP6C) (EC 3.1.3.16) [Cleaved into: Serine/threonine-protein phosphatase 6 catalytic subunit, N-terminally processed]	PPP6C PPP6	Homo sapiens (Human)	305	SUBCELLULAR LOCATION: Cytoplasm {ECO:0000269|PubMed:16769727, ECO:0000269|PubMed:17568194}.	Cytoplasm
O95905	ECD_HUMAN	reviewed	Protein ecdysoneless homolog (Human suppressor of GCR two) (hSGT1)	ECD	Homo sapiens (Human)	644	SUBCELLULAR LOCATION: Cytoplasm {ECO:0000269|PubMed:16849563, ECO:0000269|PubMed:19919181, ECO:0000269|PubMed:26711270}. Nucleus {ECO:0000269|PubMed:16849563, ECO:0000269|PubMed:19919181, ECO:0000269|PubMed:26711270}. Note=Predominantly is located in the cytoplasm. {ECO:0000269|PubMed:16849563, ECO:0000269|PubMed:19919181, ECO:0000269|PubMed:26711270}.	Cytoplasm
Q8WUX9	CHMP7_HUMAN	reviewed	Charged multivesicular body protein 7 (Chromatin-modifying protein 7)	CHMP7	Homo sapiens (Human)	453	SUBCELLULAR LOCATION: Cytoplasm {ECO:0000269|PubMed:16856878}. Nucleus envelope {ECO:0000269|PubMed:26040712}. Note=Diffused localization, with some punctate distribution, especially in the perinuclear area (PubMed:16856878). Localizes to the nucleus envelope during late anaphase (PubMed:26040712). {ECO:0000269|PubMed:16856878, ECO:0000269|PubMed:26040712}.	Cytoplasm
P10155	RO60_HUMAN	reviewed	60 kDa SS-A/Ro ribonucleoprotein (60 kDa Ro protein) (60 kDa ribonucleoprotein Ro) (RoRNP) (Ro 60 kDa autoantigen) (Sjoegren syndrome antigen A2) (Sjoegren syndrome type A antigen) (SS-A) (TROVE domain family member 2)	TROVE2 RO60 SSA2	Homo sapiens (Human)	538	SUBCELLULAR LOCATION: Cytoplasm {ECO:0000269|PubMed:17289661}. Note=Localized in cytoplasmic mRNP granules containing untranslated mRNAs.	Cytoplasm
P62701	RS4X_HUMAN	reviewed	40S ribosomal protein S4, X isoform (SCR10) (Single copy abundant mRNA protein) (Small ribosomal subunit protein eS4)	RPS4X CCG2 RPS4 SCAR	Homo sapiens (Human)	263	SUBCELLULAR LOCATION: Cytoplasm {ECO:0000269|PubMed:17289661}. Note=Localized in cytoplasmic mRNP granules containing untranslated mRNAs.	Cytoplasm
Q9P289	STK26_HUMAN	reviewed	Serine/threonine-protein kinase 26 (EC 2.7.11.1) (MST3 and SOK1-related kinase) (Mammalian STE20-like protein kinase 4) (MST-4) (STE20-like kinase MST4) (Serine/threonine-protein kinase MASK)	STK26 MASK MST4	Homo sapiens (Human)	416	SUBCELLULAR LOCATION: Cytoplasm {ECO:0000269|PubMed:17360971, ECO:0000269|PubMed:27807006}. Golgi apparatus {ECO:0000269|PubMed:15037601, ECO:0000269|PubMed:27807006}. Note=Colocalized with RIPOR1 in the Golgi of serum-starved cells and relocated to cytoplasmic punctae, probably vesicular compartments, along with RIPOR1 upon serum stimulation in a Rho- and PDCD10-dependent manner (PubMed:27807006…	Cytoplasm
Q13895	BYST_HUMAN	reviewed	Bystin	BYSL	Homo sapiens (Human)	437	SUBCELLULAR LOCATION: Cytoplasm {ECO:0000269|PubMed:17381424}. Nucleus, nucleolus {ECO:0000269|PubMed:17381424}. Note=Associated with 40S ribosomal subunits.	Cytoplasm
Q14258	TRI25_HUMAN	reviewed	E3 ubiquitin/ISG15 ligase TRIM25 (EC 6.3.2.n3) (Estrogen-responsive finger protein) (RING finger protein 147) (RING-type E3 ubiquitin transferase) (EC 2.3.2.27) (RING-type E3 ubiquitin transferase TRIM25) (Tripartite motif-containing protein 25) (Ubiquitin/ISG15-conjugating enzyme TRIM25) (Zinc finger protein 147)	TRIM25 EFP RNF147 ZNF147	Homo sapiens (Human)	630	SUBCELLULAR LOCATION: Cytoplasm {ECO:0000269|PubMed:17392790}. Note=Colocalized with DDX58 at cytoplasmic perinuclear bodies.	Cytoplasm
Q8N6H7	ARFG2_HUMAN	reviewed	ADP-ribosylation factor GTPase-activating protein 2 (ARF GAP 2) (GTPase-activating protein ZNF289) (Zinc finger protein 289)	ARFGAP2 ZNF289 Nbla10535	Homo sapiens (Human)	521	SUBCELLULAR LOCATION: Cytoplasm {ECO:0000269|PubMed:17760859}. Golgi apparatus membrane {ECO:0000269|PubMed:17760859}; Peripheral membrane protein {ECO:0000269|PubMed:17760859}; Cytoplasmic side {ECO:0000269|PubMed:17760859}. Note=Also found on peripheral punctate structures likely to be endoplasmic reticulum-Golgi intermediate compartment.	Cytoplasm
Q99816	TS101_HUMAN	reviewed	Tumor susceptibility gene 101 protein (ESCRT-I complex subunit TSG101)	TSG101	Homo sapiens (Human)	390	SUBCELLULAR LOCATION: Cytoplasm {ECO:0000269|PubMed:17853893}. Early endosome membrane {ECO:0000269|PubMed:23166352}; Peripheral membrane protein {ECO:0000305|PubMed:23166352}; Cytoplasmic side {ECO:0000305|PubMed:23166352}. Late endosome membrane {ECO:0000269|PubMed:11916981, ECO:0000269|PubMed:17229889}; Peripheral membrane protein. Cytoplasm, cytoskeleton, microtubule organizing center, centro…	Cytoplasm
Q9UHD9	UBQL2_HUMAN	reviewed	Ubiquilin-2 (Chap1) (DSK2 homolog) (Protein linking IAP with cytoskeleton 2) (PLIC-2) (hPLIC-2) (Ubiquitin-like product Chap1/Dsk2)	UBQLN2 N4BP4 PLIC2 HRIHFB2157	Homo sapiens (Human)	624	SUBCELLULAR LOCATION: Cytoplasm {ECO:0000269|PubMed:18199683}. Nucleus {ECO:0000269|PubMed:9853615}. Membrane {ECO:0000250|UniProtKB:Q9QZM0}. Cytoplasmic vesicle, autophagosome {ECO:0000269|PubMed:19148225}. Note=Colocalizes with a subset of proteasomes, namely those that are cytoskeleton associated or free in the cytosol. Associated with fibers in mitotic cells. {ECO:0000269|PubMed:10983987}.	Cytoplasm
Q16181	SEPT7_HUMAN	reviewed	Septin-7 (CDC10 protein homolog)	SEPT7 CDC10	Homo sapiens (Human)	437	SUBCELLULAR LOCATION: Cytoplasm {ECO:0000269|PubMed:18460473}. Chromosome, centromere, kinetochore {ECO:0000269|PubMed:18460473}. Cytoplasm, cytoskeleton, spindle {ECO:0000269|PubMed:18460473}. Cleavage furrow {ECO:0000269|PubMed:18460473}. Midbody {ECO:0000269|PubMed:18460473}. Cytoplasm, cytoskeleton, cilium axoneme {ECO:0000250}. Cell projection, cilium, flagellum {ECO:0000269|PubMed:25588830}…	Cytoplasm
O75828	CBR3_HUMAN	reviewed	Carbonyl reductase [NADPH] 3 (EC 1.1.1.184) (NADPH-dependent carbonyl reductase 3) (Short chain dehydrogenase/reductase family 21C member 2)	CBR3	Homo sapiens (Human)	277	SUBCELLULAR LOCATION: Cytoplasm {ECO:0000269|PubMed:18493841}.	Cytoplasm
Q14CX7	NAA25_HUMAN	reviewed	N-alpha-acetyltransferase 25, NatB auxiliary subunit (Mitochondrial distribution and morphology protein 20) (N-terminal acetyltransferase B complex subunit MDM20) (NatB complex subunit MDM20) (N-terminal acetyltransferase B complex subunit NAA25) (p120)	NAA25 C12orf30 MDM20 NAP1	Homo sapiens (Human)	972	SUBCELLULAR LOCATION: Cytoplasm {ECO:0000269|PubMed:18570629}.	Cytoplasm
Q9Y5K5	UCHL5_HUMAN	reviewed	Ubiquitin carboxyl-terminal hydrolase isozyme L5 (UCH-L5) (EC 3.4.19.12) (Ubiquitin C-terminal hydrolase UCH37) (Ubiquitin thioesterase L5)	UCHL5 UCH37 AD-019 CGI-70	Homo sapiens (Human)	329	SUBCELLULAR LOCATION: Cytoplasm {ECO:0000269|PubMed:18922472}. Nucleus {ECO:0000269|PubMed:18922472}. Note=Associates with the proteasome 19S subunit in the cytoplasm. Associates with the INO80 complex in the nucleus.	Cytoplasm
O95793	STAU1_HUMAN	reviewed	Double-stranded RNA-binding protein Staufen homolog 1	STAU1 STAU	Homo sapiens (Human)	577	SUBCELLULAR LOCATION: Cytoplasm {ECO:0000269|PubMed:19029303}. Rough endoplasmic reticulum {ECO:0000269|PubMed:19029303}. Note=Localizes exclusively with the rough reticulum endoplasmic (RER).	Cytoplasm
Q93008	USP9X_HUMAN	reviewed	Probable ubiquitin carboxyl-terminal hydrolase FAF-X (EC 3.4.19.12) (Deubiquitinating enzyme FAF-X) (Fat facets in mammals) (hFAM) (Fat facets protein-related, X-linked) (Ubiquitin thioesterase FAF-X) (Ubiquitin-specific protease 9, X chromosome) (Ubiquitin-specific-processing protease FAF-X)	USP9X DFFRX FAM USP9	Homo sapiens (Human)	2570	SUBCELLULAR LOCATION: Cytoplasm {ECO:0000269|PubMed:19135894}. Cell projection, growth cone {ECO:0000269|PubMed:24607389}.	Cytoplasm
P29144	TPP2_HUMAN	reviewed	Tripeptidyl-peptidase 2 (TPP-2) (EC 3.4.14.10) (Tripeptidyl aminopeptidase) (Tripeptidyl-peptidase II) (TPP-II)	TPP2	Homo sapiens (Human)	1249	SUBCELLULAR LOCATION: Cytoplasm {ECO:0000269|PubMed:19747897}. Nucleus {ECO:0000269|PubMed:19747897}. Note=Translocates to the nucleus in responce to gamma-irradiation.	Cytoplasm
Q6PKG0	LARP1_HUMAN	reviewed	La-related protein 1 (La ribonucleoprotein domain family member 1)	LARP1 KIAA0731 LARP	Homo sapiens (Human)	1096	SUBCELLULAR LOCATION: Cytoplasm {ECO:0000269|PubMed:20430826, ECO:0000269|PubMed:24532714}. Cytoplasmic granule {ECO:0000269|PubMed:25940091}. Note=Colocalizes with RPTOR and PABPC1 in cytoplasmic granules that resemble stress granules. {ECO:0000269|PubMed:25940091}.	Cytoplasm
Q9Y2L1	RRP44_HUMAN	reviewed	Exosome complex exonuclease RRP44 (EC 3.1.13.-) (EC 3.1.26.-) (Protein DIS3 homolog) (Ribosomal RNA-processing protein 44)	DIS3 KIAA1008 RRP44	Homo sapiens (Human)	958	SUBCELLULAR LOCATION: Cytoplasm {ECO:0000269|PubMed:20531386}. Nucleus, nucleolus {ECO:0000269|PubMed:12429849}. Nucleus, nucleoplasm {ECO:0000269|PubMed:20531389}. Nucleus {ECO:0000269|PubMed:20531386}. Note=Predominantly located in the nucleus (PubMed:20531386). According to PubMed:12429849, found in the nucleolus (PubMed:12429849). According to PubMed:20531386, excluded from nucleolus supporti…	Cytoplasm
O14744	ANM5_HUMAN	reviewed	Protein arginine N-methyltransferase 5 (EC 2.1.1.320) (72 kDa ICln-binding protein) (Histone-arginine N-methyltransferase PRMT5) (Jak-binding protein 1) (Shk1 kinase-binding protein 1 homolog) (SKB1 homolog) (SKB1Hs) [Cleaved into: Protein arginine N-methyltransferase 5, N-terminally processed]	PRMT5 HRMT1L5 IBP72 JBP1 SKB1	Homo sapiens (Human)	637	SUBCELLULAR LOCATION: Cytoplasm {ECO:0000269|PubMed:21917714, ECO:0000269|PubMed:22269951}. Nucleus {ECO:0000269|PubMed:18404153, ECO:0000269|PubMed:21917714, ECO:0000269|PubMed:22269951}. Golgi apparatus {ECO:0000269|PubMed:20421892}.	Cytoplasm
Q9Y4E8	UBP15_HUMAN	reviewed	Ubiquitin carboxyl-terminal hydrolase 15 (EC 3.4.19.12) (Deubiquitinating enzyme 15) (Ubiquitin thioesterase 15) (Ubiquitin-specific-processing protease 15) (Unph-2) (Unph4)	USP15 KIAA0529	Homo sapiens (Human)	981	SUBCELLULAR LOCATION: Cytoplasm {ECO:0000269|PubMed:21947082, ECO:0000269|PubMed:24526689}. Nucleus {ECO:0000269|PubMed:21947082, ECO:0000269|PubMed:24526689}.	Cytoplasm
P11388	TOP2A_HUMAN	reviewed	DNA topoisomerase 2-alpha (EC 5.99.1.3) (DNA topoisomerase II, alpha isozyme)	TOP2A TOP2	Homo sapiens (Human)	1531	SUBCELLULAR LOCATION: Cytoplasm {ECO:0000269|PubMed:22013166}. Nucleus, nucleoplasm {ECO:0000269|PubMed:22013166}. Note=Generally located in the nucleoplasm.	Cytoplasm
Q86Y56	DAAF5_HUMAN	reviewed	Dynein assembly factor 5, axonemal (HEAT repeat-containing protein 2)	DNAAF5 HEATR2	Homo sapiens (Human)	855	SUBCELLULAR LOCATION: Cytoplasm {ECO:0000269|PubMed:23040496, ECO:0000269|PubMed:25232951}. Cytoplasmic granule {ECO:0000269|PubMed:23040496, ECO:0000269|PubMed:25232951}. Note=Observed only in the cytoplasm of ciliated cells and absent from cilia. {ECO:0000269|PubMed:23040496, ECO:0000269|PubMed:25232951}.	Cytoplasm
O43156	TTI1_HUMAN	reviewed	TELO2-interacting protein 1 homolog (Protein SMG10)	TTI1 KIAA0406 SMG10	Homo sapiens (Human)	1089	SUBCELLULAR LOCATION: Cytoplasm {ECO:0000269|PubMed:23263282}.	Cytoplasm
Q06124	PTN11_HUMAN	reviewed	Tyrosine-protein phosphatase non-receptor type 11 (EC 3.1.3.48) (Protein-tyrosine phosphatase 1D) (PTP-1D) (Protein-tyrosine phosphatase 2C) (PTP-2C) (SH-PTP2) (SHP-2) (Shp2) (SH-PTP3)	PTPN11 PTP2C SHPTP2	Homo sapiens (Human)	597	SUBCELLULAR LOCATION: Cytoplasm {ECO:0000269|PubMed:26742426}. Nucleus {ECO:0000269|PubMed:26742426}.	Cytoplasm
Q9Y263	PLAP_HUMAN	reviewed	Phospholipase A-2-activating protein (PLA2P) (PLAP)	PLAA PLAP	Homo sapiens (Human)	795	SUBCELLULAR LOCATION: Cytoplasm {ECO:0000269|PubMed:27753622}. Note=Recruited to damaged lysosomes decorated with K48-linked ubiquitin chains. {ECO:0000269|PubMed:27753622}.	Cytoplasm
P49591	SYSC_HUMAN	reviewed	Serine--tRNA ligase, cytoplasmic (EC 6.1.1.11) (Seryl-tRNA synthetase) (SerRS) (Seryl-tRNA(Ser/Sec) synthetase)	SARS SERS	Homo sapiens (Human)	514	SUBCELLULAR LOCATION: Cytoplasm {ECO:0000269|PubMed:28236339}.	Cytoplasm
Q16539	MK14_HUMAN	reviewed	Mitogen-activated protein kinase 14 (MAP kinase 14) (MAPK 14) (EC 2.7.11.24) (Cytokine suppressive anti-inflammatory drug-binding protein) (CSAID-binding protein) (CSBP) (MAP kinase MXI2) (MAX-interacting protein 2) (Mitogen-activated protein kinase p38 alpha) (MAP kinase p38 alpha) (Stress-activated protein kinase 2a) (SAPK2a)	MAPK14 CSBP CSBP1 CSBP2 CSPB1 MXI2 SAPK2A	Homo sapiens (Human)	360	SUBCELLULAR LOCATION: Cytoplasm {ECO:0000269|PubMed:7535770}. Nucleus {ECO:0000269|PubMed:7535770}.	Cytoplasm
Q16851	UGPA_HUMAN	reviewed	UTP--glucose-1-phosphate uridylyltransferase (EC 2.7.7.9) (UDP-glucose pyrophosphorylase) (UDPGP) (UGPase)	UGP2 UGP1	Homo sapiens (Human)	508	SUBCELLULAR LOCATION: Cytoplasm {ECO:0000269|PubMed:8354390}.	Cytoplasm
Q00341	VIGLN_HUMAN	reviewed	Vigilin (High density lipoprotein-binding protein) (HDL-binding protein)	HDLBP HBP VGL	Homo sapiens (Human)	1268	SUBCELLULAR LOCATION: Cytoplasm {ECO:0000269|PubMed:8605996}. Nucleus {ECO:0000269|PubMed:8605996}.	Cytoplasm
P78406	RAE1L_HUMAN	reviewed	mRNA export factor (Rae1 protein homolog) (mRNA-associated protein mrnp 41)	RAE1 MRNP41	Homo sapiens (Human)	368	SUBCELLULAR LOCATION: Cytoplasm {ECO:0000269|PubMed:9256445}. Nucleus {ECO:0000269|PubMed:9256445}. Cytoplasm, cytoskeleton, spindle pole {ECO:0000269|PubMed:17172455}. Note=Recruited from interphase nuclei to spindle MTs during mitosis. {ECO:0000269|PubMed:17172455}.	Cytoplasm
P61201	CSN2_HUMAN	reviewed	COP9 signalosome complex subunit 2 (SGN2) (Signalosome subunit 2) (Alien homolog) (JAB1-containing signalosome subunit 2) (Thyroid receptor-interacting protein 15) (TR-interacting protein 15) (TRIP-15)	COPS2 CSN2 TRIP15	Homo sapiens (Human)	443	SUBCELLULAR LOCATION: Cytoplasm {ECO:0000269|PubMed:9535219}. Nucleus {ECO:0000269|PubMed:10207062}.	Cytoplasm
Q9BYJ9	YTHD1_HUMAN	reviewed	YTH domain-containing family protein 1 (Dermatomyositis associated with cancer putative autoantigen 1) (DACA-1)	YTHDF1 C20orf21	Homo sapiens (Human)	559	SUBCELLULAR LOCATION: Cytoplasm {ECO:0000303|PubMed:26046440}.	Cytoplasm
Q14671	PUM1_HUMAN	reviewed	Pumilio homolog 1 (HsPUM) (Pumilio-1)	PUM1 KIAA0099 PUMH1	Homo sapiens (Human)	1186	SUBCELLULAR LOCATION: Cytoplasm {ECO:0000305|PubMed:26724866}. Cytoplasm, P-body {ECO:0000305|PubMed:20818387}. Cytoplasmic granule {ECO:0000269|PubMed:25340845}. Note=Recruited to cytoplasmic stress granules upon viral infection. {ECO:0000269|PubMed:25340845}.	Cytoplasm
Q8IYD1	ERF3B_HUMAN	reviewed	Eukaryotic peptide chain release factor GTP-binding subunit ERF3B (Eukaryotic peptide chain release factor subunit 3b) (eRF3b) (G1 to S phase transition protein 2 homolog)	GSPT2 ERF3B	Homo sapiens (Human)	628	SUBCELLULAR LOCATION: Cytoplasm {ECO:0000305}.	Cytoplasm
Q8NFI4	F10A5_HUMAN	reviewed	Putative protein FAM10A5 (Suppression of tumorigenicity 13 pseudogene 5)	ST13P5 FAM10A5	Homo sapiens (Human)	369	SUBCELLULAR LOCATION: Cytoplasm {ECO:0000305}.	Cytoplasm
Q9H074	PAIP1_HUMAN	reviewed	Polyadenylate-binding protein-interacting protein 1 (PABP-interacting protein 1) (PAIP-1) (Poly(A)-binding protein-interacting protein 1)	PAIP1	Homo sapiens (Human)	479	SUBCELLULAR LOCATION: Cytoplasm {ECO:0000305}.	Cytoplasm
Q9Y376	CAB39_HUMAN	reviewed	Calcium-binding protein 39 (MO25alpha) (Protein Mo25)	CAB39 MO25 CGI-66	Homo sapiens (Human)	341	SUBCELLULAR LOCATION: Cytoplasm {ECO:0000305}.	Cytoplasm
O60784	TOM1_HUMAN	reviewed	Target of Myb protein 1	TOM1	Homo sapiens (Human)	492	SUBCELLULAR LOCATION: Cytoplasm {ECO:0000305}. Membrane {ECO:0000305}; Peripheral membrane protein {ECO:0000305}.	Cytoplasm
P62195	PRS8_HUMAN	reviewed	26S proteasome regulatory subunit 8 (26S proteasome AAA-ATPase subunit RPT6) (Proteasome 26S subunit ATPase 5) (Proteasome subunit p45) (Thyroid hormone receptor-interacting protein 1) (TRIP1) (p45/SUG)	PSMC5 SUG1	Homo sapiens (Human)	406	SUBCELLULAR LOCATION: Cytoplasm {ECO:0000305}. Nucleus {ECO:0000305}.	Cytoplasm
P17980	PRS6A_HUMAN	reviewed	26S proteasome regulatory subunit 6A (26S proteasome AAA-ATPase subunit RPT5) (Proteasome 26S subunit ATPase 3) (Proteasome subunit P50) (Tat-binding protein 1) (TBP-1)	PSMC3 TBP1	Homo sapiens (Human)	439	SUBCELLULAR LOCATION: Cytoplasm {ECO:0000305}. Nucleus {ECO:0000305}. Cytoplasm, P-body {ECO:0000250}. Note=Colocalizes with TRIM5 in the cytoplasmic bodies. {ECO:0000250}.	Cytoplasm
Q9UJU6	DBNL_HUMAN	reviewed	Drebrin-like protein (Cervical SH3P7) (Cervical mucin-associated protein) (Drebrin-F) (HPK1-interacting protein of 55 kDa) (HIP-55) (SH3 domain-containing protein 7)	DBNL CMAP SH3P7 PP5423	Homo sapiens (Human)	430	SUBCELLULAR LOCATION: Cytoplasm, cytoskeleton {ECO:0000250|UniProtKB:Q62418}. Cell projection, lamellipodium {ECO:0000250|UniProtKB:Q62418}. Cell projection, ruffle {ECO:0000250|UniProtKB:Q62418}. Cytoplasm, cell cortex {ECO:0000250|UniProtKB:Q62418}. Cytoplasm, cytosol {ECO:0000250|UniProtKB:Q62418}. Cell junction, synapse {ECO:0000250|UniProtKB:Q62418}. Cell projection {ECO:0000250|UniProtKB:Q6…	Cytoplasm
P52907	CAZA1_HUMAN	reviewed	F-actin-capping protein subunit alpha-1 (CapZ alpha-1)	CAPZA1	Homo sapiens (Human)	286	SUBCELLULAR LOCATION: Cytoplasm, cytoskeleton {ECO:0000250}.	Cytoplasm
Q9Y5K6	CD2AP_HUMAN	reviewed	CD2-associated protein (Adapter protein CMS) (Cas ligand with multiple SH3 domains)	CD2AP	Homo sapiens (Human)	639	SUBCELLULAR LOCATION: Cytoplasm, cytoskeleton {ECO:0000250}. Cell projection, ruffle {ECO:0000250}. Note=Colocalizes with F-actin and BCAR1/p130Cas in membrane ruffles. Located at podocyte slit diaphragm between podocyte foot processes (By similarity). During late anaphase and telophase, concentrates in the vicinity of the midzone microtubules and in the midbody in late telophase. {ECO:0000250, E…	Cytoplasm
P47756	CAPZB_HUMAN	reviewed	F-actin-capping protein subunit beta (CapZ beta)	CAPZB	Homo sapiens (Human)	277	SUBCELLULAR LOCATION: Cytoplasm, cytoskeleton {ECO:0000250}. Cytoplasm, myofibril, sarcomere {ECO:0000250}.	Cytoplasm
A0A024R0V4	A0A024R0V4_HUMAN	unreviewed	Vasodilator-stimulated phosphoprotein isoform 1 (Vasodilator-stimulated phosphoprotein, isoform CRA_a)	VASP hCG_20727	Homo sapiens (Human)	380	SUBCELLULAR LOCATION: Cytoplasm, cytoskeleton {ECO:0000256|PIRNR:PIRNR038010}.	Cytoplasm
Q86VS8	HOOK3_HUMAN	reviewed	Protein Hook homolog 3 (h-hook3) (hHK3)	HOOK3	Homo sapiens (Human)	718	SUBCELLULAR LOCATION: Cytoplasm, cytoskeleton {ECO:0000269|PubMed:11238449}. Golgi apparatus {ECO:0000269|PubMed:11238449}. Note=Enriched at the cis-face of the Golgi complex. Localizes to microtubule asters in prophase. {ECO:0000269|PubMed:11238449}.	Cytoplasm
Q92974	ARHG2_HUMAN	reviewed	Rho guanine nucleotide exchange factor 2 (Guanine nucleotide exchange factor H1) (GEF-H1) (Microtubule-regulated Rho-GEF) (Proliferating cell nucleolar antigen p40)	ARHGEF2 KIAA0651 LFP40	Homo sapiens (Human)	986	SUBCELLULAR LOCATION: Cytoplasm, cytoskeleton {ECO:0000269|PubMed:11912491, ECO:0000269|PubMed:21887730, ECO:0000269|PubMed:9857026}. Cytoplasm {ECO:0000269|PubMed:15827085, ECO:0000269|PubMed:21887730}. Cell junction, tight junction {ECO:0000269|PubMed:19043560}. Golgi apparatus {ECO:0000269|PubMed:15827085}. Cytoplasm, cytoskeleton, spindle {ECO:0000269|PubMed:17488622}. Cell projection, ruffle…	Cytoplasm
Q15654	TRIP6_HUMAN	reviewed	Thyroid receptor-interacting protein 6 (TR-interacting protein 6) (TRIP-6) (Opa-interacting protein 1) (OIP-1) (Zyxin-related protein 1) (ZRP-1)	TRIP6 OIP1	Homo sapiens (Human)	476	SUBCELLULAR LOCATION: Cytoplasm, cytoskeleton {ECO:0000269|PubMed:16624523}. Cell junction, focal adhesion {ECO:0000269|PubMed:16624523}. Nucleus {ECO:0000269|PubMed:16624523}. Cytoplasm {ECO:0000269|PubMed:16624523}. Note=Shuttles between nucleus and cytoplasm.	Cytoplasm
Q9UHD8	SEPT9_HUMAN	reviewed	Septin-9 (MLL septin-like fusion protein MSF-A) (MLL septin-like fusion protein) (Ovarian/Breast septin) (Ov/Br septin) (Septin D1)	SEPT9 KIAA0991 MSF	Homo sapiens (Human)	586	SUBCELLULAR LOCATION: Cytoplasm, cytoskeleton {ECO:0000269|PubMed:17546647, ECO:0000269|PubMed:17922164}. Note=In an epithelial cell line, concentrates at cell-cell contact areas. After TGF-beta1 treatment and induction of epithelial to mesenchymal transition, colocalizes partly with actin stress fibers. During bacterial infection, displays a collar shape structure next to actin at the pole of in…	Cytoplasm
P61160	ARP2_HUMAN	reviewed	Actin-related protein 2 (Actin-like protein 2)	ACTR2 ARP2	Homo sapiens (Human)	394	SUBCELLULAR LOCATION: Cytoplasm, cytoskeleton {ECO:0000269|PubMed:9000076}. Cell projection {ECO:0000269|PubMed:9000076}.	Cytoplasm
Q9H0B6	KLC2_HUMAN	reviewed	Kinesin light chain 2 (KLC 2)	KLC2	Homo sapiens (Human)	622	SUBCELLULAR LOCATION: Cytoplasm, cytoskeleton {ECO:0000305}.	Cytoplasm
O14965	AURKA_HUMAN	reviewed	Aurora kinase A (EC 2.7.11.1) (Aurora 2) (Aurora/IPL1-related kinase 1) (ARK-1) (Aurora-related kinase 1) (hARK1) (Breast tumor-amplified kinase) (Serine/threonine-protein kinase 15) (Serine/threonine-protein kinase 6) (Serine/threonine-protein kinase aurora-A)	AURKA AIK AIRK1 ARK1 AURA AYK1 BTAK IAK1 STK15 STK6	Homo sapiens (Human)	403	SUBCELLULAR LOCATION: Cytoplasm, cytoskeleton, microtubule organizing center, centrosome {ECO:0000269|PubMed:12576638, ECO:0000269|PubMed:13678582, ECO:0000269|PubMed:17229885, ECO:0000269|PubMed:17726514, ECO:0000269|PubMed:19357306, ECO:0000269|PubMed:21225229, ECO:0000269|PubMed:22014574, ECO:0000269|PubMed:25657325, ECO:0000269|PubMed:9153231}. Cytoplasm, cytoskeleton, spindle pole {ECO:00002…	Cytoplasm
Q02750	MP2K1_HUMAN	reviewed	Dual specificity mitogen-activated protein kinase kinase 1 (MAP kinase kinase 1) (MAPKK 1) (MKK1) (EC 2.7.12.2) (ERK activator kinase 1) (MAPK/ERK kinase 1) (MEK 1)	MAP2K1 MEK1 PRKMK1	Homo sapiens (Human)	393	SUBCELLULAR LOCATION: Cytoplasm, cytoskeleton, microtubule organizing center, centrosome {ECO:0000269|PubMed:14737111}. Cytoplasm, cytoskeleton, microtubule organizing center, spindle pole body {ECO:0000269|PubMed:14737111}. Cytoplasm {ECO:0000269|PubMed:10409742, ECO:0000269|PubMed:17101779}. Nucleus {ECO:0000269|PubMed:17101779}. Membrane {ECO:0000269|PubMed:10409742}; Peripheral membrane prote…	Cytoplasm
Q13561	DCTN2_HUMAN	reviewed	Dynactin subunit 2 (50 kDa dynein-associated polypeptide) (Dynactin complex 50 kDa subunit) (DCTN-50) (p50 dynamitin)	DCTN2 DCTN50	Homo sapiens (Human)	401	SUBCELLULAR LOCATION: Cytoplasm, cytoskeleton, microtubule organizing center, centrosome {ECO:0000269|PubMed:8647893}. Membrane {ECO:0000269|PubMed:8647893}; Peripheral membrane protein {ECO:0000269|PubMed:8647893}.	Cytoplasm
Q9UPV0	CE164_HUMAN	reviewed	Centrosomal protein of 164 kDa (Cep164)	CEP164 KIAA1052 NPHP15	Homo sapiens (Human)	1460	SUBCELLULAR LOCATION: Cytoplasm, cytoskeleton, microtubule organizing center, centrosome, centriole {ECO:0000269|PubMed:26337392}. Nucleus. Note=Localizes specifically to very distally located appendage structures on the mature centriole from which initiate PC formation (PubMed:26337392). Persisted at centrioles throughout mitosis. Expressed in chromatin-enriched nuclear fraction of HeLa cells. I…	Cytoplasm
P24941	CDK2_HUMAN	reviewed	Cyclin-dependent kinase 2 (EC 2.7.11.22) (Cell division protein kinase 2) (p33 protein kinase)	CDK2 CDKN2	Homo sapiens (Human)	298	SUBCELLULAR LOCATION: Cytoplasm, cytoskeleton, microtubule organizing center, centrosome. Nucleus, Cajal body. Cytoplasm. Endosome. Note=Localized at the centrosomes in late G2 phase after separation of the centrosomes but before the start of prophase. Nuclear-cytoplasmic trafficking is mediated during the inhibition by 1,25-(OH)(2)D(3).	Cytoplasm
Q96GX5	GWL_HUMAN	reviewed	Serine/threonine-protein kinase greatwall (GW) (GWL) (hGWL) (EC 2.7.11.1) (Microtubule-associated serine/threonine-protein kinase-like) (MAST-L)	MASTL GW GWL THC2	Homo sapiens (Human)	879	SUBCELLULAR LOCATION: Cytoplasm, cytoskeleton, microtubule organizing center, centrosome. Nucleus. Cleavage furrow. Note=During interphase is mainly nuclear, upon nuclear envelope breakdown localizes at the cytoplasm and during mitosis at the centrosomes. Upon mitotic exit moves to the cleavage furrow.	Cytoplasm
Q3KQU3	MA7D1_HUMAN	reviewed	MAP7 domain-containing protein 1 (Arginine/proline-rich coiled-coil domain-containing protein 1) (Proline/arginine-rich coiled-coil domain-containing protein 1)	MAP7D1 KIAA1187 PARCC1 RPRC1 PP2464	Homo sapiens (Human)	841	SUBCELLULAR LOCATION: Cytoplasm, cytoskeleton, spindle {ECO:0000269|PubMed:15561729}.	Cytoplasm
Q92797	SYMPK_HUMAN	reviewed	Symplekin	SYMPK SPK	Homo sapiens (Human)	1274	SUBCELLULAR LOCATION: Cytoplasm, cytoskeleton. Cell junction, tight junction. Cell membrane; Peripheral membrane protein; Cytoplasmic side. Cell junction. Nucleus, nucleoplasm. Note=Cytoplasmic face of adhesion plaques (major) and nucleoplasm (minor) (in cells with TJ). Nucleoplasm (in cells without TJ). Nuclear bodies of heat-stressed cells. Colocalizes with HSF1 in nuclear stress bodies upon he…	Cytoplasm
Q13813	SPTN1_HUMAN	reviewed	Spectrin alpha chain, non-erythrocytic 1 (Alpha-II spectrin) (Fodrin alpha chain) (Spectrin, non-erythroid alpha subunit)	SPTAN1 NEAS SPTA2	Homo sapiens (Human)	2472	SUBCELLULAR LOCATION: Cytoplasm, cytoskeleton. Cytoplasm, cell cortex. Note=Expressed along the cell membrane in podocytes and presumptive tubule cells during glomerulogenesis and is expressed along lateral cell margins in tubule cells. {ECO:0000250}.	Cytoplasm
Q15691	MARE1_HUMAN	reviewed	Microtubule-associated protein RP/EB family member 1 (APC-binding protein EB1) (End-binding protein 1) (EB1)	MAPRE1	Homo sapiens (Human)	268	SUBCELLULAR LOCATION: Cytoplasm, cytoskeleton. Cytoplasm, cytoskeleton, microtubule organizing center, centrosome. Note=Associated with the microtubule network at the growing distal tip of microtubules. Also enriched at the centrosome.	Cytoplasm
Q9Y266	NUDC_HUMAN	reviewed	Nuclear migration protein nudC (Nuclear distribution protein C homolog)	NUDC	Homo sapiens (Human)	331	SUBCELLULAR LOCATION: Cytoplasm, cytoskeleton. Nucleus. Note=In a filamentous pattern adjacent to the nucleus of migrating cerebellar granule cells. Colocalizes with tubulin and dynein and with the microtubule organizing center. Distributed throughout the cytoplasm of non-migrating cells. A small proportion is nuclear, in a punctate pattern.	Cytoplasm
Q9NTX5	ECHD1_HUMAN	reviewed	Ethylmalonyl-CoA decarboxylase (EC 4.1.1.94) (Enoyl-CoA hydratase domain-containing protein 1) (Methylmalonyl-CoA decarboxylase) (MMCD) (EC 4.1.1.41)	ECHDC1	Homo sapiens (Human)	307	SUBCELLULAR LOCATION: Cytoplasm, cytosol {ECO:0000250}.	Cytoplasm
Q9UBF2	COPG2_HUMAN	reviewed	Coatomer subunit gamma-2 (Gamma-2-coat protein) (Gamma-2-COP)	COPG2	Homo sapiens (Human)	871	SUBCELLULAR LOCATION: Cytoplasm, cytosol {ECO:0000250}. Golgi apparatus membrane {ECO:0000250}; Peripheral membrane protein {ECO:0000250}; Cytoplasmic side {ECO:0000250}. Cytoplasmic vesicle, COPI-coated vesicle membrane {ECO:0000250}; Peripheral membrane protein {ECO:0000250}; Cytoplasmic side {ECO:0000250}. Note=The coatomer is cytoplasmic or polymerized on the cytoplasmic side of the Golgi, as…	Cytoplasm
O43524	FOXO3_HUMAN	reviewed	Forkhead box protein O3 (AF6q21 protein) (Forkhead in rhabdomyosarcoma-like 1)	FOXO3 FKHRL1 FOXO3A	Homo sapiens (Human)	673	SUBCELLULAR LOCATION: Cytoplasm, cytosol {ECO:0000269|PubMed:10102273, ECO:0000269|PubMed:15084260, ECO:0000269|PubMed:16751106, ECO:0000269|PubMed:17711846, ECO:0000269|PubMed:21329882, ECO:0000269|PubMed:22313691, ECO:0000269|PubMed:22761832}. Nucleus {ECO:0000269|PubMed:10102273, ECO:0000269|PubMed:15084260, ECO:0000269|PubMed:16751106, ECO:0000269|PubMed:17711846, ECO:0000269|PubMed:21329882,…	Cytoplasm
P55786	PSA_HUMAN	reviewed	Puromycin-sensitive aminopeptidase (PSA) (EC 3.4.11.14) (Cytosol alanyl aminopeptidase) (AAP-S)	NPEPPS PSA	Homo sapiens (Human)	919	SUBCELLULAR LOCATION: Cytoplasm, cytosol {ECO:0000269|PubMed:10978616}. Nucleus {ECO:0000305}.	Cytoplasm
Q0VDF9	HSP7E_HUMAN	reviewed	Heat shock 70 kDa protein 14 (HSP70-like protein 1) (Heat shock protein HSP60)	HSPA14 HSP60 HSP70L1	Homo sapiens (Human)	509	SUBCELLULAR LOCATION: Cytoplasm, cytosol {ECO:0000269|PubMed:16002468}.	Cytoplasm
P46379	BAG6_HUMAN	reviewed	Large proline-rich protein BAG6 (BAG family molecular chaperone regulator 6) (BCL2-associated athanogene 6) (BAG-6) (HLA-B-associated transcript 3) (Protein G3) (Protein Scythe)	BAG6 BAT3 G3	Homo sapiens (Human)	1132	SUBCELLULAR LOCATION: Cytoplasm, cytosol {ECO:0000269|PubMed:17403783, ECO:0000269|PubMed:20676083, ECO:0000269|PubMed:21636303}. Nucleus {ECO:0000269|PubMed:14960581, ECO:0000269|PubMed:17403783, ECO:0000269|PubMed:21636303}. Secreted, exosome {ECO:0000269|PubMed:18055229, ECO:0000269|PubMed:18852879}. Note=Normally localized in cytosol and nucleus, it can also be released extracellularly, in ex…	Cytoplasm
Q9NSV4	DIAP3_HUMAN	reviewed	Protein diaphanous homolog 3 (Diaphanous-related formin-3) (DRF3) (MDia2)	DIAPH3 DIAP3	Homo sapiens (Human)	1193	SUBCELLULAR LOCATION: Cytoplasm, cytosol {ECO:0000269|PubMed:18755006, ECO:0000269|PubMed:19457867}. Note=During mitosis, co-localizes with the actin-rich cleavage furrow and with the microtubule-rich central spindle during cytokinesis.	Cytoplasm
P14678	RSMB_HUMAN	reviewed	Small nuclear ribonucleoprotein-associated proteins B and B' (snRNP-B) (Sm protein B/B') (Sm-B/B') (SmB/B')	SNRPB COD SNRPB1	Homo sapiens (Human)	240	SUBCELLULAR LOCATION: Cytoplasm, cytosol {ECO:0000269|PubMed:18984161}. Nucleus {ECO:0000269|PubMed:18984161}. Note=SMN-mediated assembly into core snRNPs occurs in the cytosol before SMN-mediated transport to the nucleus to be included in spliceosomes.	Cytoplasm
Q92615	LAR4B_HUMAN	reviewed	La-related protein 4B (La ribonucleoprotein domain family member 4B) (La ribonucleoprotein domain family member 5) (La-related protein 5)	LARP4B KIAA0217 LARP5	Homo sapiens (Human)	738	SUBCELLULAR LOCATION: Cytoplasm, cytosol {ECO:0000269|PubMed:20573744}. Note=Localized in cytoplasmic mRNP granules containing untranslated mRNAs in response to arsenite treatment. {ECO:0000269|PubMed:20573744}.	Cytoplasm
Q7L5D6	GET4_HUMAN	reviewed	Golgi to ER traffic protein 4 homolog (Conserved edge-expressed protein) (Transmembrane domain recognition complex 35 kDa subunit) (TRC35)	GET4 C7orf20 CEE TRC35 CGI-20	Homo sapiens (Human)	327	SUBCELLULAR LOCATION: Cytoplasm, cytosol {ECO:0000269|PubMed:20676083, ECO:0000269|PubMed:21636303}.	Cytoplasm
Q16555	DPYL2_HUMAN	reviewed	Dihydropyrimidinase-related protein 2 (DRP-2) (Collapsin response mediator protein 2) (CRMP-2) (N2A3) (Unc-33-like phosphoprotein 2) (ULIP-2)	DPYSL2 CRMP2 ULIP2	Homo sapiens (Human)	572	SUBCELLULAR LOCATION: Cytoplasm, cytosol {ECO:0000269|PubMed:20801876}. Cytoplasm, cytoskeleton {ECO:0000269|PubMed:20801876}. Membrane {ECO:0000269|PubMed:20801876}. Note=Tightly but non-covalently associated with membranes.	Cytoplasm
Q12768	WASC5_HUMAN	reviewed	WASH complex subunit 5 (Strumpellin) (WASH complex subunit strumpellin)	WASHC5 KIAA0196	Homo sapiens (Human)	1159	SUBCELLULAR LOCATION: Cytoplasm, cytosol {ECO:0000269|PubMed:20833645}. Endoplasmic reticulum {ECO:0000269|PubMed:20833645}. Early endosome {ECO:0000269|PubMed:23085491, ECO:0000269|PubMed:23676666}. Note=Colocalizes with SYP/synaptophysin in the external molecular layer of the dentate gyrus and in motoneurons of the ventral horn of spinal cord. {ECO:0000269|PubMed:20833645}.	Cytoplasm
P61764	STXB1_HUMAN	reviewed	Syntaxin-binding protein 1 (MUNC18-1) (N-Sec1) (Protein unc-18 homolog 1) (Unc18-1) (Protein unc-18 homolog A) (Unc-18A) (p67)	STXBP1 UNC18A	Homo sapiens (Human)	594	SUBCELLULAR LOCATION: Cytoplasm, cytosol {ECO:0000269|PubMed:20887364}. Membrane; Peripheral membrane protein.	Cytoplasm
Q9Y5A9	YTHD2_HUMAN	reviewed	YTH domain-containing family protein 2 (CLL-associated antigen KW-14) (High-glucose-regulated protein 8) (Renal carcinoma antigen NY-REN-2)	YTHDF2 HGRG8	Homo sapiens (Human)	579	SUBCELLULAR LOCATION: Cytoplasm, cytosol {ECO:0000269|PubMed:26458103}. Nucleus {ECO:0000269|PubMed:26458103}. Cytoplasm, P-body {ECO:0000269|PubMed:24284625}. Note=Localizes to the cytosol and relocates to the nucleus following heat shock stress (PubMed:26458103). {ECO:0000269|PubMed:26458103}.	Cytoplasm
Q7Z739	YTHD3_HUMAN	reviewed	YTH domain-containing family protein 3	YTHDF3	Homo sapiens (Human)	585	SUBCELLULAR LOCATION: Cytoplasm, cytosol {ECO:0000305|PubMed:28106072}.	Cytoplasm
Q9UBB6	NCDN_HUMAN	reviewed	Neurochondrin	NCDN KIAA0607	Homo sapiens (Human)	729	SUBCELLULAR LOCATION: Cytoplasm, cytosol. Cell projection, dendrite. Note=Localizes to somatic regions of neurons.	Cytoplasm
O00429	DNM1L_HUMAN	reviewed	Dynamin-1-like protein (EC 3.6.5.5) (Dnm1p/Vps1p-like protein) (DVLP) (Dynamin family member proline-rich carboxyl-terminal domain less) (Dymple) (Dynamin-like protein) (Dynamin-like protein 4) (Dynamin-like protein IV) (HdynIV) (Dynamin-related protein 1)	DNM1L DLP1 DRP1	Homo sapiens (Human)	736	SUBCELLULAR LOCATION: Cytoplasm, cytosol. Golgi apparatus. Endomembrane system; Peripheral membrane protein. Mitochondrion outer membrane {ECO:0000269|PubMed:26122121, ECO:0000269|PubMed:27145208}; Peripheral membrane protein. Peroxisome. Membrane, clathrin-coated pit {ECO:0000250}. Cytoplasmic vesicle, secretory vesicle, synaptic vesicle membrane {ECO:0000250}. Note=Mainly cytosolic. Translocate…	Cytoplasm
P26196	DDX6_HUMAN	reviewed	Probable ATP-dependent RNA helicase DDX6 (EC 3.6.4.13) (ATP-dependent RNA helicase p54) (DEAD box protein 6) (Oncogene RCK)	DDX6 HLR2 RCK	Homo sapiens (Human)	483	SUBCELLULAR LOCATION: Cytoplasm, P-body {ECO:0000269|PubMed:16364915, ECO:0000269|PubMed:16699599, ECO:0000269|PubMed:20616046, ECO:0000269|PubMed:22915799, ECO:0000269|PubMed:26184334}. Cytoplasm {ECO:0000269|PubMed:26184334}. Nucleus {ECO:0000269|PubMed:26184334}. Note=Upon cellular stress, relocalizes to stress granules (PubMed:26184334). {ECO:0000269|PubMed:26184334}.	Cytoplasm
Q6P2E9	EDC4_HUMAN	reviewed	Enhancer of mRNA-decapping protein 4 (Autoantigen Ge-1) (Autoantigen RCD-8) (Human enhancer of decapping large subunit) (Hedls)	EDC4 HEDLS	Homo sapiens (Human)	1401	SUBCELLULAR LOCATION: Cytoplasm, P-body {ECO:0000269|PubMed:16364915, ECO:0000269|PubMed:9067524}. Nucleus {ECO:0000269|PubMed:7520377}.	Cytoplasm
A5YKK6	CNOT1_HUMAN	reviewed	CCR4-NOT transcription complex subunit 1 (CCR4-associated factor 1) (Negative regulator of transcription subunit 1 homolog) (NOT1H) (hNOT1)	CNOT1 CDC39 KIAA1007 NOT1 AD-005	Homo sapiens (Human)	2376	SUBCELLULAR LOCATION: Cytoplasm, P-body {ECO:0000269|PubMed:21976065}. Nucleus {ECO:0000305|PubMed:21976065}. Note=NANOS2 promotes its localization to P-body. {ECO:0000250}.	Cytoplasm
Q15056	IF4H_HUMAN	reviewed	Eukaryotic translation initiation factor 4H (eIF-4H) (Williams-Beuren syndrome chromosomal region 1 protein)	EIF4H KIAA0038 WBSCR1 WSCR1	Homo sapiens (Human)	248	SUBCELLULAR LOCATION: Cytoplasm, perinuclear region {ECO:0000250}.	Cytoplasm
O14976	GAK_HUMAN	reviewed	Cyclin-G-associated kinase (EC 2.7.11.1)	GAK	Homo sapiens (Human)	1311	SUBCELLULAR LOCATION: Cytoplasm, perinuclear region {ECO:0000269|PubMed:10625686}. Golgi apparatus, trans-Golgi network {ECO:0000269|PubMed:10625686}. Cell junction, focal adhesion {ECO:0000305|PubMed:10625686}. Note=Localizes to the perinuclear area and to the trans-Golgi network. Also seen on the plasma membrane, probably at focal adhesions.	Cytoplasm
Q9UDY8	MALT1_HUMAN	reviewed	Mucosa-associated lymphoid tissue lymphoma translocation protein 1 (EC 3.4.22.-) (MALT lymphoma-associated translocation) (Paracaspase)	MALT1 MLT	Homo sapiens (Human)	824	SUBCELLULAR LOCATION: Cytoplasm, perinuclear region {ECO:0000269|PubMed:16123224}. Nucleus {ECO:0000269|PubMed:16123224}. Note=Shuttles between the nucleus and cytoplasm. Found in perinuclear structures together with BCL10.	Cytoplasm
Q9UBB4	ATX10_HUMAN	reviewed	Ataxin-10 (Brain protein E46 homolog) (Spinocerebellar ataxia type 10 protein)	ATXN10 SCA10	Homo sapiens (Human)	475	SUBCELLULAR LOCATION: Cytoplasm, perinuclear region {ECO:0000269|PubMed:16498633}.	Cytoplasm
Q27J81	INF2_HUMAN	reviewed	Inverted formin-2 (HBEBP2-binding protein C)	INF2 C14orf151 C14orf173	Homo sapiens (Human)	1249	SUBCELLULAR LOCATION: Cytoplasm, perinuclear region {ECO:0000269|PubMed:20023659}.	Cytoplasm
Q6P3W7	SCYL2_HUMAN	reviewed	SCY1-like protein 2 (Coated vesicle-associated kinase of 104 kDa)	SCYL2 CVAK104 KIAA1360	Homo sapiens (Human)	929	SUBCELLULAR LOCATION: Cytoplasm, perinuclear region. Cytoplasmic vesicle, clathrin-coated vesicle. Golgi apparatus, trans-Golgi network membrane. Endosome membrane. Note=According to PubMed:15809293, plasma membrane-associated in clathrin-coated vesicles. According to PubMed:16914521, colocalizes to the trans-Golgi network (TGN) and to endosomal membranes with clathrin, transferrin and plasma mem…	Cytoplasm
O00170	AIP_HUMAN	reviewed	AH receptor-interacting protein (AIP) (Aryl-hydrocarbon receptor-interacting protein) (HBV X-associated protein 2) (XAP-2) (Immunophilin homolog ARA9)	AIP XAP2	Homo sapiens (Human)	330	SUBCELLULAR LOCATION: Cytoplasm.	Cytoplasm
O00764	PDXK_HUMAN	reviewed	Pyridoxal kinase (EC 2.7.1.35) (Pyridoxine kinase)	PDXK C21orf124 C21orf97 PKH PNK PRED79	Homo sapiens (Human)	312	SUBCELLULAR LOCATION: Cytoplasm.	Cytoplasm
O95429	BAG4_HUMAN	reviewed	BAG family molecular chaperone regulator 4 (BAG-4) (Bcl-2-associated athanogene 4) (Silencer of death domains)	BAG4 SODD	Homo sapiens (Human)	457	SUBCELLULAR LOCATION: Cytoplasm.	Cytoplasm
P14324	FPPS_HUMAN	reviewed	Farnesyl pyrophosphate synthase (FPP synthase) (FPS) (EC 2.5.1.10) ((2E,6E)-farnesyl diphosphate synthase) (Dimethylallyltranstransferase) (EC 2.5.1.1) (Farnesyl diphosphate synthase) (Geranyltranstransferase)	FDPS FPS KIAA1293	Homo sapiens (Human)	419	SUBCELLULAR LOCATION: Cytoplasm.	Cytoplasm
P15121	ALDR_HUMAN	reviewed	Aldose reductase (AR) (EC 1.1.1.21) (Aldehyde reductase) (Aldo-keto reductase family 1 member B1)	AKR1B1 ALDR1	Homo sapiens (Human)	316	SUBCELLULAR LOCATION: Cytoplasm.	Cytoplasm
P15559	NQO1_HUMAN	reviewed	NAD(P)H dehydrogenase [quinone] 1 (EC 1.6.5.2) (Azoreductase) (DT-diaphorase) (DTD) (Menadione reductase) (NAD(P)H:quinone oxidoreductase 1) (Phylloquinone reductase) (Quinone reductase 1) (QR1)	NQO1 DIA4 NMOR1	Homo sapiens (Human)	274	SUBCELLULAR LOCATION: Cytoplasm.	Cytoplasm
P16152	CBR1_HUMAN	reviewed	Carbonyl reductase [NADPH] 1 (EC 1.1.1.184) (15-hydroxyprostaglandin dehydrogenase [NADP(+)]) (EC 1.1.1.197) (NADPH-dependent carbonyl reductase 1) (Prostaglandin 9-ketoreductase) (Prostaglandin-E(2) 9-reductase) (EC 1.1.1.189) (Short chain dehydrogenase/reductase family 21C member 1)	CBR1 CBR CRN SDR21C1	Homo sapiens (Human)	277	SUBCELLULAR LOCATION: Cytoplasm.	Cytoplasm
P21266	GSTM3_HUMAN	reviewed	Glutathione S-transferase Mu 3 (EC 2.5.1.18) (GST class-mu 3) (GSTM3-3) (hGSTM3-3)	GSTM3 GST5	Homo sapiens (Human)	225	SUBCELLULAR LOCATION: Cytoplasm.	Cytoplasm
P21399	ACOC_HUMAN	reviewed	Cytoplasmic aconitate hydratase (Aconitase) (EC 4.2.1.3) (Citrate hydro-lyase) (Ferritin repressor protein) (Iron regulatory protein 1) (IRP1) (Iron-responsive element-binding protein 1) (IRE-BP 1)	ACO1 IREB1	Homo sapiens (Human)	889	SUBCELLULAR LOCATION: Cytoplasm.	Cytoplasm
P23381	SYWC_HUMAN	reviewed	Tryptophan--tRNA ligase, cytoplasmic (EC 6.1.1.2) (Interferon-induced protein 53) (IFP53) (Tryptophanyl-tRNA synthetase) (TrpRS) (hWRS) [Cleaved into: T1-TrpRS; T2-TrpRS]	WARS IFI53 WRS	Homo sapiens (Human)	471	SUBCELLULAR LOCATION: Cytoplasm.	Cytoplasm
P34896	GLYC_HUMAN	reviewed	Serine hydroxymethyltransferase, cytosolic (SHMT) (EC 2.1.2.1) (Glycine hydroxymethyltransferase) (Serine methylase)	SHMT1	Homo sapiens (Human)	483	SUBCELLULAR LOCATION: Cytoplasm.	Cytoplasm
P49589	SYCC_HUMAN	reviewed	Cysteine--tRNA ligase, cytoplasmic (EC 6.1.1.16) (Cysteinyl-tRNA synthetase) (CysRS)	CARS	Homo sapiens (Human)	748	SUBCELLULAR LOCATION: Cytoplasm.	Cytoplasm
P52888	THOP1_HUMAN	reviewed	Thimet oligopeptidase (EC 3.4.24.15) (Endopeptidase 24.15) (MP78)	THOP1	Homo sapiens (Human)	689	SUBCELLULAR LOCATION: Cytoplasm.	Cytoplasm
P55039	DRG2_HUMAN	reviewed	Developmentally-regulated GTP-binding protein 2 (DRG-2)	DRG2	Homo sapiens (Human)	364	SUBCELLULAR LOCATION: Cytoplasm.	Cytoplasm
Q01581	HMCS1_HUMAN	reviewed	Hydroxymethylglutaryl-CoA synthase, cytoplasmic (HMG-CoA synthase) (EC 2.3.3.10) (3-hydroxy-3-methylglutaryl coenzyme A synthase)	HMGCS1 HMGCS	Homo sapiens (Human)	520	SUBCELLULAR LOCATION: Cytoplasm.	Cytoplasm
Q14914	PTGR1_HUMAN	reviewed	Prostaglandin reductase 1 (PRG-1) (EC 1.3.1.-) (15-oxoprostaglandin 13-reductase) (EC 1.3.1.48) (NADP-dependent leukotriene B4 12-hydroxydehydrogenase) (EC 1.3.1.74)	PTGR1 LTB4DH	Homo sapiens (Human)	329	SUBCELLULAR LOCATION: Cytoplasm.	Cytoplasm
Q16537	2A5E_HUMAN	reviewed	Serine/threonine-protein phosphatase 2A 56 kDa regulatory subunit epsilon isoform (PP2A B subunit isoform B'-epsilon) (PP2A B subunit isoform B56-epsilon) (PP2A B subunit isoform PR61-epsilon) (PP2A B subunit isoform R5-epsilon)	PPP2R5E	Homo sapiens (Human)	467	SUBCELLULAR LOCATION: Cytoplasm.	Cytoplasm
Q9BWD1	THIC_HUMAN	reviewed	Acetyl-CoA acetyltransferase, cytosolic (EC 2.3.1.9) (Acetyl-CoA transferase-like protein) (Cytosolic acetoacetyl-CoA thiolase)	ACAT2 ACTL	Homo sapiens (Human)	397	SUBCELLULAR LOCATION: Cytoplasm.	Cytoplasm
Q12792	TWF1_HUMAN	reviewed	Twinfilin-1 (Protein A6) (Protein tyrosine kinase 9)	TWF1 PTK9	Homo sapiens (Human)	350	SUBCELLULAR LOCATION: Cytoplasm. Cytoplasm, cytoskeleton {ECO:0000250}. Note=Diffuse cytoplasmic localization with perinuclear and G-actin-rich cortical actin structures sublocalization. Also found at membrane ruffles and cell-cell contacts (By similarity). {ECO:0000250}.	Cytoplasm
P50570	DYN2_HUMAN	reviewed	Dynamin-2 (EC 3.6.5.5)	DNM2 DYN2	Homo sapiens (Human)	870	SUBCELLULAR LOCATION: Cytoplasm. Cytoplasm, cytoskeleton. Cell junction {ECO:0000250|UniProtKB:P39052}. Membrane, clathrin-coated pit {ECO:0000250|UniProtKB:P39052}. Cell junction, synapse, postsynaptic cell membrane, postsynaptic density. Cell junction, synapse. Midbody. Cell projection, phagocytic cup {ECO:0000250|UniProtKB:P39054}. Cytoplasmic vesicle, phagosome membrane {ECO:0000250|UniProtKB…	Cytoplasm
Q12965	MYO1E_HUMAN	reviewed	Unconventional myosin-Ie (Myosin-Ic) (Unconventional myosin 1E)	MYO1E MYO1C	Homo sapiens (Human)	1108	SUBCELLULAR LOCATION: Cytoplasm. Cytoplasm, cytoskeleton. Cytoplasmic vesicle. Cytoplasmic vesicle, clathrin-coated vesicle. Cell junction {ECO:0000250}. Note=Colocalizes with F-actin (By similarity). In cultured podocytes, it localizes close to and is associated with the cytoplasmic membrane, with enrichment at the lamellipodia tips. Colocalizes with cytoplasmic vesicles, including endocytic cla…	Cytoplasm
Q9Y2H1	ST38L_HUMAN	reviewed	Serine/threonine-protein kinase 38-like (EC 2.7.11.1) (NDR2 protein kinase) (Nuclear Dbf2-related kinase 2)	STK38L KIAA0965 NDR2	Homo sapiens (Human)	464	SUBCELLULAR LOCATION: Cytoplasm. Cytoplasm, cytoskeleton. Membrane. Note=Associated with the actin cytoskeleton. Co-localizes with STK24/MST3 in the membrane.	Cytoplasm
Q92900	RENT1_HUMAN	reviewed	Regulator of nonsense transcripts 1 (EC 3.6.4.-) (ATP-dependent helicase RENT1) (Nonsense mRNA reducing factor 1) (NORF1) (Up-frameshift suppressor 1 homolog) (hUpf1)	UPF1 KIAA0221 RENT1	Homo sapiens (Human)	1129	SUBCELLULAR LOCATION: Cytoplasm. Cytoplasm, P-body. Nucleus. Note=Hyperphosphorylated form is targeted to the P-body, while unphosphorylated protein is distributed throughout the cytoplasm.	Cytoplasm
Q14677	EPN4_HUMAN	reviewed	Clathrin interactor 1 (Clathrin-interacting protein localized in the trans-Golgi region) (Clint) (Enthoprotin) (Epsin-4) (Epsin-related protein) (EpsinR)	CLINT1 ENTH EPN4 EPNR KIAA0171	Homo sapiens (Human)	625	SUBCELLULAR LOCATION: Cytoplasm. Cytoplasm, perinuclear region. Membrane; Peripheral membrane protein. Cytoplasmic vesicle, clathrin-coated vesicle. Note=Found throughout the cell, with the exception of the cell surface. Concentrated in the perinuclear region and associated with clathrin-coated vesicles close to the trans-Golgi network.	Cytoplasm
O43681	ASNA_HUMAN	reviewed	ATPase ASNA1 (EC 3.6.-.-) (Arsenical pump-driving ATPase) (Arsenite-stimulated ATPase) (Transmembrane domain recognition complex 40 kDa ATPase subunit) (hARSA-I) (hASNA-I)	ASNA1 ARSA TRC40	Homo sapiens (Human)	348	SUBCELLULAR LOCATION: Cytoplasm. Endoplasmic reticulum. Nucleus, nucleolus.	Cytoplasm
P53618	COPB_HUMAN	reviewed	Coatomer subunit beta (Beta-coat protein) (Beta-COP)	COPB1 COPB MSTP026	Homo sapiens (Human)	953	SUBCELLULAR LOCATION: Cytoplasm. Golgi apparatus membrane {ECO:0000269|PubMed:11056392, ECO:0000269|PubMed:17451557, ECO:0000269|PubMed:7573041}; Peripheral membrane protein {ECO:0000269|PubMed:17451557, ECO:0000269|PubMed:18385291, ECO:0000269|PubMed:20056612}; Cytoplasmic side {ECO:0000305}. Cytoplasmic vesicle, COPI-coated vesicle membrane; Peripheral membrane protein {ECO:0000305}; Cytoplasmi…	Cytoplasm
Q9BUL8	PDC10_HUMAN	reviewed	Programmed cell death protein 10 (Cerebral cavernous malformations 3 protein) (TF-1 cell apoptosis-related protein 15)	PDCD10 CCM3 TFAR15	Homo sapiens (Human)	212	SUBCELLULAR LOCATION: Cytoplasm. Golgi apparatus membrane; Peripheral membrane protein; Cytoplasmic side. Cell membrane; Peripheral membrane protein; Cytoplasmic side. Note=Partially co-localizes with endogenous PXN at the leading edges of migrating cells.	Cytoplasm
Q13501	SQSTM_HUMAN	reviewed	Sequestosome-1 (EBI3-associated protein of 60 kDa) (EBIAP) (p60) (Phosphotyrosine-independent ligand for the Lck SH2 domain of 62 kDa) (Ubiquitin-binding protein p62)	SQSTM1 ORCA OSIL	Homo sapiens (Human)	440	SUBCELLULAR LOCATION: Cytoplasm. Late endosome. Lysosome. Cytoplasmic vesicle, autophagosome. Nucleus. Endoplasmic reticulum. Cytoplasm, P-body. Note=Sarcomere (By similarity). In cardiac muscles localizes to the sarcomeric band (By similarity). Commonly found in inclusion bodies containing polyubiquitinated protein aggregates. In neurodegenerative diseases, detected in Lewy bodies in Parkinson d…	Cytoplasm
Q70J99	UN13D_HUMAN	reviewed	Protein unc-13 homolog D (Munc13-4)	UNC13D	Homo sapiens (Human)	1090	SUBCELLULAR LOCATION: Cytoplasm. Membrane; Peripheral membrane protein. Late endosome. Recycling endosome. Lysosome. Note=Colocalizes with cytotoxic granules at the plasma membrane. Localizes to endosomal exocytic vesicles.	Cytoplasm
Q12849	GRSF1_HUMAN	reviewed	G-rich sequence factor 1 (GRSF-1)	GRSF1	Homo sapiens (Human)	480	SUBCELLULAR LOCATION: Cytoplasm. Mitochondrion matrix, mitochondrion nucleoid {ECO:0000269|PubMed:25683715}. Note=Localizes to mitochondrial RNA granules found in close proximity to the mitochondrial nucleoids. {ECO:0000269|PubMed:25683715}.	Cytoplasm
Q99536	VAT1_HUMAN	reviewed	Synaptic vesicle membrane protein VAT-1 homolog (EC 1.-.-.-)	VAT1	Homo sapiens (Human)	393	SUBCELLULAR LOCATION: Cytoplasm. Mitochondrion outer membrane; Peripheral membrane protein. Note=The majority is localized in the cytoplasm and a small amount is associated with mitochondria. {ECO:0000250}.	Cytoplasm
Q8TCS8	PNPT1_HUMAN	reviewed	Polyribonucleotide nucleotidyltransferase 1, mitochondrial (EC 2.7.7.8) (3'-5' RNA exonuclease OLD35) (PNPase old-35) (Polynucleotide phosphorylase 1) (PNPase 1) (Polynucleotide phosphorylase-like protein)	PNPT1 PNPASE	Homo sapiens (Human)	783	SUBCELLULAR LOCATION: Cytoplasm. Mitochondrion. Mitochondrion intermembrane space; Peripheral membrane protein.	Cytoplasm
Q96DH6	MSI2H_HUMAN	reviewed	RNA-binding protein Musashi homolog 2 (Musashi-2)	MSI2	Homo sapiens (Human)	328	SUBCELLULAR LOCATION: Cytoplasm. Note=Associated with polysomes. {ECO:0000250}.	Cytoplasm
Q16222	UAP1_HUMAN	reviewed	UDP-N-acetylhexosamine pyrophosphorylase (Antigen X) (AGX) (Sperm-associated antigen 2) [Includes: UDP-N-acetylgalactosamine pyrophosphorylase (EC 2.7.7.83) (AGX-1); UDP-N-acetylglucosamine pyrophosphorylase (EC 2.7.7.23) (AGX-2)]	UAP1 SPAG2	Homo sapiens (Human)	522	SUBCELLULAR LOCATION: Cytoplasm. Note=In spermatozoa, localized to the principal piece of the tail, the neck region of the head and to a lesser extent, the midpiece of the tail.	Cytoplasm
P30520	PURA2_HUMAN	reviewed	Adenylosuccinate synthetase isozyme 2 (AMPSase 2) (AdSS 2) (EC 6.3.4.4) (Adenylosuccinate synthetase, acidic isozyme) (Adenylosuccinate synthetase, liver isozyme) (L-type adenylosuccinate synthetase) (IMP--aspartate ligase 2)	ADSS ADSS2	Homo sapiens (Human)	456	SUBCELLULAR LOCATION: Cytoplasm. Note=Partially associated with particulate fractions.	Cytoplasm
Q13126	MTAP_HUMAN	reviewed	S-methyl-5'-thioadenosine phosphorylase (EC 2.4.2.28) (5'-methylthioadenosine phosphorylase) (MTA phosphorylase) (MTAP) (MTAPase)	MTAP MSAP	Homo sapiens (Human)	283	SUBCELLULAR LOCATION: Cytoplasm. Nucleus {ECO:0000255|HAMAP-Rule:MF_03155}.	Cytoplasm
P40763	STAT3_HUMAN	reviewed	Signal transducer and activator of transcription 3 (Acute-phase response factor)	STAT3 APRF	Homo sapiens (Human)	770	SUBCELLULAR LOCATION: Cytoplasm. Nucleus {ECO:0000269|PubMed:28065600}. Note=Shuttles between the nucleus and the cytoplasm. Translocated into the nucleus upon tyrosine phosphorylation and dimerization, in response to signaling by activated FGFR1, FGFR2, FGFR3 or FGFR4. Constitutive nuclear presence is independent of tyrosine phosphorylation. Predominantly present in the cytoplasm without stimuli…	Cytoplasm
Q9UIA9	XPO7_HUMAN	reviewed	Exportin-7 (Exp7) (Ran-binding protein 16)	XPO7 KIAA0745 RANBP16	Homo sapiens (Human)	1087	SUBCELLULAR LOCATION: Cytoplasm. Nucleus {ECO:0000305}. Nucleus, nuclear pore complex {ECO:0000305}. Note=Shuttles between the nucleus and the cytoplasm. {ECO:0000305}.	Cytoplasm
Q9UHI6	DDX20_HUMAN	reviewed	Probable ATP-dependent RNA helicase DDX20 (EC 3.6.4.13) (Component of gems 3) (DEAD box protein 20) (DEAD box protein DP 103) (Gemin-3)	DDX20 DP103 GEMIN3	Homo sapiens (Human)	824	SUBCELLULAR LOCATION: Cytoplasm. Nucleus, gem. Note=Localized in subnuclear structures next to coiled bodies, called Gemini of Cajal bodies (Gems).	Cytoplasm
Q9UMR2	DD19B_HUMAN	reviewed	ATP-dependent RNA helicase DDX19B (EC 3.6.4.13) (DEAD box RNA helicase DEAD5) (DEAD box protein 19B)	DDX19B DBP5 DDX19 TDBP	Homo sapiens (Human)	479	SUBCELLULAR LOCATION: Cytoplasm. Nucleus, nuclear pore complex. Nucleus membrane; Peripheral membrane protein; Cytoplasmic side. Note=Nuclear pore complex cytoplasmic fibrils.	Cytoplasm
Q02880	TOP2B_HUMAN	reviewed	DNA topoisomerase 2-beta (EC 5.99.1.3) (DNA topoisomerase II, beta isozyme)	TOP2B	Homo sapiens (Human)	1626	SUBCELLULAR LOCATION: Cytoplasm. Nucleus, nucleolus.	Cytoplasm
P43686	PRS6B_HUMAN	reviewed	26S proteasome regulatory subunit 6B (26S proteasome AAA-ATPase subunit RPT3) (MB67-interacting protein) (MIP224) (Proteasome 26S subunit ATPase 4) (Tat-binding protein 7) (TBP-7)	PSMC4 MIP224 TBP7	Homo sapiens (Human)	418	SUBCELLULAR LOCATION: Cytoplasm. Nucleus.	Cytoplasm
Q7Z5L9	I2BP2_HUMAN	reviewed	Interferon regulatory factor 2-binding protein 2 (IRF-2-binding protein 2) (IRF-2BP2)	IRF2BP2	Homo sapiens (Human)	587	SUBCELLULAR LOCATION: Cytoplasm. Nucleus.	Cytoplasm
P14635	CCNB1_HUMAN	reviewed	G2/mitotic-specific cyclin-B1	CCNB1 CCNB	Homo sapiens (Human)	433	SUBCELLULAR LOCATION: Cytoplasm. Nucleus. Cytoplasm, cytoskeleton, microtubule organizing center, centrosome.	Cytoplasm
Q9BT78	CSN4_HUMAN	reviewed	COP9 signalosome complex subunit 4 (SGN4) (Signalosome subunit 4) (JAB1-containing signalosome subunit 4)	COPS4 CSN4	Homo sapiens (Human)	406	SUBCELLULAR LOCATION: Cytoplasm. Nucleus. Cytoplasmic vesicle, secretory vesicle, synaptic vesicle.	Cytoplasm
P11802	CDK4_HUMAN	reviewed	Cyclin-dependent kinase 4 (EC 2.7.11.22) (Cell division protein kinase 4) (PSK-J3)	CDK4	Homo sapiens (Human)	303	SUBCELLULAR LOCATION: Cytoplasm. Nucleus. Membrane. Note=Cytoplasmic when non-complexed. Forms a cyclin D-CDK4 complex in the cytoplasm as cells progress through G(1) phase. The complex accumulates on the nuclear membrane and enters the nucleus on transition from G(1) to S phase. Also present in nucleoli and heterochromatin lumps. Colocalizes with RB1 after release into the nucleus.	Cytoplasm
Q9Y6E0	STK24_HUMAN	reviewed	Serine/threonine-protein kinase 24 (EC 2.7.11.1) (Mammalian STE20-like protein kinase 3) (MST-3) (STE20-like kinase MST3) [Cleaved into: Serine/threonine-protein kinase 24 36 kDa subunit (Mammalian STE20-like protein kinase 3 N-terminal) (MST3/N); Serine/threonine-protein kinase 24 12 kDa subunit (Mammalian STE20-like protein kinase 3 C-terminal) (MST3/C)]	STK24 MST3 STK3	Homo sapiens (Human)	443	SUBCELLULAR LOCATION: Cytoplasm. Nucleus. Membrane. Note=The truncated form (MST3/N) translocates to the nucleus. Colocalizes with STK38L in the membrane.	Cytoplasm
Q09472	EP300_HUMAN	reviewed	Histone acetyltransferase p300 (p300 HAT) (EC 2.3.1.48) (E1A-associated protein p300)	EP300 P300	Homo sapiens (Human)	2414	SUBCELLULAR LOCATION: Cytoplasm. Nucleus. Note=In the presence of ALX1 relocalizes from the cytoplasm to the nucleus. Colocalizes with ROCK2 in the nucleus.	Cytoplasm
Q9Y3F4	STRAP_HUMAN	reviewed	Serine-threonine kinase receptor-associated protein (MAP activator with WD repeats) (UNR-interacting protein) (WD-40 repeat protein PT-WD)	STRAP MAWD UNRIP	Homo sapiens (Human)	350	SUBCELLULAR LOCATION: Cytoplasm. Nucleus. Note=Localized predominantly in the cytoplasm but also found in the nucleus.	Cytoplasm
P61962	DCAF7_HUMAN	reviewed	DDB1- and CUL4-associated factor 7 (WD repeat-containing protein 68) (WD repeat-containing protein An11 homolog)	DCAF7 HAN11 WDR68	Homo sapiens (Human)	342	SUBCELLULAR LOCATION: Cytoplasm. Nucleus. Note=Overexpression of DIAHP1 or active RHOA causes translocation from the nucleus to cytoplasm.	Cytoplasm
Q16531	DDB1_HUMAN	reviewed	DNA damage-binding protein 1 (DDB p127 subunit) (DNA damage-binding protein a) (DDBa) (Damage-specific DNA-binding protein 1) (HBV X-associated protein 1) (XAP-1) (UV-damaged DNA-binding factor) (UV-damaged DNA-binding protein 1) (UV-DDB 1) (XPE-binding factor) (XPE-BF) (Xeroderma pigmentosum group E-complementing protein) (XPCe)	DDB1 XAP1	Homo sapiens (Human)	1140	SUBCELLULAR LOCATION: Cytoplasm. Nucleus. Note=Primarily cytoplasmic. Translocates to the nucleus following UV irradiation and subsequently accumulates at sites of DNA damage.	Cytoplasm
Q92793	CBP_HUMAN	reviewed	CREB-binding protein (EC 2.3.1.48)	CREBBP CBP	Homo sapiens (Human)	2442	SUBCELLULAR LOCATION: Cytoplasm. Nucleus. Note=Recruited to nuclear bodies by SS18L1/CREST. In the presence of ALX1 relocalizes from the cytoplasm to the nucleus.	Cytoplasm
Q9UBT2	SAE2_HUMAN	reviewed	SUMO-activating enzyme subunit 2 (EC 6.3.2.-) (Anthracycline-associated resistance ARX) (Ubiquitin-like 1-activating enzyme E1B) (Ubiquitin-like modifier-activating enzyme 2)	UBA2 SAE2 UBLE1B HRIHFB2115	Homo sapiens (Human)	640	SUBCELLULAR LOCATION: Cytoplasm. Nucleus. Note=Shuttles between the cytoplasm and the nucleus, sumoylation is required either for nuclear translocation or nuclear retention.	Cytoplasm
Q96HR8	NAF1_HUMAN	reviewed	H/ACA ribonucleoprotein complex non-core subunit NAF1 (hNAF1)	NAF1	Homo sapiens (Human)	494	SUBCELLULAR LOCATION: Cytoplasm. Nucleus. Note=Shuttles between the cytoplasm and the nucleus. Absent from the nucleolus (By similarity). {ECO:0000250}.	Cytoplasm
P42226	STAT6_HUMAN	reviewed	Signal transducer and activator of transcription 6 (IL-4 Stat)	STAT6	Homo sapiens (Human)	847	SUBCELLULAR LOCATION: Cytoplasm. Nucleus. Note=Translocated into the nucleus in response to phosphorylation.	Cytoplasm
Q7LG56	RIR2B_HUMAN	reviewed	Ribonucleoside-diphosphate reductase subunit M2 B (EC 1.17.4.1) (TP53-inducible ribonucleotide reductase M2 B) (p53-inducible ribonucleotide reductase small subunit 2-like protein) (p53R2)	RRM2B P53R2	Homo sapiens (Human)	351	SUBCELLULAR LOCATION: Cytoplasm. Nucleus. Note=Translocates from cytoplasm to nucleus in response to DNA damage.	Cytoplasm
P17931	LEG3_HUMAN	reviewed	Galectin-3 (Gal-3) (35 kDa lectin) (Carbohydrate-binding protein 35) (CBP 35) (Galactose-specific lectin 3) (Galactoside-binding protein) (GALBP) (IgE-binding protein) (L-31) (Laminin-binding protein) (Lectin L-29) (Mac-2 antigen)	LGALS3 MAC2	Homo sapiens (Human)	250	SUBCELLULAR LOCATION: Cytoplasm. Nucleus. Secreted. Note=Secreted by a non-classical secretory pathway and associates with the cell surface.	Cytoplasm
Q71RC2	LARP4_HUMAN	reviewed	La-related protein 4 (La ribonucleoprotein domain family member 4)	LARP4 PP13296	Homo sapiens (Human)	724	SUBCELLULAR LOCATION: Cytoplasmic granule {ECO:0000269|PubMed:21098120}. Cytoplasm, cytosol {ECO:0000269|PubMed:21098120, ECO:0000269|PubMed:27615744}. Note=Localized throughout the cytosol. Partially localized in stress granules in response to arsenite treatment. {ECO:0000269|PubMed:21098120}.	Cytoplasm
B2RAU5	B2RAU5_HUMAN	unreviewed	Sorting nexin		Homo sapiens (Human)	595	SUBCELLULAR LOCATION: Cytoplasmic vesicle membrane {ECO:0000256|PIRNR:PIRNR027744}.	Cytoplasm
B0YIW5	B0YIW5_HUMAN	unreviewed	Coatomer subunit delta	ARCN1 hCG_40220	Homo sapiens (Human)	511	SUBCELLULAR LOCATION: Cytoplasmic vesicle, COPI-coated vesicle membrane {ECO:0000256|RuleBase:RU364018}; Peripheral membrane protein {ECO:0000256|RuleBase:RU364018}; Cytoplasmic side {ECO:0000256|RuleBase:RU364018}.; SUBCELLULAR LOCATION: Golgi apparatus membrane {ECO:0000256|RuleBase:RU364018}; Peripheral membrane protein {ECO:0000256|RuleBase:RU364018}; Cytoplasmic side {ECO:0000256|RuleBase:RU…	Cytoplasm
P53992	SC24C_HUMAN	reviewed	Protein transport protein Sec24C (SEC24-related protein C)	SEC24C KIAA0079	Homo sapiens (Human)	1094	SUBCELLULAR LOCATION: Cytoplasmic vesicle, COPII-coated vesicle membrane {ECO:0000269|PubMed:10075675, ECO:0000269|PubMed:10329445}; Peripheral membrane protein {ECO:0000269|PubMed:10075675}; Cytoplasmic side {ECO:0000269|PubMed:10075675}. Endoplasmic reticulum membrane {ECO:0000269|PubMed:10075675, ECO:0000269|PubMed:10329445}; Peripheral membrane protein {ECO:0000269|PubMed:10075675}; Cytoplasm…	Cytoplasm
O95487	SC24B_HUMAN	reviewed	Protein transport protein Sec24B (SEC24-related protein B)	SEC24B	Homo sapiens (Human)	1268	SUBCELLULAR LOCATION: Cytoplasmic vesicle, COPII-coated vesicle membrane {ECO:0000269|PubMed:10075675}; Peripheral membrane protein {ECO:0000305|PubMed:10075675}; Cytoplasmic side {ECO:0000305|PubMed:10075675}. Endoplasmic reticulum membrane {ECO:0000269|PubMed:10075675}; Peripheral membrane protein {ECO:0000269|PubMed:10075675}; Cytoplasmic side {ECO:0000269|PubMed:10075675}. Cytoplasm, cytosol …	Cytoplasm
O94855	SC24D_HUMAN	reviewed	Protein transport protein Sec24D (SEC24-related protein D)	SEC24D KIAA0755	Homo sapiens (Human)	1032	SUBCELLULAR LOCATION: Cytoplasmic vesicle, COPII-coated vesicle membrane {ECO:0000269|PubMed:10329445}; Peripheral membrane protein {ECO:0000250|UniProtKB:P53992}; Cytoplasmic side {ECO:0000250|UniProtKB:P53992}. Endoplasmic reticulum membrane {ECO:0000305|PubMed:10329445}; Peripheral membrane protein {ECO:0000250|UniProtKB:P53992}; Cytoplasmic side {ECO:0000250|UniProtKB:P53992}. Cytoplasm, cyto…	Cytoplasm
O95486	SC24A_HUMAN	reviewed	Protein transport protein Sec24A (SEC24-related protein A)	SEC24A	Homo sapiens (Human)	1093	SUBCELLULAR LOCATION: Cytoplasmic vesicle, COPII-coated vesicle membrane {ECO:0000305|PubMed:17499046}; Peripheral membrane protein {ECO:0000305|PubMed:17499046}; Cytoplasmic side {ECO:0000305|PubMed:17499046}. Endoplasmic reticulum membrane {ECO:0000305|PubMed:17499046}; Peripheral membrane protein {ECO:0000305|PubMed:17499046}; Cytoplasmic side {ECO:0000305|PubMed:17499046}. Cytoplasm, cytosol …	Cytoplasm
Q9Y6Y8	S23IP_HUMAN	reviewed	SEC23-interacting protein (p125)	SEC23IP MSTP053	Homo sapiens (Human)	1000	SUBCELLULAR LOCATION: Cytoplasmic vesicle, COPII-coated vesicle membrane; Peripheral membrane protein; Cytoplasmic side. Endoplasmic reticulum {ECO:0000305}.	Cytoplasm
A0A087WXS7	A0A087WXS7_HUMAN	unreviewed	ATPase ASNA1 (EC 3.6.-.-) (Arsenical pump-driving ATPase) (Arsenite-stimulated ATPase)	ASNA1	Homo sapiens (Human)	331	SUBCELLULAR LOCATION: Endoplasmic reticulum {ECO:0000256|SAAS:SAAS00846961}.	Cytoplasm
Q00005	2ABB_HUMAN	reviewed	Serine/threonine-protein phosphatase 2A 55 kDa regulatory subunit B beta isoform (PP2A subunit B isoform B55-beta) (PP2A subunit B isoform PR55-beta) (PP2A subunit B isoform R2-beta) (PP2A subunit B isoform beta)	PPP2R2B	Homo sapiens (Human)	443	SUBCELLULAR LOCATION: Isoform 1: Cytoplasm {ECO:0000250}. Cytoplasm, cytoskeleton {ECO:0000250}. Membrane {ECO:0000250}.; SUBCELLULAR LOCATION: Isoform 2: Cytoplasm {ECO:0000250}. Mitochondrion {ECO:0000250}. Mitochondrion outer membrane {ECO:0000250}. Note=Under basal conditions, localizes to both cytosolic and mitochondrial compartments. Relocalizes from the cytosolic to the mitochondrial compa…	Cytoplasm
P55265	DSRAD_HUMAN	reviewed	Double-stranded RNA-specific adenosine deaminase (DRADA) (EC 3.5.4.37) (136 kDa double-stranded RNA-binding protein) (p136) (Interferon-inducible protein 4) (IFI-4) (K88DSRBP)	ADAR ADAR1 DSRAD G1P1 IFI4	Homo sapiens (Human)	1226	SUBCELLULAR LOCATION: Isoform 1: Cytoplasm {ECO:0000269|PubMed:7565688}. Nucleus {ECO:0000269|PubMed:24753571, ECO:0000269|PubMed:7565688}. Note=Shuttles between the cytoplasm and nucleus (PubMed:7565688, PubMed:24753571). Nuclear import is mediated by TNPO1 (PubMed:24753571). {ECO:0000269|PubMed:24753571, ECO:0000269|PubMed:7565688}.; SUBCELLULAR LOCATION: Isoform 5: Cytoplasm {ECO:0000269|PubMe…	Cytoplasm
P35221	CTNA1_HUMAN	reviewed	Catenin alpha-1 (Alpha E-catenin) (Cadherin-associated protein) (Renal carcinoma antigen NY-REN-13)	CTNNA1	Homo sapiens (Human)	906	SUBCELLULAR LOCATION: Isoform 1: Cytoplasm, cytoskeleton. Cell junction, adherens junction. Cell membrane; Peripheral membrane protein; Cytoplasmic side. Cell junction. Note=Found at cell-cell boundaries and probably at cell-matrix boundaries.; SUBCELLULAR LOCATION: Isoform 3: Cell membrane {ECO:0000269|PubMed:21708131}; Peripheral membrane protein {ECO:0000269|PubMed:21708131}; Cytoplasmic side …	Cytoplasm
O94925	GLSK_HUMAN	reviewed	Glutaminase kidney isoform, mitochondrial (GLS) (EC 3.5.1.2) (K-glutaminase) (L-glutamine amidohydrolase)	GLS GLS1 KIAA0838	Homo sapiens (Human)	669	SUBCELLULAR LOCATION: Isoform 1: Cytoplasm, cytosol.; SUBCELLULAR LOCATION: Isoform 3: Mitochondrion.	Cytoplasm
P36871	PGM1_HUMAN	reviewed	Phosphoglucomutase-1 (PGM 1) (EC 5.4.2.2) (Glucose phosphomutase 1)	PGM1	Homo sapiens (Human)	562	SUBCELLULAR LOCATION: Isoform 1: Cytoplasm.	Cytoplasm
Q7Z2W4	ZCCHV_HUMAN	reviewed	Zinc finger CCCH-type antiviral protein 1 (ADP-ribosyltransferase diphtheria toxin-like 13) (ARTD13) (Zinc finger CCCH domain-containing protein 2) (Zinc finger antiviral protein) (ZAP)	ZC3HAV1 ZC3HDC2 PRO1677	Homo sapiens (Human)	902	SUBCELLULAR LOCATION: Isoform 1: Cytoplasm. Nucleus. Note=Localizes in the cytoplasm at steady state, but shuttles between nucleus and cytoplasm in a XPO1-dependent manner. {ECO:0000250}.; SUBCELLULAR LOCATION: Isoform 2: Cytoplasm.	Cytoplasm
Q8N543	OGFD1_HUMAN	reviewed	Prolyl 3-hydroxylase OGFOD1 (EC 1.14.11.-) (2-oxoglutarate and iron-dependent oxygenase domain-containing protein 1) (Termination and polyadenylation 1 homolog)	OGFOD1 KIAA1612 TPA1	Homo sapiens (Human)	542	SUBCELLULAR LOCATION: Isoform 1: Cytoplasm. Nucleus. Note=Mainly nuclear. A portion relocalizes to cytoplasmic stress granules upon stress.; SUBCELLULAR LOCATION: Isoform 2: Cytoplasm.	Cytoplasm
Q8NE71	ABCF1_HUMAN	reviewed	ATP-binding cassette sub-family F member 1 (ATP-binding cassette 50) (TNF-alpha-stimulated ABC protein)	ABCF1 ABC50	Homo sapiens (Human)	845	SUBCELLULAR LOCATION: Isoform 2: Cytoplasm {ECO:0000269|PubMed:19570978}. Nucleus, nucleoplasm {ECO:0000269|PubMed:19570978}. Nucleus envelope {ECO:0000269|PubMed:19570978}.	Cytoplasm
P04150	GCR_HUMAN	reviewed	Glucocorticoid receptor (GR) (Nuclear receptor subfamily 3 group C member 1)	NR3C1 GRL	Homo sapiens (Human)	777	SUBCELLULAR LOCATION: Isoform Alpha: Cytoplasm {ECO:0000269|PubMed:15769988, ECO:0000269|PubMed:17635946, ECO:0000269|PubMed:18838540, ECO:0000269|PubMed:27120390, ECO:0000269|PubMed:8621628}. Nucleus {ECO:0000269|PubMed:15769988, ECO:0000269|PubMed:17635946, ECO:0000269|PubMed:18838540, ECO:0000269|PubMed:27120390, ECO:0000269|PubMed:8621628}. Mitochondrion {ECO:0000269|PubMed:21664385}. Cytopla…	Cytoplasm
Q8WWM7	ATX2L_HUMAN	reviewed	Ataxin-2-like protein (Ataxin-2 domain protein) (Ataxin-2-related protein)	ATXN2L A2D A2LG A2LP A2RP	Homo sapiens (Human)	1075	SUBCELLULAR LOCATION: Membrane {ECO:0000269|PubMed:11784712}; Peripheral membrane protein {ECO:0000269|PubMed:11784712}. Cytoplasm {ECO:0000269|PubMed:23209657}. Nucleus speckle {ECO:0000269|PubMed:23209657}. Cytoplasmic granule {ECO:0000269|PubMed:23209657}. Note=Predominantly cytoplasmic but is also detected in nuclear speckles (PubMed:23209657). Component of cytoplasmic stress granules (PubMed…	Cytoplasm
Q86YV9	HPS6_HUMAN	reviewed	Hermansky-Pudlak syndrome 6 protein (Ruby-eye protein homolog) (Ru)	HPS6	Homo sapiens (Human)	775	SUBCELLULAR LOCATION: Microsome membrane {ECO:0000269|PubMed:15030569}. Cytoplasm, cytosol {ECO:0000269|PubMed:15030569}. Early endosome membrane {ECO:0000269|PubMed:16837549}. Lysosome membrane {ECO:0000269|PubMed:25189619}.	Cytoplasm
Q9BYT8	NEUL_HUMAN	reviewed	Neurolysin, mitochondrial (EC 3.4.24.16) (Angiotensin-binding protein) (Microsomal endopeptidase) (MEP) (Mitochondrial oligopeptidase M) (Neurotensin endopeptidase)	NLN AGTBP KIAA1226	Homo sapiens (Human)	704	SUBCELLULAR LOCATION: Mitochondrion intermembrane space {ECO:0000250}. Cytoplasm {ECO:0000250}.	Cytoplasm
Q8IWA4	MFN1_HUMAN	reviewed	Mitofusin-1 (EC 3.6.5.-) (Fzo homolog) (Transmembrane GTPase MFN1)	MFN1	Homo sapiens (Human)	741	SUBCELLULAR LOCATION: Mitochondrion outer membrane {ECO:0000269|PubMed:12759376, ECO:0000305|PubMed:27920125}; Multi-pass membrane protein {ECO:0000305|PubMed:12759376}.; SUBCELLULAR LOCATION: Isoform 2: Cytoplasm {ECO:0000269|PubMed:11751411}.	Cytoplasm
Q9Y512	SAM50_HUMAN	reviewed	Sorting and assembly machinery component 50 homolog (Transformation-related gene 3 protein) (TRG-3)	SAMM50 SAM50 CGI-51 TRG3	Homo sapiens (Human)	469	SUBCELLULAR LOCATION: Mitochondrion outer membrane {ECO:0000269|PubMed:15644312}; Multi-pass membrane protein. Cytoplasm {ECO:0000250|UniProtKB:Q6AXV4}. Mitochondrion {ECO:0000269|PubMed:25781180}.	Cytoplasm
Q53EL6	PDCD4_HUMAN	reviewed	Programmed cell death protein 4 (Neoplastic transformation inhibitor protein) (Nuclear antigen H731-like) (Protein 197/15a)	PDCD4 H731	Homo sapiens (Human)	469	SUBCELLULAR LOCATION: Nucleus {ECO:0000250|UniProtKB:Q61823}. Cytoplasm {ECO:0000250|UniProtKB:Q61823}. Note=Shuttles between the nucleus and cytoplasm (By similarity). Predominantly nuclear under normal growth conditions, and when phosphorylated at Ser-457 (PubMed:16357133). {ECO:0000269|PubMed:16357133}.	Nucleus
Q96PU8	QKI_HUMAN	reviewed	Protein quaking (Hqk) (HqkI)	QKI HKQ	Homo sapiens (Human)	341	SUBCELLULAR LOCATION: Nucleus {ECO:0000250}. Cytoplasm {ECO:0000250}.	Nucleus
Q9NWB1	RFOX1_HUMAN	reviewed	RNA binding protein fox-1 homolog 1 (Ataxin-2-binding protein 1) (Fox-1 homolog A) (Hexaribonucleotide-binding protein 1)	RBFOX1 A2BP A2BP1 FOX1 HRNBP1	Homo sapiens (Human)	397	SUBCELLULAR LOCATION: Nucleus {ECO:0000250}. Cytoplasm {ECO:0000250}.	Nucleus
Q8IY67	RAVR1_HUMAN	reviewed	Ribonucleoprotein PTB-binding 1 (Protein raver-1)	RAVER1 KIAA1978	Homo sapiens (Human)	606	SUBCELLULAR LOCATION: Nucleus {ECO:0000250}. Cytoplasm {ECO:0000250}. Note=Nuclear, in perinucleolar structures. Shuttles between nucleus and cytoplasm. Cytoplasm, at focal contacts and cell-cell contacts. Associated with myotubes during muscle differentiation (By similarity). {ECO:0000250}.	Nucleus
Q9BTD8	RBM42_HUMAN	reviewed	RNA-binding protein 42 (RNA-binding motif protein 42)	RBM42	Homo sapiens (Human)	480	SUBCELLULAR LOCATION: Nucleus {ECO:0000250}. Cytoplasm {ECO:0000250}. Note=Upon stress response, localizes with HNRNPK in cytoplasmic aggregates of stalled translational preinitiation complexes called stress granules. {ECO:0000250}.	Nucleus
O14770	MEIS2_HUMAN	reviewed	Homeobox protein Meis2 (Meis1-related protein 1)	MEIS2 MRG1	Homo sapiens (Human)	477	SUBCELLULAR LOCATION: Nucleus {ECO:0000255|PROSITE-ProRule:PRU00108}. Cytoplasm, perinuclear region {ECO:0000250|UniProtKB:P97367}.	Nucleus
A0A0C4DGK8	A0A0C4DGK8_HUMAN	unreviewed	DNA-(apurinic or apyrimidinic site) lyase (EC 4.2.99.18) (Fragment)	APEX1	Homo sapiens (Human)	146	SUBCELLULAR LOCATION: Nucleus {ECO:0000256|RuleBase:RU362131}. Cytoplasm {ECO:0000256|RuleBase:RU362131}. Mitochondrion {ECO:0000256|RuleBase:RU362131}.	Nucleus
G3V359	G3V359_HUMAN	unreviewed	DNA-(apurinic or apyrimidinic site) lyase (EC 4.2.99.18) (Fragment)	APEX1	Homo sapiens (Human)	172	SUBCELLULAR LOCATION: Nucleus {ECO:0000256|RuleBase:RU362131}. Cytoplasm {ECO:0000256|RuleBase:RU362131}. Mitochondrion {ECO:0000256|RuleBase:RU362131}.	Nucleus
G3V3C7	G3V3C7_HUMAN	unreviewed	DNA-(apurinic or apyrimidinic site) lyase (EC 4.2.99.18) (Fragment)	APEX1	Homo sapiens (Human)	174	SUBCELLULAR LOCATION: Nucleus {ECO:0000256|RuleBase:RU362131}. Cytoplasm {ECO:0000256|RuleBase:RU362131}. Mitochondrion {ECO:0000256|RuleBase:RU362131}.	Nucleus
G3V3M6	G3V3M6_HUMAN	unreviewed	DNA-(apurinic or apyrimidinic site) lyase (EC 4.2.99.18) (Fragment)	APEX1	Homo sapiens (Human)	263	SUBCELLULAR LOCATION: Nucleus {ECO:0000256|RuleBase:RU362131}. Cytoplasm {ECO:0000256|RuleBase:RU362131}. Mitochondrion {ECO:0000256|RuleBase:RU362131}.	Nucleus
G3V5M0	G3V5M0_HUMAN	unreviewed	DNA-(apurinic or apyrimidinic site) lyase (EC 4.2.99.18) (Fragment)	APEX1	Homo sapiens (Human)	162	SUBCELLULAR LOCATION: Nucleus {ECO:0000256|RuleBase:RU362131}. Cytoplasm {ECO:0000256|RuleBase:RU362131}. Mitochondrion {ECO:0000256|RuleBase:RU362131}.	Nucleus
G3V5Q1	G3V5Q1_HUMAN	unreviewed	DNA-(apurinic or apyrimidinic site) lyase (EC 4.2.99.18) (Fragment)	APEX1	Homo sapiens (Human)	242	SUBCELLULAR LOCATION: Nucleus {ECO:0000256|RuleBase:RU362131}. Cytoplasm {ECO:0000256|RuleBase:RU362131}. Mitochondrion {ECO:0000256|RuleBase:RU362131}.	Nucleus
H7C4A8	H7C4A8_HUMAN	unreviewed	DNA-(apurinic or apyrimidinic site) lyase (EC 4.2.99.18) (Fragment)	APEX1	Homo sapiens (Human)	150	SUBCELLULAR LOCATION: Nucleus {ECO:0000256|RuleBase:RU362131}. Cytoplasm {ECO:0000256|RuleBase:RU362131}. Mitochondrion {ECO:0000256|RuleBase:RU362131}.	Nucleus
P61289	PSME3_HUMAN	reviewed	Proteasome activator complex subunit 3 (11S regulator complex subunit gamma) (REG-gamma) (Activator of multicatalytic protease subunit 3) (Ki nuclear autoantigen) (Proteasome activator 28 subunit gamma) (PA28g) (PA28gamma)	PSME3	Homo sapiens (Human)	254	SUBCELLULAR LOCATION: Nucleus {ECO:0000269|PubMed:10657252, ECO:0000269|PubMed:12629132}. Cytoplasm {ECO:0000250}. Note=Localizes to the cytoplasm during mitosis following nuclear envelope breakdown at this distinct stage of the cell cycle which allows its interaction with MAP3K3 kinase. {ECO:0000250}.	Nucleus
Q9P287	BCCIP_HUMAN	reviewed	BRCA2 and CDKN1A-interacting protein (P21- and CDK-associated protein 1) (Protein TOK-1)	BCCIP TOK1	Homo sapiens (Human)	314	SUBCELLULAR LOCATION: Nucleus {ECO:0000269|PubMed:10878006, ECO:0000269|PubMed:11313963, ECO:0000269|PubMed:15713648}. Cytoplasm, cytoskeleton, microtubule organizing center, centrosome, centriole {ECO:0000269|PubMed:28394342}. Cytoplasm, cytoskeleton, spindle pole {ECO:0000269|PubMed:28394342}. Note=Colocalizes with BRCA2 in discrete nuclear foci (PubMed:15713648). In interphase, preferential lo…	Nucleus
Q9NR56	MBNL1_HUMAN	reviewed	Muscleblind-like protein 1 (Triplet-expansion RNA-binding protein)	MBNL1 EXP KIAA0428 MBNL	Homo sapiens (Human)	388	SUBCELLULAR LOCATION: Nucleus {ECO:0000269|PubMed:10970838, ECO:0000269|PubMed:11590133, ECO:0000269|PubMed:11929853}. Cytoplasm {ECO:0000269|PubMed:18335541}. Cytoplasmic granule {ECO:0000269|PubMed:18335541}. Note=Localized with DDX1, TIAL1 and YBX1 in stress granules upon stress (PubMed:18335541). Localized in the cytoplasm of multinucleated myotubes (PubMed:18335541). Colocalizes with nuclear…	Nucleus
Q9NRR5	UBQL4_HUMAN	reviewed	Ubiquilin-4 (Ataxin-1 interacting ubiquitin-like protein) (A1Up) (Ataxin-1 ubiquitin-like-interacting protein A1U) (Connexin43-interacting protein of 75 kDa) (CIP75)	UBQLN4 C1orf6 CIP75 UBIN	Homo sapiens (Human)	601	SUBCELLULAR LOCATION: Nucleus {ECO:0000269|PubMed:11001934, ECO:0000269|PubMed:15280365}. Cytoplasm {ECO:0000269|PubMed:15280365}. Endoplasmic reticulum {ECO:0000250|UniProtKB:Q99NB8}. Cytoplasm, perinuclear region {ECO:0000250|UniProtKB:Q99NB8}. Cytoplasmic vesicle, autophagosome {ECO:0000269|PubMed:23459205}. Note=Colocalizes with the proteasome, both in nucleus and cytoplasm. {ECO:0000269|PubM…	Nucleus
Q9BZZ5	API5_HUMAN	reviewed	Apoptosis inhibitor 5 (API-5) (Antiapoptosis clone 11 protein) (AAC-11) (Cell migration-inducing gene 8 protein) (Fibroblast growth factor 2-interacting factor) (FIF) (Protein XAGL)	API5 MIG8	Homo sapiens (Human)	524	SUBCELLULAR LOCATION: Nucleus {ECO:0000269|PubMed:11075807}. Cytoplasm {ECO:0000269|PubMed:11075807}. Note=Mainly nuclear. Can also be cytoplasmic.; SUBCELLULAR LOCATION: Isoform 3: Cytoplasm.	Nucleus
Q16629	SRSF7_HUMAN	reviewed	Serine/arginine-rich splicing factor 7 (Splicing factor 9G8) (Splicing factor, arginine/serine-rich 7)	SRSF7 SFRS7	Homo sapiens (Human)	238	SUBCELLULAR LOCATION: Nucleus {ECO:0000269|PubMed:11336712}. Cytoplasm {ECO:0000269|PubMed:11336712}.	Nucleus
Q9HAV4	XPO5_HUMAN	reviewed	Exportin-5 (Exp5) (Ran-binding protein 21)	XPO5 KIAA1291 RANBP21	Homo sapiens (Human)	1204	SUBCELLULAR LOCATION: Nucleus {ECO:0000269|PubMed:11777942}. Cytoplasm {ECO:0000269|PubMed:11777942}. Note=Shuttles between the nucleus and the cytoplasm.	Nucleus
Q96Q15	SMG1_HUMAN	reviewed	Serine/threonine-protein kinase SMG1 (SMG-1) (hSMG-1) (EC 2.7.11.1) (61E3.4) (Lambda/iota protein kinase C-interacting protein) (Lambda-interacting protein)	SMG1 ATX KIAA0421 LIP	Homo sapiens (Human)	3661	SUBCELLULAR LOCATION: Nucleus {ECO:0000269|PubMed:15175154}. Cytoplasm {ECO:0000269|PubMed:15175154}.	Nucleus
Q9GZS3	WDR61_HUMAN	reviewed	WD repeat-containing protein 61 (Meiotic recombination REC14 protein homolog) (SKI8 homolog) (Ski8) [Cleaved into: WD repeat-containing protein 61, N-terminally processed]	WDR61	Homo sapiens (Human)	305	SUBCELLULAR LOCATION: Nucleus {ECO:0000269|PubMed:16024656}. Cytoplasm {ECO:0000305|PubMed:16024656}.	Nucleus
Q96JB5	CK5P3_HUMAN	reviewed	CDK5 regulatory subunit-associated protein 3 (CDK5 activator-binding protein C53) (LXXLL/leucine-zipper-containing ARF-binding protein) (Protein HSF-27)	CDK5RAP3 IC53 LZAP MSTP016 OK/SW-cl.114 PP1553	Homo sapiens (Human)	506	SUBCELLULAR LOCATION: Nucleus {ECO:0000269|PubMed:16173922}. Cytoplasm {ECO:0000269|PubMed:15790566, ECO:0000269|PubMed:16173922, ECO:0000269|PubMed:19223857}. Cytoplasm, cytoskeleton, microtubule organizing center, centrosome {ECO:0000269|PubMed:19223857}. Note=Colocalizes and associates with microtubules. {ECO:0000269|PubMed:23478299}.	Nucleus
Q6PJG6	BRAT1_HUMAN	reviewed	BRCA1-associated ATM activator 1 (BRCA1-associated protein required for ATM activation protein 1)	BRAT1 BAAT1 C7orf27	Homo sapiens (Human)	821	SUBCELLULAR LOCATION: Nucleus {ECO:0000269|PubMed:16452482, ECO:0000269|PubMed:25631046}. Cytoplasm {ECO:0000269|PubMed:25631046}. Note=Present at double strand breaks (DSBs)following ionizing radiation treatment. The ubiquitinated form localizes in the nucleus in a NDFIP1-dependent manner. {ECO:0000269|PubMed:16452482, ECO:0000269|PubMed:25631046}.	Nucleus
Q5D1E8	ZC12A_HUMAN	reviewed	Endoribonuclease ZC3H12A (EC 3.1.-.-) (Monocyte chemotactic protein-induced protein 1) (MCP-induced protein 1) (MCPIP-1) (Regnase-1) (Reg1) (Zinc finger CCCH domain-containing protein 12A)	ZC3H12A MCPIP MCPIP1	Homo sapiens (Human)	599	SUBCELLULAR LOCATION: Nucleus {ECO:0000269|PubMed:16574901}. Cytoplasm {ECO:0000269|PubMed:18178554, ECO:0000269|PubMed:19909337, ECO:0000269|PubMed:22055188}. Cytoplasm, P-body {ECO:0000269|PubMed:22055188, ECO:0000269|PubMed:26134560}. Rough endoplasmic reticulum membrane {ECO:0000250|UniProtKB:Q5D1E7}; Peripheral membrane protein {ECO:0000250|UniProtKB:Q5D1E7}; Cytoplasmic side {ECO:0000250|Un…	Nucleus
Q99729	ROAA_HUMAN	reviewed	Heterogeneous nuclear ribonucleoprotein A/B (hnRNP A/B) (APOBEC1-binding protein 1) (ABBP-1)	HNRNPAB ABBP1 HNRPAB	Homo sapiens (Human)	332	SUBCELLULAR LOCATION: Nucleus {ECO:0000269|PubMed:17289661}. Cytoplasm {ECO:0000269|PubMed:17289661}. Note=Localized in cytoplasmic mRNP granules containing untranslated mRNAs.	Nucleus
Q14839	CHD4_HUMAN	reviewed	Chromodomain-helicase-DNA-binding protein 4 (CHD-4) (EC 3.6.4.12) (ATP-dependent helicase CHD4) (Mi-2 autoantigen 218 kDa protein) (Mi2-beta)	CHD4	Homo sapiens (Human)	1912	SUBCELLULAR LOCATION: Nucleus {ECO:0000269|PubMed:17626165, ECO:0000269|PubMed:27616479}. Cytoplasm, cytoskeleton, microtubule organizing center, centrosome {ECO:0000269|PubMed:17626165}. Note=Associates with centrosomes in interphase. {ECO:0000250|UniProtKB:Q6PDQ2}.	Nucleus
Q12873	CHD3_HUMAN	reviewed	Chromodomain-helicase-DNA-binding protein 3 (CHD-3) (EC 3.6.4.12) (ATP-dependent helicase CHD3) (Mi-2 autoantigen 240 kDa protein) (Mi2-alpha) (Zinc finger helicase) (hZFH)	CHD3	Homo sapiens (Human)	2000	SUBCELLULAR LOCATION: Nucleus {ECO:0000269|PubMed:17626165}. Cytoplasm, cytoskeleton, microtubule organizing center, centrosome {ECO:0000269|PubMed:17626165}. Note=Associates with centrosomes in interphase and mitosis.	Nucleus
Q96MB7	HARB1_HUMAN	reviewed	Putative nuclease HARBI1 (EC 3.1.-.-) (Harbinger transposase-derived nuclease)	HARBI1 C11orf77	Homo sapiens (Human)	349	SUBCELLULAR LOCATION: Nucleus {ECO:0000269|PubMed:18339812}. Cytoplasm {ECO:0000269|PubMed:18339812}. Note=Interaction with NAIF1 promotes translocation to the nucleus.	Nucleus
Q92804	RBP56_HUMAN	reviewed	TATA-binding protein-associated factor 2N (68 kDa TATA-binding protein-associated factor) (TAF(II)68) (TAFII68) (RNA-binding protein 56)	TAF15 RBP56 TAF2N	Homo sapiens (Human)	592	SUBCELLULAR LOCATION: Nucleus {ECO:0000269|PubMed:19124016}. Cytoplasm {ECO:0000269|PubMed:19124016}. Note=Shuttles from the nucleus to the cytoplasm.	Nucleus
O43823	AKAP8_HUMAN	reviewed	A-kinase anchor protein 8 (AKAP-8) (A-kinase anchor protein 95 kDa) (AKAP 95)	AKAP8 AKAP95	Homo sapiens (Human)	692	SUBCELLULAR LOCATION: Nucleus {ECO:0000269|PubMed:19277197}. Nucleus matrix {ECO:0000269|PubMed:10601332}. Nucleus, nucleolus {ECO:0000269|PubMed:26683827}. Cytoplasm {ECO:0000250|UniProtKB:Q9DBR0}. Note=Associated with the nuclear matrix in interphase and redistributes mostly to chromatin at mitosis. However, mitotic chromatin localization has been questioned. Upon nuclear reassembly at the end …	Nucleus
Q969V6	MKL1_HUMAN	reviewed	MKL/myocardin-like protein 1 (Megakaryoblastic leukemia 1 protein) (Megakaryocytic acute leukemia protein) (Myocardin-related transcription factor A) (MRTF-A)	MKL1 KIAA1438 MAL	Homo sapiens (Human)	931	SUBCELLULAR LOCATION: Nucleus {ECO:0000269|PubMed:19350017, ECO:0000269|PubMed:24440334}. Cytoplasm {ECO:0000250}. Note=Binding to globular actin is required to maintain cytoplasmic localization. Nuclear localization is regulated by MICAL2, which mediates depolymerization of nuclear globular actin, promoting retention of MKL1 in the nucleus and subsequent formation of an active complex with SRF (…	Nucleus
Q68E01	INT3_HUMAN	reviewed	Integrator complex subunit 3 (Int3) (SOSS complex subunit A) (Sensor of single-strand DNA complex subunit A) (SOSS-A) (Sensor of ssDNA subunit A)	INTS3 C1orf193 C1orf60	Homo sapiens (Human)	1043	SUBCELLULAR LOCATION: Nucleus {ECO:0000269|PubMed:19605351, ECO:0000269|PubMed:19683501, ECO:0000269|PubMed:23904267}. Cytoplasm {ECO:0000269|PubMed:23904267}. Note=Localizes to nuclear foci following DNA damage.	Nucleus
Q99543	DNJC2_HUMAN	reviewed	DnaJ homolog subfamily C member 2 (M-phase phosphoprotein 11) (Zuotin-related factor 1) [Cleaved into: DnaJ homolog subfamily C member 2, N-terminally processed]	DNAJC2 MPHOSPH11 MPP11 ZRF1	Homo sapiens (Human)	621	SUBCELLULAR LOCATION: Nucleus {ECO:0000269|PubMed:21179169}. Cytoplasm, cytosol {ECO:0000269|PubMed:16002468, ECO:0000269|PubMed:21179169}.	Nucleus
Q9H7S9	ZN703_HUMAN	reviewed	Zinc finger protein 703 (Zinc finger elbow-related proline domain protein 1)	ZNF703 ZEPPO1 ZPO1	Homo sapiens (Human)	590	SUBCELLULAR LOCATION: Nucleus {ECO:0000269|PubMed:21328542, ECO:0000269|PubMed:21337521}. Cytoplasm {ECO:0000250}.	Nucleus
Q9Y3I0	RTCB_HUMAN	reviewed	tRNA-splicing ligase RtcB homolog (EC 6.5.1.3)	RTCB C22orf28 HSPC117	Homo sapiens (Human)	505	SUBCELLULAR LOCATION: Nucleus {ECO:0000269|PubMed:24608264}. Cytoplasm {ECO:0000255|HAMAP-Rule:MF_03144, ECO:0000269|PubMed:24608264}. Note=Enters into the nucleus in case of active transcription while it accumulates in cytosol when transcription level is low. {ECO:0000269|PubMed:24608264}.	Nucleus
Q92769	HDAC2_HUMAN	reviewed	Histone deacetylase 2 (HD2) (EC 3.5.1.98)	HDAC2	Homo sapiens (Human)	488	SUBCELLULAR LOCATION: Nucleus {ECO:0000269|PubMed:24970816}. Cytoplasm {ECO:0000269|PubMed:24970816}.	Nucleus
Q96PK6	RBM14_HUMAN	reviewed	RNA-binding protein 14 (Paraspeckle protein 2) (PSP2) (RNA-binding motif protein 14) (RRM-containing coactivator activator/modulator) (Synaptotagmin-interacting protein) (SYT-interacting protein)	RBM14 SIP	Homo sapiens (Human)	669	SUBCELLULAR LOCATION: Nucleus {ECO:0000269|PubMed:25385835}. Nucleus, nucleolus {ECO:0000269|PubMed:11790299}. Cytoplasm {ECO:0000269|PubMed:25385835}. Note=In punctate subnuclear structures often located adjacent to splicing speckles, called paraspeckles (PubMed:11790299). Cytoplasmic localization is crucial for its function in suppressing the formation of aberrant centriolar protein complexes (…	Nucleus
O95817	BAG3_HUMAN	reviewed	BAG family molecular chaperone regulator 3 (BAG-3) (Bcl-2-associated athanogene 3) (Bcl-2-binding protein Bis) (Docking protein CAIR-1)	BAG3 BIS	Homo sapiens (Human)	575	SUBCELLULAR LOCATION: Nucleus {ECO:0000269|PubMed:26159920}. Cytoplasm {ECO:0000269|PubMed:26159920}. Note=Colocalizes with HSF1 to the nucleus upon heat stress (PubMed:26159920). {ECO:0000269|PubMed:26159920}.	Nucleus
P24928	RPB1_HUMAN	reviewed	DNA-directed RNA polymerase II subunit RPB1 (RNA polymerase II subunit B1) (EC 2.7.7.6) (DNA-directed RNA polymerase II subunit A) (DNA-directed RNA polymerase III largest subunit) (RNA-directed RNA polymerase II subunit RPB1) (EC 2.7.7.48)	POLR2A POLR2	Homo sapiens (Human)	1970	SUBCELLULAR LOCATION: Nucleus {ECO:0000269|PubMed:26566685, ECO:0000269|PubMed:9852112}. Cytoplasm {ECO:0000269|PubMed:26566685}. Note=Hypophosphorylated form is mainly found in the cytoplasm, while the hyperphosphorylated and active form is nuclear. {ECO:0000269|PubMed:26566685}.	Nucleus
Q92879	CELF1_HUMAN	reviewed	CUGBP Elav-like family member 1 (CELF-1) (50 kDa nuclear polyadenylated RNA-binding protein) (Bruno-like protein 2) (CUG triplet repeat RNA-binding protein 1) (CUG-BP1) (CUG-BP- and ETR-3-like factor 1) (Deadenylation factor CUG-BP) (Embryo deadenylation element-binding protein homolog) (EDEN-BP homolog) (RNA-binding protein BRUNOL-2)	CELF1 BRUNOL2 CUGBP CUGBP1 NAB50	Homo sapiens (Human)	486	SUBCELLULAR LOCATION: Nucleus {ECO:0000269|PubMed:8948631}. Cytoplasm {ECO:0000269|PubMed:8948631}. Note=RNA-binding activity is detected in both nuclear and cytoplasmic compartments.	Nucleus
P62826	RAN_HUMAN	reviewed	GTP-binding nuclear protein Ran (Androgen receptor-associated protein 24) (GTPase Ran) (Ras-like protein TC4) (Ras-related nuclear protein)	RAN ARA24 OK/SW-cl.81	Homo sapiens (Human)	216	SUBCELLULAR LOCATION: Nucleus {ECO:0000269|PubMed:9822603}. Nucleus envelope {ECO:0000269|PubMed:9822603}. Cytoplasm {ECO:0000269|PubMed:9822603}. Melanosome {ECO:0000250|UniProtKB:P62827}. Note=Predominantly nuclear during interphase. Becomes dispersed throughout the cytoplasm during mitosis. Identified by mass spectrometry in melanosome fractions from stage I to stage IV. {ECO:0000250|UniProtKB…	Nucleus
Q15477	SKIV2_HUMAN	reviewed	Helicase SKI2W (Ski2) (EC 3.6.4.-) (Helicase-like protein) (HLP)	SKIV2L DDX13 SKI2W SKIV2 W	Homo sapiens (Human)	1246	SUBCELLULAR LOCATION: Nucleus {ECO:0000305}. Cytoplasm {ECO:0000305}.	Nucleus
Q8NF91	SYNE1_HUMAN	reviewed	Nesprin-1 (Enaptin) (KASH domain-containing protein 1) (KASH1) (Myocyte nuclear envelope protein 1) (Myne-1) (Nuclear envelope spectrin repeat protein 1) (Synaptic nuclear envelope protein 1) (Syne-1)	SYNE1 C6orf98 KIAA0796 KIAA1262 KIAA1756 MYNE1	Homo sapiens (Human)	8797	SUBCELLULAR LOCATION: Nucleus outer membrane {ECO:0000305}; Single-pass type IV membrane protein {ECO:0000305}; Cytoplasmic side {ECO:0000305}. Nucleus. Nucleus envelope. Cytoplasm, cytoskeleton. Cytoplasm, myofibril, sarcomere. Note=The largest part of the protein is cytoplasmic, while its C-terminal part is associated with the nuclear envelope, most probably the outer nuclear membrane. In skele…	Nucleus
P61011	SRP54_HUMAN	reviewed	Signal recognition particle 54 kDa protein (SRP54)	SRP54	Homo sapiens (Human)	504	SUBCELLULAR LOCATION: Nucleus speckle {ECO:0000269|PubMed:14729963}. Cytoplasm {ECO:0000269|PubMed:14729963}.	Nucleus
P49756	RBM25_HUMAN	reviewed	RNA-binding protein 25 (Arg/Glu/Asp-rich protein of 120 kDa) (RED120) (Protein S164) (RNA-binding motif protein 25) (RNA-binding region-containing protein 7)	RBM25 RNPC7	Homo sapiens (Human)	843	SUBCELLULAR LOCATION: Nucleus speckle. Cytoplasm. Note=Colocalizes predominantly, with SFRS2 and LUC7L3 splicing factors, in nuclear speckles. Cytoplasmic localization is faint.	Nucleus
Q9Y4W2	LAS1L_HUMAN	reviewed	Ribosomal biogenesis protein LAS1L (Protein LAS1 homolog)	LAS1L MSTP060	Homo sapiens (Human)	734	SUBCELLULAR LOCATION: Nucleus, nucleolus {ECO:0000269|PubMed:12429849, ECO:0000269|PubMed:20647540}. Nucleus, nucleoplasm {ECO:0000250}. Cytoplasm {ECO:0000250}. Note=Mainly found in the nucleoplasm, with low levels detected in the cytoplasmic and chromatin fractions (By similarity). Localizes mainly to the granular component, the region implicated in the later steps of rRNA processing and subuni…	Nucleus
O00567	NOP56_HUMAN	reviewed	Nucleolar protein 56 (Nucleolar protein 5A)	NOP56 NOL5A	Homo sapiens (Human)	594	SUBCELLULAR LOCATION: Nucleus, nucleolus. Cytoplasm {ECO:0000250}. Nucleus, nucleoplasm {ECO:0000305}.	Nucleus
Q12906	ILF3_HUMAN	reviewed	Interleukin enhancer-binding factor 3 (Double-stranded RNA-binding protein 76) (DRBP76) (M-phase phosphoprotein 4) (MPP4) (Nuclear factor associated with dsRNA) (NFAR) (Nuclear factor of activated T-cells 90 kDa) (NF-AT-90) (Translational control protein 80) (TCP80)	ILF3 DRBF MPHOSPH4 NF90	Homo sapiens (Human)	894	SUBCELLULAR LOCATION: Nucleus, nucleolus. Cytoplasm. Nucleus. Note=Localizes in the cytoplasm in response to viral dsRNA. The unphosphorylated form is retained in the nucleus by ILF2. Phosphorylation at Thr-188 and Thr-315 causes the dissociation of ILF2 from the ILF2-ILF3 complex resulting in a cytoplasmic sequestration of ILF3. Localized in cytoplasmic mRNP granules containing untranslated mRNA…	Nucleus
Q8WXF1	PSPC1_HUMAN	reviewed	Paraspeckle component 1 (Paraspeckle protein 1)	PSPC1 PSP1	Homo sapiens (Human)	523	SUBCELLULAR LOCATION: Nucleus, nucleolus. Nucleus matrix {ECO:0000250}. Cytoplasm {ECO:0000250}. Nucleus speckle. Note=In punctate subnuclear structures often located adjacent to splicing speckles, called paraspeckles. Colocalizes with NONO and SFPQ in paraspeckles and perinucleolar caps in an RNA-dependent manner. May cycle between paraspeckles and nucleolus. In telophase, when daughter nuclei f…	Nucleus
Q9BV38	WDR18_HUMAN	reviewed	WD repeat-containing protein 18	WDR18	Homo sapiens (Human)	432	SUBCELLULAR LOCATION: Nucleus, nucleoplasm {ECO:0000250}. Cytoplasm {ECO:0000250}. Note=Mainly found in the nucleoplasm, with low levels detected in the cytoplasmic and chromatin fractions. {ECO:0000250}.	Nucleus
Q9NXF1	TEX10_HUMAN	reviewed	Testis-expressed protein 10	TEX10 L18 Nbla10363	Homo sapiens (Human)	929	SUBCELLULAR LOCATION: Nucleus, nucleoplasm {ECO:0000250}. Cytoplasm {ECO:0000250}. Nucleus membrane {ECO:0000269|PubMed:12429849}; Multi-pass membrane protein {ECO:0000269|PubMed:12429849}. Nucleus, nucleolus {ECO:0000269|PubMed:12429849}. Note=Mainly found in the nucleoplasm, with low levels detected in the cytoplasmic and chromatin fractions. {ECO:0000250}.	Nucleus
Q8IZL8	PELP1_HUMAN	reviewed	Proline-, glutamic acid- and leucine-rich protein 1 (Modulator of non-genomic activity of estrogen receptor) (Transcription factor HMX3)	PELP1 HMX3 MNAR	Homo sapiens (Human)	1130	SUBCELLULAR LOCATION: Nucleus, nucleoplasm {ECO:0000250}. Nucleus. Cytoplasm. Note=Mainly found in the nucleoplasm, with low levels detected in the cytoplasm (By similarity). Also found associated with the plasma membrane. Mainly in cytoplasm in a subset of breast tumors. Localization is widely deregulated in endometrial cancers with predominantly cytoplasm localization in high-grade endometrial …	Nucleus
Q15020	SART3_HUMAN	reviewed	Squamous cell carcinoma antigen recognized by T-cells 3 (SART-3) (Tat-interacting protein of 110 kDa) (Tip110) (p110 nuclear RNA-binding protein)	SART3 KIAA0156 TIP110	Homo sapiens (Human)	963	SUBCELLULAR LOCATION: Nucleus, nucleoplasm {ECO:0000269|PubMed:10463607, ECO:0000269|PubMed:11959860, ECO:0000269|PubMed:12578909}. Nucleus, Cajal body {ECO:0000269|PubMed:12578909}. Nucleus speckle {ECO:0000269|PubMed:11959860}. Cytoplasm {ECO:0000269|PubMed:10463607, ECO:0000269|PubMed:11959860}.	Nucleus
Q8TEQ6	GEMI5_HUMAN	reviewed	Gem-associated protein 5 (Gemin5)	GEMIN5	Homo sapiens (Human)	1508	SUBCELLULAR LOCATION: Nucleus, nucleoplasm {ECO:0000269|PubMed:11714716}. Nucleus, gem {ECO:0000269|PubMed:11714716}. Cytoplasm {ECO:0000269|PubMed:11714716, ECO:0000269|PubMed:19750007, ECO:0000269|PubMed:20513430, ECO:0000269|PubMed:25911097, ECO:0000269|PubMed:27507887}. Note=Found both in the nucleoplasm and in nuclear bodies called gems (Gemini of Cajal bodies) that are often in proximity to…	Nucleus
O43251	RFOX2_HUMAN	reviewed	RNA binding protein fox-1 homolog 2 (Fox-1 homolog B) (Hexaribonucleotide-binding protein 2) (RNA-binding motif protein 9) (RNA-binding protein 9) (Repressor of tamoxifen transcriptional activity)	RBFOX2 FOX2 HRNBP2 RBM9 RTA	Homo sapiens (Human)	390	SUBCELLULAR LOCATION: Nucleus. Cytoplasm {ECO:0000250}.	Nucleus
Q96T76	MMS19_HUMAN	reviewed	MMS19 nucleotide excision repair protein homolog (hMMS19) (MET18 homolog) (MMS19-like protein)	MMS19 MMS19L	Homo sapiens (Human)	1030	SUBCELLULAR LOCATION: Nucleus. Cytoplasm, cytoskeleton, spindle.	Nucleus
Q02241	KIF23_HUMAN	reviewed	Kinesin-like protein KIF23 (Kinesin-like protein 5) (Mitotic kinesin-like protein 1)	KIF23 KNSL5 MKLP1	Homo sapiens (Human)	960	SUBCELLULAR LOCATION: Nucleus. Cytoplasm, cytoskeleton, spindle. Midbody, Midbody ring {ECO:0000269|PubMed:16213214}. Note=Localizes to the interzone of mitotic spindles. Detected at the midbody during later stages of mitotic cytokinesis.	Nucleus
Q9UIV1	CNOT7_HUMAN	reviewed	CCR4-NOT transcription complex subunit 7 (EC 3.1.13.4) (BTG1-binding factor 1) (CCR4-associated factor 1) (CAF-1) (Caf1a)	CNOT7 CAF1	Homo sapiens (Human)	285	SUBCELLULAR LOCATION: Nucleus. Cytoplasm, P-body {ECO:0000250}. Note=NANOS2 promotes its localization to P-body. {ECO:0000250}.	Nucleus
P31941	ABC3A_HUMAN	reviewed	DNA dC->dU-editing enzyme APOBEC-3A (A3A) (EC 3.5.4.-) (Phorbolin-1)	APOBEC3A	Homo sapiens (Human)	199	SUBCELLULAR LOCATION: Nucleus. Cytoplasm.	Nucleus
Q92499	DDX1_HUMAN	reviewed	ATP-dependent RNA helicase DDX1 (EC 3.6.4.13) (DEAD box protein 1) (DEAD box protein retinoblastoma) (DBP-RB)	DDX1	Homo sapiens (Human)	740	SUBCELLULAR LOCATION: Nucleus. Cytoplasm. Cytoplasmic granule. Note=Localized with MBNL1, TIAL1 and YBX1 in stress granules upon stress. Localized with CSTF2 in cleavage bodies. Forms large aggregates called DDX1 bodies. Relocalized into multiple foci (IR-induced foci or IRIF) after IR treatment, a process that depends on the presence of chromosomal DNA and/or RNA-DNA duplexes. Relocalized at sit…	Nucleus
P39687	AN32A_HUMAN	reviewed	Acidic leucine-rich nuclear phosphoprotein 32 family member A (Acidic nuclear phosphoprotein pp32) (pp32) (Leucine-rich acidic nuclear protein) (LANP) (Mapmodulin) (Potent heat-stable protein phosphatase 2A inhibitor I1PP2A) (Putative HLA-DR-associated protein I) (PHAPI)	ANP32A C15orf1 LANP MAPM PHAP1	Homo sapiens (Human)	249	SUBCELLULAR LOCATION: Nucleus. Cytoplasm. Endoplasmic reticulum. Note=Translocates to the cytoplasm during the process of neuritogenesis (By similarity). Shuttles between nucleus and cytoplasm. {ECO:0000250}.	Nucleus
P06493	CDK1_HUMAN	reviewed	Cyclin-dependent kinase 1 (CDK1) (EC 2.7.11.22) (EC 2.7.11.23) (Cell division control protein 2 homolog) (Cell division protein kinase 1) (p34 protein kinase)	CDK1 CDC2 CDC28A CDKN1 P34CDC2	Homo sapiens (Human)	297	SUBCELLULAR LOCATION: Nucleus. Cytoplasm. Mitochondrion. Cytoplasm, cytoskeleton, microtubule organizing center, centrosome. Cytoplasm, cytoskeleton, spindle. Note=Cytoplasmic during the interphase. Colocalizes with SIRT2 on centrosome during prophase and on splindle fibers during metaphase of the mitotic cell cycle. Reversibly translocated from cytoplasm to nucleus when phosphorylated before G2-…	Nucleus
Q86TG7	PEG10_HUMAN	reviewed	Retrotransposon-derived protein PEG10 (Embryonal carcinoma differentiation-regulated protein) (Mammalian retrotransposon-derived protein 2) (Myelin expression factor 3-like protein 1) (MEF3-like protein 1) (Paternally expressed gene 10 protein) (Retrotransposon gag domain-containing protein 3) (Retrotransposon-derived gag-like polyprotein) (Ty3/Gypsy-like protein)	PEG10 EDR KIAA1051 MAR2 MART2 MEF3L1 RGAG3	Homo sapiens (Human)	708	SUBCELLULAR LOCATION: Nucleus. Cytoplasm. Note=Detected predominantly in the cytoplasm of breast and prostate carcinomas, in hepatocellular carcinoma (HCC) and B-cell chronic lymphocytic leukemia (B-CLL) cells and in the Hep-G2 cell line. Colocalized with ALK1.	Nucleus
O00425	IF2B3_HUMAN	reviewed	Insulin-like growth factor 2 mRNA-binding protein 3 (IGF2 mRNA-binding protein 3) (IMP-3) (IGF-II mRNA-binding protein 3) (KH domain-containing protein overexpressed in cancer) (hKOC) (VICKZ family member 3)	IGF2BP3 IMP3 KOC1 VICKZ3	Homo sapiens (Human)	579	SUBCELLULAR LOCATION: Nucleus. Cytoplasm. Note=Found in lamellipodia of the leading edge, in the perinuclear region, and beneath the plasma membrane. The subcytoplasmic localization is cell specific and regulated by cell contact and growth. Localized at the connecting piece and the tail of the spermatozoa. Colocalized with CD44 mRNA in RNP granules. In response to cellular stress, such as oxidati…	Nucleus
Q9Y6M1	IF2B2_HUMAN	reviewed	Insulin-like growth factor 2 mRNA-binding protein 2 (IGF2 mRNA-binding protein 2) (IMP-2) (Hepatocellular carcinoma autoantigen p62) (IGF-II mRNA-binding protein 2) (VICKZ family member 2)	IGF2BP2 IMP2 VICKZ2	Homo sapiens (Human)	599	SUBCELLULAR LOCATION: Nucleus. Cytoplasm. Note=Localized in cytoplasmic mRNP granules containing untranslated mRNAs. Localizes at the connecting piece and the tail of the spermatozoa. In response to cellular stress, such as oxidative stress, recruited to stress granules.	Nucleus
Q9NW64	RBM22_HUMAN	reviewed	Pre-mRNA-splicing factor RBM22 (RNA-binding motif protein 22) (Zinc finger CCCH domain-containing protein 16)	RBM22 ZC3H16 199G4	Homo sapiens (Human)	420	SUBCELLULAR LOCATION: Nucleus. Cytoplasm. Note=Mainly located in the nucleus. Translocated from the nucleus to the cytoplasm after heat shock cell treatment. May be shuttling between the nucleus and the cytosol.	Nucleus
Q86X55	CARM1_HUMAN	reviewed	Histone-arginine methyltransferase CARM1 (EC 2.1.1.319) (Coactivator-associated arginine methyltransferase 1) (Protein arginine N-methyltransferase 4)	CARM1 PRMT4	Homo sapiens (Human)	608	SUBCELLULAR LOCATION: Nucleus. Cytoplasm. Note=Mainly nuclear during the G1, S and G2 phases of the cell cycle. Cytoplasmic during mitosis, after breakup of the nuclear membrane.	Nucleus
O43592	XPOT_HUMAN	reviewed	Exportin-T (Exportin(tRNA)) (tRNA exportin)	XPOT	Homo sapiens (Human)	962	SUBCELLULAR LOCATION: Nucleus. Cytoplasm. Note=Nuclear, once bound to tRNA and Ran the complex translocates to the cytoplasm. Shuttles between the nucleus and the cytoplasm.	Nucleus
Q96QU8	XPO6_HUMAN	reviewed	Exportin-6 (Exp6) (Ran-binding protein 20)	XPO6 KIAA0370 RANBP20	Homo sapiens (Human)	1125	SUBCELLULAR LOCATION: Nucleus. Cytoplasm. Note=Shuttles between the nucleus and the cytoplasm.	Nucleus
P54727	RD23B_HUMAN	reviewed	UV excision repair protein RAD23 homolog B (HR23B) (hHR23B) (XP-C repair-complementing complex 58 kDa protein) (p58)	RAD23B	Homo sapiens (Human)	409	SUBCELLULAR LOCATION: Nucleus. Cytoplasm. Note=The intracellular distribution is cell cycle dependent. Localized to the nucleus and the cytoplasm during G1 phase. Nuclear levels decrease during S-phase; upon entering mitosis, relocalizes in the cytoplasm without association with chromatin.	Nucleus
Q9BWF3	RBM4_HUMAN	reviewed	RNA-binding protein 4 (Lark homolog) (hLark) (RNA-binding motif protein 4) (RNA-binding motif protein 4a)	RBM4 RBM4A	Homo sapiens (Human)	364	SUBCELLULAR LOCATION: Nucleus. Nucleus, nucleolus. Nucleus speckle. Cytoplasm. Cytoplasmic granule. Note=Undergoes continuous nucleocytoplasmic shuttling. Upon nuclear import colocalizes with SR proteins in nuclear speckles. Arsenite stress-induced phosphorylation increases its subcellular relocalization from the nucleus to the cytoplasm and to cytoplasmic stress granules (SG) via a p38 MAPK sign…	Nucleus
P27695	APEX1_HUMAN	reviewed	DNA-(apurinic or apyrimidinic site) lyase (EC 3.1.-.-) (EC 4.2.99.18) (APEX nuclease) (APEN) (Apurinic-apyrimidinic endonuclease 1) (AP endonuclease 1) (APE-1) (REF-1) (Redox factor-1) [Cleaved into: DNA-(apurinic or apyrimidinic site) lyase, mitochondrial]	APEX1 APE APE1 APEX APX HAP1 REF1	Homo sapiens (Human)	318	SUBCELLULAR LOCATION: Nucleus. Nucleus, nucleolus. Nucleus speckle. Endoplasmic reticulum. Cytoplasm. Note=Detected in the cytoplasm of B-cells stimulated to switch (By similarity). Colocalized with SIRT1 in the nucleus. Colocalized with YBX1 in nuclear speckles after genotoxic stress. Together with OGG1 is recruited to nuclear speckles in UVA-irradiated cells. Colocalized with nucleolin and NPM1…	Nucleus
B3KW56	B3KW56_HUMAN	unreviewed	Eukaryotic translation initiation factor 3 subunit E (eIF3e) (Eukaryotic translation initiation factor 3 subunit 6) (eIF-3 p48)	EIF3S6 EIF3E INT6 hCG_2008794	Homo sapiens (Human)	396		Cytoplasm
F8VQZ7	F8VQZ7_HUMAN	unreviewed	Methionine aminopeptidase 2 (MAP 2) (MetAP 2) (EC 3.4.11.18) (Initiation factor 2-associated 67 kDa glycoprotein) (Peptidase M) (p67) (p67eIF2)	METAP2	Homo sapiens (Human)	477		Cytoplasm
F8VRR3	F8VRR3_HUMAN	unreviewed	Methionine aminopeptidase 2 (MAP 2) (MetAP 2) (EC 3.4.11.18) (Initiation factor 2-associated 67 kDa glycoprotein) (Peptidase M) (p67) (p67eIF2)	METAP2	Homo sapiens (Human)	442		Cytoplasm
G3V4X5	G3V4X5_HUMAN	unreviewed	Proteasome endopeptidase complex (EC 3.4.25.1)	PSMA3	Homo sapiens (Human)	180		Cytoplasm
H0Y390	H0Y390_HUMAN	unreviewed	Microtubule-actin cross-linking factor 1, isoforms 1/2/3/5 (Fragment)	MACF1	Homo sapiens (Human)	4434		Cytoplasm
H0YKS0	H0YKS0_HUMAN	unreviewed	Proteasome endopeptidase complex (EC 3.4.25.1) (Fragment)	PSMA4	Homo sapiens (Human)	122		Cytoplasm
H3BPE1	H3BPE1_HUMAN	unreviewed	Microtubule-actin cross-linking factor 1, isoforms 1/2/3/5	MACF1	Homo sapiens (Human)	7555		Cytoplasm
H3BQK9	H3BQK9_HUMAN	unreviewed	Microtubule-actin cross-linking factor 1, isoforms 1/2/3/5	MACF1	Homo sapiens (Human)	7592		Cytoplasm
P20700	LMNB1_HUMAN	reviewed	Lamin-B1	LMNB1 LMN2 LMNB	Homo sapiens (Human)	586	SUBCELLULAR LOCATION: Nucleus inner membrane; Lipid-anchor; Nucleoplasmic side.	Cytoskeleton
B4DZT3	B4DZT3_HUMAN	unreviewed	cDNA FLJ50934, highly similar to Lamin-B1		Homo sapiens (Human)	376		Cytoskeleton
E9PBF6	E9PBF6_HUMAN	unreviewed	Lamin-B1	LMNB1	Homo sapiens (Human)	387		Cytoskeleton
A0A140VKF1	A0A140VKF1_HUMAN	unreviewed	Kinesin-like protein		Homo sapiens (Human)	725		Cytoskeleton
A1L196	A1L196_HUMAN	unreviewed	Tubulin beta chain (Fragment)		Homo sapiens (Human)	151		Cytoskeleton
A8K048	A8K048_HUMAN	unreviewed	Kinesin-like protein (Fragment)		Homo sapiens (Human)	881		Cytoskeleton
A8K3S3	A8K3S3_HUMAN	unreviewed	Kinesin-like protein		Homo sapiens (Human)	725		Cytoskeleton
B4DM33	B4DM33_HUMAN	unreviewed	cDNA FLJ52068, highly similar to Microtubule-associated protein RP/EB family member 1		Homo sapiens (Human)	238		Cytoskeleton
B7Z6Q6	B7Z6Q6_HUMAN	unreviewed	Kinesin-like protein		Homo sapiens (Human)	684		Cytoskeleton
B7Z7M6	B7Z7M6_HUMAN	unreviewed	Kinesin-like protein		Homo sapiens (Human)	612		Cytoskeleton
D3DRX6	D3DRX6_HUMAN	unreviewed	Kinesin-like protein	KIF5B hCG_37538	Homo sapiens (Human)	963		Cytoskeleton
H7BYN4	H7BYN4_HUMAN	unreviewed	Kinesin-like protein	KIF23	Homo sapiens (Human)	952		Cytoskeleton
K7ES63	K7ES63_HUMAN	unreviewed	Tubulin beta chain (Fragment)	TUBB6	Homo sapiens (Human)	116		Cytoskeleton
Q8N5N1	Q8N5N1_HUMAN	unreviewed	Kinesin-like protein (Fragment)		Homo sapiens (Human)	468		Cytoskeleton
V9HW29	V9HW29_HUMAN	unreviewed	Kinesin-like protein	HEL-S-61	Homo sapiens (Human)	963		Cytoskeleton
Q9H488	OFUT1_HUMAN	reviewed	GDP-fucose protein O-fucosyltransferase 1 (EC 2.4.1.221) (Peptide-O-fucosyltransferase 1) (O-FucT-1)	POFUT1 FUT12 KIAA0180	Homo sapiens (Human)	388	SUBCELLULAR LOCATION: Endoplasmic reticulum {ECO:0000250|UniProtKB:Q6EV70}.	Endoplasmic reticulum
Q9BTV4	TMM43_HUMAN	reviewed	Transmembrane protein 43 (Protein LUMA)	TMEM43 UNQ2564/PRO6244	Homo sapiens (Human)	400	SUBCELLULAR LOCATION: Endoplasmic reticulum {ECO:0000250}. Nucleus inner membrane; Multi-pass membrane protein. Note=Retained in the inner nuclear membrane through interaction with EMD and A- and B-lamins. The N- and C-termini are oriented towards the nucleoplasm. The majority of the hydrophilic domain resides in the endoplasmic reticulum lumen (By similarity). {ECO:0000250}.	Endoplasmic reticulum
B4DHR1	B4DHR1_HUMAN	unreviewed	cDNA FLJ53009, highly similar to Calreticulin		Homo sapiens (Human)	212	SUBCELLULAR LOCATION: Endoplasmic reticulum {ECO:0000256|SAAS:SAAS00583789}.	Endoplasmic reticulum
D6RAQ8	D6RAQ8_HUMAN	unreviewed	Calnexin (Fragment)	CANX	Homo sapiens (Human)	107	SUBCELLULAR LOCATION: Endoplasmic reticulum {ECO:0000256|SAAS:SAAS00583789}.	Endoplasmic reticulum
D6RAU8	D6RAU8_HUMAN	unreviewed	Calnexin (Fragment)	CANX	Homo sapiens (Human)	134	SUBCELLULAR LOCATION: Endoplasmic reticulum {ECO:0000256|SAAS:SAAS00583789}.	Endoplasmic reticulum
D6RB85	D6RB85_HUMAN	unreviewed	Calnexin (Fragment)	CANX	Homo sapiens (Human)	144	SUBCELLULAR LOCATION: Endoplasmic reticulum {ECO:0000256|SAAS:SAAS00583789}.	Endoplasmic reticulum
D6RDP7	D6RDP7_HUMAN	unreviewed	Calnexin (Fragment)	CANX	Homo sapiens (Human)	168	SUBCELLULAR LOCATION: Endoplasmic reticulum {ECO:0000256|SAAS:SAAS00583789}.	Endoplasmic reticulum
K7EJB9	K7EJB9_HUMAN	unreviewed	Calreticulin (Fragment)	CALR	Homo sapiens (Human)	247	SUBCELLULAR LOCATION: Endoplasmic reticulum {ECO:0000256|SAAS:SAAS00583789}.	Endoplasmic reticulum
Q16094	Q16094_HUMAN	unreviewed	Calnexin (Fragment)		Homo sapiens (Human)	272	SUBCELLULAR LOCATION: Endoplasmic reticulum {ECO:0000256|SAAS:SAAS00583789}.	Endoplasmic reticulum
Q8TCJ2	STT3B_HUMAN	reviewed	Dolichyl-diphosphooligosaccharide--protein glycosyltransferase subunit STT3B (Oligosaccharyl transferase subunit STT3B) (STT3-B) (EC 2.4.99.18) (Source of immunodominant MHC-associated peptides homolog)	STT3B SIMP	Homo sapiens (Human)	826	SUBCELLULAR LOCATION: Endoplasmic reticulum {ECO:0000269|PubMed:12887896}. Endoplasmic reticulum membrane; Multi-pass membrane protein {ECO:0000305}.	Endoplasmic reticulum
Q92734	TFG_HUMAN	reviewed	Protein TFG (TRK-fused gene protein)	TFG	Homo sapiens (Human)	400	SUBCELLULAR LOCATION: Endoplasmic reticulum {ECO:0000269|PubMed:27813252}. Note=Localizes to endoplasmic reticulum exit site (ERES) (PubMed:27813252). {ECO:0000269|PubMed:27813252}.	Endoplasmic reticulum
Q9NYU1	UGGG2_HUMAN	reviewed	UDP-glucose:glycoprotein glucosyltransferase 2 (UGT2) (hUGT2) (EC 2.4.1.-) (UDP--Glc:glycoprotein glucosyltransferase 2) (UDP-glucose ceramide glucosyltransferase-like 1)	UGGT2 UGCGL2 UGT2	Homo sapiens (Human)	1516	SUBCELLULAR LOCATION: Endoplasmic reticulum lumen {ECO:0000255|PROSITE-ProRule:PRU10138, ECO:0000269|PubMed:12913004}. Endoplasmic reticulum-Golgi intermediate compartment {ECO:0000255|PROSITE-ProRule:PRU10138, ECO:0000269|PubMed:12913004}.	Endoplasmic reticulum
P13674	P4HA1_HUMAN	reviewed	Prolyl 4-hydroxylase subunit alpha-1 (4-PH alpha-1) (EC 1.14.11.2) (Procollagen-proline,2-oxoglutarate-4-dioxygenase subunit alpha-1)	P4HA1 P4HA	Homo sapiens (Human)	534	SUBCELLULAR LOCATION: Endoplasmic reticulum lumen.	Endoplasmic reticulum
Q9Y4L1	HYOU1_HUMAN	reviewed	Hypoxia up-regulated protein 1 (150 kDa oxygen-regulated protein) (ORP-150) (170 kDa glucose-regulated protein) (GRP-170)	HYOU1 GRP170 ORP150	Homo sapiens (Human)	999	SUBCELLULAR LOCATION: Endoplasmic reticulum lumen.	Endoplasmic reticulum
O14656	TOR1A_HUMAN	reviewed	Torsin-1A (Dystonia 1 protein) (Torsin ATPase-1A) (EC 3.6.4.-) (Torsin family 1 member A)	TOR1A DQ2 DYT1 TA TORA	Homo sapiens (Human)	332	SUBCELLULAR LOCATION: Endoplasmic reticulum lumen. Nucleus membrane; Peripheral membrane protein. Cell projection, growth cone {ECO:0000250}. Cytoplasmic vesicle membrane {ECO:0000250}. Cytoplasmic vesicle, secretory vesicle {ECO:0000250}. Cytoplasmic vesicle, secretory vesicle, synaptic vesicle. Cytoplasm, cytoskeleton. Note=Upon oxidative stress, redistributes to protusions from the cell surfac…	Endoplasmic reticulum
P51648	AL3A2_HUMAN	reviewed	Fatty aldehyde dehydrogenase (EC 1.2.1.3) (Aldehyde dehydrogenase 10) (Aldehyde dehydrogenase family 3 member A2) (Microsomal aldehyde dehydrogenase)	ALDH3A2 ALDH10 FALDH	Homo sapiens (Human)	485	SUBCELLULAR LOCATION: Endoplasmic reticulum membrane {ECO:0000250|UniProtKB:P30839}; Single-pass membrane protein {ECO:0000255}; Cytoplasmic side {ECO:0000250|UniProtKB:P30839}.	Endoplasmic reticulum
Q16850	CP51A_HUMAN	reviewed	Lanosterol 14-alpha demethylase (LDM) (EC 1.14.13.70) (CYPLI) (Cytochrome P450 51A1) (Cytochrome P450-14DM) (Cytochrome P45014DM) (Cytochrome P450LI) (Sterol 14-alpha demethylase)	CYP51A1 CYP51	Homo sapiens (Human)	503	SUBCELLULAR LOCATION: Endoplasmic reticulum membrane {ECO:0000250|UniProtKB:Q64654}; Single-pass membrane protein {ECO:0000255}. Microsome membrane {ECO:0000250|UniProtKB:Q64654}; Single-pass membrane protein {ECO:0000255}.	Endoplasmic reticulum
P48651	PTSS1_HUMAN	reviewed	Phosphatidylserine synthase 1 (PSS-1) (PtdSer synthase 1) (EC 2.7.8.29) (Serine-exchange enzyme I)	PTDSS1 KIAA0024 PSSA	Homo sapiens (Human)	473	SUBCELLULAR LOCATION: Endoplasmic reticulum membrane {ECO:0000250}; Multi-pass membrane protein {ECO:0000250}. Note=Highly enriched in the mitochondria-associated membrane (MAM). {ECO:0000250}.	Endoplasmic reticulum
Q9BW60	ELOV1_HUMAN	reviewed	Elongation of very long chain fatty acids protein 1 (EC 2.3.1.199) (3-keto acyl-CoA synthase ELOVL1) (ELOVL fatty acid elongase 1) (ELOVL FA elongase 1) (Very long chain 3-ketoacyl-CoA synthase 1) (Very long chain 3-oxoacyl-CoA synthase 1)	ELOVL1 SSC1 CGI-88	Homo sapiens (Human)	279	SUBCELLULAR LOCATION: Endoplasmic reticulum membrane {ECO:0000255|HAMAP-Rule:MF_03201, ECO:0000269|PubMed:20937905}; Multi-pass membrane protein {ECO:0000255|HAMAP-Rule:MF_03201}.	Endoplasmic reticulum
Q9NYP7	ELOV5_HUMAN	reviewed	Elongation of very long chain fatty acids protein 5 (EC 2.3.1.199) (3-keto acyl-CoA synthase ELOVL5) (ELOVL fatty acid elongase 5) (ELOVL FA elongase 5) (Fatty acid elongase 1) (hELO1) (Very long chain 3-ketoacyl-CoA synthase 5) (Very long chain 3-oxoacyl-CoA synthase 5)	ELOVL5 ELOVL2 PRO0530	Homo sapiens (Human)	299	SUBCELLULAR LOCATION: Endoplasmic reticulum membrane {ECO:0000255|HAMAP-Rule:MF_03205, ECO:0000269|PubMed:20937905}; Multi-pass membrane protein {ECO:0000255|HAMAP-Rule:MF_03205}. Cell projection, dendrite {ECO:0000255|HAMAP-Rule:MF_03205, ECO:0000269|PubMed:25065913}. Note=In Purkinje cells, the protein localizes to the soma and proximal portion of the dendritic tree. {ECO:0000255|HAMAP-Rule:MF_…	Endoplasmic reticulum
P16435	NCPR_HUMAN	reviewed	NADPH--cytochrome P450 reductase (CPR) (P450R) (EC 1.6.2.4)	POR CYPOR	Homo sapiens (Human)	677	SUBCELLULAR LOCATION: Endoplasmic reticulum membrane {ECO:0000255|HAMAP-Rule:MF_03212}; Single-pass membrane protein {ECO:0000255|HAMAP-Rule:MF_03212}; Cytoplasmic side {ECO:0000255|HAMAP-Rule:MF_03212}.	Endoplasmic reticulum
B3KWH9	B3KWH9_HUMAN	unreviewed	Elongation of very long chain fatty acids protein 5 (EC 2.3.1.199) (3-keto acyl-CoA synthase ELOVL5) (ELOVL fatty acid elongase 5) (ELOVL FA elongase 5) (Very long chain 3-ketoacyl-CoA synthase 5) (Very long chain 3-oxoacyl-CoA synthase 5)	ELOVL5	Homo sapiens (Human)	299	SUBCELLULAR LOCATION: Endoplasmic reticulum membrane {ECO:0000256|HAMAP-Rule:MF_03205}; Multi-pass membrane protein {ECO:0000256|HAMAP-Rule:MF_03205}. Cell projection, dendrite {ECO:0000256|HAMAP-Rule:MF_03205}. Note=In Purkinje cells, the protein localizes to the soma and proximal portion of the dendritic tree. {ECO:0000256|HAMAP-Rule:MF_03205}.	Endoplasmic reticulum
B7ZAT6	B7ZAT6_HUMAN	unreviewed	O-acyltransferase		Homo sapiens (Human)	485	SUBCELLULAR LOCATION: Endoplasmic reticulum membrane {ECO:0000256|PIRNR:PIRNR000439}; Multi-pass membrane protein {ECO:0000256|PIRNR:PIRNR000439}.	Endoplasmic reticulum
A0A024QZT7	A0A024QZT7_HUMAN	unreviewed	ER lumen protein-retaining receptor	KDELR2 hCG_15972	Homo sapiens (Human)	212	SUBCELLULAR LOCATION: Endoplasmic reticulum membrane {ECO:0000256|RuleBase:RU000634}; Multi-pass membrane protein {ECO:0000256|RuleBase:RU000634}.	Endoplasmic reticulum
A0A0B4J239	A0A0B4J239_HUMAN	unreviewed	Dolichyl-diphosphooligosaccharide--protein glycosyltransferase subunit DAD1 (Oligosaccharyl transferase subunit DAD1)	DAD1	Homo sapiens (Human)	78	SUBCELLULAR LOCATION: Endoplasmic reticulum membrane {ECO:0000256|RuleBase:RU361136}; Multi-pass membrane protein {ECO:0000256|RuleBase:RU361136}.	Endoplasmic reticulum
F5GXX5	F5GXX5_HUMAN	unreviewed	Dolichyl-diphosphooligosaccharide--protein glycosyltransferase subunit DAD1 (Oligosaccharyl transferase subunit DAD1)	DAD1	Homo sapiens (Human)	85	SUBCELLULAR LOCATION: Endoplasmic reticulum membrane {ECO:0000256|RuleBase:RU361136}; Multi-pass membrane protein {ECO:0000256|RuleBase:RU361136}.	Endoplasmic reticulum
Q53G02	Q53G02_HUMAN	unreviewed	Dolichyl-diphosphooligosaccharide--protein glycosyltransferase subunit DAD1 (Oligosaccharyl transferase subunit DAD1) (Fragment)		Homo sapiens (Human)	113	SUBCELLULAR LOCATION: Endoplasmic reticulum membrane {ECO:0000256|RuleBase:RU361136}; Multi-pass membrane protein {ECO:0000256|RuleBase:RU361136}.	Endoplasmic reticulum
F8WF32	F8WF32_HUMAN	unreviewed	Dolichyl-diphosphooligosaccharide--protein glycosyltransferase subunit 1	RPN1	Homo sapiens (Human)	121	SUBCELLULAR LOCATION: Endoplasmic reticulum membrane {ECO:0000256|RuleBase:RU361143}; Single-pass type I membrane protein {ECO:0000256|RuleBase:RU361143}.	Endoplasmic reticulum
H7C4I6	H7C4I6_HUMAN	unreviewed	Mannosyltransferase (EC 2.4.1.-) (Fragment)	ALG12	Homo sapiens (Human)	196	SUBCELLULAR LOCATION: Endoplasmic reticulum membrane {ECO:0000256|RuleBase:RU363075}; Multi-pass membrane protein {ECO:0000256|RuleBase:RU363075}.	Endoplasmic reticulum
H7C5R7	H7C5R7_HUMAN	unreviewed	Mannosyltransferase (EC 2.4.1.-) (Fragment)	ALG12	Homo sapiens (Human)	205	SUBCELLULAR LOCATION: Endoplasmic reticulum membrane {ECO:0000256|RuleBase:RU363075}; Multi-pass membrane protein {ECO:0000256|RuleBase:RU363075}.	Endoplasmic reticulum
H3BMZ1	H3BMZ1_HUMAN	unreviewed	Very-long-chain (3R)-3-hydroxyacyl-CoA dehydratase (EC 4.2.1.134) (Fragment)	HACD3	Homo sapiens (Human)	139	SUBCELLULAR LOCATION: Endoplasmic reticulum membrane {ECO:0000256|RuleBase:RU363109}; Multi-pass membrane protein {ECO:0000256|RuleBase:RU363109}.	Endoplasmic reticulum
H3BPZ1	H3BPZ1_HUMAN	unreviewed	Very-long-chain (3R)-3-hydroxyacyl-CoA dehydratase (EC 4.2.1.134)	HACD3	Homo sapiens (Human)	337	SUBCELLULAR LOCATION: Endoplasmic reticulum membrane {ECO:0000256|RuleBase:RU363109}; Multi-pass membrane protein {ECO:0000256|RuleBase:RU363109}.	Endoplasmic reticulum
H3BRL8	H3BRL8_HUMAN	unreviewed	Very-long-chain (3R)-3-hydroxyacyl-CoA dehydratase (EC 4.2.1.134)	HACD3	Homo sapiens (Human)	245	SUBCELLULAR LOCATION: Endoplasmic reticulum membrane {ECO:0000256|RuleBase:RU363109}; Multi-pass membrane protein {ECO:0000256|RuleBase:RU363109}.	Endoplasmic reticulum
H3BS72	H3BS72_HUMAN	unreviewed	Very-long-chain (3R)-3-hydroxyacyl-CoA dehydratase (EC 4.2.1.134)	HACD3	Homo sapiens (Human)	400	SUBCELLULAR LOCATION: Endoplasmic reticulum membrane {ECO:0000256|RuleBase:RU363109}; Multi-pass membrane protein {ECO:0000256|RuleBase:RU363109}.	Endoplasmic reticulum
Q9UM00	TMCO1_HUMAN	reviewed	Calcium load-activated calcium channel (CLAC channel) (Transmembrane and coiled-coil domain-containing protein 1) (Transmembrane and coiled-coil domains protein 4) (Xenogeneic cross-immune protein PCIA3)	TMCO1 TMCC4 PNAS-10 PNAS-136 UNQ151/PRO177	Homo sapiens (Human)	188	SUBCELLULAR LOCATION: Endoplasmic reticulum membrane {ECO:0000269|PubMed:10393320, ECO:0000269|PubMed:27212239}; Multi-pass membrane protein {ECO:0000269|PubMed:10393320, ECO:0000269|PubMed:27212239}. Golgi apparatus membrane {ECO:0000269|PubMed:10393320}; Multi-pass membrane protein {ECO:0000269|PubMed:10393320}. Note=The first transmembrane region is required for localization to the endoplasmic…	Endoplasmic reticulum
Q15011	HERP1_HUMAN	reviewed	Homocysteine-responsive endoplasmic reticulum-resident ubiquitin-like domain member 1 protein (Methyl methanesulfonate (MMF)-inducible fragment protein 1)	HERPUD1 HERP KIAA0025 MIF1	Homo sapiens (Human)	391	SUBCELLULAR LOCATION: Endoplasmic reticulum membrane {ECO:0000269|PubMed:10922362}; Multi-pass membrane protein {ECO:0000269|PubMed:10922362}.	Endoplasmic reticulum
Q96S52	PIGS_HUMAN	reviewed	GPI transamidase component PIG-S (Phosphatidylinositol-glycan biosynthesis class S protein)	PIGS UNQ1873/PRO4316	Homo sapiens (Human)	555	SUBCELLULAR LOCATION: Endoplasmic reticulum membrane {ECO:0000269|PubMed:11483512}; Multi-pass membrane protein {ECO:0000269|PubMed:11483512}.	Endoplasmic reticulum
Q969N2	PIGT_HUMAN	reviewed	GPI transamidase component PIG-T (Phosphatidylinositol-glycan biosynthesis class T protein)	PIGT CGI-06 PSEC0163 UNQ716/PRO1379	Homo sapiens (Human)	578	SUBCELLULAR LOCATION: Endoplasmic reticulum membrane {ECO:0000269|PubMed:11483512}; Single-pass type I membrane protein {ECO:0000269|PubMed:11483512}.	Endoplasmic reticulum
Q9UKV5	AMFR_HUMAN	reviewed	E3 ubiquitin-protein ligase AMFR (EC 2.3.2.27) (Autocrine motility factor receptor) (AMF receptor) (RING finger protein 45) (RING-type E3 ubiquitin transferase AMFR) (gp78)	AMFR RNF45	Homo sapiens (Human)	643	SUBCELLULAR LOCATION: Endoplasmic reticulum membrane {ECO:0000269|PubMed:11724934}; Multi-pass membrane protein {ECO:0000269|PubMed:11724934}.	Endoplasmic reticulum
Q53GQ0	DHB12_HUMAN	reviewed	Very-long-chain 3-oxoacyl-CoA reductase (EC 1.1.1.330) (17-beta-hydroxysteroid dehydrogenase 12) (17-beta-HSD 12) (3-ketoacyl-CoA reductase) (KAR) (Estradiol 17-beta-dehydrogenase 12) (EC 1.1.1.62) (Short chain dehydrogenase/reductase family 12C member 1)	HSD17B12 SDR12C1	Homo sapiens (Human)	312	SUBCELLULAR LOCATION: Endoplasmic reticulum membrane {ECO:0000269|PubMed:12482854}; Multi-pass membrane protein {ECO:0000269|PubMed:12482854}.	Endoplasmic reticulum
Q9NZ01	TECR_HUMAN	reviewed	Very-long-chain enoyl-CoA reductase (EC 1.3.1.93) (Synaptic glycoprotein SC2) (Trans-2,3-enoyl-CoA reductase) (TER)	TECR GPSN2 SC2	Homo sapiens (Human)	308	SUBCELLULAR LOCATION: Endoplasmic reticulum membrane {ECO:0000269|PubMed:12482854}; Multi-pass membrane protein {ECO:0000269|PubMed:12482854}.	Endoplasmic reticulum
Q8WXF7	ATLA1_HUMAN	reviewed	Atlastin-1 (EC 3.6.5.-) (Brain-specific GTP-binding protein) (GTP-binding protein 3) (GBP-3) (hGBP3) (Guanine nucleotide-binding protein 3) (Spastic paraplegia 3 protein A)	ATL1 GBP3 SPG3A	Homo sapiens (Human)	558	SUBCELLULAR LOCATION: Endoplasmic reticulum membrane {ECO:0000269|PubMed:14506257, ECO:0000269|PubMed:16339213, ECO:0000269|PubMed:17321752, ECO:0000269|PubMed:19665976}; Multi-pass membrane protein {ECO:0000269|PubMed:14506257, ECO:0000269|PubMed:16339213, ECO:0000269|PubMed:17321752, ECO:0000269|PubMed:19665976}. Golgi apparatus membrane {ECO:0000269|PubMed:14506257, ECO:0000269|PubMed:17321752…	Endoplasmic reticulum
P42345	MTOR_HUMAN	reviewed	Serine/threonine-protein kinase mTOR (EC 2.7.11.1) (FK506-binding protein 12-rapamycin complex-associated protein 1) (FKBP12-rapamycin complex-associated protein) (Mammalian target of rapamycin) (mTOR) (Mechanistic target of rapamycin) (Rapamycin and FKBP12 target 1) (Rapamycin target protein 1)	MTOR FRAP FRAP1 FRAP2 RAFT1 RAPT1	Homo sapiens (Human)	2549	SUBCELLULAR LOCATION: Endoplasmic reticulum membrane {ECO:0000269|PubMed:14578359}; Peripheral membrane protein {ECO:0000269|PubMed:14578359}; Cytoplasmic side {ECO:0000269|PubMed:14578359}. Golgi apparatus membrane {ECO:0000269|PubMed:14578359}; Peripheral membrane protein {ECO:0000269|PubMed:14578359}; Cytoplasmic side {ECO:0000269|PubMed:14578359}. Mitochondrion outer membrane {ECO:0000269|Pub…	Endoplasmic reticulum
P48449	ERG7_HUMAN	reviewed	Lanosterol synthase (EC 5.4.99.7) (2,3-epoxysqualene--lanosterol cyclase) (Oxidosqualene--lanosterol cyclase) (OSC) (hOSC)	LSS OSC	Homo sapiens (Human)	732	SUBCELLULAR LOCATION: Endoplasmic reticulum membrane {ECO:0000269|PubMed:14766201, ECO:0000269|PubMed:15525992}; Peripheral membrane protein {ECO:0000269|PubMed:14766201, ECO:0000269|PubMed:15525992}.	Endoplasmic reticulum
Q969V3	NCLN_HUMAN	reviewed	Nicalin (Nicastrin-like protein)	NCLN	Homo sapiens (Human)	563	SUBCELLULAR LOCATION: Endoplasmic reticulum membrane {ECO:0000269|PubMed:15257293, ECO:0000269|PubMed:20538592}; Single-pass membrane protein {ECO:0000269|PubMed:15257293, ECO:0000269|PubMed:20538592}.	Endoplasmic reticulum
Q8TCT9	HM13_HUMAN	reviewed	Minor histocompatibility antigen H13 (EC 3.4.23.-) (Intramembrane protease 1) (IMP-1) (IMPAS-1) (hIMP1) (Presenilin-like protein 3) (Signal peptide peptidase)	HM13 H13 IMP1 PSL3 SPP MSTP086	Homo sapiens (Human)	377	SUBCELLULAR LOCATION: Endoplasmic reticulum membrane {ECO:0000269|PubMed:15998642}; Multi-pass membrane protein {ECO:0000305}. Membrane {ECO:0000269|PubMed:12077416, ECO:0000269|PubMed:15385547}; Multi-pass membrane protein {ECO:0000305}; Lumenal side {ECO:0000269|PubMed:12077416, ECO:0000269|PubMed:15385547}.; SUBCELLULAR LOCATION: Isoform 4: Cell membrane {ECO:0000250|UniProtKB:Q9D8V0}; Multi-p…	Endoplasmic reticulum
P35610	SOAT1_HUMAN	reviewed	Sterol O-acyltransferase 1 (EC 2.3.1.26) (Acyl-coenzyme A:cholesterol acyltransferase 1) (ACAT-1) (Cholesterol acyltransferase 1)	SOAT1 ACACT ACACT1 ACAT ACAT1 SOAT STAT	Homo sapiens (Human)	550	SUBCELLULAR LOCATION: Endoplasmic reticulum membrane {ECO:0000269|PubMed:16154994}; Multi-pass membrane protein {ECO:0000269|PubMed:16154994}.	Endoplasmic reticulum
O94905	ERLN2_HUMAN	reviewed	Erlin-2 (Endoplasmic reticulum lipid raft-associated protein 2) (Stomatin-prohibitin-flotillin-HflC/K domain-containing protein 2) (SPFH domain-containing protein 2)	ERLIN2 C8orf2 SPFH2 UNQ2441/PRO5003/PRO9924	Homo sapiens (Human)	339	SUBCELLULAR LOCATION: Endoplasmic reticulum membrane {ECO:0000269|PubMed:16835267, ECO:0000269|PubMed:17502376, ECO:0000269|PubMed:19240031}; Single-pass type II membrane protein {ECO:0000269|PubMed:16835267, ECO:0000269|PubMed:17502376, ECO:0000269|PubMed:19240031}. Note=Associated with lipid raft-like domains of the endoplasmic reticulum membrane.	Endoplasmic reticulum
Q6DD88	ATLA3_HUMAN	reviewed	Atlastin-3 (EC 3.6.5.-)	ATL3	Homo sapiens (Human)	541	SUBCELLULAR LOCATION: Endoplasmic reticulum membrane {ECO:0000269|PubMed:18270207, ECO:0000269|PubMed:24459106}; Multi-pass membrane protein {ECO:0000269|PubMed:18270207, ECO:0000269|PubMed:24459106}. Note=Localizes to endoplasmic reticulum tubules and accumulates in punctuate structures corresponding to 3-way junctions, which represent crossing-points at which the tubules build a polygonal netwo…	Endoplasmic reticulum
Q9P035	HACD3_HUMAN	reviewed	Very-long-chain (3R)-3-hydroxyacyl-CoA dehydratase 3 (EC 4.2.1.134) (3-hydroxyacyl-CoA dehydratase 3) (HACD3) (Butyrate-induced protein 1) (B-ind1) (hB-ind1) (Protein-tyrosine phosphatase-like A domain-containing protein 1)	HACD3 BIND1 PTPLAD1	Homo sapiens (Human)	362	SUBCELLULAR LOCATION: Endoplasmic reticulum membrane {ECO:0000269|PubMed:18554506}; Multi-pass membrane protein {ECO:0000269|PubMed:18554506}.	Endoplasmic reticulum
Q8NF37	PCAT1_HUMAN	reviewed	Lysophosphatidylcholine acyltransferase 1 (LPC acyltransferase 1) (LPCAT-1) (LysoPC acyltransferase 1) (EC 2.3.1.23) (1-acylglycerophosphocholine O-acyltransferase) (1-alkylglycerophosphocholine O-acetyltransferase) (EC 2.3.1.67) (Acetyl-CoA:lyso-platelet-activating factor acetyltransferase) (Acetyl-CoA:lyso-PAF acetyltransferase) (Lyso-PAF acetyltransferase) (LysoPAFAT) (Acyltransferase-like 2) …	LPCAT1 AYTL2 PFAAP3	Homo sapiens (Human)	534	SUBCELLULAR LOCATION: Endoplasmic reticulum membrane {ECO:0000269|PubMed:21498505}; Single-pass type II membrane protein {ECO:0000269|PubMed:21498505}. Golgi apparatus membrane {ECO:0000269|PubMed:21498505}; Single-pass type II membrane protein {ECO:0000269|PubMed:21498505}. Lipid droplet {ECO:0000269|PubMed:21498505}. Note=May adopt a monotopic topology when embedded in the lipid monolayer of th…	Endoplasmic reticulum
Q6NUQ4	TM214_HUMAN	reviewed	Transmembrane protein 214	TMEM214 PP446	Homo sapiens (Human)	689	SUBCELLULAR LOCATION: Endoplasmic reticulum membrane {ECO:0000269|PubMed:23661706}; Multi-pass membrane protein {ECO:0000269|PubMed:23661706}.	Endoplasmic reticulum
Q14643	ITPR1_HUMAN	reviewed	Inositol 1,4,5-trisphosphate receptor type 1 (IP3 receptor isoform 1) (IP3R 1) (InsP3R1) (Type 1 inositol 1,4,5-trisphosphate receptor) (Type 1 InsP3 receptor)	ITPR1 INSP3R1	Homo sapiens (Human)	2758	SUBCELLULAR LOCATION: Endoplasmic reticulum membrane {ECO:0000305|PubMed:27108798}; Multi-pass membrane protein {ECO:0000255}. Cytoplasmic vesicle, secretory vesicle membrane {ECO:0000250|UniProtKB:Q9TU34}; Multi-pass membrane protein {ECO:0000255}. Cytoplasm, perinuclear region {ECO:0000269|PubMed:27108798}. Note=Endoplasmic reticulum and secretory granules (By similarity). {ECO:0000250|UniProtK…	Endoplasmic reticulum
Q9BV10	ALG12_HUMAN	reviewed	Dol-P-Man:Man(7)GlcNAc(2)-PP-Dol alpha-1,6-mannosyltransferase (EC 2.4.1.260) (Asparagine-linked glycosylation protein 12 homolog) (hALG12) (Dolichyl-P-Man:Man(7)GlcNAc(2)-PP-dolichyl-alpha-1,6-mannosyltransferase) (Mannosyltransferase ALG12 homolog) (Membrane protein SB87)	ALG12 PP14673	Homo sapiens (Human)	488	SUBCELLULAR LOCATION: Endoplasmic reticulum membrane {ECO:0000305}; Multi-pass membrane protein {ECO:0000305}.	Endoplasmic reticulum
P61803	DAD1_HUMAN	reviewed	Dolichyl-diphosphooligosaccharide--protein glycosyltransferase subunit DAD1 (Oligosaccharyl transferase subunit DAD1) (Defender against cell death 1) (DAD-1)	DAD1	Homo sapiens (Human)	113	SUBCELLULAR LOCATION: Endoplasmic reticulum membrane; Multi-pass membrane protein {ECO:0000305}.	Endoplasmic reticulum
O14975	S27A2_HUMAN	reviewed	Very long-chain acyl-CoA synthetase (VLACS) (VLCS) (EC 6.2.1.-) (Fatty acid transport protein 2) (FATP-2) (Fatty-acid-coenzyme A ligase, very long-chain 1) (Long-chain-fatty-acid--CoA ligase) (EC 6.2.1.3) (Solute carrier family 27 member 2) (THCA-CoA ligase) (Very long-chain-fatty-acid-CoA ligase)	SLC27A2 ACSVL1 FACVL1 FATP2 VLACS	Homo sapiens (Human)	620	SUBCELLULAR LOCATION: Endoplasmic reticulum membrane; Multi-pass membrane protein. Peroxisome membrane; Multi-pass membrane protein. Note=Peripheral membrane associated with the lumenal side of peroxisomes.	Endoplasmic reticulum
Q86UP2	KTN1_HUMAN	reviewed	Kinectin (CG-1 antigen) (Kinesin receptor)	KTN1 CG1 KIAA0004	Homo sapiens (Human)	1357	SUBCELLULAR LOCATION: Endoplasmic reticulum membrane; Single-pass type II membrane protein. Note=Vesicle membrane protein anchored to the endoplasmic reticulum.	Endoplasmic reticulum
O95470	SGPL1_HUMAN	reviewed	Sphingosine-1-phosphate lyase 1 (S1PL) (SP-lyase 1) (SPL 1) (hSPL) (EC 4.1.2.27) (Sphingosine-1-phosphate aldolase)	SGPL1 KIAA1252	Homo sapiens (Human)	568	SUBCELLULAR LOCATION: Endoplasmic reticulum membrane; Single-pass type III membrane protein.	Endoplasmic reticulum
Q12907	LMAN2_HUMAN	reviewed	Vesicular integral-membrane protein VIP36 (Glycoprotein GP36b) (Lectin mannose-binding 2) (Vesicular integral-membrane protein 36) (VIP36)	LMAN2 C5orf8	Homo sapiens (Human)	356	SUBCELLULAR LOCATION: Endoplasmic reticulum-Golgi intermediate compartment membrane {ECO:0000269|PubMed:10444376}; Single-pass type I membrane protein {ECO:0000269|PubMed:10444376}. Golgi apparatus membrane {ECO:0000269|PubMed:10444376}; Single-pass membrane protein {ECO:0000269|PubMed:10444376}. Endoplasmic reticulum membrane {ECO:0000269|PubMed:10444376}; Single-pass type I membrane protein {EC…	Endoplasmic reticulum
Q15057	ACAP2_HUMAN	reviewed	Arf-GAP with coiled-coil, ANK repeat and PH domain-containing protein 2 (Centaurin-beta-2) (Cnt-b2)	ACAP2 CENTB2 KIAA0041	Homo sapiens (Human)	778	SUBCELLULAR LOCATION: Endosome membrane {ECO:0000250}; Peripheral membrane protein {ECO:0000250}.	Endoplasmic reticulum
Q32P28	P3H1_HUMAN	reviewed	Prolyl 3-hydroxylase 1 (EC 1.14.11.7) (Growth suppressor 1) (Leucine- and proline-enriched proteoglycan 1) (Leprecan-1)	P3H1 GROS1 LEPRE1 PSEC0109	Homo sapiens (Human)	736	SUBCELLULAR LOCATION: Isoform 1: Endoplasmic reticulum.; SUBCELLULAR LOCATION: Secreted, extracellular space, extracellular matrix {ECO:0000250}. Note=Secreted into the extracellular matrix as a chondroitin sulfate proteoglycan (CSPG). {ECO:0000269|PubMed:19088120}.	Endoplasmic reticulum
Q6PIU2	NCEH1_HUMAN	reviewed	Neutral cholesterol ester hydrolase 1 (NCEH) (EC 3.1.1.-) (Arylacetamide deacetylase-like 1)	NCEH1 AADACL1 KIAA1363	Homo sapiens (Human)	408	SUBCELLULAR LOCATION: Membrane {ECO:0000305|PubMed:12149457}; Single-pass type II membrane protein {ECO:0000305|PubMed:12149457}. Microsome {ECO:0000250}.	Endoplasmic reticulum
Q9H3N1	TMX1_HUMAN	reviewed	Thioredoxin-related transmembrane protein 1 (Thioredoxin domain-containing protein 1) (Transmembrane Trx-related protein)	TMX1 TMX TXNDC TXNDC1 PSEC0085 UNQ235/PRO268	Homo sapiens (Human)	280	SUBCELLULAR LOCATION: Membrane {ECO:0000305}; Single-pass type I membrane protein {ECO:0000305}. Endoplasmic reticulum membrane {ECO:0000305}; Single-pass type I membrane protein {ECO:0000305}. Note=Predominantly found in the endoplasmic reticulum. {ECO:0000269|PubMed:11152479}.	Endoplasmic reticulum
Q96AG4	LRC59_HUMAN	reviewed	Leucine-rich repeat-containing protein 59 (Ribosome-binding protein p34) (p34)	LRRC59 PRO1855	Homo sapiens (Human)	307	SUBCELLULAR LOCATION: Microsome membrane {ECO:0000250}; Single-pass type II membrane protein {ECO:0000250}. Endoplasmic reticulum membrane; Single-pass type II membrane protein. Nucleus envelope. Note=Localization in the nuclear envelope depends upon the nuclear import machinery, including KPNB1.	Endoplasmic reticulum
A8K3B4	A8K3B4_HUMAN	unreviewed	NADPH--cytochrome P450 reductase (CPR) (p450R) (EC 1.6.2.4)	POR	Homo sapiens (Human)	680		Endoplasmic reticulum
B2R6E5	B2R6E5_HUMAN	unreviewed	NADPH--cytochrome P450 reductase (CPR) (p450R) (EC 1.6.2.4)	POR	Homo sapiens (Human)	680		Endoplasmic reticulum
B7Z591	B7Z591_HUMAN	unreviewed	Calcium load-activated calcium channel (CLAC channel)	TMCO1 hCG_1766418	Homo sapiens (Human)	176		Endoplasmic reticulum
Q63HL4	Q63HL4_HUMAN	unreviewed	NADPH--cytochrome P450 reductase (CPR) (p450R) (EC 1.6.2.4)	DKFZp686G04235 POR	Homo sapiens (Human)	680		Endoplasmic reticulum
Q2M389	WASC4_HUMAN	reviewed	WASH complex subunit 4 (Strumpellin and WASH-interacting protein) (SWIP) (WASH complex subunit SWIP)	WASHC4 KIAA1033	Homo sapiens (Human)	1173	SUBCELLULAR LOCATION: Early endosome {ECO:0000269|PubMed:23676666}.	Endosome
Q9P253	VPS18_HUMAN	reviewed	Vacuolar protein sorting-associated protein 18 homolog (hVPS18)	VPS18 KIAA1475	Homo sapiens (Human)	973	SUBCELLULAR LOCATION: Late endosome membrane {ECO:0000269|PubMed:11382755}; Peripheral membrane protein {ECO:0000269|PubMed:11382755}; Cytoplasmic side {ECO:0000305}. Lysosome membrane {ECO:0000269|PubMed:11382755}; Peripheral membrane protein {ECO:0000269|PubMed:11382755}; Cytoplasmic side {ECO:0000305}. Early endosome {ECO:0000269|PubMed:18552835}. Cytoplasmic vesicle, autophagosome {ECO:000030…	Endosome
Q14C86	GAPD1_HUMAN	reviewed	GTPase-activating protein and VPS9 domain-containing protein 1 (GAPex-5) (Rab5-activating protein 6)	GAPVD1 GAPEX5 KIAA1521 RAP6	Homo sapiens (Human)	1478	SUBCELLULAR LOCATION: Membrane {ECO:0000269|PubMed:16410077}; Peripheral membrane protein {ECO:0000269|PubMed:16410077}. Endosome {ECO:0000269|PubMed:16410077}. Note=Recruited to the plasma membrane by TRIP10/CIP4 in response to insulin.	Endosome
O75351	VPS4B_HUMAN	reviewed	Vacuolar protein sorting-associated protein 4B (EC 3.6.4.6) (Cell migration-inducing gene 1 protein) (Suppressor of K(+) transport growth defect 1) (Protein SKD1)	VPS4B SKD1 VPS42 MIG1	Homo sapiens (Human)	444	SUBCELLULAR LOCATION: Prevacuolar compartment membrane; Peripheral membrane protein. Late endosome membrane {ECO:0000305}; Peripheral membrane protein {ECO:0000305}. Note=Membrane-associated in the prevacuolar endosomal compartment. Localized in HIV-1 particles purified from acutely infected cells.	Endosome
O95235	KI20A_HUMAN	reviewed	Kinesin-like protein KIF20A (GG10_2) (Mitotic kinesin-like protein 2) (MKlp2) (Rab6-interacting kinesin-like protein) (Rabkinesin-6)	KIF20A MKLP2 RAB6KIFL	Homo sapiens (Human)	890	SUBCELLULAR LOCATION: Golgi apparatus {ECO:0000250}. Cytoplasm, cytoskeleton, spindle {ECO:0000269|PubMed:12939256}.	Golgi apparatus
O43747	AP1G1_HUMAN	reviewed	AP-1 complex subunit gamma-1 (Adaptor protein complex AP-1 subunit gamma-1) (Adaptor-related protein complex 1 subunit gamma-1) (Clathrin assembly protein complex 1 gamma-1 large chain) (Gamma1-adaptin) (Golgi adaptor HA1/AP1 adaptin subunit gamma-1)	AP1G1 ADTG CLAPG1	Homo sapiens (Human)	822	SUBCELLULAR LOCATION: Golgi apparatus {ECO:0000269|PubMed:12773381}. Cytoplasmic vesicle, clathrin-coated vesicle membrane {ECO:0000269|PubMed:12773381}; Peripheral membrane protein {ECO:0000269|PubMed:12773381}; Cytoplasmic side {ECO:0000269|PubMed:12773381}. Note=Component of the coat surrounding the cytoplasmic face of coated vesicles located at the Golgi complex.	Golgi apparatus
Q96M27	PRRC1_HUMAN	reviewed	Protein PRRC1 (Proline-rich and coiled-coil-containing protein 1)	PRRC1	Homo sapiens (Human)	445	SUBCELLULAR LOCATION: Golgi apparatus {ECO:0000269|PubMed:15541471}.	Golgi apparatus
Q5T9L3	WLS_HUMAN	reviewed	Protein wntless homolog (Integral membrane protein GPR177) (Protein evenness interrupted homolog) (EVI) (Putative NF-kappa-B-activating protein 373)	WLS C1orf139 GPR177 UNQ85/PRO18667	Homo sapiens (Human)	541	SUBCELLULAR LOCATION: Golgi apparatus membrane {ECO:0000269|PubMed:16678095}; Multi-pass membrane protein {ECO:0000269|PubMed:16678095}. Cytoplasmic vesicle membrane {ECO:0000269|PubMed:16678095}; Multi-pass membrane protein {ECO:0000269|PubMed:16678095}. Cell membrane {ECO:0000269|PubMed:18160347}; Multi-pass membrane protein {ECO:0000255}. Endoplasmic reticulum membrane {ECO:0000269|PubMed:1816…	Golgi apparatus
Q8WTW3	COG1_HUMAN	reviewed	Conserved oligomeric Golgi complex subunit 1 (COG complex subunit 1) (Component of oligomeric Golgi complex 1)	COG1 KIAA1381 LDLB	Homo sapiens (Human)	980	SUBCELLULAR LOCATION: Golgi apparatus membrane {ECO:0000305|PubMed:11980916}; Peripheral membrane protein {ECO:0000305|PubMed:11980916}; Cytoplasmic side {ECO:0000305|PubMed:11980916}.	Golgi apparatus
Q6NTF9	RHBD2_HUMAN	reviewed	Rhomboid domain-containing protein 2	RHBDD2 RHBDL7	Homo sapiens (Human)	364	SUBCELLULAR LOCATION: Golgi apparatus, cis-Golgi network membrane {ECO:0000250}; Multi-pass membrane protein {ECO:0000250}.	Golgi apparatus
Q9H4A6	GOLP3_HUMAN	reviewed	Golgi phosphoprotein 3 (Coat protein GPP34) (Mitochondrial DNA absence factor) (MIDAS)	GOLPH3 GPP34	Homo sapiens (Human)	298	SUBCELLULAR LOCATION: Golgi apparatus, Golgi stack membrane; Peripheral membrane protein; Cytoplasmic side. Golgi apparatus, trans-Golgi network membrane; Peripheral membrane protein; Cytoplasmic side. Mitochondrion intermembrane space. Cell membrane {ECO:0000250}. Endosome {ECO:0000250}. Note=Phosphatidylinositol 4-phosphate-binding and oligomerization participate in the recruitment onto Golgi m…	Golgi apparatus
Q10567	AP1B1_HUMAN	reviewed	AP-1 complex subunit beta-1 (Adaptor protein complex AP-1 subunit beta-1) (Adaptor-related protein complex 1 subunit beta-1) (Beta-1-adaptin) (Beta-adaptin 1) (Clathrin assembly protein complex 1 beta large chain) (Golgi adaptor HA1/AP1 adaptin beta subunit)	AP1B1 ADTB1 BAM22 CLAPB2	Homo sapiens (Human)	949	SUBCELLULAR LOCATION: Golgi apparatus. Cytoplasmic vesicle, clathrin-coated vesicle membrane; Peripheral membrane protein; Cytoplasmic side. Note=Component of the coat surrounding the cytoplasmic face of coated vesicles located at the Golgi complex.	Golgi apparatus
Q8NBN3	TM87A_HUMAN	reviewed	Transmembrane protein 87A	TMEM87A PSEC0094	Homo sapiens (Human)	555	SUBCELLULAR LOCATION: Membrane {ECO:0000305}; Multi-pass membrane protein {ECO:0000305}.	Golgi apparatus
Q13618	CUL3_HUMAN	reviewed	Cullin-3 (CUL-3)	CUL3 KIAA0617	Homo sapiens (Human)	768	SUBCELLULAR LOCATION: Nucleus. Golgi apparatus.	Golgi apparatus
P48448	AL3B2_HUMAN	reviewed	Aldehyde dehydrogenase family 3 member B2 (EC 1.2.1.5) (Aldehyde dehydrogenase 8)	ALDH3B2 ALDH8	Homo sapiens (Human)	385	SUBCELLULAR LOCATION: Lipid droplet {ECO:0000250|UniProtKB:E9Q3E1}.	Lipid droplet
P86790	CCZ1B_HUMAN	reviewed	Vacuolar fusion protein CCZ1 homolog B (Vacuolar fusion protein CCZ1 homolog-like)	CCZ1B C7orf28B	Homo sapiens (Human)	482	SUBCELLULAR LOCATION: Lysosome membrane {ECO:0000269|PubMed:17897319}.	Lysosome
P07711	CATL1_HUMAN	reviewed	Cathepsin L1 (EC 3.4.22.15) (Cathepsin L) (Major excreted protein) (MEP) [Cleaved into: Cathepsin L1 heavy chain; Cathepsin L1 light chain]	CTSL CTSL1	Homo sapiens (Human)	333	SUBCELLULAR LOCATION: Lysosome.	Lysosome
P10619	PPGB_HUMAN	reviewed	Lysosomal protective protein (EC 3.4.16.5) (Carboxypeptidase C) (Carboxypeptidase L) (Cathepsin A) (Protective protein cathepsin A) (PPCA) (Protective protein for beta-galactosidase) [Cleaved into: Lysosomal protective protein 32 kDa chain; Lysosomal protective protein 20 kDa chain]	CTSA PPGB	Homo sapiens (Human)	480	SUBCELLULAR LOCATION: Lysosome.	Lysosome
P38571	LICH_HUMAN	reviewed	Lysosomal acid lipase/cholesteryl ester hydrolase (Acid cholesteryl ester hydrolase) (LAL) (EC 3.1.1.13) (Cholesteryl esterase) (Lipase A) (Sterol esterase)	LIPA	Homo sapiens (Human)	399	SUBCELLULAR LOCATION: Lysosome.	Lysosome
Q92820	GGH_HUMAN	reviewed	Gamma-glutamyl hydrolase (EC 3.4.19.9) (Conjugase) (GH) (Gamma-Glu-X carboxypeptidase)	GGH	Homo sapiens (Human)	318	SUBCELLULAR LOCATION: Secreted, extracellular space {ECO:0000305}. Lysosome {ECO:0000269|PubMed:12643545}. Melanosome {ECO:0000269|PubMed:12643545}. Note=While its intracellular location is primarily the lysosome, most of the enzyme activity is secreted. Identified by mass spectrometry in melanosome fractions from stage I to stage IV. {ECO:0000269|PubMed:12643545}.	Lysosome
B2R6A3	B2R6A3_HUMAN	unreviewed	Na(+)/H(+) exchange regulatory cofactor NHE-RF		Homo sapiens (Human)	358	SUBCELLULAR LOCATION: Endomembrane system {ECO:0000256|PIRNR:PIRNR037866}; Peripheral membrane protein {ECO:0000256|PIRNR:PIRNR037866}.	Membrane
P21281	VATB2_HUMAN	reviewed	V-type proton ATPase subunit B, brain isoform (V-ATPase subunit B 2) (Endomembrane proton pump 58 kDa subunit) (HO57) (Vacuolar proton pump subunit B 2)	ATP6V1B2 ATP6B2 VPP3	Homo sapiens (Human)	511	SUBCELLULAR LOCATION: Endomembrane system; Peripheral membrane protein. Melanosome. Note=Endomembrane. Identified by mass spectrometry in melanosome fractions from stage I to stage IV.	Membrane
E7EQW5	E7EQW5_HUMAN	unreviewed	Integrin beta (Fragment)	ITGB1	Homo sapiens (Human)	163	SUBCELLULAR LOCATION: Membrane {ECO:0000256|RuleBase:RU000633}; Single-pass type I membrane protein {ECO:0000256|RuleBase:RU000633}.	Membrane
A0A024R6I3	A0A024R6I3_HUMAN	unreviewed	Testicular tissue protein Li 206 (Transmembrane emp24-like trafficking protein 10 (Yeast), isoform CRA_a)	TMED10 hCG_22348	Homo sapiens (Human)	219	SUBCELLULAR LOCATION: Membrane {ECO:0000256|RuleBase:RU003827}; Single-pass type I membrane protein {ECO:0000256|RuleBase:RU003827}.	Membrane
Q53GF9	Q53GF9_HUMAN	unreviewed	Full-length cDNA 5-PRIME end of clone CS0DF013YM24 of Fetal brain of Homo sapiens (Human) variant (Fragment)		Homo sapiens (Human)	225	SUBCELLULAR LOCATION: Membrane {ECO:0000256|RuleBase:RU003827}; Single-pass type I membrane protein {ECO:0000256|RuleBase:RU003827}.	Membrane
E9PMR4	E9PMR4_HUMAN	unreviewed	Tetraspanin	CD151	Homo sapiens (Human)	251	SUBCELLULAR LOCATION: Membrane {ECO:0000256|RuleBase:RU361218}; Multi-pass membrane protein {ECO:0000256|RuleBase:RU361218}.	Membrane
A6NGH2	A6NGH2_HUMAN	unreviewed	Sodium/potassium-transporting ATPase subunit beta		Homo sapiens (Human)	295	SUBCELLULAR LOCATION: Membrane {ECO:0000256|RuleBase:RU362099}; Single-pass type II membrane protein {ECO:0000256|RuleBase:RU362099}.	Membrane
Q6LEU2	Q6LEU2_HUMAN	unreviewed	Sodium/potassium-transporting ATPase subunit beta (Fragment)	ATP1B1	Homo sapiens (Human)	303	SUBCELLULAR LOCATION: Membrane {ECO:0000256|RuleBase:RU362099}; Single-pass type II membrane protein {ECO:0000256|RuleBase:RU362099}.	Membrane
Q6FHJ5	Q6FHJ5_HUMAN	unreviewed	Secretory carrier-associated membrane protein (Secretory carrier membrane protein) (Fragment)	SCAMP3	Homo sapiens (Human)	347	SUBCELLULAR LOCATION: Membrane {ECO:0000256|RuleBase:RU363122}; Multi-pass membrane protein {ECO:0000256|RuleBase:RU363122}.	Membrane
Q15165	PON2_HUMAN	reviewed	Serum paraoxonase/arylesterase 2 (PON 2) (EC 3.1.1.2) (EC 3.1.1.81) (Aromatic esterase 2) (A-esterase 2) (Serum aryldialkylphosphatase 2)	PON2	Homo sapiens (Human)	354	SUBCELLULAR LOCATION: Membrane {ECO:0000269|PubMed:11579088}; Peripheral membrane protein {ECO:0000269|PubMed:11579088}.	Membrane
Q9UPY5	XCT_HUMAN	reviewed	Cystine/glutamate transporter (Amino acid transport system xc-) (Calcium channel blocker resistance protein CCBR1) (Solute carrier family 7 member 11) (xCT)	SLC7A11	Homo sapiens (Human)	501	SUBCELLULAR LOCATION: Membrane {ECO:0000269|PubMed:15151999}; Multi-pass membrane protein {ECO:0000269|PubMed:15151999}.	Membrane
Q8N766	EMC1_HUMAN	reviewed	ER membrane protein complex subunit 1	EMC1 KIAA0090 PSEC0263	Homo sapiens (Human)	993	SUBCELLULAR LOCATION: Membrane {ECO:0000269|PubMed:22119785}; Single-pass type I membrane protein {ECO:0000269|PubMed:22119785}.	Membrane
Q6EMK4	VASN_HUMAN	reviewed	Vasorin (Protein slit-like 2)	VASN SLITL2 UNQ314/PRO357/PRO1282	Homo sapiens (Human)	673	SUBCELLULAR LOCATION: Membrane {ECO:0000305|PubMed:15247411}; Single-pass type I membrane protein {ECO:0000305|PubMed:15247411}. Secreted {ECO:0000269|PubMed:15247411}.	Membrane
Q5VW32	BROX_HUMAN	reviewed	BRO1 domain-containing protein BROX (BRO1 domain- and CAAX motif-containing protein)	BROX BROFTI C1orf58	Homo sapiens (Human)	411	SUBCELLULAR LOCATION: Membrane {ECO:0000305}; Lipid-anchor {ECO:0000305}.	Membrane
O96005	CLPT1_HUMAN	reviewed	Cleft lip and palate transmembrane protein 1	CLPTM1	Homo sapiens (Human)	669	SUBCELLULAR LOCATION: Membrane {ECO:0000305}; Multi-pass membrane protein {ECO:0000305}.	Membrane
Q14432	PDE3A_HUMAN	reviewed	cGMP-inhibited 3',5'-cyclic phosphodiesterase A (EC 3.1.4.17) (Cyclic GMP-inhibited phosphodiesterase A) (CGI-PDE A)	PDE3A	Homo sapiens (Human)	1141	SUBCELLULAR LOCATION: Membrane {ECO:0000305}; Multi-pass membrane protein {ECO:0000305}.	Membrane
Q5BJH7	YIF1B_HUMAN	reviewed	Protein YIF1B (YIP1-interacting factor homolog B)	YIF1B PP4519 UNQ3073/PRO9905	Homo sapiens (Human)	314	SUBCELLULAR LOCATION: Membrane {ECO:0000305}; Multi-pass membrane protein {ECO:0000305}.	Membrane
Q86VR2	RETR3_HUMAN	reviewed	Reticulophagy regulator 3	RETREG3 FAM134C	Homo sapiens (Human)	466	SUBCELLULAR LOCATION: Membrane {ECO:0000305}; Multi-pass membrane protein {ECO:0000305}.	Membrane
Q96KA5	CLP1L_HUMAN	reviewed	Cleft lip and palate transmembrane protein 1-like protein (CLPTM1-like protein) (Cisplatin resistance-related protein 9) (CRR9p)	CLPTM1L CRR9	Homo sapiens (Human)	538	SUBCELLULAR LOCATION: Membrane {ECO:0000305}; Multi-pass membrane protein {ECO:0000305}.	Membrane
Q96N66	MBOA7_HUMAN	reviewed	Lysophospholipid acyltransferase 7 (LPLAT 7) (EC 2.3.1.-) (1-acylglycerophosphatidylinositol O-acyltransferase) (EC 2.3.1.n4) (Bladder and breast carcinoma-overexpressed gene 1 protein) (Leukocyte receptor cluster member 4) (Lysophosphatidylinositol acyltransferase) (LPIAT) (Lyso-PI acyltransferase) (Membrane-bound O-acyltransferase domain-containing protein 7) (O-acyltransferase domain-containin…	MBOAT7 BB1 LENG4 OACT7	Homo sapiens (Human)	472	SUBCELLULAR LOCATION: Membrane {ECO:0000305}; Multi-pass membrane protein {ECO:0000305}.	Membrane
Q9C0D9	EPT1_HUMAN	reviewed	Ethanolaminephosphotransferase 1 (hEPT1) (EC 2.7.8.1) (Selenoprotein I) (SelI)	SELENOI EPT1 KIAA1724 SELI	Homo sapiens (Human)	397	SUBCELLULAR LOCATION: Membrane {ECO:0000305}; Multi-pass membrane protein {ECO:0000305}.	Membrane
Q66K14	TBC9B_HUMAN	reviewed	TBC1 domain family member 9B	TBC1D9B KIAA0676	Homo sapiens (Human)	1250	SUBCELLULAR LOCATION: Membrane {ECO:0000305}; Single-pass membrane protein {ECO:0000305}.	Membrane
Q96A33	CCD47_HUMAN	reviewed	Coiled-coil domain-containing protein 47	CCDC47 GK001 MSTP041 PSEC0077	Homo sapiens (Human)	483	SUBCELLULAR LOCATION: Membrane {ECO:0000305}; Single-pass membrane protein {ECO:0000305}.	Membrane
O14828	SCAM3_HUMAN	reviewed	Secretory carrier-associated membrane protein 3 (Secretory carrier membrane protein 3)	SCAMP3 C1orf3 PROPIN1	Homo sapiens (Human)	347	SUBCELLULAR LOCATION: Membrane; Multi-pass membrane protein.	Membrane
P48509	CD151_HUMAN	reviewed	CD151 antigen (GP27) (Membrane glycoprotein SFA-1) (Platelet-endothelial tetraspan antigen 3) (PETA-3) (Tetraspanin-24) (Tspan-24) (CD antigen CD151)	CD151 TSPAN24	Homo sapiens (Human)	253	SUBCELLULAR LOCATION: Membrane; Multi-pass membrane protein.	Membrane
A1L0T0	ILVBL_HUMAN	reviewed	Acetolactate synthase-like protein (EC 2.2.1.-) (IlvB-like protein)	ILVBL AHAS	Homo sapiens (Human)	632	SUBCELLULAR LOCATION: Membrane; Single-pass membrane protein.	Membrane
P10321	1C07_HUMAN	reviewed	HLA class I histocompatibility antigen, Cw-7 alpha chain (MHC class I antigen Cw*7)	HLA-C HLAC	Homo sapiens (Human)	366	SUBCELLULAR LOCATION: Membrane; Single-pass type I membrane protein.	Membrane
P30479	1B41_HUMAN	reviewed	HLA class I histocompatibility antigen, B-41 alpha chain (Bw-41) (MHC class I antigen B*41)	HLA-B HLAB	Homo sapiens (Human)	362	SUBCELLULAR LOCATION: Membrane; Single-pass type I membrane protein.	Membrane
P30480	1B42_HUMAN	reviewed	HLA class I histocompatibility antigen, B-42 alpha chain (MHC class I antigen B*42)	HLA-B HLAB	Homo sapiens (Human)	362	SUBCELLULAR LOCATION: Membrane; Single-pass type I membrane protein.	Membrane
P30499	1C01_HUMAN	reviewed	HLA class I histocompatibility antigen, Cw-1 alpha chain (MHC class I antigen Cw*1)	HLA-C HLAC	Homo sapiens (Human)	366	SUBCELLULAR LOCATION: Membrane; Single-pass type I membrane protein.	Membrane
Q07000	1C15_HUMAN	reviewed	HLA class I histocompatibility antigen, Cw-15 alpha chain (MHC class I antigen Cw*15)	HLA-C HLAC	Homo sapiens (Human)	366	SUBCELLULAR LOCATION: Membrane; Single-pass type I membrane protein.	Membrane
Q29963	1C06_HUMAN	reviewed	HLA class I histocompatibility antigen, Cw-6 alpha chain (MHC class I antigen Cw*6)	HLA-C HLAC	Homo sapiens (Human)	366	SUBCELLULAR LOCATION: Membrane; Single-pass type I membrane protein.	Membrane
Q8TBP6	S2540_HUMAN	reviewed	Solute carrier family 25 member 40 (Mitochondrial carrier family protein)	SLC25A40 MCFP	Homo sapiens (Human)	338	SUBCELLULAR LOCATION: Mitochondrion inner membrane {ECO:0000250}; Multi-pass membrane protein {ECO:0000250}.	Mitochondrion
B4DKR1	B4DKR1_HUMAN	unreviewed	MICOS complex subunit MIC60 (Mitofilin)		Homo sapiens (Human)	746	SUBCELLULAR LOCATION: Mitochondrion inner membrane {ECO:0000256|RuleBase:RU363000, ECO:0000256|SAAS:SAAS00545102}; Single-pass membrane protein {ECO:0000256|RuleBase:RU363000, ECO:0000256|SAAS:SAAS00545102}.	Mitochondrion
B4DQY2	B4DQY2_HUMAN	unreviewed	MICOS complex subunit MIC60 (Mitofilin)		Homo sapiens (Human)	711	SUBCELLULAR LOCATION: Mitochondrion inner membrane {ECO:0000256|RuleBase:RU363000, ECO:0000256|SAAS:SAAS00545102}; Single-pass membrane protein {ECO:0000256|RuleBase:RU363000, ECO:0000256|SAAS:SAAS00545102}.	Mitochondrion
B4DS66	B4DS66_HUMAN	unreviewed	MICOS complex subunit MIC60 (Mitofilin)		Homo sapiens (Human)	660	SUBCELLULAR LOCATION: Mitochondrion inner membrane {ECO:0000256|RuleBase:RU363000, ECO:0000256|SAAS:SAAS00545102}; Single-pass membrane protein {ECO:0000256|RuleBase:RU363000, ECO:0000256|SAAS:SAAS00545102}.	Mitochondrion
B4DT20	B4DT20_HUMAN	unreviewed	MICOS complex subunit MIC60 (Mitofilin)		Homo sapiens (Human)	659	SUBCELLULAR LOCATION: Mitochondrion inner membrane {ECO:0000256|RuleBase:RU363000, ECO:0000256|SAAS:SAAS00545102}; Single-pass membrane protein {ECO:0000256|RuleBase:RU363000, ECO:0000256|SAAS:SAAS00545102}.	Mitochondrion
B9A067	B9A067_HUMAN	unreviewed	MICOS complex subunit MIC60 (Mitofilin)	IMMT	Homo sapiens (Human)	711	SUBCELLULAR LOCATION: Mitochondrion inner membrane {ECO:0000256|RuleBase:RU363000, ECO:0000256|SAAS:SAAS00545102}; Single-pass membrane protein {ECO:0000256|RuleBase:RU363000, ECO:0000256|SAAS:SAAS00545102}.	Mitochondrion
C9J406	C9J406_HUMAN	unreviewed	MICOS complex subunit MIC60 (Mitofilin)	IMMT	Homo sapiens (Human)	659	SUBCELLULAR LOCATION: Mitochondrion inner membrane {ECO:0000256|RuleBase:RU363000, ECO:0000256|SAAS:SAAS00545102}; Single-pass membrane protein {ECO:0000256|RuleBase:RU363000, ECO:0000256|SAAS:SAAS00545102}.	Mitochondrion
H7C463	H7C463_HUMAN	unreviewed	MICOS complex subunit MIC60 (Mitofilin) (Fragment)	IMMT	Homo sapiens (Human)	613	SUBCELLULAR LOCATION: Mitochondrion inner membrane {ECO:0000256|RuleBase:RU363000, ECO:0000256|SAAS:SAAS00545102}; Single-pass membrane protein {ECO:0000256|RuleBase:RU363000, ECO:0000256|SAAS:SAAS00545102}.	Mitochondrion
G3V0I5	G3V0I5_HUMAN	unreviewed	NADH dehydrogenase [ubiquinone] flavoprotein 1, mitochondrial (EC 1.6.5.3) (EC 1.6.99.3)	NDUFV1 hCG_21057	Homo sapiens (Human)	457	SUBCELLULAR LOCATION: Mitochondrion inner membrane {ECO:0000256|RuleBase:RU364066}; Peripheral membrane protein {ECO:0000256|RuleBase:RU364066}; Matrix side {ECO:0000256|RuleBase:RU364066}.	Mitochondrion
Q53G70	Q53G70_HUMAN	unreviewed	NADH dehydrogenase [ubiquinone] flavoprotein 1, mitochondrial (EC 1.6.5.3) (EC 1.6.99.3) (Fragment)		Homo sapiens (Human)	464	SUBCELLULAR LOCATION: Mitochondrion inner membrane {ECO:0000256|RuleBase:RU364066}; Peripheral membrane protein {ECO:0000256|RuleBase:RU364066}; Matrix side {ECO:0000256|RuleBase:RU364066}.	Mitochondrion
O60313	OPA1_HUMAN	reviewed	Dynamin-like 120 kDa protein, mitochondrial (EC 3.6.5.5) (Optic atrophy protein 1) [Cleaved into: Dynamin-like 120 kDa protein, form S1]	OPA1 KIAA0567	Homo sapiens (Human)	960	SUBCELLULAR LOCATION: Mitochondrion inner membrane {ECO:0000269|PubMed:11017079, ECO:0000269|PubMed:16778770}; Single-pass membrane protein {ECO:0000255}. Mitochondrion intermembrane space {ECO:0000250|UniProtKB:P58281}.	Mitochondrion
Q3ZCQ8	TIM50_HUMAN	reviewed	Mitochondrial import inner membrane translocase subunit TIM50	TIMM50 TIM50 PRO1512	Homo sapiens (Human)	353	SUBCELLULAR LOCATION: Mitochondrion inner membrane {ECO:0000269|PubMed:15044455, ECO:0000269|PubMed:16008839}; Single-pass membrane protein {ECO:0000269|PubMed:15044455, ECO:0000269|PubMed:16008839}.; SUBCELLULAR LOCATION: Isoform 2: Nucleus speckle. Note=Nuclear and enriched in speckles with snRNPs.	Mitochondrion
Q6NUK1	SCMC1_HUMAN	reviewed	Calcium-binding mitochondrial carrier protein SCaMC-1 (Mitochondrial ATP-Mg/Pi carrier protein 1) (Mitochondrial Ca(2+)-dependent solute carrier protein 1) (Small calcium-binding mitochondrial carrier protein 1) (Solute carrier family 25 member 24)	SLC25A24 APC1 MCSC1 SCAMC1	Homo sapiens (Human)	477	SUBCELLULAR LOCATION: Mitochondrion inner membrane {ECO:0000269|PubMed:15054102, ECO:0000269|PubMed:15123600, ECO:0000269|PubMed:22015608}; Multi-pass membrane protein {ECO:0000269|PubMed:15054102, ECO:0000269|PubMed:15123600, ECO:0000269|PubMed:22015608}.	Mitochondrion
Q9BPX6	MICU1_HUMAN	reviewed	Calcium uptake protein 1, mitochondrial (Atopy-related autoantigen CALC) (ara CALC) (Calcium-binding atopy-related autoantigen 1) (allergen Hom s 4)	MICU1 CALC CBARA1	Homo sapiens (Human)	476	SUBCELLULAR LOCATION: Mitochondrion inner membrane {ECO:0000269|PubMed:20693986, ECO:0000269|PubMed:24332854, ECO:0000269|PubMed:26387864, ECO:0000269|PubMed:26774479, ECO:0000269|PubMed:27099988, ECO:0000305|PubMed:24231807}; Single-pass membrane protein {ECO:0000255}. Mitochondrion intermembrane space {ECO:0000269|PubMed:23747253, ECO:0000269|PubMed:24560927, ECO:0000269|PubMed:26387864}. Note=…	Mitochondrion
Q96CU9	FXRD1_HUMAN	reviewed	FAD-dependent oxidoreductase domain-containing protein 1 (EC 1.-.-.-)	FOXRED1 FP634	Homo sapiens (Human)	486	SUBCELLULAR LOCATION: Mitochondrion inner membrane {ECO:0000269|PubMed:20858599, ECO:0000305|PubMed:25678554}; Single-pass membrane protein {ECO:0000255}. Note=According to a report, it is associated with the matrix face of the mitochondrial inner membrane and does not contain any transmembrane region. However, one transmembrane domain is clearly predicted by different methods (Probable). {ECO:00…	Mitochondrion
Q16891	MIC60_HUMAN	reviewed	MICOS complex subunit MIC60 (Cell proliferation-inducing gene 4/52 protein) (Mitochondrial inner membrane protein) (Mitofilin) (p87/89)	IMMT HMP MIC60 MINOS2 PIG4 PIG52	Homo sapiens (Human)	758	SUBCELLULAR LOCATION: Mitochondrion inner membrane {ECO:0000269|PubMed:25764979, ECO:0000269|PubMed:25997101}; Single-pass membrane protein {ECO:0000255}. Mitochondrion {ECO:0000269|PubMed:25781180}.	Mitochondrion
P54886	P5CS_HUMAN	reviewed	Delta-1-pyrroline-5-carboxylate synthase (P5CS) (Aldehyde dehydrogenase family 18 member A1) [Includes: Glutamate 5-kinase (GK) (EC 2.7.2.11) (Gamma-glutamyl kinase); Gamma-glutamyl phosphate reductase (GPR) (EC 1.2.1.41) (Glutamate-5-semialdehyde dehydrogenase) (Glutamyl-gamma-semialdehyde dehydrogenase)]	ALDH18A1 GSAS P5CS PYCS	Homo sapiens (Human)	795	SUBCELLULAR LOCATION: Mitochondrion inner membrane {ECO:0000269|PubMed:26297558, ECO:0000269|PubMed:26320891}.	Mitochondrion
O75746	CMC1_HUMAN	reviewed	Calcium-binding mitochondrial carrier protein Aralar1 (Mitochondrial aspartate glutamate carrier 1) (Solute carrier family 25 member 12)	SLC25A12 ARALAR1	Homo sapiens (Human)	678	SUBCELLULAR LOCATION: Mitochondrion inner membrane {ECO:0000269|PubMed:9722566}; Multi-pass membrane protein {ECO:0000269|PubMed:9722566}.	Mitochondrion
O75027	ABCB7_HUMAN	reviewed	ATP-binding cassette sub-family B member 7, mitochondrial (ATP-binding cassette transporter 7) (ABC transporter 7 protein)	ABCB7 ABC7	Homo sapiens (Human)	752	SUBCELLULAR LOCATION: Mitochondrion inner membrane {ECO:0000305}; Multi-pass membrane protein {ECO:0000255|PROSITE-ProRule:PRU00441}.	Mitochondrion
Q9Y6C9	MTCH2_HUMAN	reviewed	Mitochondrial carrier homolog 2 (Met-induced mitochondrial protein)	MTCH2 MIMP HSPC032	Homo sapiens (Human)	303	SUBCELLULAR LOCATION: Mitochondrion inner membrane {ECO:0000305}; Multi-pass membrane protein {ECO:0000305}.	Mitochondrion
P28331	NDUS1_HUMAN	reviewed	NADH-ubiquinone oxidoreductase 75 kDa subunit, mitochondrial (EC 1.6.5.3) (EC 1.6.99.3) (Complex I-75kD) (CI-75kD)	NDUFS1	Homo sapiens (Human)	727	SUBCELLULAR LOCATION: Mitochondrion inner membrane.	Mitochondrion
P22695	QCR2_HUMAN	reviewed	Cytochrome b-c1 complex subunit 2, mitochondrial (Complex III subunit 2) (Core protein II) (Ubiquinol-cytochrome-c reductase complex core protein 2)	UQCRC2	Homo sapiens (Human)	453	SUBCELLULAR LOCATION: Mitochondrion inner membrane; Peripheral membrane protein; Matrix side.	Mitochondrion
P49821	NDUV1_HUMAN	reviewed	NADH dehydrogenase [ubiquinone] flavoprotein 1, mitochondrial (EC 1.6.5.3) (EC 1.6.99.3) (Complex I-51kD) (CI-51kD) (NADH dehydrogenase flavoprotein 1) (NADH-ubiquinone oxidoreductase 51 kDa subunit)	NDUFV1 UQOR1	Homo sapiens (Human)	464	SUBCELLULAR LOCATION: Mitochondrion inner membrane; Peripheral membrane protein; Matrix side.	Mitochondrion
P08574	CY1_HUMAN	reviewed	Cytochrome c1, heme protein, mitochondrial (Complex III subunit 4) (Complex III subunit IV) (Cytochrome b-c1 complex subunit 4) (Ubiquinol-cytochrome-c reductase complex cytochrome c1 subunit) (Cytochrome c-1)	CYC1	Homo sapiens (Human)	325	SUBCELLULAR LOCATION: Mitochondrion inner membrane; Single-pass membrane protein; Intermembrane side.	Mitochondrion
Q10713	MPPA_HUMAN	reviewed	Mitochondrial-processing peptidase subunit alpha (EC 3.4.24.64) (Alpha-MPP) (P-55)	PMPCA INPP5E KIAA0123 MPPA	Homo sapiens (Human)	525	SUBCELLULAR LOCATION: Mitochondrion matrix {ECO:0000250|UniProtKB:P20069}. Mitochondrion inner membrane {ECO:0000269|PubMed:25808372}.	Mitochondrion
Q53H12	AGK_HUMAN	reviewed	Acylglycerol kinase, mitochondrial (hAGK) (EC 2.7.1.107) (EC 2.7.1.94) (Multiple substrate lipid kinase) (HsMuLK) (MuLK) (Multi-substrate lipid kinase)	AGK MULK	Homo sapiens (Human)	422	SUBCELLULAR LOCATION: Mitochondrion membrane {ECO:0000269|PubMed:15939762, ECO:0000269|PubMed:16269826}.	Mitochondrion
P52789	HXK2_HUMAN	reviewed	Hexokinase-2 (EC 2.7.1.1) (Hexokinase type II) (HK II) (Muscle form hexokinase)	HK2	Homo sapiens (Human)	917	SUBCELLULAR LOCATION: Mitochondrion outer membrane {ECO:0000250}. Note=Its hydrophobic N-terminal sequence may be involved in membrane binding. {ECO:0000250}.	Mitochondrion
O94826	TOM70_HUMAN	reviewed	Mitochondrial import receptor subunit TOM70 (Mitochondrial precursor proteins import receptor) (Translocase of outer membrane 70 kDa subunit) (Translocase of outer mitochondrial membrane protein 70)	TOMM70 KIAA0719 TOM70 TOMM70A	Homo sapiens (Human)	608	SUBCELLULAR LOCATION: Mitochondrion outer membrane {ECO:0000250}; Single-pass membrane protein {ECO:0000250}.	Mitochondrion
P50416	CPT1A_HUMAN	reviewed	Carnitine O-palmitoyltransferase 1, liver isoform (CPT1-L) (EC 2.3.1.21) (Carnitine O-palmitoyltransferase I, liver isoform) (CPT I) (CPTI-L) (Carnitine palmitoyltransferase 1A)	CPT1A CPT1	Homo sapiens (Human)	773	SUBCELLULAR LOCATION: Mitochondrion outer membrane {ECO:0000269|PubMed:11350182, ECO:0000269|PubMed:14517221}; Multi-pass membrane protein {ECO:0000269|PubMed:11350182, ECO:0000269|PubMed:14517221}.	Mitochondrion
O96008	TOM40_HUMAN	reviewed	Mitochondrial import receptor subunit TOM40 homolog (Protein Haymaker) (Translocase of outer membrane 40 kDa subunit homolog) (p38.5)	TOMM40 C19orf1 PEREC1 TOM40	Homo sapiens (Human)	361	SUBCELLULAR LOCATION: Mitochondrion outer membrane {ECO:0000269|PubMed:15644312}; Multi-pass membrane protein {ECO:0000255}.	Mitochondrion
H0YKH6	H0YKH6_HUMAN	unreviewed	Ceramide synthase 2 (Fragment)	CERS2	Homo sapiens (Human)	222	SUBCELLULAR LOCATION: Nucleus {ECO:0000256|PROSITE-ProRule:PRU00108, ECO:0000256|RuleBase:RU000682}.	Nucleus
Q5SZE2	Q5SZE2_HUMAN	unreviewed	Ceramide synthase 2 (Fragment)	CERS2	Homo sapiens (Human)	128	SUBCELLULAR LOCATION: Nucleus {ECO:0000256|PROSITE-ProRule:PRU00108, ECO:0000256|RuleBase:RU000682}.	Nucleus
Q5SZE3	Q5SZE3_HUMAN	unreviewed	Ceramide synthase 2 (Fragment)	CERS2	Homo sapiens (Human)	192	SUBCELLULAR LOCATION: Nucleus {ECO:0000256|PROSITE-ProRule:PRU00108, ECO:0000256|RuleBase:RU000682}.	Nucleus
Q5SZE4	Q5SZE4_HUMAN	unreviewed	Ceramide synthase 2 (Fragment)	CERS2	Homo sapiens (Human)	249	SUBCELLULAR LOCATION: Nucleus {ECO:0000256|PROSITE-ProRule:PRU00108, ECO:0000256|RuleBase:RU000682}.	Nucleus
Q14739	LBR_HUMAN	reviewed	Lamin-B receptor (Integral nuclear envelope inner membrane protein) (LMN2R)	LBR	Homo sapiens (Human)	615	SUBCELLULAR LOCATION: Nucleus inner membrane; Multi-pass membrane protein.	Nucleus
Q8N1F7	NUP93_HUMAN	reviewed	Nuclear pore complex protein Nup93 (93 kDa nucleoporin) (Nucleoporin Nup93)	NUP93 KIAA0095	Homo sapiens (Human)	819	SUBCELLULAR LOCATION: Nucleus membrane {ECO:0000250|UniProtKB:Q66HC5}; Peripheral membrane protein {ECO:0000250|UniProtKB:Q66HC5}. Nucleus, nuclear pore complex {ECO:0000269|PubMed:12802065, ECO:0000269|PubMed:15229283}. Nucleus envelope {ECO:0000269|PubMed:26878725}. Note=Localizes at the nuclear basket and at or near the nuclear entry to the gated channel of the pore.	Nucleus
P52948	NUP98_HUMAN	reviewed	Nuclear pore complex protein Nup98-Nup96 (EC 3.4.21.-) [Cleaved into: Nuclear pore complex protein Nup98 (98 kDa nucleoporin) (Nucleoporin Nup98) (Nup98); Nuclear pore complex protein Nup96 (96 kDa nucleoporin) (Nucleoporin Nup96) (Nup96)]	NUP98 ADAR2	Homo sapiens (Human)	1817	SUBCELLULAR LOCATION: Nucleus membrane {ECO:0000269|PubMed:10087256, ECO:0000269|PubMed:11839768, ECO:0000269|PubMed:12191480, ECO:0000269|PubMed:12802065, ECO:0000269|PubMed:15229283, ECO:0000269|PubMed:20407419}; Peripheral membrane protein; Nucleoplasmic side {ECO:0000269|PubMed:11839768}. Nucleus, nuclear pore complex {ECO:0000269|PubMed:11839768, ECO:0000269|PubMed:12802065, ECO:0000269|PubM…	Nucleus
A8K897	A8K897_HUMAN	unreviewed	Nuclear pore complex protein Nup93		Homo sapiens (Human)	819	SUBCELLULAR LOCATION: Nucleus, nuclear pore complex {ECO:0000256|RuleBase:RU364035}.	Nucleus
H3BP95	H3BP95_HUMAN	unreviewed	Nuclear pore complex protein Nup93 (Fragment)	NUP93	Homo sapiens (Human)	156	SUBCELLULAR LOCATION: Nucleus, nuclear pore complex {ECO:0000256|RuleBase:RU364035}.	Nucleus
H3BPA9	H3BPA9_HUMAN	unreviewed	Nuclear pore complex protein Nup93 (Fragment)	NUP93	Homo sapiens (Human)	229	SUBCELLULAR LOCATION: Nucleus, nuclear pore complex {ECO:0000256|RuleBase:RU364035}.	Nucleus
H3BRD9	H3BRD9_HUMAN	unreviewed	Nuclear pore complex protein Nup93 (Fragment)	NUP93	Homo sapiens (Human)	140	SUBCELLULAR LOCATION: Nucleus, nuclear pore complex {ECO:0000256|RuleBase:RU364035}.	Nucleus
H3BV15	H3BV15_HUMAN	unreviewed	Nuclear pore complex protein Nup93 (Fragment)	NUP93	Homo sapiens (Human)	84	SUBCELLULAR LOCATION: Nucleus, nuclear pore complex {ECO:0000256|RuleBase:RU364035}.	Nucleus
H3BVE2	H3BVE2_HUMAN	unreviewed	Nuclear pore complex protein Nup93 (Fragment)	NUP93	Homo sapiens (Human)	117	SUBCELLULAR LOCATION: Nucleus, nuclear pore complex {ECO:0000256|RuleBase:RU364035}.	Nucleus
H3BVG0	H3BVG0_HUMAN	unreviewed	Nuclear pore complex protein Nup93	NUP93	Homo sapiens (Human)	880	SUBCELLULAR LOCATION: Nucleus, nuclear pore complex {ECO:0000256|RuleBase:RU364035}.	Nucleus
Q9UKX7	NUP50_HUMAN	reviewed	Nuclear pore complex protein Nup50 (50 kDa nucleoporin) (Nuclear pore-associated protein 60 kDa-like) (Nucleoporin Nup50)	NUP50 NPAP60L PRO1146	Homo sapiens (Human)	468	SUBCELLULAR LOCATION: Nucleus, nuclear pore complex {ECO:0000269|PubMed:12802065}. Nucleus membrane {ECO:0000250|UniProtKB:O08587}; Peripheral membrane protein {ECO:0000250|UniProtKB:O08587}; Nucleoplasmic side {ECO:0000250|UniProtKB:O08587}. Note=Localizes to the nucleoplasmic fibrils of the nuclear pore complex (By similarity). Dissociates from the NPC structure early during prophase of mitosis…	Nucleus
Q5JTH9	RRP12_HUMAN	reviewed	RRP12-like protein	RRP12 KIAA0690	Homo sapiens (Human)	1297	SUBCELLULAR LOCATION: Nucleus, nucleolus {ECO:0000269|PubMed:12429849}. Nucleus membrane {ECO:0000305}; Single-pass membrane protein {ECO:0000305}.	Nucleus
P49790	NU153_HUMAN	reviewed	Nuclear pore complex protein Nup153 (153 kDa nucleoporin) (Nucleoporin Nup153)	NUP153	Homo sapiens (Human)	1475	SUBCELLULAR LOCATION: Nucleus. Nucleus membrane. Nucleus, nuclear pore complex. Note=Tightly associated with the nuclear membrane and lamina (By similarity). Localized to the nucleoplasmic side of the nuclear pore complex (NPC) core structure, forming a fibrous structure called the nuclear basket. Dissociates from the NPC structure early during prophase of mitosis. Integrated in the newly assembl…	Nucleus
O15228	GNPAT_HUMAN	reviewed	Dihydroxyacetone phosphate acyltransferase (DAP-AT) (DHAP-AT) (EC 2.3.1.42) (Acyl-CoA:dihydroxyacetonephosphateacyltransferase) (Glycerone-phosphate O-acyltransferase)	GNPAT DAPAT DHAPAT	Homo sapiens (Human)	680	SUBCELLULAR LOCATION: Peroxisome membrane {ECO:0000250}; Peripheral membrane protein {ECO:0000250}; Matrix side {ECO:0000250}. Note=Exclusively localized to the lumenal side of the peroxisomal membrane. {ECO:0000250}.	Peroxisome
B2RAG5	B2RAG5_HUMAN	unreviewed	Dihydroxyacetone phosphate acyltransferase (DAP-AT) (DHAP-AT) (EC 2.3.1.42)		Homo sapiens (Human)	680	SUBCELLULAR LOCATION: Peroxisome membrane {ECO:0000256|PIRNR:PIRNR000437}; Peripheral membrane protein {ECO:0000256|PIRNR:PIRNR000437}; Matrix side {ECO:0000256|PIRNR:PIRNR000437}.	Peroxisome
P28288	ABCD3_HUMAN	reviewed	ATP-binding cassette sub-family D member 3 (70 kDa peroxisomal membrane protein) (PMP70)	ABCD3 PMP70 PXMP1	Homo sapiens (Human)	659	SUBCELLULAR LOCATION: Peroxisome membrane {ECO:0000269|PubMed:10704444}; Multi-pass membrane protein {ECO:0000255|PROSITE-ProRule:PRU00441, ECO:0000269|PubMed:10704444}.	Peroxisome
Q8WVX9	FACR1_HUMAN	reviewed	Fatty acyl-CoA reductase 1 (EC 1.2.1.84) (Male sterility domain-containing protein 2)	FAR1 MLSTD2 UNQ2423/PRO4981	Homo sapiens (Human)	515	SUBCELLULAR LOCATION: Peroxisome membrane {ECO:0000269|PubMed:24108123}; Single-pass membrane protein {ECO:0000269|PubMed:24108123}.	Peroxisome
O00116	ADAS_HUMAN	reviewed	Alkyldihydroxyacetonephosphate synthase, peroxisomal (Alkyl-DHAP synthase) (EC 2.5.1.26) (Aging-associated gene 5 protein) (Alkylglycerone-phosphate synthase)	AGPS AAG5	Homo sapiens (Human)	658	SUBCELLULAR LOCATION: Peroxisome membrane. Note=Localized to the inner aspect of the peroxisomal membrane.	Peroxisome
A0A024QYR3	A0A024QYR3_HUMAN	unreviewed	Transmembrane 9 superfamily member		Homo sapiens (Human)	642		Membrane
A0A024QYR8	A0A024QYR8_HUMAN	unreviewed	Transmembrane 9 superfamily member	TM9SF2 hCG_27750	Homo sapiens (Human)	663		Membrane
A0A024QYW3	A0A024QYW3_HUMAN	unreviewed	Proteolipid protein 2 (Colonic epithelium-enriched), isoform CRA_a	PLP2 hCG_19828	Homo sapiens (Human)	152		Membrane
A0A024QZ14	A0A024QZ14_HUMAN	unreviewed	Phosphatidylinositol glycan, class S, isoform CRA_b	PIGS hCG_2039635	Homo sapiens (Human)	277		Membrane
A0A024R095	A0A024R095_HUMAN	unreviewed	Chloride channel CLIC-like 1, isoform CRA_a	CLCC1 hCG_39926	Homo sapiens (Human)	501		Membrane
A0A024R0C3	A0A024R0C3_HUMAN	unreviewed	Nicotinamide nucleotide transhydrogenase, isoform CRA_a	NNT hCG_17428	Homo sapiens (Human)	1086		Membrane
A0A024R0G0	A0A024R0G0_HUMAN	unreviewed	Chloride channel CLIC-like 1, isoform CRA_b	CLCC1 hCG_39926	Homo sapiens (Human)	551		Membrane
A0A024R0Q4	A0A024R0Q4_HUMAN	unreviewed	Phospholipase D family, member 3, isoform CRA_b	PLD3 hCG_1995506	Homo sapiens (Human)	490		Membrane
A0A024R0W3	A0A024R0W3_HUMAN	unreviewed	Solute carrier family 38, member 2, isoform CRA_b	SLC38A2 hCG_39510	Homo sapiens (Human)	506		Membrane
A0A024R124	A0A024R124_HUMAN	unreviewed	Solute carrier family 38, member 1, isoform CRA_a	SLC38A1 hCG_39512	Homo sapiens (Human)	487		Membrane
A0A024R3R5	A0A024R3R5_HUMAN	unreviewed	Lamin B receptor, isoform CRA_a	LBR hCG_32785	Homo sapiens (Human)	615		Membrane
A0A024R497	A0A024R497_HUMAN	unreviewed	Acyl-CoA synthetase long-chain family member 3, isoform CRA_a	ACSL3 hCG_21017	Homo sapiens (Human)	720		Membrane
A0A024R5F7	A0A024R5F7_HUMAN	unreviewed	7-dehydrocholesterol reductase isoform 1 (7-dehydrocholesterol reductase, isoform CRA_a)	DHCR7 hCG_2017142	Homo sapiens (Human)	475		Membrane
A0A024R7D5	A0A024R7D5_HUMAN	unreviewed	Low density lipoprotein receptor (Familial hypercholesterolemia), isoform CRA_b	LDLR hCG_29965	Homo sapiens (Human)	860		Membrane
A0A024RAB0	A0A024RAB0_HUMAN	unreviewed	Endothelin converting enzyme 1, isoform CRA_a	ECE1 hCG_38869	Homo sapiens (Human)	758		Membrane
A0A024RAB2	A0A024RAB2_HUMAN	unreviewed	Endothelin converting enzyme 1, isoform CRA_c	ECE1 hCG_38869	Homo sapiens (Human)	767		Membrane
A0A024RAF7	A0A024RAF7_HUMAN	unreviewed	Endothelin converting enzyme 1, isoform CRA_b	ECE1 hCG_38869	Homo sapiens (Human)	770		Membrane
A0A024RB16	A0A024RB16_HUMAN	unreviewed	Family with sequence similarity 62 (C2 domain containing), member A, isoform CRA_a	FAM62A hCG_25002	Homo sapiens (Human)	1114		Membrane
A0A024RBH2	A0A024RBH2_HUMAN	unreviewed	Cytoskeleton-associated protein 4, isoform CRA_c	CKAP4 hCG_16102	Homo sapiens (Human)	602		Membrane
A0A024RBS4	A0A024RBS4_HUMAN	unreviewed	Scavenger receptor class B, member 1, isoform CRA_b	SCARB1 hCG_25301	Homo sapiens (Human)	509		Membrane
A0A075B6F6	A0A075B6F6_HUMAN	unreviewed	Minor histocompatibility antigen H13 (Fragment)	HM13	Homo sapiens (Human)	272		Membrane
A0A075MGT0	A0A075MGT0_HUMAN	unreviewed	HLA class I antigen (MHC class I antigen)	HLA-B	Homo sapiens (Human)	362		Membrane
A0A076FQ79	A0A076FQ79_HUMAN	unreviewed	MHC class I antigen	HLA-C	Homo sapiens (Human)	366		Membrane
A0A087WU53	A0A087WU53_HUMAN	unreviewed	Magnesium transporter protein 1	MAGT1	Homo sapiens (Human)	367		Membrane
A0A087WUV8	A0A087WUV8_HUMAN	unreviewed	Basigin	BSG	Homo sapiens (Human)	189		Membrane
A0A087WW58	A0A087WW58_HUMAN	unreviewed	Ethanolaminephosphotransferase 1	SELENOI	Homo sapiens (Human)	396		Membrane
A0A087WW65	A0A087WW65_HUMAN	unreviewed	ATP-binding cassette sub-family B member 7, mitochondrial	ABCB7	Homo sapiens (Human)	713		Membrane
A0A087WXU3	A0A087WXU3_HUMAN	unreviewed	Extended synaptotagmin-2	ESYT2	Homo sapiens (Human)	921		Membrane
A0A087X090	A0A087X090_HUMAN	unreviewed	Farnesyl diphosphate synthase (Farnesyl pyrophosphate synthetase, dimethylallyltranstransferase, geranyltranstransferase), isoform CRA_a (Farnesyl pyrophosphate synthase)	FDPS hCG_1997329	Homo sapiens (Human)	248		Membrane
A0A087X1I6	A0A087X1I6_HUMAN	unreviewed	Sodium-coupled neutral amino acid transporter 5	SLC38A5	Homo sapiens (Human)	403		Membrane
A0A090KEX7	A0A090KEX7_HUMAN	unreviewed	MHC class I antigen	HLA-A	Homo sapiens (Human)	365		Membrane
A0A090KF41	A0A090KF41_HUMAN	unreviewed	HLA class I antigen	HLA-B	Homo sapiens (Human)	362		Membrane
A0A090KFY5	A0A090KFY5_HUMAN	unreviewed	HLA class I antigen (MHC class I antigen)	HLA-C	Homo sapiens (Human)	366		Membrane
A0A090KMD4	A0A090KMD4_HUMAN	unreviewed	HLA class I antigen (MHC class I antigen)	HLA-C	Homo sapiens (Human)	366		Membrane
A0A0A0MS99	A0A0A0MS99_HUMAN	unreviewed	Multidrug resistance-associated protein 1	ABCC1	Homo sapiens (Human)	1215		Membrane
A0A0A0MTI6	A0A0A0MTI6_HUMAN	unreviewed	Elongation of very long chain fatty acids protein (EC 2.3.1.199) (Very-long-chain 3-oxoacyl-CoA synthase)	ELOVL5 hCG_2001424	Homo sapiens (Human)	262		Membrane
A0A0A0MTJ9	A0A0A0MTJ9_HUMAN	unreviewed	Neutral cholesterol ester hydrolase 1	NCEH1	Homo sapiens (Human)	448		Membrane
A0A0B7NNI9	A0A0B7NNI9_HUMAN	unreviewed	MHC class I antigen	HLA-C	Homo sapiens (Human)	366		Membrane
A0A0B7NXV1	A0A0B7NXV1_HUMAN	unreviewed	MHC class I antigen	HLA-C	Homo sapiens (Human)	366		Membrane
A0A0B7NXX4	A0A0B7NXX4_HUMAN	unreviewed	MHC class I antigen	HLA-C	Homo sapiens (Human)	366		Membrane
A0A0B7NY81	A0A0B7NY81_HUMAN	unreviewed	MHC class I antigen	HLA-C	Homo sapiens (Human)	366		Membrane
A0A0B7NY86	A0A0B7NY86_HUMAN	unreviewed	MHC class I antigen	HLA-C	Homo sapiens (Human)	366		Membrane
A0A0B7NY93	A0A0B7NY93_HUMAN	unreviewed	MHC class I antigen	HLA-C	Homo sapiens (Human)	366		Membrane
A0A0C4DFL7	A0A0C4DFL7_HUMAN	unreviewed	Lanosterol 14-alpha demethylase	CYP51A1	Homo sapiens (Human)	509		Membrane
A0A0C4DFM1	A0A0C4DFM1_HUMAN	unreviewed	Transmembrane 9 superfamily member	TM9SF4 hCG_38809	Homo sapiens (Human)	625		Membrane
A0A0C4DG40	A0A0C4DG40_HUMAN	unreviewed	Nesprin-1	SYNE1	Homo sapiens (Human)	8749		Membrane
A0A0C4DGP7	A0A0C4DGP7_HUMAN	unreviewed	Nicalin (Fragment)	NCLN	Homo sapiens (Human)	350		Membrane
A0A0C4DGU3	A0A0C4DGU3_HUMAN	unreviewed	Minor histocompatibility antigen H13	HM13	Homo sapiens (Human)	143		Membrane
A0A0C4DGZ6	A0A0C4DGZ6_HUMAN	unreviewed	Ribonucleoside-diphosphate reductase subunit M2 B	RRM2B	Homo sapiens (Human)	297		Membrane
A0A0G2JH50	A0A0G2JH50_HUMAN	unreviewed	HLA class I histocompatibility antigen, Cw-6 alpha chain	HLA-C	Homo sapiens (Human)	372		Membrane
A0A0G2JIF0	A0A0G2JIF0_HUMAN	unreviewed	HLA class I histocompatibility antigen, Cw-6 alpha chain	HLA-C	Homo sapiens (Human)	368		Membrane
A0A0G2JNX6	A0A0G2JNX6_HUMAN	unreviewed	Lysophospholipid acyltransferase 7 (Fragment)	MBOAT7	Homo sapiens (Human)	172		Membrane
A0A0G2JQM1	A0A0G2JQM1_HUMAN	unreviewed	AP-2 complex subunit alpha-2 (Fragment)	AP2A2	Homo sapiens (Human)	634		Membrane
A0A0J9YXF2	A0A0J9YXF2_HUMAN	unreviewed	Paraoxonase 2, isoform CRA_a (Serum paraoxonase/arylesterase 2)	PON2 hCG_1640820	Homo sapiens (Human)	375		Membrane
A0A0K8K5V0	A0A0K8K5V0_HUMAN	unreviewed	MHC class I antigen	HLA-C	Homo sapiens (Human)	366		Membrane
A0A0R4J2G3	A0A0R4J2G3_HUMAN	unreviewed	Arylacetamide deacetylase-like 1 (Neutral cholesterol ester hydrolase 1)	NCEH1 AADACL1 hCG_20251	Homo sapiens (Human)	440		Membrane
A0A0S2C6M1	A0A0S2C6M1_HUMAN	unreviewed	Equilibrative nucleoside transporter 1 variant ata (Fragment)	SLC29A1	Homo sapiens (Human)	67		Membrane
A0A0S2ILF3	A0A0S2ILF3_HUMAN	unreviewed	MHC class I antigen	HLA-B	Homo sapiens (Human)	362		Membrane
A0A0S2Z2W5	A0A0S2Z2W5_HUMAN	unreviewed	ATP-binding cassette sub-family B member 7 isoform 3	ABCB7	Homo sapiens (Human)	498		Membrane
A0A0S2Z2Z3	A0A0S2Z2Z3_HUMAN	unreviewed	ATP-binding cassette sub-family B member 7 isoform 1 (ATP-binding cassette, sub-family B (MDR/TAP), member 7, isoform CRA_e) (Fragment)	ABCB7 hCG_19369	Homo sapiens (Human)	753		Membrane
A0A0S2Z3H6	A0A0S2Z3H6_HUMAN	unreviewed	Cleft lip and palate associated transmembrane protein 1 isoform 1 (Fragment)	CLPTM1	Homo sapiens (Human)	686		Membrane
A0A0S2Z3N2	A0A0S2Z3N2_HUMAN	unreviewed	Scavenger receptor class B member 1 isoform 1 (Fragment)	SCARB1	Homo sapiens (Human)	552		Membrane
A0A0S2Z3S3	A0A0S2Z3S3_HUMAN	unreviewed	7-dehydrocholesterol reductase isoform 2	DHCR7	Homo sapiens (Human)	263		Membrane
A0A0S2Z518	A0A0S2Z518_HUMAN	unreviewed	SEC63-like protein isoform 2 (Fragment)	SEC63	Homo sapiens (Human)	323		Membrane
A0A0S2Z534	A0A0S2Z534_HUMAN	unreviewed	Solute carrier family 39 (Zinc transporter), member 14, isoform CRA_a (Solute carrier family 39 member 14 isoform 1) (Fragment)	SLC39A14 hCG_15998	Homo sapiens (Human)	481		Membrane
A0A0S2Z5A2	A0A0S2Z5A2_HUMAN	unreviewed	Atlastin GTPase 1 isoform 2 (Fragment)	ATL1	Homo sapiens (Human)	553		Membrane
A0A0S2Z5B1	A0A0S2Z5B1_HUMAN	unreviewed	Solute carrier family 39 member 14 isoform 2	SLC39A14	Homo sapiens (Human)	458		Membrane
A0A0S2Z5C8	A0A0S2Z5C8_HUMAN	unreviewed	Solute carrier family 39 member 14 isoform 4	SLC39A14	Homo sapiens (Human)	418		Membrane
A0A0S2Z5M1	A0A0S2Z5M1_HUMAN	unreviewed	SEC63-like (S. cerevisiae) (SEC63-like protein isoform 1) (Fragment)	SEC63 hCG_34021	Homo sapiens (Human)	760		Membrane
A0A0S2Z5N2	A0A0S2Z5N2_HUMAN	unreviewed	Transmembrane protein 43 isoform 2	TMEM43	Homo sapiens (Human)	269		Membrane
A0A0S2Z5Z7	A0A0S2Z5Z7_HUMAN	unreviewed	Solute carrier family 39 member 14 isoform 3 (Fragment)	SLC39A14	Homo sapiens (Human)	481		Membrane
A0A0S2Z6F0	A0A0S2Z6F0_HUMAN	unreviewed	Histocompatibility 13 isoform 2	HM13	Homo sapiens (Human)	345		Membrane
A0A0S2Z6I4	A0A0S2Z6I4_HUMAN	unreviewed	Vitamin K epoxide reductase complex subunit 1 isoform 1 (Fragment)	VKORC1	Homo sapiens (Human)	163		Membrane
A0A0S4T197	A0A0S4T197_HUMAN	unreviewed	MHC class I antigen	HLA-C	Homo sapiens (Human)	366		Membrane
A0A0S4T1E3	A0A0S4T1E3_HUMAN	unreviewed	MHC class I antigen	HLA-C	Homo sapiens (Human)	366		Membrane
A0A0S4T1S1	A0A0S4T1S1_HUMAN	unreviewed	MHC class I antigen	HLA-C	Homo sapiens (Human)	366		Membrane
A0A0S4T219	A0A0S4T219_HUMAN	unreviewed	MHC class I antigen	HLA-C	Homo sapiens (Human)	366		Membrane
A0A0S4T2A5	A0A0S4T2A5_HUMAN	unreviewed	MHC class I antigen	HLA-C	Homo sapiens (Human)	366		Membrane
A0A0S4T2C9	A0A0S4T2C9_HUMAN	unreviewed	MHC class I antigen	HLA-C	Homo sapiens (Human)	366		Membrane
A0A0S4T2L8	A0A0S4T2L8_HUMAN	unreviewed	MHC class I antigen	HLA-C	Homo sapiens (Human)	366		Membrane
A0A0S4T2Z1	A0A0S4T2Z1_HUMAN	unreviewed	MHC class I antigen	HLA-C	Homo sapiens (Human)	366		Membrane
A0A0S4T3F5	A0A0S4T3F5_HUMAN	unreviewed	MHC class I antigen	HLA-C	Homo sapiens (Human)	366		Membrane
A0A0S4T3G2	A0A0S4T3G2_HUMAN	unreviewed	MHC class I antigen	HLA-C	Homo sapiens (Human)	366		Membrane
A0A0S4T3H1	A0A0S4T3H1_HUMAN	unreviewed	MHC class I antigen	HLA-C	Homo sapiens (Human)	366		Membrane
A0A0S4T3I7	A0A0S4T3I7_HUMAN	unreviewed	MHC class I antigen	HLA-C	Homo sapiens (Human)	366		Membrane
A0A0S4T3R3	A0A0S4T3R3_HUMAN	unreviewed	MHC class I antigen	HLA-C	Homo sapiens (Human)	366		Membrane
A0A0S4T3Y5	A0A0S4T3Y5_HUMAN	unreviewed	MHC class I antigen	HLA-C	Homo sapiens (Human)	366		Membrane
A0A0S4T3Y6	A0A0S4T3Y6_HUMAN	unreviewed	MHC class I antigen	HLA-C	Homo sapiens (Human)	366		Membrane
A0A0S4T400	A0A0S4T400_HUMAN	unreviewed	MHC class I antigen	HLA-C	Homo sapiens (Human)	366		Membrane
A0A0S4T432	A0A0S4T432_HUMAN	unreviewed	MHC class I antigen	HLA-C	Homo sapiens (Human)	366		Membrane
A0A0S4T476	A0A0S4T476_HUMAN	unreviewed	MHC class I antigen	HLA-C	Homo sapiens (Human)	366		Membrane
A0A0S4T4D4	A0A0S4T4D4_HUMAN	unreviewed	MHC class I antigen	HLA-C	Homo sapiens (Human)	366		Membrane
A0A0S4T4M2	A0A0S4T4M2_HUMAN	unreviewed	MHC class I antigen	HLA-C	Homo sapiens (Human)	366		Membrane
A0A0S4T4W1	A0A0S4T4W1_HUMAN	unreviewed	MHC class I antigen	HLA-C	Homo sapiens (Human)	366		Membrane
A0A0S4XR60	A0A0S4XR60_HUMAN	unreviewed	MHC class I antigen	HLA-A	Homo sapiens (Human)	365		Membrane
A0A0U2VW74	A0A0U2VW74_HUMAN	unreviewed	MHC class I antigen	HLA-B	Homo sapiens (Human)	362		Membrane
A0A0U2X5S9	A0A0U2X5S9_HUMAN	unreviewed	MHC class I antigen	HLA-B	Homo sapiens (Human)	362		Membrane
A0A0U5IHU5	A0A0U5IHU5_HUMAN	unreviewed	MHC class I antigen	HLA-C	Homo sapiens (Human)	366		Membrane
A0A0U5KJ72	A0A0U5KJ72_HUMAN	unreviewed	MHC class I antigen	HLA-C	Homo sapiens (Human)	366		Membrane
A0A0U5KKC2	A0A0U5KKC2_HUMAN	unreviewed	MHC class I antigen	HLA-C	Homo sapiens (Human)	366		Membrane
A0A0U5PXQ4	A0A0U5PXQ4_HUMAN	unreviewed	MHC class I antigen	HLA-A	Homo sapiens (Human)	365		Membrane
A0A0U5PZB5	A0A0U5PZB5_HUMAN	unreviewed	MHC class I antigen	HLA-C	Homo sapiens (Human)	366		Membrane
A0A0U5Q0D3	A0A0U5Q0D3_HUMAN	unreviewed	MHC class I antigen	HLA-C	Homo sapiens (Human)	366		Membrane
A0A0U5Q0E7	A0A0U5Q0E7_HUMAN	unreviewed	MHC class I antigen	HLA-C	Homo sapiens (Human)	366		Membrane
A0A0U5Q1S9	A0A0U5Q1S9_HUMAN	unreviewed	MHC class I antigen	HLA-C	Homo sapiens (Human)	366		Membrane
A0A0U5Q1X6	A0A0U5Q1X6_HUMAN	unreviewed	MHC class I antigen	HLA-C	Homo sapiens (Human)	366		Membrane
A0A0U5QLP3	A0A0U5QLP3_HUMAN	unreviewed	MHC class I antigen	HLA-A	Homo sapiens (Human)	365		Membrane
A0A0U5QLQ5	A0A0U5QLQ5_HUMAN	unreviewed	MHC class I antigen	HLA-A	Homo sapiens (Human)	365		Membrane
A0A140HM92	A0A140HM92_HUMAN	unreviewed	MHC class I antigen	HLA-C	Homo sapiens (Human)	366		Membrane
A0A140T9B3	A0A140T9B3_HUMAN	unreviewed	HLA class I histocompatibility antigen, Cw-6 alpha chain	HLA-C	Homo sapiens (Human)	397		Membrane
A0A140T9Z6	A0A140T9Z6_HUMAN	unreviewed	HLA class I histocompatibility antigen, A-3 alpha chain	HLA-A	Homo sapiens (Human)	342		Membrane
A0A141MJG8	A0A141MJG8_HUMAN	unreviewed	MHC class I antigen	HLA-B	Homo sapiens (Human)	362		Membrane
A0A142J2H5	A0A142J2H5_HUMAN	unreviewed	MHC class I antigen (Fragment)	HLA-A	Homo sapiens (Human)	364		Membrane
A0A142JA41	A0A142JA41_HUMAN	unreviewed	MHC class I antigen	HLA-C	Homo sapiens (Human)	366		Membrane
A0A173AD10	A0A173AD10_HUMAN	unreviewed	MHC class I antigen	HLA-C	Homo sapiens (Human)	366		Membrane
A0A173AD40	A0A173AD40_HUMAN	unreviewed	MHC class I antigen	HLA-C	Homo sapiens (Human)	366		Membrane
A0A173AD42	A0A173AD42_HUMAN	unreviewed	MHC class I antigen	HLA-C	Homo sapiens (Human)	366		Membrane
A0A1B0GV93	A0A1B0GV93_HUMAN	unreviewed	Very-long-chain 3-oxoacyl-CoA reductase	HSD17B12	Homo sapiens (Human)	276		Membrane
A0A1C3PHN1	A0A1C3PHN1_HUMAN	unreviewed	MHC class I antigen	HLA-C	Homo sapiens (Human)	366		Membrane
A0A1C3PHQ2	A0A1C3PHQ2_HUMAN	unreviewed	MHC class I antigen	HLA-C	Homo sapiens (Human)	366		Membrane
A0A1C3PHS6	A0A1C3PHS6_HUMAN	unreviewed	MHC class I antigen	HLA-C	Homo sapiens (Human)	366		Membrane
A0A1D8MAL9	A0A1D8MAL9_HUMAN	unreviewed	MHC class I antigen	HLA-C HLA C	Homo sapiens (Human)	366		Membrane
A0A1G4HPR8	A0A1G4HPR8_HUMAN	unreviewed	MHC class I antigen	HLA-B	Homo sapiens (Human)	362		Membrane
A0A1L5LC14	A0A1L5LC14_HUMAN	unreviewed	MHC class I antigen	HLA-C	Homo sapiens (Human)	366		Membrane
A2BF26	A2BF26_HUMAN	unreviewed	HLA class I histocompatibility antigen, Cw-6 alpha chain	HLA-C	Homo sapiens (Human)	397		Membrane
A3KMG5	A3KMG5_HUMAN	unreviewed	KIAA0406 protein (Fragment)	KIAA0406	Homo sapiens (Human)	228		Membrane
A4FRG0	A4FRG0_HUMAN	unreviewed	MHC class I antigen	HLA-B	Homo sapiens (Human)	362		Membrane
A8K032	A8K032_HUMAN	unreviewed	Translocating chain-associated membrane protein		Homo sapiens (Human)	374		Membrane
A8K0D2	A8K0D2_HUMAN	unreviewed	cDNA FLJ77740, highly similar to Homo sapiens 7-dehydrocholesterol reductase, mRNA		Homo sapiens (Human)	475		Membrane
A8K0M6	A8K0M6_HUMAN	unreviewed	cDNA FLJ76697		Homo sapiens (Human)	555		Membrane
A8K285	A8K285_HUMAN	unreviewed	cDNA FLJ78239		Homo sapiens (Human)	555		Membrane
A8K2T7	A8K2T7_HUMAN	unreviewed	Receptor protein-tyrosine kinase (EC 2.7.10.1)		Homo sapiens (Human)	1210		Membrane
A8K309	A8K309_HUMAN	unreviewed	cDNA FLJ76654, highly similar to Homo sapiens CD44 antigen (homing function and Indian blood group system) (CD44), transcript variant 4, mRNA		Homo sapiens (Human)	361		Membrane
A8K369	A8K369_HUMAN	unreviewed	cDNA FLJ76707, highly similar to Homo sapiens transmembrane protein 87A, mRNA		Homo sapiens (Human)	494		Membrane
A8K6H9	A8K6H9_HUMAN	unreviewed	cDNA FLJ75876, highly similar to Homo sapiens solute carrier family 38, member 2 (SLC38A2), mRNA		Homo sapiens (Human)	506		Membrane
A8K7T4	A8K7T4_HUMAN	unreviewed	cDNA FLJ75774, highly similar to Homo sapiens lectin, mannose-binding 2 (LMAN2), mRNA		Homo sapiens (Human)	356		Membrane
A8KAH1	A8KAH1_HUMAN	unreviewed	cDNA FLJ75839, highly similar to Homo sapiens phosphatidylserine synthase 1 (PTDSS1), mRNA		Homo sapiens (Human)	473		Membrane
A9C4B8	A9C4B8_HUMAN	unreviewed	Lysophospholipid acyltransferase 7 (Fragment)	MBOAT7	Homo sapiens (Human)	256		Membrane
A9CB80	A9CB80_HUMAN	unreviewed	Receptor protein-tyrosine kinase (EC 2.7.10.1)		Homo sapiens (Human)	1210		Membrane
B1APM4	B1APM4_HUMAN	unreviewed	Sterol O-acyltransferase 1 (Fragment)	SOAT1	Homo sapiens (Human)	260		Membrane
B2R6A5	B2R6A5_HUMAN	unreviewed	cDNA, FLJ92862, highly similar to Homo sapiens solute carrier family 16 (monocarboxylic acid transporters), member 1 (SLC16A1), mRNA		Homo sapiens (Human)	500		Membrane
B2RA56	B2RA56_HUMAN	unreviewed	Nicalin		Homo sapiens (Human)	552		Membrane
B2RAK1	B2RAK1_HUMAN	unreviewed	Aminopeptidase (EC 3.4.11.-)		Homo sapiens (Human)	1025		Membrane
B2RAQ8	B2RAQ8_HUMAN	unreviewed	cDNA, FLJ95058, highly similar to Homo sapiens carnitine palmitoyltransferase 1A (liver) (CPT1A),nuclear gene encoding mitochondrial protein, mRNA		Homo sapiens (Human)	773		Membrane
B2RBB2	B2RBB2_HUMAN	unreviewed	cDNA, FLJ95416, highly similar to Homo sapiens phosphatidylinositol glycan, class S (PIGS), mRNA		Homo sapiens (Human)	555		Membrane
B2RBE0	B2RBE0_HUMAN	unreviewed	cDNA, FLJ95462, highly similar to Homo sapiens fatty-acid-Coenzyme A ligase, long-chain 3 (FACL3),mRNA		Homo sapiens (Human)	720		Membrane
B2RDG1	B2RDG1_HUMAN	unreviewed	Fatty acyl-CoA reductase (EC 1.2.1.84)		Homo sapiens (Human)	515		Membrane
B3KM97	B3KM97_HUMAN	unreviewed	cDNA FLJ10554 fis, clone NT2RP2002385, highly similar to Synaptic glycoprotein SC2		Homo sapiens (Human)	308		Membrane
B3KM98	B3KM98_HUMAN	unreviewed	cDNA FLJ10556 fis, clone NT2RP2002479, highly similar to ATP-binding cassette sub-family B member 7, mitochondrial (Fragment)		Homo sapiens (Human)	723		Membrane
B3KMV5	B3KMV5_HUMAN	unreviewed	cDNA FLJ12728 fis, clone NT2RP2000040, highly similar to Protein FAM62A		Homo sapiens (Human)	1104		Membrane
B3KMV8	B3KMV8_HUMAN	unreviewed	cDNA FLJ12766 fis, clone NT2RP2001520, highly similar to Calcium-binding mitochondrial carrier protein Aralar1		Homo sapiens (Human)	678		Membrane
B3KN05	B3KN05_HUMAN	unreviewed	cDNA FLJ13129 fis, clone NT2RP3002969, highly similar to Long-chain-fatty-acid--CoA ligase 3 (EC 6.2.1.3)		Homo sapiens (Human)	709		Membrane
B3KNA3	B3KNA3_HUMAN	unreviewed	cDNA FLJ14052 fis, clone HEMBA1006914, highly similar to Ubiquitin-like 1-activating enzyme E1B		Homo sapiens (Human)	372		Membrane
B3KNE7	B3KNE7_HUMAN	unreviewed	cDNA FLJ14468 fis, clone MAMMA1000734, highly similar to Translocation protein SEC63 homolog		Homo sapiens (Human)	418		Membrane
B3KQF0	B3KQF0_HUMAN	unreviewed	cDNA FLJ90354 fis, clone NT2RP2003390, highly similar to Translocation protein SEC63 homolog		Homo sapiens (Human)	760		Membrane
B3KQJ0	B3KQJ0_HUMAN	unreviewed	cDNA FLJ90530 fis, clone NT2RP4002187, highly similar to Homo sapiens hydroxysteroid (17-beta) dehydrogenase 12 (HSD17B12), mRNA		Homo sapiens (Human)	312		Membrane
B3KSG9	B3KSG9_HUMAN	unreviewed	Transmembrane 9 superfamily member		Homo sapiens (Human)	573		Membrane
B3KSQ1	B3KSQ1_HUMAN	unreviewed	cDNA FLJ36768 fis, clone ADIPS1000064, highly similar to Synaptic glycoprotein SC2		Homo sapiens (Human)	323		Membrane
B3KVN0	B3KVN0_HUMAN	unreviewed	cDNA FLJ16785 fis, clone NT2RI2015342, highly similar to Solute carrier family 2, facilitated glucose transporter member 1		Homo sapiens (Human)	416		Membrane
B3KW19	B3KW19_HUMAN	unreviewed	cDNA FLJ41911 fis, clone PEBLM2008605, highly similar to Very-long-chain acyl-CoA synthetase (EC 6.2.1.-)		Homo sapiens (Human)	385		Membrane
B3KW46	B3KW46_HUMAN	unreviewed	cDNA FLJ42118 fis, clone TESTI2005610, highly similar to Scavenger receptor class B member 1		Homo sapiens (Human)	512		Membrane
B3KWP3	B3KWP3_HUMAN	unreviewed	cDNA FLJ43503 fis, clone PEBLM2006215, highly similar to Mitochondrial folate transporter/carrier		Homo sapiens (Human)	299		Membrane
B3KXD2	B3KXD2_HUMAN	unreviewed	cDNA FLJ45226 fis, clone BRCAN2020412, highly similar to GPI transamidase component PIG-S		Homo sapiens (Human)	206		Membrane
B3KY56	B3KY56_HUMAN	unreviewed	cDNA FLJ46898 fis, clone UTERU3022168, highly similar to Protein FAM62A		Homo sapiens (Human)	1058		Membrane
B4DDH8	B4DDH8_HUMAN	unreviewed	cDNA FLJ55184, highly similar to Homo sapiens leukocyte receptor cluster (LRC) member 4 (LENG4), mRNA		Homo sapiens (Human)	454		Membrane
B4DDR6	B4DDR6_HUMAN	unreviewed	cDNA FLJ60414, highly similar to Solute carrier family 2, facilitated glucose transporter member 1		Homo sapiens (Human)	455		Membrane
B4DGL8	B4DGL8_HUMAN	unreviewed	ATP-binding cassette sub-family B member 7, mitochondrial (cDNA FLJ53391, highly similar to ATP-binding cassette sub-family B member 7, mitochondrial) (Fragment)	ABCB7	Homo sapiens (Human)	702		Membrane
B4DH58	B4DH58_HUMAN	unreviewed	cDNA FLJ56344, highly similar to Implantation-associated protein		Homo sapiens (Human)	367		Membrane
B4DHQ0	B4DHQ0_HUMAN	unreviewed	cDNA FLJ51849, highly similar to Mitochondrial carrier homolog 2		Homo sapiens (Human)	155		Membrane
B4DHX0	B4DHX0_HUMAN	unreviewed	cDNA FLJ51555, highly similar to Squalene monooxygenase (EC 1.14.99.7)		Homo sapiens (Human)	379		Membrane
B4DKB2	B4DKB2_HUMAN	unreviewed	Endothelin-converting enzyme 1 (cDNA FLJ59212, highly similar to Endothelin-converting enzyme 1 (EC 3.4.24.71))	ECE1	Homo sapiens (Human)	738		Membrane
B4DKC1	B4DKC1_HUMAN	unreviewed	Transmembrane 9 superfamily member		Homo sapiens (Human)	601		Membrane
B4DKM6	B4DKM6_HUMAN	unreviewed	cDNA FLJ54305, highly similar to Serum paraoxonase/arylesterase 2 (EC 3.1.1.2)		Homo sapiens (Human)	363		Membrane
B4DKS0	B4DKS0_HUMAN	unreviewed	cDNA FLJ53381, highly similar to Monocarboxylate transporter 1		Homo sapiens (Human)	480		Membrane
B4DKW1	B4DKW1_HUMAN	unreviewed	cDNA FLJ55703, highly similar to Solute carrier family 2, facilitated glucose transporter member 1		Homo sapiens (Human)	434		Membrane
B4DL07	B4DL07_HUMAN	unreviewed	cDNA FLJ53353, highly similar to ATP-binding cassette sub-family D member 3		Homo sapiens (Human)	683		Membrane
B4DLB8	B4DLB8_HUMAN	unreviewed	cDNA FLJ52205, highly similar to Beta-1,4-galactosyltransferase 1 (EC 2.4.1.-)		Homo sapiens (Human)	355		Membrane
B4DLL0	B4DLL0_HUMAN	unreviewed	cDNA FLJ58583, highly similar to GPI transamidase component PIG-S		Homo sapiens (Human)	494		Membrane
B4DMN9	B4DMN9_HUMAN	unreviewed	cDNA FLJ61320, highly similar to NAD(P) transhydrogenase, mitochondrial (EC 1.6.1.2)		Homo sapiens (Human)	601		Membrane
B4DN59	B4DN59_HUMAN	unreviewed	cDNA FLJ52702, highly similar to Homo sapiens CD44 antigen (homing function and Indian blood group system) (CD44), transcript variant 4, mRNA		Homo sapiens (Human)	329		Membrane
B4DN92	B4DN92_HUMAN	unreviewed	cDNA FLJ58594		Homo sapiens (Human)	531		Membrane
B4DNE1	B4DNE1_HUMAN	unreviewed	cDNA FLJ52708, highly similar to Basigin		Homo sapiens (Human)	385		Membrane
B4DS88	B4DS88_HUMAN	unreviewed	cDNA FLJ57576, highly similar to NAD(P) transhydrogenase, mitochondrial (EC 1.6.1.2)		Homo sapiens (Human)	559		Membrane
B4DS96	B4DS96_HUMAN	unreviewed	Uncharacterized protein		Homo sapiens (Human)	565		Membrane
B4DSC2	B4DSC2_HUMAN	unreviewed	Elongation of very long chain fatty acids protein (EC 2.3.1.199) (Very-long-chain 3-oxoacyl-CoA synthase)		Homo sapiens (Human)	289		Membrane
B4DUQ5	B4DUQ5_HUMAN	unreviewed	cDNA FLJ53610, highly similar to Mitochondrial folate transporter/carrier		Homo sapiens (Human)	183		Membrane
B4DW02	B4DW02_HUMAN	unreviewed	cDNA FLJ55597, highly similar to Serum paraoxonase/arylesterase 2 (EC 3.1.1.2)		Homo sapiens (Human)	375		Membrane
B4DWN1	B4DWN1_HUMAN	unreviewed	cDNA FLJ52285, highly similar to Vesicular integral-membrane protein VIP36		Homo sapiens (Human)	285		Membrane
B4DWS6	B4DWS6_HUMAN	unreviewed	cDNA FLJ61181, highly similar to Homo sapiens hydroxysteroid (17-beta) dehydrogenase 12 (HSD17B12), mRNA		Homo sapiens (Human)	304		Membrane
B4DX34	B4DX34_HUMAN	unreviewed	cDNA FLJ51554, highly similar to Squalene monooxygenase (EC 1.14.99.7)		Homo sapiens (Human)	479		Membrane
B4DXC4	B4DXC4_HUMAN	unreviewed	cDNA FLJ58636, moderately similar to Atlastin		Homo sapiens (Human)	523		Membrane
B4DY23	B4DY23_HUMAN	unreviewed	cDNA FLJ61188, highly similar to Basigin		Homo sapiens (Human)	262		Membrane
B4DZ22	B4DZ22_HUMAN	unreviewed	cDNA FLJ54042, highly similar to ATP-binding cassette sub-family D member 3		Homo sapiens (Human)	586		Membrane
B4DZ71	B4DZ71_HUMAN	unreviewed	cDNA FLJ55139, highly similar to Scavenger receptor class B member 1		Homo sapiens (Human)	516		Membrane
B4DZH3	B4DZH3_HUMAN	unreviewed	cDNA FLJ52032, highly similar to Transmembrane emp24 domain-containing protein 10		Homo sapiens (Human)	94		Membrane
B4DZK8	B4DZK8_HUMAN	unreviewed	cDNA FLJ61192, highly similar to Erythrocyte band 7 integral membrane protein		Homo sapiens (Human)	280		Membrane
B4E106	B4E106_HUMAN	unreviewed	cDNA FLJ53399, highly similar to Monocarboxylate transporter 1		Homo sapiens (Human)	480		Membrane
B4E290	B4E290_HUMAN	unreviewed	cDNA FLJ50039, highly similar to Homo sapiens solute carrier family 25, member 24, transcript variant 1, mRNA		Homo sapiens (Human)	477		Membrane
B4E310	B4E310_HUMAN	unreviewed	cDNA FLJ53133, highly similar to Erythrocyte band 7 integral membrane protein		Homo sapiens (Human)	187		Membrane
B4E3I1	B4E3I1_HUMAN	unreviewed	cDNA FLJ61086, highly similar to Scavenger receptor class B member 1		Homo sapiens (Human)	553		Membrane
B7Z1F1	B7Z1F1_HUMAN	unreviewed	cDNA FLJ53822, highly similar to GPI transamidase component PIG-T		Homo sapiens (Human)	423		Membrane
B7Z1N3	B7Z1N3_HUMAN	unreviewed	cDNA FLJ51050, highly similar to GPI transamidase component PIG-T (cDNA FLJ61680, highly similar to GPI transamidase component PIG-T)		Homo sapiens (Human)	316		Membrane
B7Z2I3	B7Z2I3_HUMAN	unreviewed	Receptor protein-tyrosine kinase (EC 2.7.10.1)		Homo sapiens (Human)	1157		Membrane
B7Z2N4	B7Z2N4_HUMAN	unreviewed	cDNA FLJ56074, highly similar to 150 kDa oxygen-regulated protein (Orp150)		Homo sapiens (Human)	981		Membrane
B7Z3L1	B7Z3L1_HUMAN	unreviewed	cDNA FLJ57311, highly similar to GPI transamidase component PIG-T		Homo sapiens (Human)	416		Membrane
B7Z596	B7Z596_HUMAN	unreviewed	Tropomyosin alpha-1 chain (cDNA FLJ55130, highly similar to Rattus norvegicus tropomyosin 1, alpha (Tpm1), transcript variant 8, mRNA)	TPM1	Homo sapiens (Human)	275		Membrane
B7Z605	B7Z605_HUMAN	unreviewed	cDNA FLJ53092, moderately similar to Surfeit locus protein 4		Homo sapiens (Human)	214		Membrane
B7Z943	B7Z943_HUMAN	unreviewed	cDNA FLJ53131, highly similar to 24-dehydrocholesterol reductase (EC 1.3.1.-)		Homo sapiens (Human)	242		Membrane
B7ZA80	B7ZA80_HUMAN	unreviewed	cDNA, FLJ79094, highly similar to HLA class I histocompatibility antigen, A-30alpha chain (cDNA, FLJ79097, highly similar to HLA class I histocompatibility antigen, A-30alpha chain)		Homo sapiens (Human)	225		Membrane
B7ZB41	B7ZB41_HUMAN	unreviewed	cDNA, FLJ79405, highly similar to Homo sapiens solute carrier family 25, member 24, transcript variant 1, mRNA		Homo sapiens (Human)	477		Membrane
B7ZKQ9	B7ZKQ9_HUMAN	unreviewed	SCARB1 protein (Scavenger receptor class B member 1)	SCARB1	Homo sapiens (Human)	481		Membrane
C0KXH2	C0KXH2_HUMAN	unreviewed	MHC class I antigen	HLA-B	Homo sapiens (Human)	362		Membrane
C1K0Y0	C1K0Y0_HUMAN	unreviewed	MHC class I antigen	HLA-Cw HLA-C	Homo sapiens (Human)	366		Membrane
C1K0Y1	C1K0Y1_HUMAN	unreviewed	HLA class I antigen (MHC class I antigen)	HLA-Cw HLA-C	Homo sapiens (Human)	366		Membrane
C1PHA2	C1PHA2_HUMAN	unreviewed	Tyrosine-protein kinase receptor (EC 2.7.10.1)	KIF5B-ALK	Homo sapiens (Human)	1483		Membrane
C5IYE4	C5IYE4_HUMAN	unreviewed	MHC class I antigen	HLA-Cw HLA-C	Homo sapiens (Human)	366		Membrane
C5IYE6	C5IYE6_HUMAN	unreviewed	MHC class I antigen	HLA-Cw HLA-C	Homo sapiens (Human)	366		Membrane
C5J3Z7	C5J3Z7_HUMAN	unreviewed	MHC class I antigen	HLA-B	Homo sapiens (Human)	362		Membrane
C9J1E7	C9J1E7_HUMAN	unreviewed	AP-1 complex subunit beta-1 (Fragment)	AP1B1	Homo sapiens (Human)	578		Membrane
C9J4E9	C9J4E9_HUMAN	unreviewed	Lysophospholipid acyltransferase 7 (Fragment)	MBOAT7	Homo sapiens (Human)	170		Membrane
C9J9I1	C9J9I1_HUMAN	unreviewed	Selenoprotein I	SELI hCG_1651316	Homo sapiens (Human)	386		Membrane
C9JAG1	C9JAG1_HUMAN	unreviewed	Ethanolaminephosphotransferase 1 (Fragment)	SELENOI	Homo sapiens (Human)	180		Membrane
D3DR22	D3DR22_HUMAN	unreviewed	Hydroxysteroid (17-beta) dehydrogenase 12, isoform CRA_a	HSD17B12 hCG_16453	Homo sapiens (Human)	352		Membrane
E5KLJ5	E5KLJ5_HUMAN	unreviewed	Dynamin-like 120 kDa protein, mitochondrial (Mitochondrial dynamin-like 120 kDa protein) (Optic atrophy 1 (Autosomal dominant), isoform CRA_g)	OPA1 hCG_17270	Homo sapiens (Human)	1015		Membrane
E5KLJ6	E5KLJ6_HUMAN	unreviewed	Dynamin-like 120 kDa protein, mitochondrial (Mitochondrial dynamin-like 120 kDa protein) (Optic atrophy 1 (Autosomal dominant), isoform CRA_c)	OPA1 hCG_17270	Homo sapiens (Human)	978		Membrane
E5KLJ7	E5KLJ7_HUMAN	unreviewed	Mitochondrial dynamin-like 120 kDa protein (Optic atrophy 1 (Autosomal dominant), isoform CRA_d)	OPA1 hCG_17270	Homo sapiens (Human)	997		Membrane
E5KLK1	E5KLK1_HUMAN	unreviewed	Dynamin-like 120 kDa protein, mitochondrial (Mitochondrial dynamin-like 120 kDa protein) (Optic atrophy 1 (Autosomal dominant), isoform CRA_f)	OPA1 hCG_17270	Homo sapiens (Human)	961		Membrane
E5KLK2	E5KLK2_HUMAN	unreviewed	Mitochondrial dynamin-like 120 kDa protein (Optic atrophy 1 (Autosomal dominant), isoform CRA_b)	OPA1 hCG_17270	Homo sapiens (Human)	924		Membrane
E5RFP9	E5RFP9_HUMAN	unreviewed	Histone deacetylase 2 (Fragment)	HDAC2	Homo sapiens (Human)	109		Membrane
E7BSV0	E7BSV0_HUMAN	unreviewed	Receptor protein-tyrosine kinase (EC 2.7.10.1)	EGFR	Homo sapiens (Human)	1136		Membrane
E7ENN3	E7ENN3_HUMAN	unreviewed	Nesprin-1	SYNE1	Homo sapiens (Human)	8392		Membrane
E7EVQ6	E7EVQ6_HUMAN	unreviewed	Squalene monooxygenase	SQLE	Homo sapiens (Human)	479		Membrane
E9PCX7	E9PCX7_HUMAN	unreviewed	NAD(P) transhydrogenase, mitochondrial	NNT	Homo sapiens (Human)	955		Membrane
E9PFD7	E9PFD7_HUMAN	unreviewed	Receptor protein-tyrosine kinase (EC 2.7.10.1)	EGFR	Homo sapiens (Human)	1165		Membrane
E9PIE4	E9PIE4_HUMAN	unreviewed	Mitochondrial carrier homolog 2 (Fragment)	MTCH2	Homo sapiens (Human)	262		Membrane
E9PJ54	E9PJ54_HUMAN	unreviewed	7-dehydrocholesterol reductase (Fragment)	DHCR7	Homo sapiens (Human)	164		Membrane
E9PJS0	E9PJS0_HUMAN	unreviewed	Acetolactate synthase-like protein (Fragment)	ILVBL	Homo sapiens (Human)	262		Membrane
E9PJW4	E9PJW4_HUMAN	unreviewed	Protein wntless homolog (Fragment)	WLS	Homo sapiens (Human)	134		Membrane
E9PKJ0	E9PKJ0_HUMAN	unreviewed	Protein wntless homolog (Fragment)	WLS	Homo sapiens (Human)	122		Membrane
E9PL44	E9PL44_HUMAN	unreviewed	Acetolactate synthase-like protein (Fragment)	ILVBL	Homo sapiens (Human)	166		Membrane
E9PM00	E9PM00_HUMAN	unreviewed	7-dehydrocholesterol reductase (Fragment)	DHCR7	Homo sapiens (Human)	258		Membrane
E9PM62	E9PM62_HUMAN	unreviewed	Protein wntless homolog (Fragment)	WLS	Homo sapiens (Human)	222		Membrane
E9PP73	E9PP73_HUMAN	unreviewed	Coatomer subunit beta (Fragment)	COPB1	Homo sapiens (Human)	485		Membrane
F2YGG7	F2YGG7_HUMAN	unreviewed	Receptor protein-tyrosine kinase (EC 2.7.10.1)		Homo sapiens (Human)	1167		Membrane
F5H4X0	F5H4X0_HUMAN	unreviewed	Scavenger receptor class B member 1	SCARB1	Homo sapiens (Human)	499		Membrane
F5H6I7	F5H6I7_HUMAN	unreviewed	Atlastin-3	ATL3	Homo sapiens (Human)	523		Membrane
F6W983	F6W983_HUMAN	unreviewed	GPI transamidase component PIG-T (Phosphatidylinositol glycan, class T, isoform CRA_a)	PIGT hCG_38369	Homo sapiens (Human)	384		Membrane
F8VSL7	F8VSL7_HUMAN	unreviewed	Erythrocyte band 7 integral membrane protein	STOM	Homo sapiens (Human)	168		Membrane
F8VX04	F8VX04_HUMAN	unreviewed	Sodium-coupled neutral amino acid transporter 1	SLC38A1	Homo sapiens (Human)	503		Membrane
G1UI38	G1UI38_HUMAN	unreviewed	Ethanolaminephosphotransferase 1 (Fragment)	EPT1	Homo sapiens (Human)	202		Membrane
G3V1R7	G3V1R7_HUMAN	unreviewed	Solute carrier family 27 (Fatty acid transporter), member 2, isoform CRA_b (Very long-chain acyl-CoA synthetase)	SLC27A2 hCG_39815	Homo sapiens (Human)	385		Membrane
G3XAN4	G3XAN4_HUMAN	unreviewed	Translocating chain-associated membrane protein 1 (Translocation associated membrane protein 1, isoform CRA_a)	TRAM1 hCG_18447	Homo sapiens (Human)	288		Membrane
G5E9Z2	G5E9Z2_HUMAN	unreviewed	Cisplatin resistance related protein CRR9p, isoform CRA_c (Cleft lip and palate transmembrane protein 1-like protein)	CLPTM1L CRR9 hCG_1810932	Homo sapiens (Human)	369		Membrane
H0Y2P0	H0Y2P0_HUMAN	unreviewed	CD44 antigen (Fragment)	CD44	Homo sapiens (Human)	287		Membrane
H0Y5E4	H0Y5E4_HUMAN	unreviewed	CD44 antigen (Fragment)	CD44	Homo sapiens (Human)	294		Membrane
H0YAV1	H0YAV1_HUMAN	unreviewed	Ribonucleoside-diphosphate reductase subunit M2 B (Fragment)	RRM2B	Homo sapiens (Human)	408		Membrane
H0YCG9	H0YCG9_HUMAN	unreviewed	Protein wntless homolog (Fragment)	WLS	Homo sapiens (Human)	200		Membrane
H0YD13	H0YD13_HUMAN	unreviewed	CD44 antigen	CD44	Homo sapiens (Human)	206		Membrane
H0YMD1	H0YMD1_HUMAN	unreviewed	Low-density lipoprotein receptor	LDLR	Homo sapiens (Human)	948		Membrane
H3BMU0	H3BMU0_HUMAN	unreviewed	Transmembrane protein 87A (Fragment)	TMEM87A	Homo sapiens (Human)	170		Membrane
H3BTS6	H3BTS6_HUMAN	unreviewed	Transmembrane protein 87A (Fragment)	TMEM87A	Homo sapiens (Human)	195		Membrane
H3BTW4	H3BTW4_HUMAN	unreviewed	Sarcoplasmic/endoplasmic reticulum calcium ATPase 1 (Fragment)	ATP2A1	Homo sapiens (Human)	128		Membrane
H3BV54	H3BV54_HUMAN	unreviewed	Homocysteine-responsive endoplasmic reticulum-resident ubiquitin-like domain member 1 protein (Fragment)	HERPUD1	Homo sapiens (Human)	150		Membrane
H7BXI1	H7BXI1_HUMAN	unreviewed	Extended synaptotagmin-2 (Fragment)	ESYT2	Homo sapiens (Human)	884		Membrane
H7C046	H7C046_HUMAN	unreviewed	Neutral cholesterol ester hydrolase 1 (Fragment)	NCEH1	Homo sapiens (Human)	307		Membrane
I3L4X2	I3L4X2_HUMAN	unreviewed	Multidrug resistance-associated protein 1 (Fragment)	ABCC1	Homo sapiens (Human)	1440		Membrane
J3KMZ9	J3KMZ9_HUMAN	unreviewed	Low-density lipoprotein receptor (Fragment)	LDLR	Homo sapiens (Human)	945		Membrane
J3KS45	J3KS45_HUMAN	unreviewed	Calcium load-activated calcium channel (Fragment)	TMCO1	Homo sapiens (Human)	143		Membrane
J3KSI6	J3KSI6_HUMAN	unreviewed	Desmoglein-2	DSG2	Homo sapiens (Human)	232		Membrane
J3QQY2	J3QQY2_HUMAN	unreviewed	Calcium load-activated calcium channel (Transmembrane and coiled-coil domains 1, isoform CRA_c)	TMCO1 hCG_1766418	Homo sapiens (Human)	104		Membrane
J9JIE6	J9JIE6_HUMAN	unreviewed	Calcium load-activated calcium channel (Transmembrane and coiled-coil domains 1, isoform CRA_b)	TMCO1 hCG_1766418	Homo sapiens (Human)	239		Membrane
K4RH56	K4RH56_HUMAN	unreviewed	HLA class I antigen (MHC class I antigen)	HLA-C	Homo sapiens (Human)	366		Membrane
K7EJ34	K7EJ34_HUMAN	unreviewed	Reticulophagy regulator 3	RETREG3	Homo sapiens (Human)	129		Membrane
K7ELZ9	K7ELZ9_HUMAN	unreviewed	Nicalin (Fragment)	NCLN	Homo sapiens (Human)	282		Membrane
K7EMW4	K7EMW4_HUMAN	unreviewed	Nicalin (Nicalin homolog (Zebrafish), isoform CRA_e)	NCLN hCG_23630	Homo sapiens (Human)	489		Membrane
K7ENF4	K7ENF4_HUMAN	unreviewed	Reticulophagy regulator 3	RETREG3	Homo sapiens (Human)	133		Membrane
K7ENM2	K7ENM2_HUMAN	unreviewed	Nicalin (Fragment)	NCLN	Homo sapiens (Human)	328		Membrane
K7EPQ7	K7EPQ7_HUMAN	unreviewed	Protein YIF1B	YIF1B	Homo sapiens (Human)	248		Membrane
M0QXM3	M0QXM3_HUMAN	unreviewed	Very-long-chain enoyl-CoA reductase (Fragment)	TECR	Homo sapiens (Human)	131		Membrane
M0R047	M0R047_HUMAN	unreviewed	Mitochondrial import inner membrane translocase subunit TIM50 (Fragment)	TIMM50	Homo sapiens (Human)	227		Membrane
M1V481	M1V481_HUMAN	unreviewed	Tyrosine-protein kinase receptor (EC 2.7.10.1)	KIF5B-ALK_K17;A20	Homo sapiens (Human)	1240		Membrane
M4QFU4	M4QFU4_HUMAN	unreviewed	MHC class I antigen	HLA-B	Homo sapiens (Human)	362		Membrane
O19617	O19617_HUMAN	unreviewed	HLA class I antigen (HLA class I histocompatibility antigen, Cw-6 alpha chain) (HLA-C protein) (MHC class I antigen) (Major histocompatibility complex, class I, C)	HLA-C HLA-Cw	Homo sapiens (Human)	366		Membrane
Q05D40	Q05D40_HUMAN	unreviewed	CYP51A1 protein (Fragment)	CYP51A1	Homo sapiens (Human)	180		Membrane
Q0P512	Q0P512_HUMAN	unreviewed	Solute carrier family 2 (Facilitated glucose transporter), member 1	SLC2A1	Homo sapiens (Human)	492		Membrane
Q0PHP6	Q0PHP6_HUMAN	unreviewed	MHC class I antigen	HLA-C	Homo sapiens (Human)	366		Membrane
Q0QF12	Q0QF12_HUMAN	unreviewed	Succinate dehydrogenase (quinone) (EC 1.3.5.1) (Fragment)	SDHA	Homo sapiens (Human)	550		Membrane
Q147T7	Q147T7_HUMAN	unreviewed	EGFR protein	EGFR	Homo sapiens (Human)	464		Membrane
Q2MCL6	Q2MCL6_HUMAN	unreviewed	Large neutral amino acids transporter 1 (Fragment)	SLC7A5	Homo sapiens (Human)	71		Membrane
Q2TB59	Q2TB59_HUMAN	unreviewed	Nicotinamide nucleotide transhydrogenase	NNT	Homo sapiens (Human)	1086		Membrane
Q2TTR7	Q2TTR7_HUMAN	unreviewed	Receptor protein-tyrosine kinase (EC 2.7.10.1)		Homo sapiens (Human)	1210		Membrane
Q3LIB1	Q3LIB1_HUMAN	unreviewed	Uncharacterized protein Nbla00445 (Fragment)	Nbla00445	Homo sapiens (Human)	905		Membrane
Q4AEJ3	Q4AEJ3_HUMAN	unreviewed	Mitochondrial transmembrane GTPase Fzo-1	hfzo1	Homo sapiens (Human)	741		Membrane
Q4AEJ4	Q4AEJ4_HUMAN	unreviewed	Mitochondrial transmembrane GTPase FZO-2	hfzo2	Homo sapiens (Human)	769		Membrane
Q502X7	Q502X7_HUMAN	unreviewed	Elongation of very long chain fatty acids protein (EC 2.3.1.199) (Very-long-chain 3-oxoacyl-CoA synthase)	ELOVL1	Homo sapiens (Human)	144		Membrane
Q504U8	Q504U8_HUMAN	unreviewed	Receptor protein-tyrosine kinase (EC 2.7.10.1)	EGFR	Homo sapiens (Human)	1091		Membrane
Q508I5	Q508I5_HUMAN	unreviewed	Anthrax toxin receptor/neuroblastoma fusion protein transcript variant 4	ANTXR1/NNG1 fusion	Homo sapiens (Human)	411		Membrane
Q508I6	Q508I6_HUMAN	unreviewed	Anthrax toxin receptor/neuroblastoma fusion protein transcript variant 3	ANTXR1/NNG1 fusion	Homo sapiens (Human)	410		Membrane
Q508I7	Q508I7_HUMAN	unreviewed	Anthrax toxin receptor/neuroblastoma fusion protein transcript variant 2	ANTXR1/NNG1 fusion	Homo sapiens (Human)	419		Membrane
Q508I8	Q508I8_HUMAN	unreviewed	Anthrax toxin receptor/neuroblastoma fusion protein transcript variant 1	ANTXR1/NNG1 fusion	Homo sapiens (Human)	387		Membrane
Q53F53	Q53F53_HUMAN	unreviewed	Atlastin variant (Fragment)		Homo sapiens (Human)	558		Membrane
Q53G34	Q53G34_HUMAN	unreviewed	Mitochondrial carrier homolog 2 variant (Fragment)		Homo sapiens (Human)	303		Membrane
Q53GS2	Q53GS2_HUMAN	unreviewed	Solute carrier family 27 (Fatty acid transporter), member 2 variant (Fragment)		Homo sapiens (Human)	620		Membrane
Q53X46	Q53X46_HUMAN	unreviewed	MHC class I antigen	HLA-C HLA-Cw	Homo sapiens (Human)	366		Membrane
Q546I7	Q546I7_HUMAN	unreviewed	MHC class I antigen	HLA-C HLA-Cw	Homo sapiens (Human)	366		Membrane
Q54A51	Q54A51_HUMAN	unreviewed	Basigin (Ok blood group), isoform CRA_a (Cervical EMMPRIN) (cDNA FLJ36018 fis, clone TESTI2016337, highly similar to BASIGIN)	hEMMPRIN BSG hCG_20562	Homo sapiens (Human)	269		Membrane
Q59ED7	Q59ED7_HUMAN	unreviewed	Uncharacterized protein (Fragment)		Homo sapiens (Human)	686		Membrane
Q59FC9	Q59FC9_HUMAN	unreviewed	Enigma homolog (Fragment)		Homo sapiens (Human)	436		Membrane
Q59FL8	Q59FL8_HUMAN	unreviewed	Receptor protein-tyrosine kinase (EC 2.7.10.1) (Fragment)		Homo sapiens (Human)	1081		Membrane
Q59FM4	Q59FM4_HUMAN	unreviewed	Scavenger receptor class B member 1 variant (Fragment)		Homo sapiens (Human)	581		Membrane
Q59GX2	Q59GX2_HUMAN	unreviewed	Solute carrier family 2 (Facilitated glucose transporter), member 1 variant (Fragment)		Homo sapiens (Human)	517		Membrane
Q59H57	Q59H57_HUMAN	unreviewed	Fusion (Involved in t(12;16) in malignant liposarcoma) isoform a variant (Fragment)		Homo sapiens (Human)	300		Membrane
Q59H65	Q59H65_HUMAN	unreviewed	Aldehyde dehydrogenase 3A2 variant (Fragment)		Homo sapiens (Human)	461		Membrane
Q59HD5	Q59HD5_HUMAN	unreviewed	3-mercaptopyruvate sulfurtransferase variant (Fragment)		Homo sapiens (Human)	314		Membrane
Q59HH3	Q59HH3_HUMAN	unreviewed	Trifunctional purine biosynthetic protein adenosine-3 [Includes: Phosphoribosylamine--glycine ligase (EC 6.3.4.13) (Glycinamide ribonucleotide synthetase) (GARS) (Phosphoribosylglycinamide synthetase); Phosphoribosylformylglycinamidine cyclo-ligase (EC 6.3.3.1) (AIR synthase) (AIRS) (Phosphoribosyl-aminoimidazole synthetase); Phosphoribosylglycinamide formyltransferase (EC 2.1.2.2) (5'-phosphorib…		Homo sapiens (Human)	1046		Membrane
Q5HYI4	Q5HYI4_HUMAN	unreviewed	Uncharacterized protein DKFZp686B0215	DKFZp686B0215	Homo sapiens (Human)	574		Membrane
Q5RIP0	Q5RIP0_HUMAN	unreviewed	MHC class I antigen	HLA-Cw HLA-C	Homo sapiens (Human)	366		Membrane
Q5SS57	Q5SS57_HUMAN	unreviewed	HLA class I antigen (MHC class I antigen) (MICA protein)	HLA-B MICA	Homo sapiens (Human)	362		Membrane
Q5T8R5	Q5T8R5_HUMAN	unreviewed	Monocarboxylate transporter 1 (Solute carrier family 16 (Monocarboxylic acid transporters), member 1, isoform CRA_a) (Fragment)	SLC16A1 hCG_37455	Homo sapiens (Human)	456		Membrane
Q5TC01	Q5TC01_HUMAN	unreviewed	Sodium/potassium-transporting ATPase subunit alpha-1 (Fragment)	ATP1A1	Homo sapiens (Human)	144		Membrane
Q5TC02	Q5TC02_HUMAN	unreviewed	Sodium/potassium-transporting ATPase subunit alpha-1 (Fragment)	ATP1A1	Homo sapiens (Human)	106		Membrane
Q64EU5	Q64EU5_HUMAN	unreviewed	MHC class I antigen (MHC class I antigen precusor)	HLA-Cw	Homo sapiens (Human)	366		Membrane
Q68CP7	Q68CP7_HUMAN	unreviewed	Uncharacterized protein DKFZp781G125	DKFZp781G125	Homo sapiens (Human)	1215		Membrane
Q6AI41	Q6AI41_HUMAN	unreviewed	Uncharacterized protein DKFZp686M05248	DKFZp686M05248	Homo sapiens (Human)	297		Membrane
Q6FHL3	Q6FHL3_HUMAN	unreviewed	Translocating chain-associated membrane protein	TRAM1 hCG_18447	Homo sapiens (Human)	374		Membrane
Q6FHU7	Q6FHU7_HUMAN	unreviewed	TRAM1 protein (Fragment)	TRAM1	Homo sapiens (Human)	374		Membrane
Q6IAK1	Q6IAK1_HUMAN	unreviewed	SPG3A protein	SPG3A	Homo sapiens (Human)	475		Membrane
Q6IB11	Q6IB11_HUMAN	unreviewed	PGRMC1 protein (Progesterone receptor membrane component 1) (Progesterone receptor membrane component 1, isoform CRA_a) (cDNA, FLJ94602, Homo sapiens progesterone receptor membrane component 1 (PGRMC1),mRNA)	PGRMC1 hCG_23188	Homo sapiens (Human)	195		Membrane
Q6MZW5	Q6MZW5_HUMAN	unreviewed	Uncharacterized protein DKFZp686K20216 (Fragment)	DKFZp686K20216	Homo sapiens (Human)	162		Membrane
Q6NWZ1	Q6NWZ1_HUMAN	unreviewed	CKAP4 protein (Fragment)	CKAP4	Homo sapiens (Human)	600		Membrane
Q7RTM4	Q7RTM4_HUMAN	unreviewed	Spectrin-like protein of the nuclear envelope and Golgi	SYNE1	Homo sapiens (Human)	8407		Membrane
Q7YNW6	Q7YNW6_HUMAN	unreviewed	MHC class I antigen (Major histocompatibility complex, class I, C)	HLA-C HLA-Cw	Homo sapiens (Human)	366		Membrane
Q7YQB2	Q7YQB2_HUMAN	unreviewed	MHC class I antigen	HLA-Cw HLA-C	Homo sapiens (Human)	366		Membrane
Q85ZX8	Q85ZX8_HUMAN	unreviewed	MHC class I antigen	HLA-Cw HLA-C	Homo sapiens (Human)	366		Membrane
Q86XA6	Q86XA6_HUMAN	unreviewed	B4GALT1 protein (Beta-1,4-galactosyltransferase 1)	B4GALT1	Homo sapiens (Human)	225		Membrane
Q8N2N3	Q8N2N3_HUMAN	unreviewed	cDNA FLJ90102 fis, clone HEMBA1006299, highly similar to Putative NFkB activating protein 373		Homo sapiens (Human)	243		Membrane
Q8N5H5	Q8N5H5_HUMAN	unreviewed	NNT protein (Fragment)	NNT	Homo sapiens (Human)	236		Membrane
Q8NBL9	Q8NBL9_HUMAN	unreviewed	cDNA PSEC0119 fis, clone PLACE1002376, highly similar to GPI transamidase component PIG-S		Homo sapiens (Human)	555		Membrane
Q8NCC4	Q8NCC4_HUMAN	unreviewed	Transmembrane 9 superfamily member		Homo sapiens (Human)	399		Membrane
Q8NCD8	Q8NCD8_HUMAN	unreviewed	cDNA FLJ90316 fis, clone NT2RP2001495, weakly similar to Human transporter protein (g17)		Homo sapiens (Human)	413		Membrane
Q8TB01	Q8TB01_HUMAN	unreviewed	Similar to cytoskeleton-associated protein 4 (Fragment)		Homo sapiens (Human)	560		Membrane
Q8TDJ5	Q8TDJ5_HUMAN	unreviewed	Tyrosine-protein kinase receptor (EC 2.7.10.1)	TFG/ALK fusion	Homo sapiens (Human)	803		Membrane
Q8WU57	Q8WU57_HUMAN	unreviewed	SELI protein (Selenoprotein I) (Uncharacterized protein tmp_locus_24)	SELI tmp_locus_24 hCG_1651316	Homo sapiens (Human)	258		Membrane
Q8WUB5	Q8WUB5_HUMAN	unreviewed	Transmembrane 9 superfamily member (Fragment)	TM9SF3	Homo sapiens (Human)	521		Membrane
Q8WY81	Q8WY81_HUMAN	unreviewed	PP3895		Homo sapiens (Human)	135		Membrane
Q95HC2	Q95HC2_HUMAN	unreviewed	HLA-C protein (Fragment)	HLA-C	Homo sapiens (Human)	365		Membrane
Q96IR5	Q96IR5_HUMAN	unreviewed	PIGS protein (Fragment)	PIGS	Homo sapiens (Human)	474		Membrane
Q96IV8	Q96IV8_HUMAN	unreviewed	GPR177 protein (Fragment)	GPR177	Homo sapiens (Human)	487		Membrane
Q96NG1	Q96NG1_HUMAN	unreviewed	cDNA FLJ30950 fis, clone HCASM1000061		Homo sapiens (Human)	184		Membrane
Q9BSY0	Q9BSY0_HUMAN	unreviewed	PTDSS1 protein (Fragment)	PTDSS1	Homo sapiens (Human)	331		Membrane
Q9BVC1	Q9BVC1_HUMAN	unreviewed	PIGS protein (Fragment)	PIGS	Homo sapiens (Human)	243		Membrane
Q9HBR2	Q9HBR2_HUMAN	unreviewed	Uncharacterized protein		Homo sapiens (Human)	209		Membrane
Q9UH51	Q9UH51_HUMAN	unreviewed	Low density lipoprotein receptor (Fragment)	LDLR	Homo sapiens (Human)	837		Membrane
Q9UNR6	Q9UNR6_HUMAN	unreviewed	Squalene epoxidase (EC 1.14.99.7) (cDNA, FLJ93917, highly similar to Homo sapiens squalene epoxidase (SQLE), mRNA)	ERG1 SQLE hCG_14874	Homo sapiens (Human)	574		Membrane
Q9UQ98	Q9UQ98_HUMAN	unreviewed	Multidrug resistance protein (Fragment)	MRP	Homo sapiens (Human)	1400		Membrane
S6AU73	S6AU73_HUMAN	unreviewed	MHC class I antigen	HLA-B HLA B	Homo sapiens (Human)	362		Membrane
S6EYQ3	S6EYQ3_HUMAN	unreviewed	MHC class I antigen	HLA-B	Homo sapiens (Human)	362		Membrane
W6MEN3	W6MEN3_HUMAN	unreviewed	Beta-1,4-galactosyltransferase 1	B4GALT1	Homo sapiens (Human)	357		Membrane
W6MEN4	W6MEN4_HUMAN	unreviewed	Beta-1,4-galactosyltransferase 1	B4GALT1	Homo sapiens (Human)	219		Membrane
X5D9E1	X5D9E1_HUMAN	unreviewed	7-dehydrocholesterol reductase isoform C (Fragment)	DHCR7	Homo sapiens (Human)	201		Membrane
X5DRD7	X5DRD7_HUMAN	unreviewed	7-dehydrocholesterol reductase isoform B	DHCR7	Homo sapiens (Human)	335		Membrane
X5M233	X5M233_HUMAN	unreviewed	MHC class I antigen	HLA-B	Homo sapiens (Human)	362		Membrane
B7Z9S8	B7Z9S8_HUMAN	unreviewed	Sodium/potassium-transporting ATPase subunit beta		Homo sapiens (Human)	247	SUBCELLULAR LOCATION: Membrane {ECO:0000256|RuleBase:RU362099}; Single-pass type II membrane protein {ECO:0000256|RuleBase:RU362099}.	Membrane
V9GYR2	V9GYR2_HUMAN	unreviewed	Sodium/potassium-transporting ATPase subunit beta (Fragment)	ATP1B1	Homo sapiens (Human)	130	SUBCELLULAR LOCATION: Membrane {ECO:0000256|RuleBase:RU362099}; Single-pass type II membrane protein {ECO:0000256|RuleBase:RU362099}.	Membrane
P09622	DLDH_HUMAN	reviewed	Dihydrolipoyl dehydrogenase, mitochondrial (EC 1.8.1.4) (Dihydrolipoamide dehydrogenase) (Glycine cleavage system L protein)	DLD GCSL LAD PHE3	Homo sapiens (Human)	509	SUBCELLULAR LOCATION: Mitochondrion matrix {ECO:0000305|PubMed:3693355}. Cytoplasmic vesicle, secretory vesicle, acrosome {ECO:0000269|PubMed:15888450}. Cell projection, cilium, flagellum {ECO:0000250|UniProtKB:Q811C4}.	Mitcochondrion
Q00796	DHSO_HUMAN	reviewed	Sorbitol dehydrogenase (EC 1.1.1.14) (L-iditol 2-dehydrogenase)	SORD	Homo sapiens (Human)	357	SUBCELLULAR LOCATION: Mitochondrion membrane {ECO:0000250|UniProtKB:Q64442}; Peripheral membrane protein {ECO:0000250|UniProtKB:Q64442}. Cell projection, cilium, flagellum {ECO:0000250|UniProtKB:Q64442}. Note=Associated with mitochondria of the midpiece and near the plasma membrane in the principal piece of the flagellum. Also found in the epididymosome, secreted by the epididymal epithelium and …	Mitcochondrion
O00411	RPOM_HUMAN	reviewed	DNA-directed RNA polymerase, mitochondrial (MtRPOL) (EC 2.7.7.6)	POLRMT	Homo sapiens (Human)	1230	SUBCELLULAR LOCATION: Mitochondrion.	Mitochondrion
Q9Y305	ACOT9_HUMAN	reviewed	Acyl-coenzyme A thioesterase 9, mitochondrial (Acyl-CoA thioesterase 9) (EC 3.1.2.-) (Acyl-CoA thioester hydrolase 9)	ACOT9 CGI-16	Homo sapiens (Human)	439	SUBCELLULAR LOCATION: Mitochondrion {ECO:0000250}.	Mitochondrion
Q96I99	SUCB2_HUMAN	reviewed	Succinate--CoA ligase [GDP-forming] subunit beta, mitochondrial (EC 6.2.1.4) (GTP-specific succinyl-CoA synthetase subunit beta) (G-SCS) (GTPSCS) (Succinyl-CoA synthetase beta-G chain) (SCS-betaG)	SUCLG2	Homo sapiens (Human)	432	SUBCELLULAR LOCATION: Mitochondrion {ECO:0000255|HAMAP-Rule:MF_03221}.	Mitochondrion
C9IZ01	C9IZ01_HUMAN	unreviewed	Elongation factor G, mitochondrial (EF-Gmt) (Elongation factor G 1, mitochondrial) (mEF-G 1) (Elongation factor G1)	GFM1 EFG1	Homo sapiens (Human)	591	SUBCELLULAR LOCATION: Mitochondrion {ECO:0000256|HAMAP-Rule:MF_03061}.	Mitochondrion
E5KND5	E5KND5_HUMAN	unreviewed	Elongation factor G, mitochondrial (EF-Gmt) (Elongation factor G 1, mitochondrial) (mEF-G 1) (Elongation factor G1)	GFM1 EFG1	Homo sapiens (Human)	751	SUBCELLULAR LOCATION: Mitochondrion {ECO:0000256|HAMAP-Rule:MF_03061}.	Mitochondrion
E5KND7	E5KND7_HUMAN	unreviewed	Elongation factor G, mitochondrial (EF-Gmt) (Elongation factor G 1, mitochondrial) (mEF-G 1) (Elongation factor G1)	GFM1 EFG1	Homo sapiens (Human)	751	SUBCELLULAR LOCATION: Mitochondrion {ECO:0000256|HAMAP-Rule:MF_03061}.	Mitochondrion
A0A024R048	A0A024R048_HUMAN	unreviewed	NAD kinase 2, mitochondrial (EC 2.7.1.23) (NAD kinase domain-containing protein 1, mitochondrial)	FLJ30596 hCG_37582	Homo sapiens (Human)	279	SUBCELLULAR LOCATION: Mitochondrion {ECO:0000256|PIRNR:PIRNR017565}.	Mitochondrion
B7Z8V7	B7Z8V7_HUMAN	unreviewed	NAD kinase 2, mitochondrial (EC 2.7.1.23) (NAD kinase domain-containing protein 1, mitochondrial)	NADK2	Homo sapiens (Human)	301	SUBCELLULAR LOCATION: Mitochondrion {ECO:0000256|PIRNR:PIRNR017565}.	Mitochondrion
B4DJB4	B4DJB4_HUMAN	unreviewed	Isocitrate dehydrogenase [NAD] subunit, mitochondrial (EC 1.1.1.41)		Homo sapiens (Human)	316	SUBCELLULAR LOCATION: Mitochondrion {ECO:0000256|RuleBase:RU361266}.	Mitochondrion
Q53GF8	Q53GF8_HUMAN	unreviewed	Isocitrate dehydrogenase [NAD] subunit, mitochondrial (EC 1.1.1.41) (Fragment)		Homo sapiens (Human)	366	SUBCELLULAR LOCATION: Mitochondrion {ECO:0000256|RuleBase:RU361266}.	Mitochondrion
B4DWZ4	B4DWZ4_HUMAN	unreviewed	Flap endonuclease 1 (FEN-1) (EC 3.1.-.-) (Flap structure-specific endonuclease 1)	FEN1	Homo sapiens (Human)	344	SUBCELLULAR LOCATION: Mitochondrion {ECO:0000256|SAAS:SAAS00725520}.; SUBCELLULAR LOCATION: Nucleus, nucleolus {ECO:0000256|HAMAP-Rule:MF_03140}. Nucleus, nucleoplasm {ECO:0000256|HAMAP-Rule:MF_03140}. Mitochondrion {ECO:0000256|HAMAP-Rule:MF_03140}. Note=Resides mostly in the nucleoli and relocalizes to the nucleoplasm upon DNA damage. {ECO:0000256|HAMAP-Rule:MF_03140}.	Mitochondrion
Q6FHX6	Q6FHX6_HUMAN	unreviewed	Flap endonuclease 1 (FEN-1) (EC 3.1.-.-) (Flap structure-specific endonuclease 1)	FEN1 hCG_40848	Homo sapiens (Human)	380	SUBCELLULAR LOCATION: Mitochondrion {ECO:0000256|SAAS:SAAS00725520}.; SUBCELLULAR LOCATION: Nucleus, nucleolus {ECO:0000256|HAMAP-Rule:MF_03140}. Nucleus, nucleoplasm {ECO:0000256|HAMAP-Rule:MF_03140}. Mitochondrion {ECO:0000256|HAMAP-Rule:MF_03140}. Note=Resides mostly in the nucleoli and relocalizes to the nucleoplasm upon DNA damage. {ECO:0000256|HAMAP-Rule:MF_03140}.	Mitochondrion
Q9NNW7	TRXR2_HUMAN	reviewed	Thioredoxin reductase 2, mitochondrial (EC 1.8.1.9) (Selenoprotein Z) (SelZ) (TR-beta) (Thioredoxin reductase TR3)	TXNRD2 KIAA1652 TRXR2	Homo sapiens (Human)	524	SUBCELLULAR LOCATION: Mitochondrion {ECO:0000269|PubMed:10215850}.	Mitochondrion
P51398	RT29_HUMAN	reviewed	28S ribosomal protein S29, mitochondrial (MRP-S29) (S29mt) (Death-associated protein 3) (DAP-3) (Ionizing radiation resistance conferring protein) (Mitochondrial small ribosomal subunit protein mS29)	DAP3 MRPS29	Homo sapiens (Human)	398	SUBCELLULAR LOCATION: Mitochondrion {ECO:0000269|PubMed:11162496, ECO:0000269|PubMed:20563667}.	Mitochondrion
Q9H845	ACAD9_HUMAN	reviewed	Acyl-CoA dehydrogenase family member 9, mitochondrial (ACAD-9) (EC 1.3.99.-)	ACAD9	Homo sapiens (Human)	621	SUBCELLULAR LOCATION: Mitochondrion {ECO:0000269|PubMed:20816094}.	Mitochondrion
Q969Z0	TBRG4_HUMAN	reviewed	Protein TBRG4 (Cell cycle progression restoration protein 2) (Cell cycle progression protein 2) (FAST kinase domain-containing protein 4) (Transforming growth factor beta regulator 4)	TBRG4 CPR2 FASTKD4 KIAA0948	Homo sapiens (Human)	631	SUBCELLULAR LOCATION: Mitochondrion {ECO:0000269|PubMed:20869947}.	Mitochondrion
Q4G0N4	NAKD2_HUMAN	reviewed	NAD kinase 2, mitochondrial (EC 2.7.1.23) (Mitochondrial NAD kinase) (NAD kinase domain-containing protein 1, mitochondrial)	NADK2 C5orf33 MNADK NADKD1	Homo sapiens (Human)	442	SUBCELLULAR LOCATION: Mitochondrion {ECO:0000269|PubMed:23212377}.	Mitochondrion
Q9BVL4	SELO_HUMAN	reviewed	Selenoprotein O (SelO)	SELENOO SELO	Homo sapiens (Human)	669	SUBCELLULAR LOCATION: Mitochondrion {ECO:0000269|PubMed:24751718}.	Mitochondrion
Q92552	RT27_HUMAN	reviewed	28S ribosomal protein S27, mitochondrial (MRP-S27) (S27mt) (Mitochondrial small ribosomal subunit protein mS27)	MRPS27 KIAA0264	Homo sapiens (Human)	414	SUBCELLULAR LOCATION: Mitochondrion {ECO:0000269|PubMed:25838379}.	Mitochondrion
Q9NSE4	SYIM_HUMAN	reviewed	Isoleucine--tRNA ligase, mitochondrial (EC 6.1.1.5) (Isoleucyl-tRNA synthetase) (IleRS)	IARS2	Homo sapiens (Human)	1012	SUBCELLULAR LOCATION: Mitochondrion matrix {ECO:0000250}.	Mitochondrion
Q9ULD0	OGDHL_HUMAN	reviewed	2-oxoglutarate dehydrogenase-like, mitochondrial (EC 1.2.4.-) (2-oxoglutarate dehydrogenase complex component E1-like) (OGDC-E1-like) (Alpha-ketoglutarate dehydrogenase-like)	OGDHL KIAA1290	Homo sapiens (Human)	1010	SUBCELLULAR LOCATION: Mitochondrion matrix {ECO:0000250}.	Mitochondrion
A0A024R4B3	A0A024R4B3_HUMAN	unreviewed	NADH dehydrogenase [ubiquinone] 1 alpha subcomplex subunit 10, mitochondrial	NDUFA10 hCG_20530	Homo sapiens (Human)	355	SUBCELLULAR LOCATION: Mitochondrion matrix {ECO:0000256|PIRNR:PIRNR000543}.	Mitochondrion
A0A087WXC5	A0A087WXC5_HUMAN	unreviewed	NADH dehydrogenase [ubiquinone] 1 alpha subcomplex subunit 10, mitochondrial	NDUFA10	Homo sapiens (Human)	355	SUBCELLULAR LOCATION: Mitochondrion matrix {ECO:0000256|PIRNR:PIRNR000543}.	Mitochondrion
A8K413	A8K413_HUMAN	unreviewed	NADH dehydrogenase [ubiquinone] 1 alpha subcomplex subunit 10, mitochondrial		Homo sapiens (Human)	355	SUBCELLULAR LOCATION: Mitochondrion matrix {ECO:0000256|PIRNR:PIRNR000543}.	Mitochondrion
E7ESZ7	E7ESZ7_HUMAN	unreviewed	NADH dehydrogenase [ubiquinone] 1 alpha subcomplex subunit 10, mitochondrial	NDUFA10	Homo sapiens (Human)	390	SUBCELLULAR LOCATION: Mitochondrion matrix {ECO:0000256|PIRNR:PIRNR000543}.	Mitochondrion
Q7Z518	Q7Z518_HUMAN	unreviewed	NADH dehydrogenase [ubiquinone] 1 alpha subcomplex subunit 10, mitochondrial		Homo sapiens (Human)	354	SUBCELLULAR LOCATION: Mitochondrion matrix {ECO:0000256|PIRNR:PIRNR000543}.	Mitochondrion
C9J634	C9J634_HUMAN	unreviewed	Pyruvate dehydrogenase E1 component subunit beta (EC 1.2.4.1)	PDHB	Homo sapiens (Human)	350	SUBCELLULAR LOCATION: Mitochondrion matrix {ECO:0000256|RuleBase:RU364074}.	Mitochondrion
F8WF02	F8WF02_HUMAN	unreviewed	Pyruvate dehydrogenase E1 component subunit beta (EC 1.2.4.1)	PDHB	Homo sapiens (Human)	251	SUBCELLULAR LOCATION: Mitochondrion matrix {ECO:0000256|RuleBase:RU364074}.	Mitochondrion
Q59G68	Q59G68_HUMAN	unreviewed	Pyruvate dehydrogenase E1 component subunit beta (EC 1.2.4.1) (Fragment)		Homo sapiens (Human)	164	SUBCELLULAR LOCATION: Mitochondrion matrix {ECO:0000256|RuleBase:RU364074}.	Mitochondrion
Q9HCC0	MCCB_HUMAN	reviewed	Methylcrotonoyl-CoA carboxylase beta chain, mitochondrial (MCCase subunit beta) (EC 6.4.1.4) (3-methylcrotonyl-CoA carboxylase 2) (3-methylcrotonyl-CoA carboxylase non-biotin-containing subunit) (3-methylcrotonyl-CoA:carbon dioxide ligase subunit beta)	MCCC2 MCCB	Homo sapiens (Human)	563	SUBCELLULAR LOCATION: Mitochondrion matrix {ECO:0000269|PubMed:11170888, ECO:0000269|PubMed:16023992}.	Mitochondrion
Q16795	NDUA9_HUMAN	reviewed	NADH dehydrogenase [ubiquinone] 1 alpha subcomplex subunit 9, mitochondrial (Complex I-39kD) (CI-39kD) (NADH-ubiquinone oxidoreductase 39 kDa subunit)	NDUFA9 NDUFS2L	Homo sapiens (Human)	377	SUBCELLULAR LOCATION: Mitochondrion matrix {ECO:0000305|PubMed:12611891}.	Mitochondrion
Q7L8L6	FAKD5_HUMAN	reviewed	FAST kinase domain-containing protein 5, mitochondrial	FASTKD5 KIAA1792	Homo sapiens (Human)	764	SUBCELLULAR LOCATION: Mitochondrion matrix, mitochondrion nucleoid {ECO:0000269|PubMed:20869947, ECO:0000269|PubMed:25683715}. Note=Localizes to mitochondrial RNA granules found in close proximity to the mitochondrial nucleoids. {ECO:0000269|PubMed:25683715}.	Mitochondrion
P05091	ALDH2_HUMAN	reviewed	Aldehyde dehydrogenase, mitochondrial (EC 1.2.1.3) (ALDH class 2) (ALDH-E2) (ALDHI)	ALDH2 ALDM	Homo sapiens (Human)	517	SUBCELLULAR LOCATION: Mitochondrion matrix.	Mitochondrion
P10515	ODP2_HUMAN	reviewed	Dihydrolipoyllysine-residue acetyltransferase component of pyruvate dehydrogenase complex, mitochondrial (EC 2.3.1.12) (70 kDa mitochondrial autoantigen of primary biliary cirrhosis) (PBC) (Dihydrolipoamide acetyltransferase component of pyruvate dehydrogenase complex) (M2 antigen complex 70 kDa subunit) (Pyruvate dehydrogenase complex component E2) (PDC-E2) (PDCE2)	DLAT DLTA	Homo sapiens (Human)	647	SUBCELLULAR LOCATION: Mitochondrion matrix.	Mitochondrion
P11177	ODPB_HUMAN	reviewed	Pyruvate dehydrogenase E1 component subunit beta, mitochondrial (PDHE1-B) (EC 1.2.4.1)	PDHB PHE1B	Homo sapiens (Human)	359	SUBCELLULAR LOCATION: Mitochondrion matrix.	Mitochondrion
P30837	AL1B1_HUMAN	reviewed	Aldehyde dehydrogenase X, mitochondrial (EC 1.2.1.3) (Aldehyde dehydrogenase 5) (Aldehyde dehydrogenase family 1 member B1)	ALDH1B1 ALDH5 ALDHX	Homo sapiens (Human)	517	SUBCELLULAR LOCATION: Mitochondrion matrix.	Mitochondrion
Q02218	ODO1_HUMAN	reviewed	2-oxoglutarate dehydrogenase, mitochondrial (EC 1.2.4.2) (2-oxoglutarate dehydrogenase complex component E1) (OGDC-E1) (Alpha-ketoglutarate dehydrogenase)	OGDH	Homo sapiens (Human)	1023	SUBCELLULAR LOCATION: Mitochondrion matrix.	Mitochondrion
Q15120	PDK3_HUMAN	reviewed	[Pyruvate dehydrogenase (acetyl-transferring)] kinase isozyme 3, mitochondrial (EC 2.7.11.2) (Pyruvate dehydrogenase kinase isoform 3)	PDK3 PDHK3	Homo sapiens (Human)	406	SUBCELLULAR LOCATION: Mitochondrion matrix.	Mitochondrion
P48735	IDHP_HUMAN	reviewed	Isocitrate dehydrogenase [NADP], mitochondrial (IDH) (EC 1.1.1.42) (ICD-M) (IDP) (NADP(+)-specific ICDH) (Oxalosuccinate decarboxylase)	IDH2	Homo sapiens (Human)	452	SUBCELLULAR LOCATION: Mitochondrion.	Mitochondrion
P50213	IDH3A_HUMAN	reviewed	Isocitrate dehydrogenase [NAD] subunit alpha, mitochondrial (EC 1.1.1.41) (Isocitric dehydrogenase subunit alpha) (NAD(+)-specific ICDH subunit alpha)	IDH3A	Homo sapiens (Human)	366	SUBCELLULAR LOCATION: Mitochondrion.	Mitochondrion
Q9H5Q4	TFB2M_HUMAN	reviewed	Dimethyladenosine transferase 2, mitochondrial (EC 2.1.1.-) (Hepatitis C virus NS5A-transactivated protein 5) (HCV NS5A-transactivated protein 5) (Mitochondrial 12S rRNA dimethylase 2) (Mitochondrial transcription factor B2) (h-mtTFB) (h-mtTFB2) (hTFB2M) (mtTFB2) (S-adenosylmethionine-6-N', N'-adenosyl(rRNA) dimethyltransferase 2)	TFB2M NS5ATP5	Homo sapiens (Human)	396	SUBCELLULAR LOCATION: Mitochondrion.	Mitochondrion
A0A024R3D8	A0A024R3D8_HUMAN	unreviewed	Acetyltransferase component of pyruvate dehydrogenase complex (EC 2.3.1.12)	DLAT hCG_39465	Homo sapiens (Human)	647	SUBCELLULAR LOCATION: Mitochondrion matrix {ECO:0000256|RuleBase:RU361137}.	Mitochondrion
B4DJX1	B4DJX1_HUMAN	unreviewed	Acetyltransferase component of pyruvate dehydrogenase complex (EC 2.3.1.12)		Homo sapiens (Human)	591	SUBCELLULAR LOCATION: Mitochondrion matrix {ECO:0000256|RuleBase:RU361137}.	Mitochondrion
B4DLQ2	B4DLQ2_HUMAN	unreviewed	Acetyltransferase component of pyruvate dehydrogenase complex (EC 2.3.1.12)		Homo sapiens (Human)	428	SUBCELLULAR LOCATION: Mitochondrion matrix {ECO:0000256|RuleBase:RU361137}.	Mitochondrion
E9PEJ4	E9PEJ4_HUMAN	unreviewed	Acetyltransferase component of pyruvate dehydrogenase complex (EC 2.3.1.12)	DLAT	Homo sapiens (Human)	542	SUBCELLULAR LOCATION: Mitochondrion matrix {ECO:0000256|RuleBase:RU361137}.	Mitochondrion
H0YDD4	H0YDD4_HUMAN	unreviewed	Acetyltransferase component of pyruvate dehydrogenase complex (EC 2.3.1.12) (Fragment)	DLAT	Homo sapiens (Human)	479	SUBCELLULAR LOCATION: Mitochondrion matrix {ECO:0000256|RuleBase:RU361137}.	Mitochondrion
Q9NZI8	IF2B1_HUMAN	reviewed	Insulin-like growth factor 2 mRNA-binding protein 1 (IGF2 mRNA-binding protein 1) (IMP-1) (IMP1) (Coding region determinant-binding protein) (CRD-BP) (IGF-II mRNA-binding protein 1) (VICKZ family member 1) (Zipcode-binding protein 1) (ZBP-1)	IGF2BP1 CRDBP VICKZ1 ZBP1	Homo sapiens (Human)	577	SUBCELLULAR LOCATION: Nucleus. Cytoplasm. Cytoplasm, perinuclear region. Cell projection, lamellipodium. Cell projection, dendrite {ECO:0000250}. Cell projection, dendritic spine {ECO:0000250}. Cell projection, growth cone. Cell projection, filopodium {ECO:0000250}. Cell projection, axon {ECO:0000250}. Note=In the nucleus, located in discrete foci, coinciding with the sites of ACTB transcription …	Nucleus
Q00613	HSF1_HUMAN	reviewed	Heat shock factor protein 1 (HSF 1) (Heat shock transcription factor 1) (HSTF 1)	HSF1 HSTF1	Homo sapiens (Human)	529	SUBCELLULAR LOCATION: Nucleus {ECO:0000269|PubMed:10413683, ECO:0000269|PubMed:10747973, ECO:0000269|PubMed:11447121, ECO:0000269|PubMed:11514557, ECO:0000269|PubMed:12665592, ECO:0000269|PubMed:12917326, ECO:0000269|PubMed:14707147, ECO:0000269|PubMed:15661742, ECO:0000269|PubMed:19229036, ECO:0000269|PubMed:21085490, ECO:0000269|PubMed:25963659, ECO:0000269|PubMed:26359349, ECO:0000269|PubMed:2…	Nucleus
P12270	TPR_HUMAN	reviewed	Nucleoprotein TPR (Megator) (NPC-associated intranuclear protein) (Translocated promoter region protein)	TPR	Homo sapiens (Human)	2363	SUBCELLULAR LOCATION: Nucleus {ECO:0000269|PubMed:12802065}. Nucleus membrane {ECO:0000269|PubMed:11514627, ECO:0000269|PubMed:11952838, ECO:0000269|PubMed:18794356, ECO:0000269|PubMed:9024684, ECO:0000269|PubMed:9828100, ECO:0000269|PubMed:9864356}; Peripheral membrane protein {ECO:0000269|PubMed:11514627, ECO:0000269|PubMed:9024684, ECO:0000269|PubMed:9828100, ECO:0000269|PubMed:9864356}; Nucle…	Nucleus
P57740	NU107_HUMAN	reviewed	Nuclear pore complex protein Nup107 (107 kDa nucleoporin) (Nucleoporin Nup107)	NUP107	Homo sapiens (Human)	925	SUBCELLULAR LOCATION: Nucleus membrane {ECO:0000269|PubMed:11564755, ECO:0000269|PubMed:12802065, ECO:0000269|PubMed:15229283, ECO:0000269|PubMed:26411495}. Nucleus, nuclear pore complex {ECO:0000269|PubMed:11564755, ECO:0000269|PubMed:12802065, ECO:0000269|PubMed:15229283, ECO:0000269|PubMed:26411495}. Chromosome, centromere, kinetochore {ECO:0000269|PubMed:11564755}. Note=Located on both the cy…	Nucleus
Q8WUM0	NU133_HUMAN	reviewed	Nuclear pore complex protein Nup133 (133 kDa nucleoporin) (Nucleoporin Nup133)	NUP133	Homo sapiens (Human)	1156	SUBCELLULAR LOCATION: Nucleus, nuclear pore complex {ECO:0000269|PubMed:11564755, ECO:0000269|PubMed:11684705}. Chromosome, centromere, kinetochore {ECO:0000269|PubMed:11564755}. Note=Located on both the cytoplasmic and nuclear sides of the nuclear pore (PubMed:11564755). During mitosis, localizes to the kinetochores (PubMed:11564755). {ECO:0000269|PubMed:11564755, ECO:0000269|PubMed:11684705}.	Nucleus
Q9BW27	NUP85_HUMAN	reviewed	Nuclear pore complex protein Nup85 (85 kDa nucleoporin) (FROUNT) (Nucleoporin Nup75) (Nucleoporin Nup85) (Pericentrin-1)	NUP85 NUP75 PCNT1	Homo sapiens (Human)	656	SUBCELLULAR LOCATION: Nucleus, nuclear pore complex {ECO:0000269|PubMed:12196509, ECO:0000269|PubMed:12718872}. Chromosome, centromere, kinetochore {ECO:0000269|PubMed:12718872, ECO:0000269|PubMed:15146057, ECO:0000269|PubMed:16807356}. Cytoplasm, cytoskeleton, spindle {ECO:0000269|PubMed:16807356}. Cytoplasm {ECO:0000269|PubMed:15995708}. Nucleus membrane {ECO:0000269|PubMed:12196509}. Note=Duri…	Nucleus
Q13362	2A5G_HUMAN	reviewed	Serine/threonine-protein phosphatase 2A 56 kDa regulatory subunit gamma isoform (PP2A B subunit isoform B'-gamma) (PP2A B subunit isoform B56-gamma) (PP2A B subunit isoform PR61-gamma) (PP2A B subunit isoform R5-gamma) (Renal carcinoma antigen NY-REN-29)	PPP2R5C KIAA0044	Homo sapiens (Human)	524	SUBCELLULAR LOCATION: Nucleus. Chromosome, centromere.	Nucleus
Q8N3U4	STAG2_HUMAN	reviewed	Cohesin subunit SA-2 (SCC3 homolog 2) (Stromal antigen 2)	STAG2 SA2	Homo sapiens (Human)	1231	SUBCELLULAR LOCATION: Nucleus. Chromosome. Chromosome, centromere. Note=Associates with chromatin. Before prophase it is scattered along chromosome arms. During prophase, most of cohesin complexes dissociate from chromatin probably because of phosphorylation by PLK1, except at centromeres, where cohesin complexes remain. At anaphase, the RAD21 subunit of cohesin is cleaved, leading to the dissoci…	Nucleus
Q8WVM7	STAG1_HUMAN	reviewed	Cohesin subunit SA-1 (SCC3 homolog 1) (Stromal antigen 1)	STAG1 SA1	Homo sapiens (Human)	1258	SUBCELLULAR LOCATION: Nucleus. Chromosome. Chromosome, centromere. Note=Associates with chromatin. Before prophase it is scattered along chromosome arms. During prophase, most of cohesin complexes dissociate from chromatin probably because of phosphorylation by PLK1, except at centromeres, where cohesin complexes remain. At anaphase, the RAD21 subunit of cohesin is cleaved, leading to the dissoci…	Nucleus
Q96KR1	ZFR_HUMAN	reviewed	Zinc finger RNA-binding protein (hZFR) (M-phase phosphoprotein homolog)	ZFR	Homo sapiens (Human)	1074	SUBCELLULAR LOCATION: Nucleus {ECO:0000250}. Cytoplasm {ECO:0000250}. Cytoplasmic granule {ECO:0000250}. Chromosome {ECO:0000250}. Note=Associated with chromosome foci in meiotic cells. Localizes in somatodendritic compartment of primary hippocampal neurons. Colocalizes with STAU2 in several cytosolic RNA granules (By similarity). {ECO:0000250}.	Nucleus
B0QZK4	B0QZK4_HUMAN	unreviewed	Heterochromatin protein 1-binding protein 3 (Fragment)	HP1BP3	Homo sapiens (Human)	253	SUBCELLULAR LOCATION: Nucleus {ECO:0000256|RuleBase:RU003894}.	Nucleus
Q9Y5B9	SP16H_HUMAN	reviewed	FACT complex subunit SPT16 (Chromatin-specific transcription elongation factor 140 kDa subunit) (FACT 140 kDa subunit) (FACTp140) (Facilitates chromatin transcription complex subunit SPT16) (hSPT16)	SUPT16H FACT140 FACTP140	Homo sapiens (Human)	1047	SUBCELLULAR LOCATION: Nucleus {ECO:0000269|PubMed:10421373}. Chromosome {ECO:0000269|PubMed:10421373}. Note=Colocalizes with RNA polymerase II on chromatin. Recruited to actively transcribed loci.	Nucleus
O95347	SMC2_HUMAN	reviewed	Structural maintenance of chromosomes protein 2 (SMC protein 2) (SMC-2) (Chromosome-associated protein E) (hCAP-E) (XCAP-E homolog)	SMC2 CAPE SMC2L1 PRO0324	Homo sapiens (Human)	1197	SUBCELLULAR LOCATION: Nucleus {ECO:0000269|PubMed:10958694}. Cytoplasm {ECO:0000269|PubMed:10958694}. Chromosome {ECO:0000269|PubMed:10958694}. Note=In interphase cells, the majority of the condensin complex is found in the cytoplasm, while a minority of the complex is associated with chromatin. A subpopulation of the complex however remains associated with chromosome foci in interphase cells. Du…	Nucleus
Q9NTJ3	SMC4_HUMAN	reviewed	Structural maintenance of chromosomes protein 4 (SMC protein 4) (SMC-4) (Chromosome-associated polypeptide C) (hCAP-C) (XCAP-C homolog)	SMC4 CAPC SMC4L1	Homo sapiens (Human)	1288	SUBCELLULAR LOCATION: Nucleus {ECO:0000269|PubMed:10958694}. Cytoplasm {ECO:0000269|PubMed:10958694}. Chromosome {ECO:0000269|PubMed:10958694}. Note=In interphase cells, the majority of the condensin complex is found in the cytoplasm, while a minority of the complex is associated with chromatin. A subpopulation of the complex however remains associated with chromosome foci in interphase cells. Du…	Nucleus
Q5UIP0	RIF1_HUMAN	reviewed	Telomere-associated protein RIF1 (Rap1-interacting factor 1 homolog)	RIF1	Homo sapiens (Human)	2472	SUBCELLULAR LOCATION: Nucleus {ECO:0000269|PubMed:15583028}. Chromosome {ECO:0000250|UniProtKB:Q6PR54}. Chromosome, telomere {ECO:0000269|PubMed:15342490, ECO:0000269|PubMed:15583028}. Cytoplasm, cytoskeleton, spindle {ECO:0000269|PubMed:15583028}. Note=Following interaction with TP53BP1, recruited to sites of DNA damage, such as DSBs (By similarity). Exhibits ATM- and TP53BP1-dependent localizat…	Nucleus
Q96FC9	DDX11_HUMAN	reviewed	ATP-dependent DNA helicase DDX11 (EC 3.6.4.12) (CHL1-related protein 1) (hCHLR1) (DEAD/H-box protein 11) (Keratinocyte growth factor-regulated gene 2 protein) (KRG-2)	DDX11 CHL1 CHLR1 KRG2	Homo sapiens (Human)	970	SUBCELLULAR LOCATION: Nucleus {ECO:0000269|PubMed:17105772}. Nucleus, nucleolus {ECO:0000269|PubMed:17105772, ECO:0000269|PubMed:26089203, ECO:0000269|PubMed:9013641}. Cytoplasm, cytoskeleton, spindle pole {ECO:0000269|PubMed:17105772}. Midbody {ECO:0000269|PubMed:17105772}. Cytoplasm, cytoskeleton, microtubule organizing center, centrosome {ECO:0000269|PubMed:17105772}. Note=During the early sta…	Nucleus
Q93009	UBP7_HUMAN	reviewed	Ubiquitin carboxyl-terminal hydrolase 7 (EC 3.4.19.12) (Deubiquitinating enzyme 7) (Herpesvirus-associated ubiquitin-specific protease) (Ubiquitin thioesterase 7) (Ubiquitin-specific-processing protease 7)	USP7 HAUSP	Homo sapiens (Human)	1102	SUBCELLULAR LOCATION: Nucleus {ECO:0000269|PubMed:23973222, ECO:0000269|PubMed:25283148}. Cytoplasm {ECO:0000269|PubMed:25283148}. Nucleus, PML body {ECO:0000269|PubMed:9034339}. Chromosome {ECO:0000269|PubMed:20601937}. Note=Present in a minority of ND10 nuclear bodies. Association with ICP0/VMW110 at early times of infection leads to an increased proportion of USP7-containing ND10. Colocalizes …	Nucleus
Q5SSJ5	HP1B3_HUMAN	reviewed	Heterochromatin protein 1-binding protein 3 (Protein HP1-BP74)	HP1BP3	Homo sapiens (Human)	553	SUBCELLULAR LOCATION: Nucleus {ECO:0000269|PubMed:24830416}. Chromosome {ECO:0000269|PubMed:20042602, ECO:0000269|PubMed:24830416}. Note=localized in nuclei but not in nucleoli in interphase. Colocalized with chromosomes in mitosis, with a gradually increased during G1 progression and a maximum level during late G1 phase (G1/S). {ECO:0000269|PubMed:24830416}.	Nucleus
Q9H6R4	NOL6_HUMAN	reviewed	Nucleolar protein 6 (Nucleolar RNA-associated protein) (Nrap)	NOL6	Homo sapiens (Human)	1146	SUBCELLULAR LOCATION: Nucleus, nucleolus {ECO:0000269|PubMed:12429849}. Chromosome {ECO:0000250}. Note=Localizes to condensed chromosomes in mitosis. {ECO:0000250}.	Nucleus
Q9BQ67	GRWD1_HUMAN	reviewed	Glutamate-rich WD repeat-containing protein 1	GRWD1 GRWD KIAA1942 WDR28	Homo sapiens (Human)	446	SUBCELLULAR LOCATION: Nucleus, nucleolus {ECO:0000269|PubMed:12429849}. Nucleus {ECO:0000269|PubMed:25990725}. Chromosome {ECO:0000269|PubMed:25990725}. Note=Present in the nucleus throughout interphase and is detached from chromatin at the onset of mitosis and rebinds at telophase when the pre-replication complexes (pre-RC) is formed (PubMed:25990725). {ECO:0000269|PubMed:25990725}.	Nucleus
Q92791	SC65_HUMAN	reviewed	Synaptonemal complex protein SC65 (Leprecan-like protein 4) (Nucleolar autoantigen No55) (Prolyl 3-hydroxylase family member 4)	P3H4 LEPREL4 NOL55 SC65	Homo sapiens (Human)	437	SUBCELLULAR LOCATION: Nucleus, nucleolus {ECO:0000269|PubMed:8862517}. Chromosome {ECO:0000269|PubMed:8862517}. Note=Localized uniformly throughout the granular component of the nucleolus and on the surface of chromosomes during mitosis.	Nucleus
O95983	MBD3_HUMAN	reviewed	Methyl-CpG-binding domain protein 3 (Methyl-CpG-binding protein MBD3)	MBD3	Homo sapiens (Human)	291	SUBCELLULAR LOCATION: Nucleus. Chromosome. Note=Nuclear, in discrete foci. Detected on chromatin, at promoter regions of active genes.	Nucleus
Q9BPX3	CND3_HUMAN	reviewed	Condensin complex subunit 3 (Chromosome-associated protein G) (Condensin subunit CAP-G) (hCAP-G) (Melanoma antigen NY-MEL-3) (Non-SMC condensin I complex subunit G) (XCAP-G homolog)	NCAPG CAPG NYMEL3	Homo sapiens (Human)	1015	SUBCELLULAR LOCATION: Nucleus. Cytoplasm. Chromosome. Note=In interphase cells, the majority of the condensin complex is found in the cytoplasm, while a minority of the complex is associated with chromatin. A subpopulation of the complex however remains associated with chromosome foci in interphase cells. During mitosis, most of the condensin complex is associated with the chromatin. At the onset…	Nucleus
P30876	RPB2_HUMAN	reviewed	DNA-directed RNA polymerase II subunit RPB2 (EC 2.7.7.6) (DNA-directed RNA polymerase II 140 kDa polypeptide) (DNA-directed RNA polymerase II subunit B) (RNA polymerase II subunit 2) (RNA polymerase II subunit B2)	POLR2B	Homo sapiens (Human)	1174	SUBCELLULAR LOCATION: Nucleus {ECO:0000269|PubMed:9852112}.	Nucleus
A0A087WWE2	A0A087WWE2_HUMAN	unreviewed	DNA-directed RNA polymerase subunit (EC 2.7.7.6)	POLR2A	Homo sapiens (Human)	1980		Nucleus
B4DH29	B4DH29_HUMAN	unreviewed	DNA-directed RNA polymerase subunit beta (EC 2.7.7.6)		Homo sapiens (Human)	1099		Nucleus
B4DHJ3	B4DHJ3_HUMAN	unreviewed	DNA-directed RNA polymerase subunit beta (EC 2.7.7.6)		Homo sapiens (Human)	1167		Nucleus
B4DR40	B4DR40_HUMAN	unreviewed	DNA-directed RNA polymerase subunit beta (EC 2.7.7.6)		Homo sapiens (Human)	1083		Nucleus
B4DZE5	B4DZE5_HUMAN	unreviewed	cDNA FLJ58806, highly similar to DNA-directed RNA polymerase, mitochondrial (EC 2.7.7.6)		Homo sapiens (Human)	927		Nucleus
C9J2Y9	C9J2Y9_HUMAN	unreviewed	DNA-directed RNA polymerase subunit beta (EC 2.7.7.6)	POLR2B	Homo sapiens (Human)	1167		Nucleus
C9J4M6	C9J4M6_HUMAN	unreviewed	DNA-directed RNA polymerase subunit beta (EC 2.7.7.6)	POLR2B	Homo sapiens (Human)	1067		Nucleus
Q4G0F4	Q4G0F4_HUMAN	unreviewed	DNA-directed RNA polymerase (EC 2.7.7.6)	POLRMT	Homo sapiens (Human)	1230		Nucleus
Q59E91	Q59E91_HUMAN	unreviewed	DNA-directed RNA polymerase (EC 2.7.7.6) (Fragment)		Homo sapiens (Human)	1072		Nucleus
Q12769	NU160_HUMAN	reviewed	Nuclear pore complex protein Nup160 (160 kDa nucleoporin) (Nucleoporin Nup160)	NUP160 KIAA0197 NUP120	Homo sapiens (Human)	1436	SUBCELLULAR LOCATION: Nucleus, nuclear pore complex {ECO:0000269|PubMed:11564755, ECO:0000269|PubMed:11684705}.	Nucleus
Q9NRG9	AAAS_HUMAN	reviewed	Aladin (Adracalin)	AAAS ADRACALA GL003	Homo sapiens (Human)	546	SUBCELLULAR LOCATION: Nucleus, nuclear pore complex {ECO:0000269|PubMed:19782045}.	Nucleus
Q5SRE5	NU188_HUMAN	reviewed	Nucleoporin NUP188 homolog (hNup188)	NUP188 KIAA0169	Homo sapiens (Human)	1749	SUBCELLULAR LOCATION: Nucleus, nuclear pore complex {ECO:0000305}.	Nucleus
A0A024R9D9	A0A024R9D9_HUMAN	unreviewed	Transcription and mRNA export factor ENY2 (Enhancer of yellow 2 transcription factor homolog)	ENY2 hCG_1781704	Homo sapiens (Human)	101	SUBCELLULAR LOCATION: Nucleus, nucleoplasm {ECO:0000256|HAMAP-Rule:MF_03046}. Nucleus, nuclear pore complex {ECO:0000256|HAMAP-Rule:MF_03046}.	Nucleus
E5RHX8	E5RHX8_HUMAN	unreviewed	Transcription and mRNA export factor ENY2 (Enhancer of yellow 2 transcription factor homolog)	ENY2	Homo sapiens (Human)	100	SUBCELLULAR LOCATION: Nucleus, nucleoplasm {ECO:0000256|HAMAP-Rule:MF_03046}. Nucleus, nuclear pore complex {ECO:0000256|HAMAP-Rule:MF_03046}.	Nucleus
P53041	PPP5_HUMAN	reviewed	Serine/threonine-protein phosphatase 5 (PP5) (EC 3.1.3.16) (Protein phosphatase T) (PP-T) (PPT)	PPP5C PPP5	Homo sapiens (Human)	499	SUBCELLULAR LOCATION: Nucleus {ECO:0000269|PubMed:15383005}. Cytoplasm {ECO:0000269|PubMed:15383005, ECO:0000269|PubMed:19948726}. Cell membrane {ECO:0000269|PubMed:19948726}. Note=Predominantly nuclear (PubMed:15383005). But also present in the cytoplasm (PubMed:15383005). Translocates from the cytoplasm to the plasma membrane in a RAC1-dependent manner (PubMed:19948726). {ECO:0000269|PubMed:153…	Nucleus
Q9H900	ZWILC_HUMAN	reviewed	Protein zwilch homolog (hZwilch)	ZWILCH	Homo sapiens (Human)	591	SUBCELLULAR LOCATION: Chromosome, centromere, kinetochore {ECO:0000269|PubMed:20462495}.	Nucleus
Q8NFH3	NUP43_HUMAN	reviewed	Nucleoporin Nup43 (Nup107-160 subcomplex subunit Nup43) (p42)	NUP43	Homo sapiens (Human)	380	SUBCELLULAR LOCATION: Chromosome, centromere, kinetochore. Nucleus, nuclear pore complex.	Nucleus
Q8NFH4	NUP37_HUMAN	reviewed	Nucleoporin Nup37 (p37) (Nup107-160 subcomplex subunit Nup37)	NUP37	Homo sapiens (Human)	326	SUBCELLULAR LOCATION: Chromosome, centromere, kinetochore. Nucleus, nuclear pore complex.	Nucleus
Q7Z460	CLAP1_HUMAN	reviewed	CLIP-associating protein 1 (Cytoplasmic linker-associated protein 1) (Multiple asters homolog 1) (Protein Orbit homolog 1) (hOrbit1)	CLASP1 KIAA0622 MAST1	Homo sapiens (Human)	1538	SUBCELLULAR LOCATION: Cytoplasm, cytoskeleton. Cytoplasm, cytoskeleton, microtubule organizing center, centrosome. Chromosome, centromere, kinetochore. Cytoplasm, cytoskeleton, spindle. Golgi apparatus, trans-Golgi network {ECO:0000305}. Note=Localizes to microtubule plus ends. Localizes to centrosomes, kinetochores and the mitotic spindle from prometaphase. Subsequently localizes to the spindle …	Nucleus
Q9Y4R8	TELO2_HUMAN	reviewed	Telomere length regulation protein TEL2 homolog (Protein clk-2 homolog) (hCLK2)	TELO2 KIAA0683	Homo sapiens (Human)	837	SUBCELLULAR LOCATION: Cytoplasm. Membrane. Nucleus. Chromosome, telomere {ECO:0000305}.	Nucleus
P46060	RAGP1_HUMAN	reviewed	Ran GTPase-activating protein 1 (RanGAP1)	RANGAP1 KIAA1835 SD	Homo sapiens (Human)	587	SUBCELLULAR LOCATION: Cytoplasm. Nucleus membrane; Peripheral membrane protein; Cytoplasmic side. Chromosome, centromere, kinetochore {ECO:0000250}. Cytoplasm, cytoskeleton, spindle pole {ECO:0000250}. Note=Cytoplasmic during interphase. Targeted to the nuclear rim after sumoylation. During mitosis, associates with mitotic spindles. Association with kinetochores appears soon after nuclear envelop…	Nucleus
O60566	BUB1B_HUMAN	reviewed	Mitotic checkpoint serine/threonine-protein kinase BUB1 beta (EC 2.7.11.1) (MAD3/BUB1-related protein kinase) (hBUBR1) (Mitotic checkpoint kinase MAD3L) (Protein SSK1)	BUB1B BUBR1 MAD3L SSK1	Homo sapiens (Human)	1050	SUBCELLULAR LOCATION: Cytoplasm. Nucleus. Chromosome, centromere, kinetochore. Cytoplasm, cytoskeleton, microtubule organizing center, centrosome. Note=Cytoplasmic in interphase cells. Associates with the kinetochores in early prophase. Kinetochore localization requires BUB1, PLK1 and KNL1.	Nucleus
P31483	TIA1_HUMAN	reviewed	Nucleolysin TIA-1 isoform p40 (RNA-binding protein TIA-1) (T-cell-restricted intracellular antigen-1) (TIA-1) (p40-TIA-1)	TIA1	Homo sapiens (Human)	386	SUBCELLULAR LOCATION: Cytoplasmic granule {ECO:0000269|PubMed:15371533}. Nucleus {ECO:0000269|PubMed:15371533, ECO:0000305|PubMed:18201561}. Note=Accumulates in cytoplasmic stress granules (SG) following cellular damage. {ECO:0000269|PubMed:15371533}.	Nucleus
P55263	ADK_HUMAN	reviewed	Adenosine kinase (AK) (EC 2.7.1.20) (Adenosine 5'-phosphotransferase)	ADK	Homo sapiens (Human)	362	SUBCELLULAR LOCATION: Isoform 1: Nucleus {ECO:0000269|PubMed:19635462}.; SUBCELLULAR LOCATION: Isoform 2: Cytoplasm {ECO:0000269|PubMed:19635462}.	Nucleus
Q92688	AN32B_HUMAN	reviewed	Acidic leucine-rich nuclear phosphoprotein 32 family member B (Acidic protein rich in leucines) (Putative HLA-DR-associated protein I-2) (PHAPI2) (Silver-stainable protein SSP29)	ANP32B APRIL PHAPI2	Homo sapiens (Human)	251	SUBCELLULAR LOCATION: Isoform 1: Nucleus. Note=Accumulates in the nuclei at the S phase. {ECO:0000250}.; SUBCELLULAR LOCATION: Isoform 2: Cytoplasm. Note=Lacks a nuclear localization signal.	Nucleus
Q7Z5K2	WAPL_HUMAN	reviewed	Wings apart-like protein homolog (Friend of EBNA2 protein) (WAPL cohesin release factor)	WAPL FOE KIAA0261 WAPAL	Homo sapiens (Human)	1190	SUBCELLULAR LOCATION: Isoform 2: Nucleus.; SUBCELLULAR LOCATION: Nucleus. Chromosome. Cytoplasm. Note=Associates with chromatin through the cohesin complex during interphase. Released in the cytoplasm from nuclear envelope breakdown until anaphase, it reaccumulates in nucleus at telophase.	Nucleus
O60502	OGA_HUMAN	reviewed	Protein O-GlcNAcase (OGA) (EC 3.2.1.169) (Beta-N-acetylglucosaminidase) (EC 3.2.1.-) (Beta-N-acetylhexosaminidase) (Beta-hexosaminidase) (Meningioma-expressed antigen 5) (N-acetyl-beta-D-glucosaminidase) (N-acetyl-beta-glucosaminidase) (Nuclear cytoplasmic O-GlcNAcase and acetyltransferase) (NCOAT)	MGEA5 HEXC KIAA0679 MEA5	Homo sapiens (Human)	916	SUBCELLULAR LOCATION: Isoform 3: Nucleus {ECO:0000269|PubMed:11341771}.; SUBCELLULAR LOCATION: Isoform 1: Cytoplasm {ECO:0000269|PubMed:11148210, ECO:0000269|PubMed:11341771, ECO:0000269|PubMed:11788610}.	Nucleus
O14929	HAT1_HUMAN	reviewed	Histone acetyltransferase type B catalytic subunit (EC 2.3.1.48) (Histone acetyltransferase 1)	HAT1 KAT1	Homo sapiens (Human)	419	SUBCELLULAR LOCATION: Isoform A: Nucleus matrix.; SUBCELLULAR LOCATION: Isoform B: Cytoplasm. Nucleus. Nucleus matrix. Nucleus, nucleoplasm. Note=Localization is predominantly nuclear in normal cells. Treatment with hydrogen peroxide or ionizing radiation enhances nuclear localization through redistribution of existing protein.	Nucleus
Q1KMD3	HNRL2_HUMAN	reviewed	Heterogeneous nuclear ribonucleoprotein U-like protein 2 (Scaffold-attachment factor A2) (SAF-A2)	HNRNPUL2 HNRPUL2	Homo sapiens (Human)	747	SUBCELLULAR LOCATION: Nucleus {ECO:0000250|UniProtKB:Q00PI9}.	Nucleus
P33991	MCM4_HUMAN	reviewed	DNA replication licensing factor MCM4 (EC 3.6.4.12) (CDC21 homolog) (P1-CDC21)	MCM4 CDC21	Homo sapiens (Human)	863	SUBCELLULAR LOCATION: Nucleus {ECO:0000250}.	Nucleus
Q15459	SF3A1_HUMAN	reviewed	Splicing factor 3A subunit 1 (SF3a120) (Spliceosome-associated protein 114) (SAP 114)	SF3A1 SAP114	Homo sapiens (Human)	793	SUBCELLULAR LOCATION: Nucleus {ECO:0000250}.	Nucleus
Q6KC79	NIPBL_HUMAN	reviewed	Nipped-B-like protein (Delangin) (SCC2 homolog)	NIPBL IDN3	Homo sapiens (Human)	2804	SUBCELLULAR LOCATION: Nucleus {ECO:0000250}.	Nucleus
Q92771	DDX12_HUMAN	reviewed	Putative ATP-dependent RNA helicase DDX12 (EC 3.6.4.13) (CHL1-related protein 2) (hCHLR2) (DEAD/H box protein 12)	DDX12P CHLR2 DDX12	Homo sapiens (Human)	950	SUBCELLULAR LOCATION: Nucleus {ECO:0000250}.	Nucleus
Q96E39	RMXL1_HUMAN	reviewed	RNA binding motif protein, X-linked-like-1 (Heterogeneous nuclear ribonucleoprotein G-like 1)	RBMXL1	Homo sapiens (Human)	390	SUBCELLULAR LOCATION: Nucleus {ECO:0000250}.	Nucleus
Q96F45	ZN503_HUMAN	reviewed	Zinc finger protein 503	ZNF503 NOLZ1	Homo sapiens (Human)	646	SUBCELLULAR LOCATION: Nucleus {ECO:0000250}.	Nucleus
Q9H0L4	CSTFT_HUMAN	reviewed	Cleavage stimulation factor subunit 2 tau variant (CF-1 64 kDa subunit tau variant) (Cleavage stimulation factor 64 kDa subunit tau variant) (CSTF 64 kDa subunit tau variant) (TauCstF-64)	CSTF2T KIAA0689	Homo sapiens (Human)	616	SUBCELLULAR LOCATION: Nucleus {ECO:0000250}.	Nucleus
P51991	ROA3_HUMAN	reviewed	Heterogeneous nuclear ribonucleoprotein A3 (hnRNP A3)	HNRNPA3 HNRPA3	Homo sapiens (Human)	378	SUBCELLULAR LOCATION: Nucleus {ECO:0000250}. Note=Component of ribonucleosomes.	Nucleus
Q9HCS7	SYF1_HUMAN	reviewed	Pre-mRNA-splicing factor SYF1 (Protein HCNP) (XPA-binding protein 2)	XAB2 HCNP KIAA1177 SYF1 PP3898	Homo sapiens (Human)	855	SUBCELLULAR LOCATION: Nucleus {ECO:0000250}. Note=Detected in the splicing complex carrying pre-mRNA. {ECO:0000250}.	Nucleus
Q13435	SF3B2_HUMAN	reviewed	Splicing factor 3B subunit 2 (Pre-mRNA-splicing factor SF3b 145 kDa subunit) (SF3b145) (SF3b150) (Spliceosome-associated protein 145) (SAP 145)	SF3B2 SAP145	Homo sapiens (Human)	895	SUBCELLULAR LOCATION: Nucleus {ECO:0000250}. Nucleus speckle {ECO:0000269|PubMed:16923959}.	Nucleus
O00470	MEIS1_HUMAN	reviewed	Homeobox protein Meis1	MEIS1	Homo sapiens (Human)	390	SUBCELLULAR LOCATION: Nucleus {ECO:0000255|PROSITE-ProRule:PRU00108}.	Nucleus
Q9H2P0	ADNP_HUMAN	reviewed	Activity-dependent neuroprotector homeobox protein (Activity-dependent neuroprotective protein)	ADNP ADNP1 KIAA0784	Homo sapiens (Human)	1102	SUBCELLULAR LOCATION: Nucleus {ECO:0000255|PROSITE-ProRule:PRU00108}.	Nucleus
A8K984	A8K984_HUMAN	unreviewed	Structural maintenance of chromosomes protein		Homo sapiens (Human)	1197	SUBCELLULAR LOCATION: Nucleus {ECO:0000256|PIRNR:PIRNR005719}.	Nucleus
B3KMB1	B3KMB1_HUMAN	unreviewed	Structural maintenance of chromosomes protein		Homo sapiens (Human)	1197	SUBCELLULAR LOCATION: Nucleus {ECO:0000256|PIRNR:PIRNR005719}.	Nucleus
B3KXX5	B3KXX5_HUMAN	unreviewed	Structural maintenance of chromosomes protein		Homo sapiens (Human)	1263	SUBCELLULAR LOCATION: Nucleus {ECO:0000256|PIRNR:PIRNR005719}.	Nucleus
B7ZLZ7	B7ZLZ7_HUMAN	unreviewed	Structural maintenance of chromosomes protein	SMC2	Homo sapiens (Human)	1197	SUBCELLULAR LOCATION: Nucleus {ECO:0000256|PIRNR:PIRNR005719}.	Nucleus
E9PD53	E9PD53_HUMAN	unreviewed	Structural maintenance of chromosomes protein	SMC4	Homo sapiens (Human)	1263	SUBCELLULAR LOCATION: Nucleus {ECO:0000256|PIRNR:PIRNR005719}.	Nucleus
B4DN49	B4DN49_HUMAN	unreviewed	DNA mismatch repair protein		Homo sapiens (Human)	865	SUBCELLULAR LOCATION: Nucleus {ECO:0000256|PIRNR:PIRNR005813}.	Nucleus
E9PHA6	E9PHA6_HUMAN	unreviewed	DNA mismatch repair protein	MSH2	Homo sapiens (Human)	921	SUBCELLULAR LOCATION: Nucleus {ECO:0000256|PIRNR:PIRNR005813}.	Nucleus
Q53FK0	Q53FK0_HUMAN	unreviewed	DNA mismatch repair protein (Fragment)		Homo sapiens (Human)	878	SUBCELLULAR LOCATION: Nucleus {ECO:0000256|PIRNR:PIRNR005813}.	Nucleus
Q53GS1	Q53GS1_HUMAN	unreviewed	DNA mismatch repair protein (Fragment)		Homo sapiens (Human)	878	SUBCELLULAR LOCATION: Nucleus {ECO:0000256|PIRNR:PIRNR005813}.	Nucleus
B4DUS0	B4DUS0_HUMAN	unreviewed	BRCA2 and CDKN1A-interacting protein		Homo sapiens (Human)	290	SUBCELLULAR LOCATION: Nucleus {ECO:0000256|PIRNR:PIRNR028983}.	Nucleus
B4E318	B4E318_HUMAN	unreviewed	BRCA2 and CDKN1A-interacting protein		Homo sapiens (Human)	262	SUBCELLULAR LOCATION: Nucleus {ECO:0000256|PIRNR:PIRNR028983}.	Nucleus
B4DVS0	B4DVS0_HUMAN	unreviewed	Small nuclear ribonucleoprotein-associated protein	SNRPB hCG_2039421	Homo sapiens (Human)	234	SUBCELLULAR LOCATION: Nucleus {ECO:0000256|PIRNR:PIRNR037187}.	Nucleus
Q15182	Q15182_HUMAN	unreviewed	Small nuclear ribonucleoprotein-associated protein	SNRPB	Homo sapiens (Human)	285	SUBCELLULAR LOCATION: Nucleus {ECO:0000256|PIRNR:PIRNR037187}.	Nucleus
Q5XPV6	Q5XPV6_HUMAN	unreviewed	Small nuclear ribonucleoprotein-associated protein		Homo sapiens (Human)	231	SUBCELLULAR LOCATION: Nucleus {ECO:0000256|PIRNR:PIRNR037187}.	Nucleus
Q66K91	Q66K91_HUMAN	unreviewed	Small nuclear ribonucleoprotein-associated protein	SNRPB hCG_2039421	Homo sapiens (Human)	231	SUBCELLULAR LOCATION: Nucleus {ECO:0000256|PIRNR:PIRNR037187}.	Nucleus
A0A024R7E3	A0A024R7E3_HUMAN	unreviewed	DNA (cytosine-5)-methyltransferase (EC 2.1.1.37)	DNMT1 hCG_28474	Homo sapiens (Human)	1678	SUBCELLULAR LOCATION: Nucleus {ECO:0000256|PIRNR:PIRNR037404}.	Nucleus
B3KUJ5	B3KUJ5_HUMAN	unreviewed	Histone deacetylase (EC 3.5.1.98)		Homo sapiens (Human)	458	SUBCELLULAR LOCATION: Nucleus {ECO:0000256|PIRNR:PIRNR037913, ECO:0000256|SAAS:SAAS00818221}.	Nucleus
B5BU61	B5BU61_HUMAN	unreviewed	Histone deacetylase (EC 3.5.1.98)	HDAC1	Homo sapiens (Human)	482	SUBCELLULAR LOCATION: Nucleus {ECO:0000256|PIRNR:PIRNR037913, ECO:0000256|SAAS:SAAS00818221}.	Nucleus
Q6IT96	Q6IT96_HUMAN	unreviewed	Histone deacetylase (EC 3.5.1.98)	HDAC1 hCG_41610	Homo sapiens (Human)	482	SUBCELLULAR LOCATION: Nucleus {ECO:0000256|PIRNR:PIRNR037913, ECO:0000256|SAAS:SAAS00818221}.	Nucleus
A0A087X2B1	A0A087X2B1_HUMAN	unreviewed	RNA binding protein fox-1 homolog	RBFOX1	Homo sapiens (Human)	375	SUBCELLULAR LOCATION: Nucleus {ECO:0000256|PIRNR:PIRNR037932}.	Nucleus
B0QYV1	B0QYV1_HUMAN	unreviewed	RNA binding protein fox-1 homolog	RBFOX2	Homo sapiens (Human)	357	SUBCELLULAR LOCATION: Nucleus {ECO:0000256|PIRNR:PIRNR037932}.	Nucleus
B0QYY4	B0QYY4_HUMAN	unreviewed	RNA binding protein fox-1 homolog	RBFOX2	Homo sapiens (Human)	370	SUBCELLULAR LOCATION: Nucleus {ECO:0000256|PIRNR:PIRNR037932}.	Nucleus
B7Z1U7	B7Z1U7_HUMAN	unreviewed	RNA binding protein fox-1 homolog	RBFOX1	Homo sapiens (Human)	425	SUBCELLULAR LOCATION: Nucleus {ECO:0000256|PIRNR:PIRNR037932}.	Nucleus
J3KNW3	J3KNW3_HUMAN	unreviewed	RNA binding protein fox-1 homolog	RBFOX1	Homo sapiens (Human)	402	SUBCELLULAR LOCATION: Nucleus {ECO:0000256|PIRNR:PIRNR037932}.	Nucleus
X5D7T5	X5D7T5_HUMAN	unreviewed	RNA binding protein fox-1 homolog	RBFOX1	Homo sapiens (Human)	394	SUBCELLULAR LOCATION: Nucleus {ECO:0000256|PIRNR:PIRNR037932}.	Nucleus
X5DP44	X5DP44_HUMAN	unreviewed	RNA binding protein fox-1 homolog	RBFOX1	Homo sapiens (Human)	367	SUBCELLULAR LOCATION: Nucleus {ECO:0000256|PIRNR:PIRNR037932}.	Nucleus
B2RBM8	B2RBM8_HUMAN	unreviewed	cDNA, FLJ95596, highly similar to Homo sapiens activity-dependent neuroprotector (ADNP), mRNA		Homo sapiens (Human)	1102	SUBCELLULAR LOCATION: Nucleus {ECO:0000256|PROSITE-ProRule:PRU00108, ECO:0000256|RuleBase:RU000682}.	Nucleus
Q6DHZ8	Q6DHZ8_HUMAN	unreviewed	Activity-dependent neuroprotector homeobox	ADNP	Homo sapiens (Human)	1102	SUBCELLULAR LOCATION: Nucleus {ECO:0000256|PROSITE-ProRule:PRU00108, ECO:0000256|RuleBase:RU000682}.	Nucleus
A0A024R9I7	A0A024R9I7_HUMAN	unreviewed	Meis1, myeloid ecotropic viral integration site 1 homolog 2 (Mouse), isoform CRA_e	MEIS2 hCG_39301	Homo sapiens (Human)	337	SUBCELLULAR LOCATION: Nucleus {ECO:0000256|PROSITE-ProRule:PRU00108, ECO:0000256|SAAS:SAAS00759028}.	Nucleus
A0A024R9L4	A0A024R9L4_HUMAN	unreviewed	Meis1, myeloid ecotropic viral integration site 1 homolog 2 (Mouse), isoform CRA_b	MEIS2 hCG_39301	Homo sapiens (Human)	470	SUBCELLULAR LOCATION: Nucleus {ECO:0000256|PROSITE-ProRule:PRU00108, ECO:0000256|SAAS:SAAS00759028}.	Nucleus
B2RC57	B2RC57_HUMAN	unreviewed	cDNA, FLJ95861, highly similar to Homo sapiens Meis1, myeloid ecotropic viral integration site 1homolog (mouse) (MEIS1), mRNA		Homo sapiens (Human)	390	SUBCELLULAR LOCATION: Nucleus {ECO:0000256|PROSITE-ProRule:PRU00108, ECO:0000256|SAAS:SAAS00759028}.	Nucleus
B3KPD8	B3KPD8_HUMAN	unreviewed	cDNA FLJ31654 fis, clone NT2RI2004230, highly similar to Homeobox protein Meis2		Homo sapiens (Human)	388	SUBCELLULAR LOCATION: Nucleus {ECO:0000256|PROSITE-ProRule:PRU00108, ECO:0000256|SAAS:SAAS00759028}.	Nucleus
B7Z272	B7Z272_HUMAN	unreviewed	cDNA FLJ55195, highly similar to Homeobox protein Meis2		Homo sapiens (Human)	334	SUBCELLULAR LOCATION: Nucleus {ECO:0000256|PROSITE-ProRule:PRU00108, ECO:0000256|SAAS:SAAS00759028}.	Nucleus
B7Z4B3	B7Z4B3_HUMAN	unreviewed	cDNA FLJ54698, highly similar to Homeobox protein Meis1		Homo sapiens (Human)	325	SUBCELLULAR LOCATION: Nucleus {ECO:0000256|PROSITE-ProRule:PRU00108, ECO:0000256|SAAS:SAAS00759028}.	Nucleus
B7Z6F6	B7Z6F6_HUMAN	unreviewed	cDNA FLJ58324, highly similar to Homeobox protein Meis2		Homo sapiens (Human)	457	SUBCELLULAR LOCATION: Nucleus {ECO:0000256|PROSITE-ProRule:PRU00108, ECO:0000256|SAAS:SAAS00759028}.	Nucleus
F5GYS8	F5GYS8_HUMAN	unreviewed	Homeobox protein Meis1	MEIS1	Homo sapiens (Human)	325	SUBCELLULAR LOCATION: Nucleus {ECO:0000256|PROSITE-ProRule:PRU00108, ECO:0000256|SAAS:SAAS00759028}.	Nucleus
H0YNY8	H0YNY8_HUMAN	unreviewed	Homeobox protein Meis1	MEIS1	Homo sapiens (Human)	370	SUBCELLULAR LOCATION: Nucleus {ECO:0000256|PROSITE-ProRule:PRU00108, ECO:0000256|SAAS:SAAS00759028}.	Nucleus
U3KPR8	U3KPR8_HUMAN	unreviewed	Homeobox protein Meis1 (Meis1, myeloid ecotropic viral integration site 1 homolog (Mouse), isoform CRA_b)	MEIS1 hCG_1818196	Homo sapiens (Human)	378	SUBCELLULAR LOCATION: Nucleus {ECO:0000256|PROSITE-ProRule:PRU00108, ECO:0000256|SAAS:SAAS00759028}.	Nucleus
A0A024R126	A0A024R126_HUMAN	unreviewed	Nuclear receptor subfamily 4, group A, member 1, isoform CRA_d	NR4A1 hCG_37966	Homo sapiens (Human)	598	SUBCELLULAR LOCATION: Nucleus {ECO:0000256|PROSITE-ProRule:PRU00407, ECO:0000256|RuleBase:RU004334, ECO:0000256|SAAS:SAAS00817906}.	Nucleus
B6ZGU6	B6ZGU6_HUMAN	unreviewed	Glucocorticoid receptor	NR3C1	Homo sapiens (Human)	777	SUBCELLULAR LOCATION: Nucleus {ECO:0000256|PROSITE-ProRule:PRU00407, ECO:0000256|RuleBase:RU004334, ECO:0000256|SAAS:SAAS00817906}.	Nucleus
E5KQF5	E5KQF5_HUMAN	unreviewed	Glucocorticoid receptor (Nuclear receptor subfamily 3, group C, member 1 (Glucocorticoid receptor), isoform CRA_b)	NR3C1 hCG_37601	Homo sapiens (Human)	742	SUBCELLULAR LOCATION: Nucleus {ECO:0000256|PROSITE-ProRule:PRU00407, ECO:0000256|RuleBase:RU004334, ECO:0000256|SAAS:SAAS00817906}.	Nucleus
E5KQF6	E5KQF6_HUMAN	unreviewed	Glucocorticoid receptor (Nuclear receptor subfamily 3, group C, member 1 (Glucocorticoid receptor), isoform CRA_a)	NR3C1 hCG_37601	Homo sapiens (Human)	778	SUBCELLULAR LOCATION: Nucleus {ECO:0000256|PROSITE-ProRule:PRU00407, ECO:0000256|RuleBase:RU004334, ECO:0000256|SAAS:SAAS00817906}.	Nucleus
F1D8R0	F1D8R0_HUMAN	unreviewed	Nuclear receptor subfamily 2, group F, member 2, isoform CRA_a (Ovalbumin upstream promoter-transcription factor II variant 1)	NR2F2 hCG_21309	Homo sapiens (Human)	414	SUBCELLULAR LOCATION: Nucleus {ECO:0000256|PROSITE-ProRule:PRU00407, ECO:0000256|RuleBase:RU004334, ECO:0000256|SAAS:SAAS00817906}.	Nucleus
F1DAL6	F1DAL6_HUMAN	unreviewed	Ovalbumin upstream promoter-transcription factor I	NR2F1	Homo sapiens (Human)	397	SUBCELLULAR LOCATION: Nucleus {ECO:0000256|PROSITE-ProRule:PRU00407, ECO:0000256|RuleBase:RU004334, ECO:0000256|SAAS:SAAS00817906}.	Nucleus
F1DAL7	F1DAL7_HUMAN	unreviewed	Ovalbumin upstream promoter-transcription factor I	NR2F1	Homo sapiens (Human)	372	SUBCELLULAR LOCATION: Nucleus {ECO:0000256|PROSITE-ProRule:PRU00407, ECO:0000256|RuleBase:RU004334, ECO:0000256|SAAS:SAAS00817906}.	Nucleus
F1DAL8	F1DAL8_HUMAN	unreviewed	Ovalbumin upstream promoter-transcription factor I	NR2F1	Homo sapiens (Human)	382	SUBCELLULAR LOCATION: Nucleus {ECO:0000256|PROSITE-ProRule:PRU00407, ECO:0000256|RuleBase:RU004334, ECO:0000256|SAAS:SAAS00817906}.	Nucleus
F1DAL9	F1DAL9_HUMAN	unreviewed	COUP transcription factor 1 (Ovalbumin upstream promoter-transcription factor I)	NR2F1	Homo sapiens (Human)	398	SUBCELLULAR LOCATION: Nucleus {ECO:0000256|PROSITE-ProRule:PRU00407, ECO:0000256|RuleBase:RU004334, ECO:0000256|SAAS:SAAS00817906}.	Nucleus
F5GXF0	F5GXF0_HUMAN	unreviewed	Nuclear receptor subfamily 4 group A member 1	NR4A1	Homo sapiens (Human)	652	SUBCELLULAR LOCATION: Nucleus {ECO:0000256|PROSITE-ProRule:PRU00407, ECO:0000256|RuleBase:RU004334, ECO:0000256|SAAS:SAAS00817906}.	Nucleus
H6V745	H6V745_HUMAN	unreviewed	Glucocorticoid receptor	NR3C1	Homo sapiens (Human)	745	SUBCELLULAR LOCATION: Nucleus {ECO:0000256|PROSITE-ProRule:PRU00407, ECO:0000256|RuleBase:RU004334, ECO:0000256|SAAS:SAAS00817906}.	Nucleus
Q6ZMM6	Q6ZMM6_HUMAN	unreviewed	cDNA FLJ16818 fis, clone TRACH1000193, highly similar to Orphan nuclear receptor HMR		Homo sapiens (Human)	652	SUBCELLULAR LOCATION: Nucleus {ECO:0000256|PROSITE-ProRule:PRU00407, ECO:0000256|RuleBase:RU004334, ECO:0000256|SAAS:SAAS00817906}.	Nucleus
Q8N3V2	Q8N3V2_HUMAN	unreviewed	Uncharacterized protein DKFZp451G125	DKFZp451G125	Homo sapiens (Human)	598	SUBCELLULAR LOCATION: Nucleus {ECO:0000256|PROSITE-ProRule:PRU00407, ECO:0000256|RuleBase:RU004334, ECO:0000256|SAAS:SAAS00817906}.	Nucleus
F5ATB8	F5ATB8_HUMAN	unreviewed	Nuclear receptor subfamily 3 group C member 1 variant DL-1	NR3C1	Homo sapiens (Human)	662	SUBCELLULAR LOCATION: Nucleus {ECO:0000256|PROSITE-ProRule:PRU00407, ECO:0000256|SAAS:SAAS00586772}.	Nucleus
A0A0A0VEB4	A0A0A0VEB4_HUMAN	unreviewed	GTF2I-RARA fusion protein	GTF2I-RARA	Homo sapiens (Human)	598	SUBCELLULAR LOCATION: Nucleus {ECO:0000256|PROSITE-ProRule:PRU00484, ECO:0000256|RuleBase:RU004334, ECO:0000256|SAAS:SAAS00817906}.	Nucleus
A8K9W7	A8K9W7_HUMAN	unreviewed	cDNA FLJ77440, highly similar to Homo sapiens general transcription factor II, i (GTF2I), transcript variant 2, mRNA		Homo sapiens (Human)	978	SUBCELLULAR LOCATION: Nucleus {ECO:0000256|PROSITE-ProRule:PRU00484}.	Nucleus
B4DH52	B4DH52_HUMAN	unreviewed	cDNA FLJ55916, highly similar to General transcription factor II-I		Homo sapiens (Human)	993	SUBCELLULAR LOCATION: Nucleus {ECO:0000256|PROSITE-ProRule:PRU00484}.	Nucleus
B4DRA9	B4DRA9_HUMAN	unreviewed	cDNA FLJ61347, highly similar to General transcription factor II-I		Homo sapiens (Human)	530	SUBCELLULAR LOCATION: Nucleus {ECO:0000256|PROSITE-ProRule:PRU00484}.	Nucleus
Q499G6	Q499G6_HUMAN	unreviewed	General transcription factor II, i	GTF2I	Homo sapiens (Human)	976	SUBCELLULAR LOCATION: Nucleus {ECO:0000256|PROSITE-ProRule:PRU00484}.	Nucleus
X5D2J9	X5D2J9_HUMAN	unreviewed	General transcription factor IIi isoform D (Fragment)	GTF2I	Homo sapiens (Human)	957	SUBCELLULAR LOCATION: Nucleus {ECO:0000256|PROSITE-ProRule:PRU00484}.	Nucleus
X5D7Q9	X5D7Q9_HUMAN	unreviewed	General transcription factor IIi isoform E (Fragment)	GTF2I	Homo sapiens (Human)	300	SUBCELLULAR LOCATION: Nucleus {ECO:0000256|PROSITE-ProRule:PRU00484}.	Nucleus
X5D939	X5D939_HUMAN	unreviewed	General transcription factor IIi isoform C (Fragment)	GTF2I	Homo sapiens (Human)	977	SUBCELLULAR LOCATION: Nucleus {ECO:0000256|PROSITE-ProRule:PRU00484}.	Nucleus
X5DNP5	X5DNP5_HUMAN	unreviewed	General transcription factor IIi isoform B (Fragment)	GTF2I	Homo sapiens (Human)	978	SUBCELLULAR LOCATION: Nucleus {ECO:0000256|PROSITE-ProRule:PRU00484}.	Nucleus
X5DR09	X5DR09_HUMAN	unreviewed	General transcription factor IIi isoform A (Fragment)	GTF2I	Homo sapiens (Human)	998	SUBCELLULAR LOCATION: Nucleus {ECO:0000256|PROSITE-ProRule:PRU00484}.	Nucleus
E5RIS7	E5RIS7_HUMAN	unreviewed	Transcription elongation factor A protein 1	TCEA1	Homo sapiens (Human)	111	SUBCELLULAR LOCATION: Nucleus {ECO:0000256|PROSITE-ProRule:PRU00649}.	Nucleus
E5RJ93	E5RJ93_HUMAN	unreviewed	Transcription elongation factor A protein 1	TCEA1	Homo sapiens (Human)	90	SUBCELLULAR LOCATION: Nucleus {ECO:0000256|PROSITE-ProRule:PRU00649}.	Nucleus
A0A024R4F4	A0A024R4F4_HUMAN	unreviewed	DNA polymerase (EC 2.7.7.7)	POLD1 hCG_22928	Homo sapiens (Human)	1107	SUBCELLULAR LOCATION: Nucleus {ECO:0000256|RuleBase:RU000442}.	Nucleus
M0R2B7	M0R2B7_HUMAN	unreviewed	DNA polymerase (EC 2.7.7.7)	POLD1	Homo sapiens (Human)	1133	SUBCELLULAR LOCATION: Nucleus {ECO:0000256|RuleBase:RU000442}.	Nucleus
Q308M6	Q308M6_HUMAN	unreviewed	DNA polymerase (EC 2.7.7.7)		Homo sapiens (Human)	1133	SUBCELLULAR LOCATION: Nucleus {ECO:0000256|RuleBase:RU000442}.	Nucleus
F8VSE7	F8VSE7_HUMAN	unreviewed	Transcription factor E2F7 (Fragment)	E2F7	Homo sapiens (Human)	693	SUBCELLULAR LOCATION: Nucleus {ECO:0000256|RuleBase:RU003796}.	Nucleus
B2R8X4	B2R8X4_HUMAN	unreviewed	cDNA, FLJ94105, highly similar to Homo sapiens GA binding protein transcription factor, alpha subunit 60kDa (GABPA), mRNA		Homo sapiens (Human)	454	SUBCELLULAR LOCATION: Nucleus {ECO:0000256|RuleBase:RU004019, ECO:0000256|SAAS:SAAS00594387}.	Nucleus
C1IK54	C1IK54_HUMAN	unreviewed	DEAD box polypeptide 5/ets variant protein 4 fusion protein	DDX5-ETV4 fusion	Homo sapiens (Human)	519	SUBCELLULAR LOCATION: Nucleus {ECO:0000256|RuleBase:RU004019, ECO:0000256|SAAS:SAAS00594387}.	Nucleus
Q53FW7	Q53FW7_HUMAN	unreviewed	GA binding protein transcription factor, alpha subunit (60kD) variant (Fragment)		Homo sapiens (Human)	454	SUBCELLULAR LOCATION: Nucleus {ECO:0000256|RuleBase:RU004019, ECO:0000256|SAAS:SAAS00594387}.	Nucleus
Q8IYS3	Q8IYS3_HUMAN	unreviewed	GA binding protein transcription factor, alpha subunit 60kDa	GABPA	Homo sapiens (Human)	454	SUBCELLULAR LOCATION: Nucleus {ECO:0000256|RuleBase:RU004019, ECO:0000256|SAAS:SAAS00594387}.	Nucleus
H7C4G5	H7C4G5_HUMAN	unreviewed	RuvB-like helicase (EC 3.6.4.12) (Fragment)	RUVBL1	Homo sapiens (Human)	267	SUBCELLULAR LOCATION: Nucleus {ECO:0000256|RuleBase:RU363048}.	Nucleus
H7C4I3	H7C4I3_HUMAN	unreviewed	RuvB-like helicase (EC 3.6.4.12) (Fragment)	RUVBL1	Homo sapiens (Human)	222	SUBCELLULAR LOCATION: Nucleus {ECO:0000256|RuleBase:RU363048}.	Nucleus
J3QLR1	J3QLR1_HUMAN	unreviewed	RuvB-like helicase (EC 3.6.4.12) (Fragment)	RUVBL1	Homo sapiens (Human)	131	SUBCELLULAR LOCATION: Nucleus {ECO:0000256|RuleBase:RU363048}.	Nucleus
B4DV51	B4DV51_HUMAN	unreviewed	GTP-binding nuclear protein Ran	RAN	Homo sapiens (Human)	128	SUBCELLULAR LOCATION: Nucleus {ECO:0000256|RuleBase:RU363057}.	Nucleus
B5MDF5	B5MDF5_HUMAN	unreviewed	GTP-binding nuclear protein Ran	RAN hCG_1744585	Homo sapiens (Human)	233	SUBCELLULAR LOCATION: Nucleus {ECO:0000256|RuleBase:RU363057}.	Nucleus
F5H018	F5H018_HUMAN	unreviewed	GTP-binding nuclear protein Ran (Fragment)	RAN	Homo sapiens (Human)	198	SUBCELLULAR LOCATION: Nucleus {ECO:0000256|RuleBase:RU363057}.	Nucleus
J3KQE5	J3KQE5_HUMAN	unreviewed	GTP-binding nuclear protein Ran (Fragment)	RAN	Homo sapiens (Human)	234	SUBCELLULAR LOCATION: Nucleus {ECO:0000256|RuleBase:RU363057}.	Nucleus
E9PMQ6	E9PMQ6_HUMAN	unreviewed	Heat shock factor protein 1	HSF1	Homo sapiens (Human)	495	SUBCELLULAR LOCATION: Nucleus {ECO:0000256|SAAS:SAAS00535900}.	Nucleus
Q53HT3	Q53HT3_HUMAN	unreviewed	Heat shock transcription factor 1 variant (Fragment)		Homo sapiens (Human)	529	SUBCELLULAR LOCATION: Nucleus {ECO:0000256|SAAS:SAAS00535900}.	Nucleus
A0A024R7U6	A0A024R7U6_HUMAN	unreviewed	DNA helicase (EC 3.6.4.12)	MCM4 hCG_19799	Homo sapiens (Human)	863	SUBCELLULAR LOCATION: Nucleus {ECO:0000256|SAAS:SAAS00536536}.	Nucleus
B3KMX0	B3KMX0_HUMAN	unreviewed	DNA helicase (EC 3.6.4.12)		Homo sapiens (Human)	863	SUBCELLULAR LOCATION: Nucleus {ECO:0000256|SAAS:SAAS00536536}.	Nucleus
B3KXZ4	B3KXZ4_HUMAN	unreviewed	DNA helicase (EC 3.6.4.12)		Homo sapiens (Human)	808	SUBCELLULAR LOCATION: Nucleus {ECO:0000256|SAAS:SAAS00536536}.	Nucleus
B4DLA6	B4DLA6_HUMAN	unreviewed	DNA helicase (EC 3.6.4.12)		Homo sapiens (Human)	823	SUBCELLULAR LOCATION: Nucleus {ECO:0000256|SAAS:SAAS00536536}.	Nucleus
B4DSV5	B4DSV5_HUMAN	unreviewed	DNA helicase (EC 3.6.4.12)		Homo sapiens (Human)	774	SUBCELLULAR LOCATION: Nucleus {ECO:0000256|SAAS:SAAS00536536}.	Nucleus
B7Z8Z6	B7Z8Z6_HUMAN	unreviewed	DNA helicase (EC 3.6.4.12)		Homo sapiens (Human)	954	SUBCELLULAR LOCATION: Nucleus {ECO:0000256|SAAS:SAAS00536536}.	Nucleus
H0Y8E6	H0Y8E6_HUMAN	unreviewed	DNA helicase (EC 3.6.4.12) (Fragment)	MCM2	Homo sapiens (Human)	836	SUBCELLULAR LOCATION: Nucleus {ECO:0000256|SAAS:SAAS00536536}.	Nucleus
A0A0C4DGG9	A0A0C4DGG9_HUMAN	unreviewed	Chromodomain-helicase-DNA-binding protein 4	CHD4	Homo sapiens (Human)	1937	SUBCELLULAR LOCATION: Nucleus {ECO:0000256|SAAS:SAAS00539527}.	Nucleus
B3KY63	B3KY63_HUMAN	unreviewed	cDNA FLJ16830 fis, clone UTERU3022536, highly similar to Chromodomain helicase-DNA-binding protein 4 (EC 3.6.1.-)		Homo sapiens (Human)	1886	SUBCELLULAR LOCATION: Nucleus {ECO:0000256|SAAS:SAAS00539527}.	Nucleus
F5GWX5	F5GWX5_HUMAN	unreviewed	Chromodomain-helicase-DNA-binding protein 4	CHD4	Homo sapiens (Human)	1905	SUBCELLULAR LOCATION: Nucleus {ECO:0000256|SAAS:SAAS00539527}.	Nucleus
B4DF22	B4DF22_HUMAN	unreviewed	cDNA FLJ55615, highly similar to SWI/SNF-related matrix-associatedactin-dependent regulator of chromatin subfamily C member 2		Homo sapiens (Human)	1019	SUBCELLULAR LOCATION: Nucleus {ECO:0000256|SAAS:SAAS00548613}.	Nucleus
B4DYF9	B4DYF9_HUMAN	unreviewed	cDNA FLJ57669, highly similar to SWI/SNF-related matrix-associatedactin-dependent regulator of chromatin subfamily C member 1		Homo sapiens (Human)	612	SUBCELLULAR LOCATION: Nucleus {ECO:0000256|SAAS:SAAS00548613}.	Nucleus
B4DYQ1	B4DYQ1_HUMAN	unreviewed	cDNA FLJ57671, highly similar to SWI/SNF-related matrix-associated actin-dependent regulator of chromatin subfamily C member 1		Homo sapiens (Human)	996	SUBCELLULAR LOCATION: Nucleus {ECO:0000256|SAAS:SAAS00548613}.	Nucleus
F8VXC8	F8VXC8_HUMAN	unreviewed	SWI/SNF complex subunit SMARCC2	SMARCC2	Homo sapiens (Human)	1245	SUBCELLULAR LOCATION: Nucleus {ECO:0000256|SAAS:SAAS00548613}.	Nucleus
Q58EY4	Q58EY4_HUMAN	unreviewed	SWI/SNF related, matrix associated, actin dependent regulator of chromatin, subfamily c, member 1	SMARCC1	Homo sapiens (Human)	1105	SUBCELLULAR LOCATION: Nucleus {ECO:0000256|SAAS:SAAS00548613}.	Nucleus
Q59G16	Q59G16_HUMAN	unreviewed	SWI/SNF-related matrix-associated actin-dependent regulator of chromatin c2 isoform b variant (Fragment)		Homo sapiens (Human)	1156	SUBCELLULAR LOCATION: Nucleus {ECO:0000256|SAAS:SAAS00548613}.	Nucleus
Q2NKM7	Q2NKM7_HUMAN	unreviewed	DDX11 protein	DDX11	Homo sapiens (Human)	906	SUBCELLULAR LOCATION: Nucleus {ECO:0000256|SAAS:SAAS00553264}.	Nucleus
Q93000	Q93000_HUMAN	unreviewed	CHL1 protein (Fragment)	CHLR1	Homo sapiens (Human)	556	SUBCELLULAR LOCATION: Nucleus {ECO:0000256|SAAS:SAAS00553264}.	Nucleus
K7EJX0	K7EJX0_HUMAN	unreviewed	Mothers against decapentaplegic homolog 2 (Fragment)	SMAD2	Homo sapiens (Human)	217	SUBCELLULAR LOCATION: Nucleus {ECO:0000256|SAAS:SAAS00573677}.	Nucleus
H3BTC2	H3BTC2_HUMAN	unreviewed	COUP transcription factor 2 (Fragment)	NR2F2	Homo sapiens (Human)	93	SUBCELLULAR LOCATION: Nucleus {ECO:0000256|SAAS:SAAS00583777}.	Nucleus
F5GY34	F5GY34_HUMAN	unreviewed	Proteasome subunit alpha type-7-like	PSMA8	Homo sapiens (Human)	63	SUBCELLULAR LOCATION: Nucleus {ECO:0000256|SAAS:SAAS00594407}.	Nucleus
B2RDP6	B2RDP6_HUMAN	unreviewed	cDNA, FLJ96709, highly similar to Homo sapiens glutamate rich WD repeat protein GRWD (GRWD), mRNA		Homo sapiens (Human)	446	SUBCELLULAR LOCATION: Nucleus {ECO:0000256|SAAS:SAAS00694420}.	Nucleus
Q8NCK5	Q8NCK5_HUMAN	unreviewed	cDNA FLJ90195 fis, clone MAMMA1001310		Homo sapiens (Human)	446	SUBCELLULAR LOCATION: Nucleus {ECO:0000256|SAAS:SAAS00694420}.	Nucleus
Q8TCJ8	Q8TCJ8_HUMAN	unreviewed	Uncharacterized protein DKFZp564C172	DKFZp564C172	Homo sapiens (Human)	446	SUBCELLULAR LOCATION: Nucleus {ECO:0000256|SAAS:SAAS00694420}.	Nucleus
A0A024RB67	A0A024RB67_HUMAN	unreviewed	Exportin, tRNA (Nuclear export receptor for tRNAs), isoform CRA_a	XPOT hCG_2014672	Homo sapiens (Human)	617	SUBCELLULAR LOCATION: Nucleus {ECO:0000256|SAAS:SAAS00697510}.	Nucleus
C9JKM9	C9JKM9_HUMAN	unreviewed	Exportin-1 (Fragment)	XPO1	Homo sapiens (Human)	179	SUBCELLULAR LOCATION: Nucleus {ECO:0000256|SAAS:SAAS00697510}.	Nucleus
F8WDU6	F8WDU6_HUMAN	unreviewed	Exportin-T (Fragment)	XPOT	Homo sapiens (Human)	201	SUBCELLULAR LOCATION: Nucleus {ECO:0000256|SAAS:SAAS00697510}.	Nucleus
A0A024R7F7	A0A024R7F7_HUMAN	unreviewed	Transportin 2 (Importin 3, karyopherin beta 2b), isoform CRA_b	TNPO2 hCG_172479	Homo sapiens (Human)	887	SUBCELLULAR LOCATION: Nucleus {ECO:0000256|SAAS:SAAS00784123}.	Nucleus
A0A075B780	A0A075B780_HUMAN	unreviewed	Transportin-2	TNPO2	Homo sapiens (Human)	766	SUBCELLULAR LOCATION: Nucleus {ECO:0000256|SAAS:SAAS00784123}.	Nucleus
A8K5Y7	A8K5Y7_HUMAN	unreviewed	cDNA FLJ78655, highly similar to Homo sapiens exportin 5 (XPO5), mRNA		Homo sapiens (Human)	1204	SUBCELLULAR LOCATION: Nucleus {ECO:0000256|SAAS:SAAS00784123}.	Nucleus
A8K607	A8K607_HUMAN	unreviewed	cDNA FLJ76855, highly similar to Homo sapiens exportin 7 (XPO7), mRNA		Homo sapiens (Human)	1087	SUBCELLULAR LOCATION: Nucleus {ECO:0000256|SAAS:SAAS00784123}.	Nucleus
A8KA19	A8KA19_HUMAN	unreviewed	cDNA FLJ75831, highly similar to Homo sapiens exportin, tRNA (nuclear export receptor for tRNAs) (XPOT), mRNA		Homo sapiens (Human)	962	SUBCELLULAR LOCATION: Nucleus {ECO:0000256|SAAS:SAAS00784123}.	Nucleus
B3KPC8	B3KPC8_HUMAN	unreviewed	cDNA FLJ31621 fis, clone NT2RI2003205, highly similar to Transportin-2		Homo sapiens (Human)	699	SUBCELLULAR LOCATION: Nucleus {ECO:0000256|SAAS:SAAS00784123}.	Nucleus
B3KW08	B3KW08_HUMAN	unreviewed	cDNA FLJ41852 fis, clone NT2RI3004133, highly similar to Exportin-6		Homo sapiens (Human)	1111	SUBCELLULAR LOCATION: Nucleus {ECO:0000256|SAAS:SAAS00784123}.	Nucleus
B4DRY5	B4DRY5_HUMAN	unreviewed	cDNA FLJ54538, highly similar to Transportin-2		Homo sapiens (Human)	880	SUBCELLULAR LOCATION: Nucleus {ECO:0000256|SAAS:SAAS00784123}.	Nucleus
B7ZM10	B7ZM10_HUMAN	unreviewed	XPO6 protein	XPO6	Homo sapiens (Human)	1124	SUBCELLULAR LOCATION: Nucleus {ECO:0000256|SAAS:SAAS00784123}.	Nucleus
E7EQT5	E7EQT5_HUMAN	unreviewed	Importin-5	IPO5	Homo sapiens (Human)	126	SUBCELLULAR LOCATION: Nucleus {ECO:0000256|SAAS:SAAS00784123}.	Nucleus
E7ESC6	E7ESC6_HUMAN	unreviewed	Exportin-7	XPO7	Homo sapiens (Human)	1088	SUBCELLULAR LOCATION: Nucleus {ECO:0000256|SAAS:SAAS00784123}.	Nucleus
F8WDV0	F8WDV0_HUMAN	unreviewed	Importin-11	IPO11	Homo sapiens (Human)	863	SUBCELLULAR LOCATION: Nucleus {ECO:0000256|SAAS:SAAS00784123}.	Nucleus
A0A024R9Z8	A0A024R9Z8_HUMAN	unreviewed	Aryl hydrocarbon receptor, isoform CRA_a	AHR hCG_17373	Homo sapiens (Human)	848	SUBCELLULAR LOCATION: Nucleus {ECO:0000256|SAAS:SAAS00809239}.	Nucleus
A0A1B0GVI7	A0A1B0GVI7_HUMAN	unreviewed	Uncharacterized protein (Fragment)		Homo sapiens (Human)	797	SUBCELLULAR LOCATION: Nucleus {ECO:0000256|SAAS:SAAS00819499}.	Nucleus
Q9Y2X9	ZN281_HUMAN	reviewed	Zinc finger protein 281 (GC-box-binding zinc finger protein 1) (Transcription factor ZBP-99) (Zinc finger DNA-binding protein 99)	ZNF281 GZP1 ZBP99	Homo sapiens (Human)	895	SUBCELLULAR LOCATION: Nucleus {ECO:0000269|PubMed:10448078}.	Nucleus
O14776	TCRG1_HUMAN	reviewed	Transcription elongation regulator 1 (TATA box-binding protein-associated factor 2S) (Transcription factor CA150)	TCERG1 CA150 TAF2S	Homo sapiens (Human)	1098	SUBCELLULAR LOCATION: Nucleus {ECO:0000269|PubMed:10908677, ECO:0000269|PubMed:15485897, ECO:0000269|PubMed:9315662}.	Nucleus
Q9BXW9	FACD2_HUMAN	reviewed	Fanconi anemia group D2 protein (Protein FACD2)	FANCD2 FACD	Homo sapiens (Human)	1451	SUBCELLULAR LOCATION: Nucleus {ECO:0000269|PubMed:11239454, ECO:0000269|PubMed:12093742, ECO:0000269|PubMed:19465921, ECO:0000269|PubMed:19465922}. Note=Concentrates in nuclear foci during S phase and upon genotoxic stress. At the onset of mitosis, excluded from chromosomes and diffuses into the cytoplasm, returning to the nucleus at the end of cell division. Observed in a few spots localized in …	Nucleus
Q53GS9	SNUT2_HUMAN	reviewed	U4/U6.U5 tri-snRNP-associated protein 2 (Inactive ubiquitin-specific peptidase 39) (SAD1 homolog) (U4/U6.U5 tri-snRNP-associated 65 kDa protein) (65K)	USP39 CGI-21 HSPC332 PRO2855	Homo sapiens (Human)	565	SUBCELLULAR LOCATION: Nucleus {ECO:0000269|PubMed:11350945}.	Nucleus
P33240	CSTF2_HUMAN	reviewed	Cleavage stimulation factor subunit 2 (CF-1 64 kDa subunit) (Cleavage stimulation factor 64 kDa subunit) (CSTF 64 kDa subunit) (CstF-64)	CSTF2	Homo sapiens (Human)	577	SUBCELLULAR LOCATION: Nucleus {ECO:0000269|PubMed:11598190}. Note=Localized with DDX1 in cleavage bodies.	Nucleus
Q8WX92	NELFB_HUMAN	reviewed	Negative elongation factor B (NELF-B) (Cofactor of BRCA1)	NELFB COBRA1 KIAA1182	Homo sapiens (Human)	580	SUBCELLULAR LOCATION: Nucleus {ECO:0000269|PubMed:11739404}.	Nucleus
Q96T23	RSF1_HUMAN	reviewed	Remodeling and spacing factor 1 (Rsf-1) (HBV pX-associated protein 8) (Hepatitis B virus X-associated protein) (p325 subunit of RSF chromatin-remodeling complex)	RSF1 HBXAP XAP8	Homo sapiens (Human)	1441	SUBCELLULAR LOCATION: Nucleus {ECO:0000269|PubMed:11788598, ECO:0000269|PubMed:11944984, ECO:0000269|PubMed:12972596}.	Nucleus
P26358	DNMT1_HUMAN	reviewed	DNA (cytosine-5)-methyltransferase 1 (Dnmt1) (EC 2.1.1.37) (CXXC-type zinc finger protein 9) (DNA methyltransferase HsaI) (DNA MTase HsaI) (M.HsaI) (MCMT)	DNMT1 AIM CXXC9 DNMT	Homo sapiens (Human)	1616	SUBCELLULAR LOCATION: Nucleus {ECO:0000269|PubMed:12145218}.	Nucleus
Q13573	SNW1_HUMAN	reviewed	SNW domain-containing protein 1 (Nuclear protein SkiP) (Nuclear receptor coactivator NCoA-62) (Ski-interacting protein)	SNW1 SKIIP SKIP	Homo sapiens (Human)	536	SUBCELLULAR LOCATION: Nucleus {ECO:0000269|PubMed:12840015}.	Nucleus
P42695	CNDD3_HUMAN	reviewed	Condensin-2 complex subunit D3 (Non-SMC condensin II complex subunit D3) (hCAP-D3)	NCAPD3 CAPD3 KIAA0056	Homo sapiens (Human)	1498	SUBCELLULAR LOCATION: Nucleus {ECO:0000269|PubMed:14532007}.	Nucleus
Q86XI2	CNDG2_HUMAN	reviewed	Condensin-2 complex subunit G2 (Chromosome-associated protein G2) (CAP-G2) (hCAP-G2) (Leucine zipper protein 5) (Non-SMC condensin II complex subunit G2)	NCAPG2 LUZP5	Homo sapiens (Human)	1143	SUBCELLULAR LOCATION: Nucleus {ECO:0000269|PubMed:14532007}.	Nucleus
Q96AV8	E2F7_HUMAN	reviewed	Transcription factor E2F7 (E2F-7)	E2F7	Homo sapiens (Human)	911	SUBCELLULAR LOCATION: Nucleus {ECO:0000269|PubMed:15133492}.	Nucleus
Q16630	CPSF6_HUMAN	reviewed	Cleavage and polyadenylation specificity factor subunit 6 (Cleavage and polyadenylation specificity factor 68 kDa subunit) (CFIm68) (CPSF 68 kDa subunit) (Pre-mRNA cleavage factor Im 68 kDa subunit) (Protein HPBRII-4/7)	CPSF6 CFIM68	Homo sapiens (Human)	551	SUBCELLULAR LOCATION: Nucleus {ECO:0000269|PubMed:15169763, ECO:0000269|PubMed:20695905, ECO:0000269|PubMed:9659921}. Note=In punctate subnuclear structures localized adjacent to nuclear speckles, called paraspeckles.	Nucleus
Q13887	KLF5_HUMAN	reviewed	Krueppel-like factor 5 (Basic transcription element-binding protein 2) (BTE-binding protein 2) (Colon krueppel-like factor) (GC-box-binding protein 2) (Intestinal-enriched krueppel-like factor) (Transcription factor BTEB2)	KLF5 BTEB2 CKLF IKLF	Homo sapiens (Human)	457	SUBCELLULAR LOCATION: Nucleus {ECO:0000269|PubMed:15735697}.	Nucleus
Q49A26	GLYR1_HUMAN	reviewed	Putative oxidoreductase GLYR1 (EC 1.-.-.-) (3-hydroxyisobutyrate dehydrogenase-like protein) (Cytokine-like nuclear factor N-PAC) (Glyoxylate reductase 1 homolog) (Nuclear protein NP60) (Nuclear protein of 60 kDa)	GLYR1 HIBDL NP60	Homo sapiens (Human)	553	SUBCELLULAR LOCATION: Nucleus {ECO:0000269|PubMed:16352664}.	Nucleus
Q9UH17	ABC3B_HUMAN	reviewed	DNA dC->dU-editing enzyme APOBEC-3B (A3B) (EC 3.5.4.-) (Phorbolin-1-related protein) (Phorbolin-2/3)	APOBEC3B	Homo sapiens (Human)	382	SUBCELLULAR LOCATION: Nucleus {ECO:0000269|PubMed:16699599, ECO:0000269|PubMed:18667511, ECO:0000269|PubMed:21835787, ECO:0000269|PubMed:22915799}.	Nucleus
Q86UU0	BCL9L_HUMAN	reviewed	B-cell CLL/lymphoma 9-like protein (B-cell lymphoma 9-like protein) (BCL9-like protein) (Protein BCL9-2)	BCL9L DLNB11	Homo sapiens (Human)	1499	SUBCELLULAR LOCATION: Nucleus {ECO:0000269|PubMed:17129358, ECO:0000269|PubMed:17309600}.	Nucleus
O96019	ACL6A_HUMAN	reviewed	Actin-like protein 6A (53 kDa BRG1-associated factor A) (Actin-related protein Baf53a) (ArpNbeta) (BRG1-associated factor 53A) (BAF53A) (INO80 complex subunit K)	ACTL6A BAF53 BAF53A INO80K	Homo sapiens (Human)	429	SUBCELLULAR LOCATION: Nucleus {ECO:0000269|PubMed:18026119}.	Nucleus
Q9UGR2	Z3H7B_HUMAN	reviewed	Zinc finger CCCH domain-containing protein 7B (Rotavirus 'X'-associated non-structural protein) (RoXaN)	ZC3H7B KIAA1031	Homo sapiens (Human)	993	SUBCELLULAR LOCATION: Nucleus {ECO:0000269|PubMed:18799579}. Note=Nuclear localization seems to be depleted upon rotavirus A infection.	Nucleus
P38159	RBMX_HUMAN	reviewed	RNA-binding motif protein, X chromosome (Glycoprotein p43) (Heterogeneous nuclear ribonucleoprotein G) (hnRNP G) [Cleaved into: RNA-binding motif protein, X chromosome, N-terminally processed]	RBMX HNRPG RBMXP1	Homo sapiens (Human)	391	SUBCELLULAR LOCATION: Nucleus {ECO:0000269|PubMed:19282290, ECO:0000269|PubMed:21327109}. Note=Component of ribonucleosomes. Localizes in numerous small granules in the nucleus.	Nucleus
Q9Y3Z3	SAMH1_HUMAN	reviewed	Deoxynucleoside triphosphate triphosphohydrolase SAMHD1 (dNTPase) (EC 3.1.5.-) (Dendritic cell-derived IFNG-induced protein) (DCIP) (Monocyte protein 5) (MOP-5) (SAM domain and HD domain-containing protein 1)	SAMHD1 MOP5	Homo sapiens (Human)	626	SUBCELLULAR LOCATION: Nucleus {ECO:0000269|PubMed:19525956, ECO:0000269|PubMed:23092512, ECO:0000269|PubMed:28229507}.	Nucleus
O15042	SR140_HUMAN	reviewed	U2 snRNP-associated SURP motif-containing protein (140 kDa Ser/Arg-rich domain protein) (U2-associated protein SR140)	U2SURP KIAA0332 SR140	Homo sapiens (Human)	1029	SUBCELLULAR LOCATION: Nucleus {ECO:0000269|PubMed:20858735}.	Nucleus
Q8TDI0	CHD5_HUMAN	reviewed	Chromodomain-helicase-DNA-binding protein 5 (CHD-5) (EC 3.6.4.12) (ATP-dependent helicase CHD5)	CHD5 KIAA0444	Homo sapiens (Human)	1954	SUBCELLULAR LOCATION: Nucleus {ECO:0000269|PubMed:21931736, ECO:0000269|PubMed:23948251}. Note=Associates with heterochromatin. {ECO:0000250}.	Nucleus
Q9C0B1	FTO_HUMAN	reviewed	Alpha-ketoglutarate-dependent dioxygenase FTO (EC 1.14.11.-) (Fat mass and obesity-associated protein)	FTO KIAA1752	Homo sapiens (Human)	505	SUBCELLULAR LOCATION: Nucleus {ECO:0000269|PubMed:22002720, ECO:0000269|PubMed:26458103}. Nucleus speckle {ECO:0000269|PubMed:22002720}.	Nucleus
Q86W42	THOC6_HUMAN	reviewed	THO complex subunit 6 homolog (Functional spliceosome-associated protein 35) (fSAP35) (WD repeat-containing protein 58)	THOC6 WDR58 PSEC0006	Homo sapiens (Human)	341	SUBCELLULAR LOCATION: Nucleus {ECO:0000269|PubMed:23621916}. Nucleus speckle {ECO:0000305|PubMed:23621916}.	Nucleus
P49736	MCM2_HUMAN	reviewed	DNA replication licensing factor MCM2 (EC 3.6.4.12) (Minichromosome maintenance protein 2 homolog) (Nuclear protein BM28)	MCM2 BM28 CCNL1 CDCL1 KIAA0030	Homo sapiens (Human)	904	SUBCELLULAR LOCATION: Nucleus {ECO:0000269|PubMed:8175912}.	Nucleus
P62995	TRA2B_HUMAN	reviewed	Transformer-2 protein homolog beta (TRA-2 beta) (TRA2-beta) (hTRA2-beta) (Splicing factor, arginine/serine-rich 10) (Transformer-2 protein homolog B)	TRA2B SFRS10	Homo sapiens (Human)	288	SUBCELLULAR LOCATION: Nucleus {ECO:0000269|PubMed:9212162, ECO:0000269|PubMed:9546399}.	Nucleus
O43679	LDB2_HUMAN	reviewed	LIM domain-binding protein 2 (LDB-2) (Carboxyl-terminal LIM domain-binding protein 1) (CLIM-1) (LIM domain-binding factor CLIM1)	LDB2 CLIM1	Homo sapiens (Human)	373	SUBCELLULAR LOCATION: Nucleus {ECO:0000269|PubMed:9853615}.	Nucleus
Q9NTZ6	RBM12_HUMAN	reviewed	RNA-binding protein 12 (RNA-binding motif protein 12) (SH3/WW domain anchor protein in the nucleus) (SWAN)	RBM12 KIAA0765 HRIHFB2091	Homo sapiens (Human)	932	SUBCELLULAR LOCATION: Nucleus {ECO:0000269|PubMed:9853615}.	Nucleus
Q8N684	CPSF7_HUMAN	reviewed	Cleavage and polyadenylation specificity factor subunit 7 (Cleavage and polyadenylation specificity factor 59 kDa subunit) (CFIm59) (CPSF 59 kDa subunit) (Pre-mRNA cleavage factor Im 59 kDa subunit)	CPSF7	Homo sapiens (Human)	471	SUBCELLULAR LOCATION: Nucleus {ECO:0000305|PubMed:20695905}.	Nucleus
P10589	COT1_HUMAN	reviewed	COUP transcription factor 1 (COUP-TF1) (COUP transcription factor I) (COUP-TF I) (Nuclear receptor subfamily 2 group F member 1) (V-erbA-related protein 3) (EAR-3)	NR2F1 EAR3 ERBAL3 TFCOUP1	Homo sapiens (Human)	423	SUBCELLULAR LOCATION: Nucleus {ECO:0000305}.	Nucleus
P35250	RFC2_HUMAN	reviewed	Replication factor C subunit 2 (Activator 1 40 kDa subunit) (A1 40 kDa subunit) (Activator 1 subunit 2) (Replication factor C 40 kDa subunit) (RF-C 40 kDa subunit) (RFC40)	RFC2	Homo sapiens (Human)	354	SUBCELLULAR LOCATION: Nucleus {ECO:0000305}.	Nucleus
P42694	HELZ_HUMAN	reviewed	Probable helicase with zinc finger domain (EC 3.6.4.-) (Down-regulated in human cancers protein)	HELZ DRHC KIAA0054	Homo sapiens (Human)	1942	SUBCELLULAR LOCATION: Nucleus {ECO:0000305}.	Nucleus
P43246	MSH2_HUMAN	reviewed	DNA mismatch repair protein Msh2 (hMSH2) (MutS protein homolog 2)	MSH2	Homo sapiens (Human)	934	SUBCELLULAR LOCATION: Nucleus {ECO:0000305}.	Nucleus
Q86U70	LDB1_HUMAN	reviewed	LIM domain-binding protein 1 (LDB-1) (Carboxyl-terminal LIM domain-binding protein 2) (CLIM-2) (LIM domain-binding factor CLIM2) (hLdb1) (Nuclear LIM interactor)	LDB1 CLIM2	Homo sapiens (Human)	411	SUBCELLULAR LOCATION: Nucleus {ECO:0000305}.	Nucleus
Q6P2Q9	PRP8_HUMAN	reviewed	Pre-mRNA-processing-splicing factor 8 (220 kDa U5 snRNP-specific protein) (PRP8 homolog) (Splicing factor Prp8) (p220)	PRPF8 PRPC8	Homo sapiens (Human)	2335	SUBCELLULAR LOCATION: Nucleus speckle {ECO:0000250}.	Nucleus
O75400	PR40A_HUMAN	reviewed	Pre-mRNA-processing factor 40 homolog A (Fas ligand-associated factor 1) (Formin-binding protein 11) (Formin-binding protein 3) (Huntingtin yeast partner A) (Huntingtin-interacting protein 10) (HIP-10) (Huntingtin-interacting protein A) (Renal carcinoma antigen NY-REN-6)	PRPF40A FBP11 FLAF1 FNBP3 HIP10 HYPA HSPC225	Homo sapiens (Human)	957	SUBCELLULAR LOCATION: Nucleus speckle {ECO:0000250}. Nucleus matrix {ECO:0000269|PubMed:16391387}. Note=Colocalizes with AKAP8L in the nuclear matrix. {ECO:0000250}.	Nucleus
P18583	SON_HUMAN	reviewed	Protein SON (Bax antagonist selected in saccharomyces 1) (BASS1) (Negative regulatory element-binding protein) (NRE-binding protein) (Protein DBP-5) (SON3)	SON C21orf50 DBP5 KIAA1019 NREBP HSPC310 HSPC312	Homo sapiens (Human)	2426	SUBCELLULAR LOCATION: Nucleus speckle {ECO:0000269|PubMed:1424986, ECO:0000269|PubMed:21504830}. Note=Colocalizes with the pre-mRNA splicing factor SRSF2.	Nucleus
O43172	PRP4_HUMAN	reviewed	U4/U6 small nuclear ribonucleoprotein Prp4 (PRP4 homolog) (hPrp4) (U4/U6 snRNP 60 kDa protein) (WD splicing factor Prp4)	PRPF4 PRP4	Homo sapiens (Human)	522	SUBCELLULAR LOCATION: Nucleus speckle {ECO:0000269|PubMed:25383878}. Note=Colocalizes with spliceosomal snRNPs. {ECO:0000250}.	Nucleus
Q14498	RBM39_HUMAN	reviewed	RNA-binding protein 39 (CAPER alpha) (Hepatocellular carcinoma protein 1) (RNA-binding motif protein 39) (RNA-binding region-containing protein 2) (Splicing factor HCC1)	RBM39 HCC1 RNPC2	Homo sapiens (Human)	530	SUBCELLULAR LOCATION: Nucleus speckle. Note=Concentrated in nuclear speckles. Colocalizes with the core spliceosomal snRNP proteins.	Nucleus
O75533	SF3B1_HUMAN	reviewed	Splicing factor 3B subunit 1 (Pre-mRNA-splicing factor SF3b 155 kDa subunit) (SF3b155) (Spliceosome-associated protein 155) (SAP 155)	SF3B1 SAP155	Homo sapiens (Human)	1304	SUBCELLULAR LOCATION: Nucleus speckle. Note=During mitosis, transiently dispersed from the nuclear speckles to the cytoplasm.	Nucleus
A8MPP1	D11L8_HUMAN	reviewed	Putative ATP-dependent RNA helicase DDX11-like protein 8 (EC 3.6.4.13) (DEAD/H box protein 11-like 8)	DDX11L8	Homo sapiens (Human)	907	SUBCELLULAR LOCATION: Nucleus, nucleolus {ECO:0000250}.	Nucleus
Q9GZL7	WDR12_HUMAN	reviewed	Ribosome biogenesis protein WDR12 (WD repeat-containing protein 12)	WDR12	Homo sapiens (Human)	423	SUBCELLULAR LOCATION: Nucleus, nucleolus {ECO:0000255|HAMAP-Rule:MF_03029, ECO:0000269|PubMed:12429849, ECO:0000269|PubMed:16043514}. Nucleus, nucleoplasm {ECO:0000255|HAMAP-Rule:MF_03029, ECO:0000269|PubMed:16043514}.	Nucleus
A0A0A0MRW6	A0A0A0MRW6_HUMAN	unreviewed	Nucleolar protein 6	NOL6	Homo sapiens (Human)	1008	SUBCELLULAR LOCATION: Nucleus, nucleolus {ECO:0000256|RuleBase:RU364032}.	Nucleus
B3KPN5	B3KPN5_HUMAN	unreviewed	Nucleolar protein 6		Homo sapiens (Human)	702	SUBCELLULAR LOCATION: Nucleus, nucleolus {ECO:0000256|RuleBase:RU364032}.	Nucleus
B4DF80	B4DF80_HUMAN	unreviewed	Nucleolar protein 6		Homo sapiens (Human)	1094	SUBCELLULAR LOCATION: Nucleus, nucleolus {ECO:0000256|RuleBase:RU364032}.	Nucleus
Q9NYV6	RRN3_HUMAN	reviewed	RNA polymerase I-specific transcription initiation factor RRN3 (Transcription initiation factor IA) (TIF-IA)	RRN3 TIFIA	Homo sapiens (Human)	651	SUBCELLULAR LOCATION: Nucleus, nucleolus {ECO:0000269|PubMed:11250903}.	Nucleus
O76021	RL1D1_HUMAN	reviewed	Ribosomal L1 domain-containing protein 1 (CATX-11) (Cellular senescence-inhibited gene protein) (Protein PBK1)	RSL1D1 CATX11 CSIG PBK1 L12	Homo sapiens (Human)	490	SUBCELLULAR LOCATION: Nucleus, nucleolus {ECO:0000269|PubMed:11790298, ECO:0000269|PubMed:12429849, ECO:0000269|PubMed:18678645, ECO:0000269|PubMed:22419112}. Note=Colocalizes with ING1 in the nucleolus after UV stress. {ECO:0000269|PubMed:22419112}.	Nucleus
Q9NR30	DDX21_HUMAN	reviewed	Nucleolar RNA helicase 2 (EC 3.6.4.13) (DEAD box protein 21) (Gu-alpha) (Nucleolar RNA helicase Gu) (Nucleolar RNA helicase II) (RH II/Gu)	DDX21	Homo sapiens (Human)	783	SUBCELLULAR LOCATION: Nucleus, nucleolus {ECO:0000269|PubMed:11823437, ECO:0000269|PubMed:18180292, ECO:0000269|PubMed:23848194, ECO:0000269|PubMed:25260534, ECO:0000269|PubMed:25470060, ECO:0000269|PubMed:8614622}. Nucleus, nucleoplasm {ECO:0000269|PubMed:11823437, ECO:0000269|PubMed:18180292, ECO:0000269|PubMed:25260534, ECO:0000269|PubMed:25470060}. Note=Present both in nucleolus and nucleopla…	Nucleus
P11387	TOP1_HUMAN	reviewed	DNA topoisomerase 1 (EC 5.99.1.2) (DNA topoisomerase I)	TOP1	Homo sapiens (Human)	765	SUBCELLULAR LOCATION: Nucleus, nucleolus {ECO:0000269|PubMed:12149243}. Nucleus, nucleoplasm {ECO:0000269|PubMed:12149243}. Note=Diffuse nuclear localization with some enrichment in nucleoli. On CPT treatment, cleared from nucleoli into nucleoplasm. Sumoylated forms found in both nucleoplasm and nucleoli.	Nucleus
O75934	SPF27_HUMAN	reviewed	Pre-mRNA-splicing factor SPF27 (Breast carcinoma-amplified sequence 2) (DNA amplified in mammary carcinoma 1 protein) (Spliceosome-associated protein SPF 27)	BCAS2 DAM1	Homo sapiens (Human)	225	SUBCELLULAR LOCATION: Nucleus, nucleolus {ECO:0000269|PubMed:12169396, ECO:0000269|PubMed:12429849, ECO:0000269|PubMed:20176811}.	Nucleus
Q9H0S4	DDX47_HUMAN	reviewed	Probable ATP-dependent RNA helicase DDX47 (EC 3.6.4.13) (DEAD box protein 47)	DDX47	Homo sapiens (Human)	455	SUBCELLULAR LOCATION: Nucleus, nucleolus {ECO:0000269|PubMed:12429849, ECO:0000269|PubMed:16963496}. Note=Localizes in the nucleolar-organizing region during ribosome biogenesis.	Nucleus
Q9H8H0	NOL11_HUMAN	reviewed	Nucleolar protein 11	NOL11 L14	Homo sapiens (Human)	719	SUBCELLULAR LOCATION: Nucleus, nucleolus {ECO:0000269|PubMed:12429849, ECO:0000269|PubMed:22916032}.	Nucleus
O15226	NKRF_HUMAN	reviewed	NF-kappa-B-repressing factor (NFkB-repressing factor) (Protein ITBA4) (Transcription factor NRF)	NKRF ITBA4 NRF	Homo sapiens (Human)	690	SUBCELLULAR LOCATION: Nucleus, nucleolus {ECO:0000269|PubMed:12429849}.	Nucleus
Q14684	RRP1B_HUMAN	reviewed	Ribosomal RNA processing protein 1 homolog B (RRP1-like protein B)	RRP1B KIAA0179	Homo sapiens (Human)	758	SUBCELLULAR LOCATION: Nucleus, nucleolus {ECO:0000269|PubMed:12429849}.	Nucleus
Q9BQ39	DDX50_HUMAN	reviewed	ATP-dependent RNA helicase DDX50 (EC 3.6.4.13) (DEAD box protein 50) (Gu-beta) (Nucleolar protein Gu2)	DDX50	Homo sapiens (Human)	737	SUBCELLULAR LOCATION: Nucleus, nucleolus {ECO:0000269|PubMed:12429849}.	Nucleus
Q9H0D6	XRN2_HUMAN	reviewed	5'-3' exoribonuclease 2 (EC 3.1.13.-) (DHM1-like protein) (DHP protein)	XRN2	Homo sapiens (Human)	950	SUBCELLULAR LOCATION: Nucleus, nucleolus {ECO:0000269|PubMed:12429849}.	Nucleus
Q9Y2X3	NOP58_HUMAN	reviewed	Nucleolar protein 58 (Nucleolar protein 5)	NOP58 NOL5 NOP5 HSPC120	Homo sapiens (Human)	529	SUBCELLULAR LOCATION: Nucleus, nucleolus. Nucleus, nucleoplasm {ECO:0000305}.	Nucleus
Q14669	TRIPC_HUMAN	reviewed	E3 ubiquitin-protein ligase TRIP12 (EC 2.3.2.26) (E3 ubiquitin-protein ligase for Arf) (ULF) (HECT-type E3 ubiquitin transferase TRIP12) (Thyroid receptor-interacting protein 12) (TR-interacting protein 12) (TRIP-12)	TRIP12 KIAA0045 ULF	Homo sapiens (Human)	1992	SUBCELLULAR LOCATION: Nucleus, nucleoplasm {ECO:0000269|PubMed:20208519}.	Nucleus
O94906	PRP6_HUMAN	reviewed	Pre-mRNA-processing factor 6 (Androgen receptor N-terminal domain-transactivating protein 1) (ANT-1) (PRP6 homolog) (U5 snRNP-associated 102 kDa protein) (U5-102 kDa protein)	PRPF6 C20orf14	Homo sapiens (Human)	941	SUBCELLULAR LOCATION: Nucleus, nucleoplasm. Nucleus speckle. Note=Localized in splicing speckles.	Nucleus
Q9Y3T9	NOC2L_HUMAN	reviewed	Nucleolar complex protein 2 homolog (Protein NOC2 homolog) (NOC2-like protein) (Novel INHAT repressor)	NOC2L NIR	Homo sapiens (Human)	749	SUBCELLULAR LOCATION: Nucleus, nucleoplasm. Nucleus, nucleolus. Note=Translocates from the nucleoli to the nucleoplasm in presence of several stressors like ultraviolet irradiation and actinomycin-D. Predominantly detected in the nucleoli in non-mitotic cells. Predominantly detected in nucleoplasma in cells undergoing mitosis.	Nucleus
P42285	SK2L2_HUMAN	reviewed	Superkiller viralicidic activity 2-like 2 (EC 3.6.4.13) (ATP-dependent RNA helicase DOB1) (ATP-dependent RNA helicase SKIV2L2) (TRAMP-like complex helicase)	SKIV2L2 DOB1 KIAA0052 Mtr4	Homo sapiens (Human)	1042	SUBCELLULAR LOCATION: Nucleus, nucleoplasm. Nucleus, nucleolus. Nucleus {ECO:0000269|PubMed:16782053}.	Nucleus
O94913	PCF11_HUMAN	reviewed	Pre-mRNA cleavage complex 2 protein Pcf11 (Pre-mRNA cleavage complex II protein Pcf11)	PCF11 KIAA0824	Homo sapiens (Human)	1555	SUBCELLULAR LOCATION: Nucleus.	Nucleus
P05412	JUN_HUMAN	reviewed	Transcription factor AP-1 (Activator protein 1) (AP1) (Proto-oncogene c-Jun) (V-jun avian sarcoma virus 17 oncogene homolog) (p39)	JUN	Homo sapiens (Human)	331	SUBCELLULAR LOCATION: Nucleus.	Nucleus
P15407	FOSL1_HUMAN	reviewed	Fos-related antigen 1 (FRA-1)	FOSL1 FRA1	Homo sapiens (Human)	271	SUBCELLULAR LOCATION: Nucleus.	Nucleus
P23193	TCEA1_HUMAN	reviewed	Transcription elongation factor A protein 1 (Transcription elongation factor S-II protein 1) (Transcription elongation factor TFIIS.o)	TCEA1 GTF2S TFIIS	Homo sapiens (Human)	301	SUBCELLULAR LOCATION: Nucleus.	Nucleus
P26368	U2AF2_HUMAN	reviewed	Splicing factor U2AF 65 kDa subunit (U2 auxiliary factor 65 kDa subunit) (hU2AF(65)) (hU2AF65) (U2 snRNP auxiliary factor large subunit)	U2AF2 U2AF65	Homo sapiens (Human)	475	SUBCELLULAR LOCATION: Nucleus.	Nucleus
P29558	RBMS1_HUMAN	reviewed	RNA-binding motif, single-stranded-interacting protein 1 (Single-stranded DNA-binding protein MSSP-1) (Suppressor of CDC2 with RNA-binding motif 2)	RBMS1 C2orf12 MSSP MSSP1 SCR2	Homo sapiens (Human)	406	SUBCELLULAR LOCATION: Nucleus.	Nucleus
P51531	SMCA2_HUMAN	reviewed	Probable global transcription activator SNF2L2 (EC 3.6.4.-) (ATP-dependent helicase SMARCA2) (BRG1-associated factor 190B) (BAF190B) (Protein brahma homolog) (hBRM) (SNF2-alpha) (SWI/SNF-related matrix-associated actin-dependent regulator of chromatin subfamily A member 2)	SMARCA2 BAF190B BRM SNF2A SNF2L2	Homo sapiens (Human)	1590	SUBCELLULAR LOCATION: Nucleus.	Nucleus
Q01196	RUNX1_HUMAN	reviewed	Runt-related transcription factor 1 (Acute myeloid leukemia 1 protein) (Core-binding factor subunit alpha-2) (CBF-alpha-2) (Oncogene AML-1) (Polyomavirus enhancer-binding protein 2 alpha B subunit) (PEA2-alpha B) (PEBP2-alpha B) (SL3-3 enhancer factor 1 alpha B subunit) (SL3/AKV core-binding factor alpha B subunit)	RUNX1 AML1 CBFA2	Homo sapiens (Human)	453	SUBCELLULAR LOCATION: Nucleus.	Nucleus
Q05048	CSTF1_HUMAN	reviewed	Cleavage stimulation factor subunit 1 (CF-1 50 kDa subunit) (Cleavage stimulation factor 50 kDa subunit) (CSTF 50 kDa subunit) (CstF-50)	CSTF1	Homo sapiens (Human)	431	SUBCELLULAR LOCATION: Nucleus.	Nucleus
Q06546	GABPA_HUMAN	reviewed	GA-binding protein alpha chain (GABP subunit alpha) (Nuclear respiratory factor 2 subunit alpha) (Transcription factor E4TF1-60)	GABPA E4TF1A	Homo sapiens (Human)	454	SUBCELLULAR LOCATION: Nucleus.	Nucleus
Q09666	AHNK_HUMAN	reviewed	Neuroblast differentiation-associated protein AHNAK (Desmoyokin)	AHNAK PM227	Homo sapiens (Human)	5890	SUBCELLULAR LOCATION: Nucleus.	Nucleus
Q12824	SNF5_HUMAN	reviewed	SWI/SNF-related matrix-associated actin-dependent regulator of chromatin subfamily B member 1 (BRG1-associated factor 47) (BAF47) (Integrase interactor 1 protein) (SNF5 homolog) (hSNF5)	SMARCB1 BAF47 INI1 SNF5L1	Homo sapiens (Human)	385	SUBCELLULAR LOCATION: Nucleus.	Nucleus
Q12996	CSTF3_HUMAN	reviewed	Cleavage stimulation factor subunit 3 (CF-1 77 kDa subunit) (Cleavage stimulation factor 77 kDa subunit) (CSTF 77 kDa subunit) (CstF-77)	CSTF3	Homo sapiens (Human)	717	SUBCELLULAR LOCATION: Nucleus.	Nucleus
Q15637	SF01_HUMAN	reviewed	Splicing factor 1 (Mammalian branch point-binding protein) (BBP) (mBBP) (Transcription factor ZFM1) (Zinc finger gene in MEN1 locus) (Zinc finger protein 162)	SF1 ZFM1 ZNF162	Homo sapiens (Human)	639	SUBCELLULAR LOCATION: Nucleus.	Nucleus
Q8TAQ2	SMRC2_HUMAN	reviewed	SWI/SNF complex subunit SMARCC2 (BRG1-associated factor 170) (BAF170) (SWI/SNF complex 170 kDa subunit) (SWI/SNF-related matrix-associated actin-dependent regulator of chromatin subfamily C member 2)	SMARCC2 BAF170	Homo sapiens (Human)	1214	SUBCELLULAR LOCATION: Nucleus.	Nucleus
Q92922	SMRC1_HUMAN	reviewed	SWI/SNF complex subunit SMARCC1 (BRG1-associated factor 155) (BAF155) (SWI/SNF complex 155 kDa subunit) (SWI/SNF-related matrix-associated actin-dependent regulator of chromatin subfamily C member 1)	SMARCC1 BAF155	Homo sapiens (Human)	1105	SUBCELLULAR LOCATION: Nucleus.	Nucleus
Q9UBU8	MO4L1_HUMAN	reviewed	Mortality factor 4-like protein 1 (MORF-related gene 15 protein) (Protein MSL3-1) (Transcription factor-like protein MRG15)	MORF4L1 MRG15 FWP006 HSPC008 HSPC061 PP368	Homo sapiens (Human)	362	SUBCELLULAR LOCATION: Nucleus.	Nucleus
Q9UKN8	TF3C4_HUMAN	reviewed	General transcription factor 3C polypeptide 4 (EC 2.3.1.48) (TF3C-delta) (Transcription factor IIIC 90 kDa subunit) (TFIIIC 90 kDa subunit) (TFIIIC90) (Transcription factor IIIC subunit delta)	GTF3C4	Homo sapiens (Human)	822	SUBCELLULAR LOCATION: Nucleus.	Nucleus
Q9UPN6	SCAF8_HUMAN	reviewed	Protein SCAF8 (CDC5L complex-associated protein 7) (RNA-binding motif protein 16) (SR-related and CTD-associated factor 8)	SCAF8 CCAP7 KIAA1116 RBM16	Homo sapiens (Human)	1271	SUBCELLULAR LOCATION: Nucleus. Nucleus matrix. Note=Detected in granular nuclear foci which correspond to sites of active transcription. {ECO:0000250}.	Nucleus
Q9BQ04	RBM4B_HUMAN	reviewed	RNA-binding protein 4B (RNA-binding motif protein 30) (RNA-binding motif protein 4B) (RNA-binding protein 30)	RBM4B RBM30	Homo sapiens (Human)	359	SUBCELLULAR LOCATION: Nucleus. Nucleus, nucleolus.	Nucleus
H9KVB1	H9KVB1_HUMAN	unreviewed	Runt-related transcription factor	RUNX1	Homo sapiens (Human)	389	SUBCELLULAR LOCATION: Nucleus {ECO:0000256|PIRNR:PIRNR009374}.	Nucleus
A5D8W6	A5D8W6_HUMAN	unreviewed	Mortality factor 4 like 1	MORF4L1	Homo sapiens (Human)	323	SUBCELLULAR LOCATION: Nucleus {ECO:0000256|PROSITE-ProRule:PRU00972}.	Nucleus
B3KTM8	B3KTM8_HUMAN	unreviewed	Mortality factor 4-like protein 1 (cDNA FLJ38504 fis, clone HCHON2000156, highly similar to Mortality factor 4-like protein 1)	MORF4L1	Homo sapiens (Human)	348	SUBCELLULAR LOCATION: Nucleus {ECO:0000256|PROSITE-ProRule:PRU00972}.	Nucleus
H0YLJ3	H0YLJ3_HUMAN	unreviewed	Mortality factor 4-like protein 1	MORF4L1	Homo sapiens (Human)	269	SUBCELLULAR LOCATION: Nucleus {ECO:0000256|PROSITE-ProRule:PRU00972}.	Nucleus
H0YLV1	H0YLV1_HUMAN	unreviewed	Mortality factor 4-like protein 1 (Fragment)	MORF4L1	Homo sapiens (Human)	113	SUBCELLULAR LOCATION: Nucleus {ECO:0000256|PROSITE-ProRule:PRU00972}.	Nucleus
H0YM21	H0YM21_HUMAN	unreviewed	Mortality factor 4-like protein 1 (Fragment)	MORF4L1	Homo sapiens (Human)	156	SUBCELLULAR LOCATION: Nucleus {ECO:0000256|PROSITE-ProRule:PRU00972}.	Nucleus
H0YMJ0	H0YMJ0_HUMAN	unreviewed	Mortality factor 4-like protein 1 (Fragment)	MORF4L1	Homo sapiens (Human)	245	SUBCELLULAR LOCATION: Nucleus {ECO:0000256|PROSITE-ProRule:PRU00972}.	Nucleus
H0YMT8	H0YMT8_HUMAN	unreviewed	Mortality factor 4-like protein 1 (Fragment)	MORF4L1	Homo sapiens (Human)	118	SUBCELLULAR LOCATION: Nucleus {ECO:0000256|PROSITE-ProRule:PRU00972}.	Nucleus
Q0VAE4	Q0VAE4_HUMAN	unreviewed	MORF4L1 protein	MORF4L1	Homo sapiens (Human)	235	SUBCELLULAR LOCATION: Nucleus {ECO:0000256|PROSITE-ProRule:PRU00972}.	Nucleus
A0A1B0GWA2	A0A1B0GWA2_HUMAN	unreviewed	Alkylglycerone-phosphate synthase (Alkyl-DHAP synthase) (EC 2.5.1.26) (Fragment)	AGPS	Homo sapiens (Human)	543	SUBCELLULAR LOCATION: Peroxisome {ECO:0000256|RuleBase:RU363113}.	Peroxisome
B7Z3Q4	B7Z3Q4_HUMAN	unreviewed	Alkylglycerone-phosphate synthase (Alkyl-DHAP synthase) (EC 2.5.1.26)		Homo sapiens (Human)	568	SUBCELLULAR LOCATION: Peroxisome {ECO:0000256|RuleBase:RU363113}.	Peroxisome
B7ZAC5	B7ZAC5_HUMAN	unreviewed	Alkylglycerone-phosphate synthase (Alkyl-DHAP synthase) (EC 2.5.1.26)		Homo sapiens (Human)	320	SUBCELLULAR LOCATION: Peroxisome {ECO:0000256|RuleBase:RU363113}.	Peroxisome
B8ZZ81	B8ZZ81_HUMAN	unreviewed	Alkylglycerone-phosphate synthase (Alkyl-DHAP synthase) (EC 2.5.1.26)	AGPS	Homo sapiens (Human)	189	SUBCELLULAR LOCATION: Peroxisome {ECO:0000256|RuleBase:RU363113}.	Peroxisome
Q53S12	Q53S12_HUMAN	unreviewed	Alkylglycerone-phosphate synthase (Alkyl-DHAP synthase) (EC 2.5.1.26) (Fragment)	AGPS	Homo sapiens (Human)	143	SUBCELLULAR LOCATION: Peroxisome {ECO:0000256|RuleBase:RU363113}.	Peroxisome
Q53SG6	Q53SG6_HUMAN	unreviewed	Alkylglycerone-phosphate synthase (Alkyl-DHAP synthase) (EC 2.5.1.26) (Fragment)	AGPS	Homo sapiens (Human)	332	SUBCELLULAR LOCATION: Peroxisome {ECO:0000256|RuleBase:RU363113}.	Peroxisome
Q53SN7	Q53SN7_HUMAN	unreviewed	Alkylglycerone-phosphate synthase (Alkyl-DHAP synthase) (EC 2.5.1.26) (Fragment)	AGPS	Homo sapiens (Human)	183	SUBCELLULAR LOCATION: Peroxisome {ECO:0000256|RuleBase:RU363113}.	Peroxisome
[truncated: 3,331 more rows]

## Sheet: HPG_Diaz-Biotin-A_Localisation
Entry	Entry name	Status	Protein names	Gene names	Organism	Length	Subcellular location [CC]	Cellular components
[truncated: 5,002 more rows]

## Sheet: Diazo-Biotin-Az_Hits1
Accession	Description	Coverage	# Peptides	# PSMs	# Unique Peptides	# Protein Groups	# AAs	MW [kDa]	calc. pI	emPAI	Score Sequest HT	# Peptides Sequest HT
[truncated: 5,030 more rows]

[truncated: 5 more sheets: Diazo-Biotin-Az_Hits2, Diazo-Biotin-Az_Hits3, L1_Hits1, L1_Hits2, L1_Hits3]
